# Supplementary material
Source: publisher figshare collection journal article supplement (https://gsapubs.figshare.com/ndownloader/files/26205182)
Supplement: Supplementary file 1 [file 26205182]

## Sheet: Table S1
TABLE S1. LA-ICP-MS ZIRCON U-Pb DATING RESULTS OF LATE TRIASSIC IGNEOUS ROCKS IN THE YIDUN TERRANE
Sample	Th	U	Pb	Th/U		Isotopic ratios (± 1σ)							Ages (± 1σ)
spot	(ppm)	(ppm)	(ppm)			207Pb/206Pb	± 1σ	207Pb/235U	± 1σ	206Pb/238U	± 1σ		207Pb/206Pb	± 1σ	207Pb/235U	± 1σ	206Pb/238U	± 1σ	Concordance
14CA01-1 01	339.213	794.349	30.8019	0.427032		0.0488743	0.000907373	0.227543	0.00407873	0.0337339	0.000275054		142.68	42.5875	208.168	3.37676	213.875	1.71913	1.02742
14CA01-1 02	219.213	552.987	21.8019	0.396417		0.0508287	0.00106186	0.243076	0.00498203	0.0346454	0.000297798		231.55	48.1375	220.936	4.07225	219.557	1.85923	0.993758
14CA01-1 03	753.648	867.873	37.7912	0.868386		0.0548448	0.00112856	0.255539	0.00540561	0.0337118	0.000319292		405.605	41.6625	231.066	4.37446	213.737	1.9945	0.925005
14CA01-1 04	521.491	991.43	39.9314	0.525999		0.0502367	0.000857161	0.2381	0.00397626	0.0342862	0.000258221		205.63	45.36	216.863	3.26432	217.318	1.61369	1.0021
14CA01-1 05	481.003	990.686	38.9381	0.485525		0.0516525	0.000903922	0.240981	0.00379099	0.033807	0.000281948		333.39	40.7375	219.224	3.1054	214.331	1.76192	0.977683
14CA01-1 06	234.332	489.401	19.785	0.478813		0.0518487	0.00127936	0.249963	0.0060663	0.0349079	0.000354401		279.69	62.03	226.546	4.93025	221.192	2.21078	0.976367
14CA01-1 07	270.56	708.795	28.1654	0.381719		0.0509111	0.000928367	0.246596	0.00411707	0.0351435	0.000304394		235.25	42.5825	223.807	3.35691	222.659	1.89944	0.994872
14CA01-1 08	500.692	1385.69	52.4876	0.361331		0.0534565	0.00108965	0.246817	0.00396108	0.0336784	0.000364759		350.055	46.2925	223.987	3.22942	213.529	2.2777	0.953309
14CA01-1 09	548.005	1039.1	42.7739	0.527382		0.0503838	0.0008836	0.243172	0.00421211	0.0349829	0.000307776		213.035	40.7325	221.014	3.4436	221.659	1.92072	1.00292
14CA01-1 10	390.052	806.552	33.4384	0.483604		0.0517769	0.000949437	0.255844	0.00477561	0.0357787	0.000285082		275.99	42.5875	231.312	3.86441	226.614	1.77849	0.979689
14CA01-1 11	164.692	593.809	22.2313	0.277349		0.0514206	0.00133498	0.242163	0.00605967	0.0341824	0.000310525		261.175	59.2475	220.19	4.95562	216.671	1.93914	0.984019
14CA01-1 12	344.819	688.115	28.1017	0.501107		0.0497783	0.00117645	0.240492	0.00531179	0.0350948	0.000282573		183.415	55.545	218.823	4.35041	222.356	1.76391	1.01615
14CA01-1 13	265.776	738.18	29.0156	0.360042		0.0520577	0.00114297	0.250919	0.00549675	0.0349057	0.000285817		287.1	54.625	227.322	4.46444	221.178	1.78435	0.972972
14CA01-1 14	368.082	729.2	29.4302	0.504775		0.0520044	0.00123036	0.249451	0.00548316	0.0348352	0.000318492		287.1	53.6975	226.13	4.45861	220.739	1.98759	0.976159
14CA01-1 15	677.881	1031.67	43.8437	0.657069		0.0526563	0.00112876	0.25142	0.00507408	0.0345891	0.000268806		322.28	48.1425	227.729	4.11994	219.206	1.67908	0.962574
14CA01-1 16	381.431	850.009	32.7855	0.448737		0.0507084	0.00124885	0.235233	0.00538136	0.0336126	0.000283845		227.845	57.3975	214.509	4.42598	213.119	1.77402	0.993516
14CA01-1 17	462.491	990.229	41.2434	0.467055		0.0507396	0.00117677	0.252293	0.00574658	0.0359434	0.000346572		227.845	53.6925	228.437	4.66203	227.639	2.16013	0.996505
14CA01-1 18	372.739	861.959	33.7465	0.432432		0.0512874	0.00135769	0.242338	0.0061274	0.0341746	0.000314646		253.77	65.73	220.333	5.01026	216.623	1.9648	0.983159
14SSL02-1 01	136.79	279.406	37.8033	0.489574		0.0541742	0.00128427	0.268529	0.00672162	0.0358961	0.000323286		388.94	53.7	241.517	5.38277	227.345	2.01556	0.941321
14SSL02-1 02	459.267	903.796	120.029	0.508153		0.0549429	0.00104142	0.252542	0.0036296	0.0333124	0.000195245		409.31	40.7375	228.639	2.94647	211.246	1.22338	0.92393
14SSL02-1 03	351.058	765.57	94.3589	0.458558		0.0535489	0.000915134	0.260579	0.00488805	0.0351964	0.000282348		353.76	34.255	235.134	3.94052	222.989	1.76237	0.948351
14SSL02-1 04	259.84	497.948	64.0119	0.521821		0.0504537	0.000940332	0.243417	0.00471885	0.0349321	0.000273103		216.74	42.5825	221.215	3.85638	221.343	1.7053	1.00058
14SSL02-1 05	380.263	860.527	103.451	0.441895		0.0547007	0.00111633	0.265538	0.00629525	0.0349674	0.00028883		398.2	50.92	239.12	5.0535	221.563	1.80299	0.926575
14SSL02-1 06	339.997	693.908	88.0207	0.489974		0.0540334	0.00102944	0.250671	0.00472377	0.0336296	0.000276645		372.275	42.5875	227.121	3.83819	213.225	1.72918	0.938815
14SSL02-1 07	256.139	448.808	63.7496	0.570708		0.0516242	0.000985197	0.245894	0.00468284	0.0345252	0.000292248		333.39	44.44	223.235	3.81946	218.808	1.82491	0.980167
14SSL02-1 08	235.596	489.906	59.5376	0.4809		0.0510233	0.000951608	0.248229	0.00461936	0.0352567	0.000299088		242.66	42.5825	225.137	3.76078	223.365	1.86628	0.99213
14SSL02-1 09	256.172	386.602	62.2628	0.662623		0.0493926	0.00101964	0.231587	0.00462954	0.0339945	0.000273079		164.9	48.14	211.508	3.81953	215.5	1.70648	1.01888
14SSL02-1 10	269.606	409.36	64.0702	0.658604		0.0503318	0.00116419	0.236015	0.00502009	0.0340795	0.000288176		209.33	49.065	215.152	4.12659	216.03	1.80026	1.00408
14SSL02-1 11	142.064	216.132	34.4967	0.6573		0.0494466	0.00131765	0.228624	0.00606666	0.0334977	0.000318745		168.6	62.9525	209.062	5.01574	212.402	1.99147	1.01598
14SSL02-1 12	460.995	868.355	113.197	0.530883		0.05055	0.000971374	0.237824	0.00448664	0.0340319	0.000268221		220.44	44.435	216.637	3.68333	215.733	1.67621	0.995828
14SSL02-1 13	230.116	538.358	60.7972	0.42744		0.0500693	0.000894045	0.239327	0.00394532	0.0346915	0.000264842		198.23	36.1025	217.869	3.2358	219.844	1.6543	1.00907
14SSL02-1 14	163.448	304.659	43.4441	0.536495		0.0528297	0.00124082	0.258846	0.00606604	0.035522	0.000293411		320.43	19.4425	233.736	4.89544	225.016	1.8306	0.962693
14SSL02-1 15	420.137	1029.86	109.646	0.407956		0.0517235	0.000730632	0.243747	0.00344651	0.0341074	0.000217628		272.285	33.33	221.484	2.81773	216.204	1.36166	0.976159
14SSL02-1 16	495.419	631.003	117.513	0.785129		0.0514339	0.000946648	0.239553	0.00423657	0.0338048	0.000250866		261.175	42.585	218.054	3.47356	214.317	1.56858	0.982862
14SSL02-1 17	155.772	241.969	38.2784	0.643771		0.0530159	0.00120392	0.251036	0.00545988	0.0344488	0.00029359		327.835	56.475	227.417	4.43412	218.332	1.83337	0.96005
14SSL02-1 18	495.663	656.636	115.858	0.754851		0.050388	0.000876846	0.236915	0.00419508	0.0340643	0.000252503		213.035	40.7325	215.891	3.44686	215.935	1.57843	1.00021
14SSL02-1 19	284.544	504.626	71.2003	0.563871		0.0512699	0.000909864	0.245013	0.00428078	0.0346891	0.000268677		253.77	43.5125	222.517	3.49451	219.829	1.67814	0.98792
14SSL02-1 20	306.188	658.116	79.224	0.465248		0.051136	0.000821242	0.247674	0.00397249	0.0351095	0.000245495		255.62	37.0325	224.685	3.2365	222.448	1.5336	0.990043
14SSL02-1 21	386.276	675.271	97.8916	0.572031		0.0519519	0.000897664	0.251958	0.0043366	0.0351342	0.000229403		283.395	40.735	228.165	3.52056	222.602	1.43368	0.975616
14SSL02-1 22	213.437	418.475	56.1667	0.510036		0.0500028	0.000941944	0.247985	0.00464293	0.0360075	0.000308488		194.525	44.435	224.938	3.78066	228.038	1.92347	1.01378
14SSL02-1 23	252.01	563.645	64.7213	0.447107		0.0492469	0.000873775	0.239172	0.0042124	0.0352355	0.000309672		166.75	47.215	217.742	3.45483	223.232	1.93209	1.02522
14SSL02-1 24	207.322	377.075	53.294	0.549816		0.0501327	0.00117778	0.249092	0.00589998	0.0360613	0.000336571		211.185	53.695	225.838	4.79853	228.373	2.09779	1.01122
14SLL10-2 01	301.063	438.701	18.5323	0.686261		0.0574004	0.00180841	0.266416	0.00872938	0.0335089	0.000345283		505.595	70.365	239.824	7.00091	212.472	2.15673	0.885949
14SLL10-2 02	224.86	340.603	14.1179	0.660182		0.051544	0.00154924	0.237136	0.00636382	0.0334429	0.000386186		264.88	68.5075	216.073	5.22519	212.06	2.41167	0.981429
14SLL10-2 03	438.367	842.214	33.6633	0.520494		0.0550673	0.00146441	0.251376	0.00579402	0.0331373	0.000386449		416.715	59.2525	227.693	4.70389	210.154	2.41398	0.922969
14SLL10-2 04	4187.48	2691.98	137.352	1.55554		0.258419	0.00965125	0.902999	0.0260272	0.0260729	0.00053683		3238.89	58.9475	653.329	13.8944	165.923	3.37388	0.253965
14SLL10-2 05	429.726	577.421	24.3732	0.744215		0.0502776	0.00112255	0.233498	0.00517875	0.0335317	0.000325001		209.33	51.84	213.083	4.26547	212.614	2.03037	0.997801
14SLL10-2 06	157.66	305.44	12.1492	0.516173		0.0518789	0.00157778	0.239822	0.0070869	0.0334891	0.000470838		279.69	70.3625	218.275	5.80589	212.349	2.9391	0.972851
14SLL10-2 07	128.175	305.818	11.7882	0.419122		0.0508495	0.0013536	0.232843	0.00569931	0.0331935	0.000348086		235.25	61.1	212.543	4.69624	210.504	2.17479	0.990408
14SLL10-2 08	357.15	543.116	24.7887	0.657595		0.053842	0.00121315	0.280518	0.00942088	0.0372831	0.000758131		364.87	45.365	251.068	7.47222	235.97	4.71329	0.939865
14SLL10-2 09	463.53	826.127	32.9485	0.561088		0.0601916	0.00125163	0.271731	0.00581718	0.0326365	0.000326365		609.28	44.435	244.077	4.64755	207.028	2.04045	0.848207
14SLL10-2 10	572.044	762.747	32.4134	0.749979		0.0511588	0.000946972	0.239364	0.00431889	0.0338658	0.00029501		255.62	47.215	217.9	3.54147	214.697	1.84311	0.985304
14SLL10-2 11	340.015	583.407	23.9386	0.582809		0.0518157	0.0010341	0.244159	0.00522914	0.0340633	0.000339161		275.99	46.29	221.82	4.27027	215.929	2.11756	0.973442
14SLL10-2 12	3077.19	2508.92	218.332	1.2265		0.160515	0.0177815	1.42146	0.274107	0.0448254	0.00256619		2460.8	189.042	897.976	114.942	282.674	15.8337	0.31479
14SLL10-2 13	942.138	1345.83	49.6088	0.700043		0.0767722	0.00156631	0.30643	0.00679597	0.0288717	0.000296015		1116.66	40.74	271.41	5.28518	183.483	1.85733	0.676034
14SLL10-2 14	464.601	850.199	33.1244	0.546462		0.0930904	0.00422946	0.366039	0.0153227	0.0289016	0.000357284		1500	81.02	316.713	11.3915	183.67	2.2407	0.579925
14SLL10-2 15	413.797	775.826	33.0853	0.533363		0.0703741	0.00188268	0.326581	0.00748117	0.0339055	0.000403842		938.885	55.5575	286.953	5.72951	214.945	2.52063	0.749062
14SLL10-2 16	50.836	120.859	4.69774	0.420621		0.055982	0.00247852	0.255147	0.00987155	0.0333982	0.000480689		450.045	98.1375	230.748	7.98738	211.782	3.00075	0.917803
14SLL10-2 17	1005.58	1563.96	54.0005	0.642969		0.0937738	0.00222938	0.337936	0.00571422	0.0266206	0.000518892		1503.39	45.06	295.607	4.34128	169.363	3.25954	0.572933
14SLL10-2 18	190.838	323.816	12.9341	0.589342		0.051049	0.00239206	0.234091	0.00808903	0.0331609	0.00039849		242.66	107.39	213.57	6.65706	210.301	2.48898	0.984695
14SLL15-1 01	504.482	982.23	37.913	0.513608		0.0589479	0.00120825	0.259482	0.00528868	0.0318987	0.000265942		564.85	44.435	234.249	4.26666	202.42	1.66497	0.864123
14SLL15-1 02	707.358	1087.17	45.3947	0.650643		0.0519509	0.00108763	0.244268	0.00513955	0.0340346	0.000303467		283.395	48.145	221.91	4.19683	215.75	1.89547	0.972244
14SLL15-1 03	354.226	865.799	33.3751	0.409132		0.0508627	0.000986806	0.235072	0.00436008	0.0334734	0.000282117		235.25	44.435	214.377	3.58749	212.25	1.76347	0.990079
14SLL15-1 04	331.079	769.645	30.2921	0.430171		0.050201	0.00240734	0.227997	0.00775822	0.033085	0.000330805		211.185	111.095	208.544	6.41653	209.827	2.06732	1.00615
14SLL15-1 05	170.097	419.332	17.5956	0.405639		0.0549081	0.00140905	0.277377	0.00759513	0.0364954	0.000491765		409.31	57.4025	248.575	6.03971	231.073	3.06104	0.929591
14SLL15-1 06	447.144	1056.84	42.7603	0.423095		0.0525649	0.00116741	0.247005	0.00529998	0.033973	0.000370821		309.32	51.8475	224.14	4.31824	215.366	2.31485	0.960853
14SLL15-1 07	220.13	503.315	19.0852	0.43736		0.05026	0.00122846	0.225824	0.0053785	0.0325021	0.000311431		205.63	55.545	206.746	4.45737	206.189	1.9476	0.997308
14SLL15-1 08	244.77	443.157	17.4634	0.552331		0.0523565	0.00129676	0.237885	0.00567291	0.0329119	0.000333774		301.91	62.03	216.687	4.65558	208.747	2.08613	0.963358
14SLL15-1 09	286.54	503.821	19.5601	0.568734		0.0530848	0.001217	0.236926	0.00540919	0.0323261	0.000366602		331.54	51.8475	215.901	4.44279	205.09	2.29194	0.949928
14SLL15-1 10	410.898	579.587	25.0492	0.70895		0.0525706	0.00138752	0.256316	0.00735341	0.0351834	0.000434382		309.32	59.2525	231.693	5.94528	222.908	2.70771	0.962083
14SLL15-1 11	219.6	457.665	18.0268	0.479827		0.0506978	0.00130711	0.234783	0.00600537	0.0335009	0.000346547		227.845	61.1	214.139	4.94047	212.422	2.16461	0.991981
14SLL15-1 12	228.984	485.184	19.8764	0.471954		0.0526657	0.00148024	0.251622	0.00676642	0.0346405	0.000413414		322.28	62.9575	227.893	5.49147	219.527	2.57854	0.963287
14SLL15-1 13	878.527	1391.71	51.4269	0.631255		0.0603474	0.00139681	0.257981	0.00751069	0.0307989	0.000457279		616.685	49.99	233.038	6.06435	195.546	2.86168	0.839117
14SLL15-1 14	233.253	460.907	18.0412	0.506074		0.0493724	0.00129854	0.225128	0.00554803	0.0330885	0.000309533		164.9	65.73	206.169	4.60033	209.849	1.93479	1.01785
14SLL15-1 15	565.83	1343.22	46.6083	0.421249		0.0530114	0.00098147	0.221595	0.00476622	0.0302712	0.000451901		327.835	42.5875	203.236	3.96407	192.246	2.82945	0.945922
14SLL15-1 16	372.829	626.762	25.3499	0.594849		0.0498208	0.00112047	0.230009	0.0051397	0.0334345	0.000287096		187.12	19.44	210.206	4.24527	212.008	1.79452	1.00857
14SLL15-1 17	466.895	901.91	35.5544	0.517673		0.0536914	0.00107451	0.243419	0.00465403	0.0328524	0.000276154		366.72	72.215	221.217	3.80348	208.376	1.72725	0.941955
14SLL15-1 18	401.388	676.761	27.2539	0.593102		0.0490886	0.00112761	0.227558	0.00534723	0.0335498	0.000307693		153.79	53.695	208.181	4.42526	212.727	1.92257	1.02184
14SLL15-1 19	562.782	794.24	34.2161	0.70858		0.0520773	0.00108646	0.25238	0.00572536	0.035042	0.000324975		287.1	52.7725	228.508	4.64451	222.027	2.02755	0.97164
14SLL15-1 20	383.037	730.228	28.8942	0.524545		0.0497075	0.00105091	0.231214	0.00498021	0.033671	0.000254047		188.97	49.99	211.201	4.10969	213.483	1.58854	1.01081
14SLL15-1 21	555.524	1187.35	48.0904	0.467869		0.0521292	0.000928889	0.249378	0.00465768	0.034618	0.000262997		300.06	40.7375	226.071	3.78847	219.386	1.64294	0.970431
14SLL15-1 22	400.551	931.41	35.0752	0.430048		0.0490263	0.000853976	0.223581	0.00396784	0.0330309	0.000245091		150.085	40.735	204.886	3.29564	209.49	1.53362	1.02247
14SLL15-1 23	235.666	500.121	19.8374	0.471218		0.0505938	0.00127389	0.238479	0.00572418	0.0342272	0.000275556		233.4	57.395	217.174	4.69537	216.951	1.72155	0.99897
14SLL15-1 24	190.47	436.945	17.8044	0.435913		0.0513246	0.00138052	0.250798	0.0064707	0.0355252	0.000322278		253.77	62.9525	227.224	5.25511	225.036	2.00994	0.990371
14LT04-1 01	1360.96	1072.77	50.9941	1.26864		0.0512023	0.000676569	0.241343	0.00313733	0.0341387	0.000216396		250.065	29.625	219.519	2.57059	216.399	1.35398	0.985787
14LT04-1 02	2692.18	1629.64	85.6596	1.65201		0.0506335	0.000618446	0.243351	0.00304846	0.0347908	0.000233634		233.4	29.6225	221.161	2.49406	220.463	1.46032	0.996842
14LT04-1 03	674.834	589.786	27.3943	1.1442		0.0522233	0.00120091	0.258436	0.00731656	0.0356825	0.000394034		294.505	51.845	233.406	5.90559	226.015	2.45562	0.968336
14LT04-1 04	478.83	528.412	23.1267	0.906169		0.0499236	0.00107481	0.243793	0.00555861	0.0353615	0.000331459		190.82	49.99	221.522	4.54033	224.017	2.06729	1.01127
14LT04-1 05	126.97	271.628	10.6348	0.467439		0.0497201	0.00126007	0.238196	0.00574009	0.034829	0.000346275		188.97	59.2475	216.942	4.70947	220.701	2.16039	1.01733
14LT04-1 06	443.169	483.836	21.6002	0.915948		0.0522517	0.00101679	0.256742	0.00538385	0.0355496	0.000374615		298.21	44.44	232.038	4.35273	225.188	2.33519	0.970478
14LT04-1 07	574.825	559.504	24.8106	1.02738		0.0509434	0.00107242	0.241627	0.00520686	0.0343491	0.000309185		238.955	48.14	219.752	4.26071	217.711	1.93053	0.99071
14LT04-1 08	1894.94	1635.31	77.4194	1.15877		0.050774	0.000715231	0.247963	0.00352647	0.0353415	0.00024875		231.55	31.4725	224.92	2.87332	223.893	1.55352	0.995432
14LT04-1 09	270.954	402.998	17.2874	0.672347		0.0499399	0.00114224	0.246657	0.00537713	0.0358346	0.000324179		190.82	27.7725	223.857	4.38223	226.962	2.02121	1.01387
14LT04-1 10	787.768	632.024	30.1824	1.24642		0.0607762	0.00189025	0.293751	0.0107852	0.0346647	0.000347521		631.5	68.5075	261.508	8.4665	219.677	2.16845	0.840041
14LT04-1 11	843.726	1145.94	48.6273	0.736273		0.0508477	0.00112655	0.257018	0.00604819	0.0366657	0.000512158		235.25	47.2125	232.261	4.88811	232.132	3.18727	0.999447
14LT04-1 12	3364.27	2843.11	131.439	1.1833		0.0510565	0.000899751	0.241524	0.00441526	0.0342268	0.000327308		242.66	36.105	219.668	3.61412	216.948	2.0435	0.987619
14LT04-1 13	1195.78	704.862	35.7572	1.69647		0.0500556	0.00154745	0.229582	0.00735776	0.0332666	0.000250685		198.23	104.615	209.853	6.07768	210.96	1.56814	1.00527
14LT04-1 14	907.458	742.699	34.8851	1.22184		0.0484746	0.00169931	0.227986	0.00826875	0.0341802	0.000295089		124.16	86.1	208.535	6.83864	216.658	1.84311	1.03895
14LT04-1 15	927.55	690.205	33.1758	1.34388		0.0488085	0.00197919	0.229933	0.00974576	0.0342268	0.000274562		138.975	96.2825	210.144	8.04697	216.948	1.71537	1.03238
14LT04-1 16	948.372	881.299	40.2812	1.07611		0.0483404	0.00213952	0.230395	0.0109221	0.0345633	0.000274718		122.31	103.69	210.524	9.01463	219.045	1.71586	1.04047
14LT04-1 17	2576.28	1985.06	95.3014	1.29783		0.0490198	0.00245205	0.232943	0.0124319	0.0345043	0.000266645		150.085	113.873	212.625	10.2393	218.678	1.66576	1.02847
14LT04-1 18	1594.75	1070.97	53.3673	1.48906		0.0465715	0.00263456	0.222327	0.0134402	0.0346715	0.000288049		33.43	133.32	203.845	11.1656	219.72	1.79858	1.07788
15DC09-2 01	594.944	1114.99	66.7802	0.533587		0.18187	0.002927	0.920629	0.013362	0.0367969	0.000278427		2670.06	27.6225	662.693	7.07848	232.948	1.73572	0.351518
15DC09-2 02	394.044	1070.18	44.653	0.368204		0.144927	0.00220612	0.595019	0.00888145	0.0300203	0.000395507		2286.73	26.2325	474.068	5.66308	190.676	2.47743	0.402211
15DC09-2 03	440.661	773.278	31.5187	0.569861		0.0546096	0.000829265	0.257163	0.00382195	0.0341727	0.00026014		394.495	35.1825	232.378	3.09095	216.611	1.62577	0.932149
15DC09-2 04	562.926	1340.94	76.1775	0.4198		0.20317	0.00259721	0.983818	0.0130311	0.0352283	0.000389155		2851.54	20.985	695.561	6.68649	223.188	2.42628	0.320874
15DC09-2 05	528.577	1781.87	62.5603	0.296642		0.0711113	0.00123659	0.294182	0.00492844	0.030008	0.000191194		961.11	35.96	261.846	3.87083	190.598	1.20103	0.727904
15DC09-2 06	155.996	386.991	15.3852	0.4031		0.055866	0.00121819	0.277411	0.00742002	0.035693	0.000410707		455.6	48.1425	248.601	5.90042	226.081	2.55926	0.909411
15DC09-2 07	3003.75	4744.4	109.946	0.633114		0.208534	0.0025392	0.399844	0.00542945	0.0139753	0.000179433		2894.14	18.9825	341.535	3.94512	89.467	1.14178	0.261955
15DC09-2 08	411.549	762.119	27.6903	0.540006		0.0554373	0.000775148	0.230217	0.00319784	0.0301504	0.000229995		431.53	31.4775	210.378	2.64327	191.489	1.44296	0.910217
15DC09-2 09	175.968	460.926	17.6552	0.38177		0.0563346	0.00106984	0.257651	0.00535104	0.0330811	0.000271175		464.86	36.1075	232.772	4.32314	209.803	1.69592	0.901323
15DC09-2 10	130.48	342.532	13.3668	0.380928		0.0592605	0.00108028	0.271225	0.00489174	0.0332602	0.000289248		575.96	8.33	243.673	3.91076	210.92	1.80818	0.865589
15DC09-2 11	565.059	1022.94	43.8141	0.55239		0.0811168	0.00272076	0.362206	0.011588	0.0324701	0.000238268		1233.33	60.955	313.861	8.64025	205.989	1.49182	0.656308
15DC09-2 12	225.107	716.614	26.7845	0.314126		0.0508412	0.000746142	0.234433	0.0038477	0.0333941	0.000288133		235.25	67.58	213.852	3.16827	211.756	1.80103	0.990199
15DC09-2 13	222.047	475.33	19.4465	0.467143		0.071852	0.00187485	0.337516	0.00863608	0.0341477	0.000281368		983.335	53.7075	295.288	6.55921	216.455	1.75781	0.733031
15DC09-2 14	917.477	2138.86	163.677	0.428957		0.361396	0.00434962	1.77818	0.0336326	0.0353457	0.000354109		3766.66	17.52	1037.51	12.3124	223.919	2.20812	0.215822
15DC09-2 15	742.558	2133.4	112.99	0.348063		0.176758	0.00792048	0.762944	0.0278097	0.0324361	0.000314953		2633.34	74.695	575.707	16.022	205.777	1.96967	0.357434
15DC09-2 16	703.424	1694.56	123.706	0.415106		0.221483	0.0115993	1.11987	0.0542085	0.0370998	0.000240929		2991.66	84.26	762.911	25.9702	234.831	1.50293	0.307809
15DC09-2 17	368.64	1309.42	56.5511	0.281528		0.109896	0.00247373	0.508578	0.0132308	0.033337	0.000248013		1798.15	36.1125	417.492	8.90979	211.4	1.55142	0.506356
15DC09-2 18	185.582	589.737	22.4257	0.314686		0.0514457	0.000712241	0.246106	0.0034283	0.034701	0.000255896		261.175	36.1075	223.408	2.79766	219.903	1.59871	0.984313
15DC14-1 01	386.781	1288.19	50.6508	0.300252		0.0584853	0.000819306	0.279577	0.00436843	0.034546	0.000263974		546.33	36.105	250.322	3.47066	218.938	1.6491	0.874625
15DC14-1 02	172.009	573.741	21.9919	0.299801		0.0517383	0.000808002	0.24938	0.0040283	0.0349369	0.000299451		272.285	35.1825	226.073	3.27745	221.373	1.86904	0.979212
15DC14-1 03	493.98	1370.32	56.0839	0.360484		0.0602909	0.000899741	0.293211	0.00394648	0.0353528	0.000298747		612.98	33.3275	261.084	3.10372	223.963	1.86401	0.85782
15DC14-1 04	122.033	387.509	15.002	0.314916		0.0517445	0.000947739	0.25477	0.00467727	0.0357586	0.000362727		272.285	42.5875	230.444	3.78818	226.489	2.26087	0.98284
15DC14-1 05	512.494	1714.21	69.2535	0.298968		0.0703737	0.00149373	0.343462	0.00881292	0.0349676	0.000320176		938.885	44.445	299.792	6.66389	221.564	1.99784	0.739061
15DC14-1 06	248.068	707.783	26.8748	0.350485		0.0515424	0.000809113	0.243329	0.00387939	0.0341979	0.000322443		264.88	37.0325	221.143	3.17173	216.768	2.01327	0.980217
15DC14-1 07	137.737	281.258	12.8773	0.489719		0.0874815	0.00213761	0.460528	0.013672	0.0376582	0.000414232		1372.22	46.76	384.625	9.50861	238.301	2.57662	0.619568
15DC14-1 08	333.473	713.552	29.2201	0.467342		0.0512925	0.000702283	0.251403	0.00366034	0.0355058	0.000298797		253.77	31.4775	227.716	2.97402	224.916	1.86409	0.987704
15DC14-1 09	278.172	689.805	29.4116	0.403262		0.0709263	0.00218995	0.343079	0.010943	0.0350618	0.000248399		955.24	58.3325	299.502	8.27552	222.151	1.55168	0.741733
15DC14-1 10	177.467	472.262	18.75	0.37578		0.0535857	0.00080652	0.263092	0.00465306	0.0355117	0.000327937		353.76	33.33	237.156	3.74401	224.952	2.04513	0.948543
15DC14-1 11	427.967	1438.92	65.0865	0.297422		0.0634561	0.00123717	0.384892	0.0128283	0.0427394	0.000694947		724.08	40.7375	330.631	9.40822	269.791	4.29876	0.815987
15DC14-1 12	261.93	712.876	29.7117	0.367427		0.0507063	0.000682622	0.260095	0.00337372	0.0372599	0.000278644		227.845	31.4725	234.744	2.72322	235.826	1.73641	1.00461
15DC14-1 13	572.031	1306.36	56.8177	0.437883		0.0602876	0.000655471	0.313028	0.00421519	0.0375926	0.000330872		612.98	24.0675	276.525	3.26508	237.893	2.05967	0.860296
15DC14-1 14	362.995	545.789	34.7995	0.665083		0.162287	0.00714881	0.992617	0.0610045	0.042365	0.000552216		2479.93	75.155	700.055	31.0899	267.476	3.41818	0.382078
15DC14-1 15	214.75	565.175	21.5277	0.37997		0.0511475	0.000660102	0.237748	0.00312118	0.0336929	0.000204552		255.62	29.625	216.574	2.56468	213.619	1.28085	0.986356
15DC14-1 16	230.361	501.891	23.2212	0.458986		0.0921852	0.00462309	0.477558	0.027848	0.0359692	0.000367751		1472.22	95.835	396.396	19.1391	227.8	2.29167	0.574677
15DC14-1 17	104.843	242.871	11.6627	0.431681		0.0558593	0.00180802	0.337171	0.0143694	0.0421038	0.000921668		455.6	72.215	295.026	10.9133	265.86	5.70321	0.901141
15DC14-1 18	490.685	604.206	27.9136	0.812116		0.0725918	0.00232922	0.35648	0.0139136	0.0351589	0.000313034		1011.11	33.18	309.583	10.417	222.756	1.95312	0.719534
15DC16-1 01	559.982	801.206	33.2804	0.698924		0.0505741	0.000679475	0.237588	0.00310797	0.034007	0.00019346		220.44	31.475	216.443	2.55419	215.578	1.21171	0.996003
15DC16-1 02	574.872	973.449	39.2587	0.590552		0.0512876	0.000643076	0.23951	0.00291161	0.0338035	0.000187209		253.77	24.9975	218.019	2.38974	214.309	1.17309	0.982984
15DC16-1 03	413.684	893.737	35.7142	0.46287		0.0501417	0.000589278	0.240034	0.00287549	0.0346406	0.000210984		211.185	27.77	218.449	2.35923	219.527	1.31989	1.00494
15DC16-1 04	679.324	1130.02	44.7069	0.601164		0.0504511	0.000600102	0.237478	0.00323517	0.0340952	0.000321563		216.74	27.77	216.353	2.65862	216.128	2.00797	0.998956
15DC16-1 05	325.798	886.833	34.3126	0.367373		0.0492725	0.000571891	0.235406	0.00280332	0.03457	0.000213471		161.195	-6.4775	214.652	2.30867	219.087	1.33539	1.02066
15DC16-1 06	398.878	990.558	38.6701	0.40268		0.0497658	0.00061566	0.239058	0.00304498	0.034779	0.000252421		183.415	29.6225	217.649	2.49968	220.389	1.57702	1.01259
15DC16-1 07	219.451	546.257	21.5042	0.401736		0.0508191	0.000708475	0.24572	0.00338194	0.0350662	0.000240552		231.55	26.8475	223.094	2.76078	222.178	1.50296	0.995896
15DC16-1 08	281.479	727.041	28.2567	0.387157		0.0526419	0.000622519	0.251231	0.00316263	0.0346081	0.000270667		322.28	25.9225	227.576	2.57116	219.324	1.69062	0.963743
15DC16-1 09	469.774	921.459	37.3427	0.509815		0.0516198	0.000582488	0.252386	0.00318402	0.0354636	0.00031151		333.39	25.9225	228.513	2.58614	224.653	1.94314	0.983109
15DC16-1 10	421.894	973.478	37.2371	0.433388		0.0531226	0.000627933	0.244809	0.0029932	0.0333879	0.00019619		344.5	27.775	222.351	2.44621	211.717	1.22919	0.952176
15DC16-1 11	381.345	871.738	33.5612	0.437453		0.0508366	0.000587992	0.237597	0.00294196	0.033864	0.000220112		235.25	27.7725	216.451	2.41821	214.687	1.37734	0.991851
15DC16-1 12	444.251	866.172	34.8156	0.51289		0.05237	0.000656911	0.248807	0.00358835	0.0343931	0.000263863		301.91	29.6275	225.607	2.92166	217.984	1.64862	0.966214
15DC16-1 13	861.246	1894.64	73.3275	0.45457		0.0508725	0.00045352	0.237272	0.00214698	0.0337922	0.000173937		235.25	20.3675	216.184	1.76807	214.239	1.09077	0.991
15DC16-1 14	271.784	691.336	26.6908	0.393129		0.0503802	0.000679442	0.238644	0.00302309	0.0343847	0.000215288		213.035	26.845	217.31	2.48259	217.932	1.34685	1.00287
15DC16-1 15	275.706	781.879	29.9391	0.35262		0.0513336	0.000624889	0.245861	0.0032954	0.0346953	0.000257197		257.47	27.775	223.208	2.69006	219.868	1.6068	0.985035
15DC16-1 16	156.274	467.426	17.9347	0.334328		0.0552182	0.00100123	0.266512	0.0052991	0.0348978	0.000257208		420.42	36.1075	239.901	4.25151	221.129	1.6066	0.921751
15DC16-1 17	373.446	1017.51	38.7113	0.36702		0.0506986	0.000584777	0.242151	0.00297038	0.0345942	0.000237841		227.845	21.2925	220.18	2.43272	219.238	1.48668	0.995719
15DC16-1 18	162.639	400.844	16.4535	0.40574		0.0501921	0.000796359	0.258116	0.00429142	0.0373568	0.000376221		211.185	37.0275	233.147	3.46709	236.429	2.34142	1.01407
15SM03-1 01	383.441	692.153	29.8484	0.553984		0.0555535	0.00149617	0.287381	0.00925705	0.037159	0.000468764		435.23	61.105	256.496	7.30331	235.199	2.91635	0.91697
15SM03-1 02	464.656	735.557	29.6533	0.631706		0.050467	0.000856183	0.230102	0.00406937	0.033019	0.000315681		216.74	38.88	210.283	3.36208	209.415	1.97321	0.995872
15SM03-1 03	287.105	529.971	22.9266	0.541737		0.0512585	0.000941786	0.25385	0.00508716	0.0359181	0.000460638		253.77	42.5875	229.699	4.1226	227.482	2.86914	0.990347
15SM03-1 04	289.851	501.452	20.5002	0.578023		0.0506348	0.00103846	0.237112	0.0050058	0.0338865	0.000312714		233.4	78.69	216.053	4.11123	214.827	1.95326	0.994328
15SM03-1 05	549.557	827.422	35.6704	0.66418		0.0586652	0.00129782	0.278178	0.00602802	0.0343946	0.000371297		553.74	52.7675	249.211	4.79165	217.994	2.31694	0.874736
15SM03-1 06	516.569	845.791	37.1335	0.610753		0.0563274	0.00142501	0.288416	0.0094725	0.0367499	0.000534715		464.86	55.55	257.311	7.4672	232.656	3.32718	0.904181
15SM03-1 07	608.037	902.603	37.004	0.673648		0.052139	0.000887767	0.237903	0.00410654	0.0330365	0.000294095		300.06	38.885	216.702	3.37159	209.525	1.83871	0.966882
15SM03-1 08	262.398	561.475	22.2695	0.467337		0.0502195	0.00099387	0.236151	0.0049014	0.0340489	0.000334955		205.63	41.6575	215.264	4.02871	215.839	2.09141	1.00267
15SM03-1 09	734.316	983.871	41.8659	0.746354		0.0545631	0.000952711	0.251993	0.00475385	0.0334242	0.000306528		394.495	38.885	228.194	3.85856	211.944	1.91552	0.928788
15SM03-1 10	578.565	852.304	36.3092	0.678825		0.0602985	0.00142338	0.284223	0.00796984	0.0339637	0.000372721		612.98	51.8425	254.002	6.30379	215.308	2.3267	0.847662
15SM03-1 11	793.166	882.899	41.1066	0.898366		0.0704941	0.00207063	0.344797	0.0119042	0.0350393	0.000412151		942.59	64.97	300.8	8.99057	222.011	2.56975	0.738067
15SM03-1 12	426.369	640.141	26.9433	0.666055		0.0560145	0.0015652	0.261376	0.00630323	0.0338494	0.000324986		453.75	65.735	235.775	5.07651	214.595	2.02971	0.91017
15SM03-1 13	454.468	942.748	37.8581	0.482067		0.0534611	0.000857821	0.250221	0.00474045	0.0338847	0.000358116		350.055	30.5525	226.755	3.8531	214.816	2.23592	0.947345
15SM03-1 14	815.426	988.919	43.3083	0.824562		0.0560499	0.00121981	0.266008	0.00678987	0.0342762	0.000373186		453.75	48.1425	239.497	5.44815	217.256	2.32894	0.907134
15SM03-1 15	642.059	875.849	36.6893	0.73307		0.0572842	0.00118237	0.271381	0.00671115	0.0341896	0.000347967		501.89	44.44	243.797	5.3624	216.716	2.17214	0.88892
15SM03-1 16	984.991	1216.43	50.5998	0.80974		0.0536284	0.000922697	0.240604	0.00407152	0.0325741	0.000267622		353.76	38.885	218.915	3.3357	206.639	1.6745	0.943923
15SM03-1 17	518.581	747.695	32.171	0.693573		0.0759594	0.00160812	0.344377	0.00772011	0.032816	0.000251082		1094.44	46.76	300.483	5.83444	208.149	1.57118	0.692715
15SM03-1 18	454.07	854.063	33.8686	0.531659		0.0510834	0.000895215	0.233837	0.00433879	0.033193	0.00030704		255.62	36.105	213.361	3.57354	210.501	1.91909	0.986595
15CT05-1 01	630.109	1415.28	56.3871	0.44522		0.0508944	0.000722633	0.239474	0.00337024	0.0340918	0.000208607		235.25	61.1025	217.99	2.76489	216.107	1.30566	0.991361
15CT05-1 02	1248.15	2560.67	106.604	0.487429		0.0510671	0.000612511	0.249138	0.00345297	0.0353434	0.00032698		242.66	27.7725	225.876	2.811	223.904	2.03948	0.99127
15CT05-1 03	396.239	1020.53	39.9585	0.388268		0.0501634	0.000782712	0.240011	0.00404117	0.034628	0.000265198		211.185	37.0275	218.429	3.31244	219.448	1.6566	1.00467
15CT05-1 04	511.743	1126.65	44.1703	0.454217		0.0485962	0.000755647	0.227201	0.00359411	0.0338677	0.000262443		127.865	32.405	207.885	2.97711	214.709	1.6405	1.03283
15CT05-1 05	926.976	1558.74	63.1234	0.594694		0.0490793	0.000757376	0.229333	0.00364964	0.0338213	0.000257183		150.085	32.405	209.648	3.01783	214.421	1.60784	1.02276
15CT05-1 06	830.818	2008.53	77.7126	0.413646		0.0479121	0.000750622	0.222497	0.00343717	0.033622	0.000246133		94.535	37.035	203.986	2.85822	213.177	1.53938	1.04506
15CT05-1 07	569.513	1267.61	48.7632	0.44928		0.0495947	0.000699291	0.22856	0.00326182	0.0333399	0.000229332		176.01	33.325	209.009	2.69958	211.418	1.43522	1.01152
15CT05-1 08	515.629	1361.52	52.3175	0.378717		0.0488333	0.000725939	0.229938	0.00344134	0.034084	0.000257953		138.975	35.1825	210.148	2.84461	216.058	1.61229	1.02812
15CT05-1 09	1317.4	1813.35	75.2149	0.726502		0.0530753	0.000791456	0.24451	0.00375434	0.0333123	0.000248478		331.54	33.33	222.106	3.06685	211.245	1.55435	0.951099
15CT05-1 10	1277.84	2142.43	86.9338	0.596443		0.0516453	0.000769904	0.24224	0.00378399	0.0339002	0.000264305		333.39	33.33	220.253	3.09658	214.912	1.65203	0.975751
15CT05-1 11	1857.74	3657.13	135.748	0.507977		0.0511109	0.000765042	0.222973	0.00333975	0.0315413	0.000234024		255.62	35.18	204.381	2.77634	200.188	1.46647	0.979482
15CT05-1 12	940.33	1010.23	43.8899	0.930811		0.0511343	0.000984506	0.236338	0.00448972	0.0334549	0.000293125		255.62	44.4375	215.418	3.69023	212.135	1.83202	0.984761
15CT05-1 13	892.603	1735.77	69.097	0.514239		0.0500588	0.000831962	0.235628	0.00394638	0.0340209	0.000291271		198.23	34.25	214.834	3.24625	215.665	1.8196	1.00387
15CT05-1 14	551.36	1280.99	49.0543	0.430416		0.0520468	0.000799657	0.237482	0.00375236	0.032948	0.000256691		287.1	33.33	216.356	3.08241	208.973	1.60592	0.965872
15CT05-1 15	764.113	1826.71	69.2772	0.4183		0.052187	0.000778149	0.23479	0.00342441	0.0325035	0.00022994		294.505	35.1825	214.145	2.8197	206.198	1.43994	0.962889
15CT05-1 16	722.18	1328.04	54.0775	0.543793		0.0498301	0.000766175	0.2508	0.00439183	0.0363184	0.000375293		187.12	41.6575	227.226	3.56858	229.972	2.33781	1.01209
15CT05-1 17	746.033	870.771	37.5506	0.85675		0.0506687	0.00085274	0.240256	0.00403517	0.0342579	0.000278783		233.4	38.88	218.63	3.30689	217.142	1.74157	0.993191
15CT05-1 18	444.741	1053.41	39.4801	0.422191		0.0532261	0.000821851	0.238013	0.0036935	0.0322493	0.000229117		338.945	35.1825	216.792	3.03289	204.611	1.4351	0.94381
Note: Locations and lithologies of samples are given in Table S3.

## Sheet: Table S2
TABLE S2. IN-SITU ZIRCON Hf ISOTOPES ANALYZED BY LA-MC-ICP-MS OF LATE TRIASSIC IGNEOUS ROCKS IN THE YIDUN TERRANE
Analysis	Age (Ma)	176Yb/177Hf	176Lu/177Hf	176Hf/177Hf	± 2σ	176Hf/177Hft	εHf(0)	εHf(t)	± 2σ
14CA01-1 01	213.875	0.024516	0.0009718	0.282519	1.3e-05	0.282515	-9.40644	-4.79225	0.459932
14CA01-1 02	219.557	0.02581	0.0010203	0.28257	1.4e-05	0.282566	-7.60295	-2.87205	0.495318
14CA01-1 03	213.737	0.03453	0.0013379	0.282588	1.4e-05	0.282583	-6.96642	-2.40586	0.495311
14CA01-1 04	217.318	0.0433	0.001646	0.282584	1.5e-05	0.282577	-7.10787	-2.51509	0.530695
14CA01-1 05	214.331	0.02319	0.000942	0.282549	1.4e-05	0.282545	-8.34556	-3.71679	0.495312
14CA01-1 06	221.192	0.02378	0.000911	0.282556	1.3e-05	0.282552	-8.09803	-3.31604	0.459939
14CA01-1 07	222.659	0.03476	0.001363	0.282556	1.4e-05	0.28255	-8.09803	-3.35085	0.495321
14CA01-1 08	213.529	0.03624	0.001341	0.28239	1.6e-05	0.282385	-13.9682	-9.41586	0.56607
14CA01-1 09	221.659	0.04343	0.00168	0.282584	1.5e-05	0.282577	-7.10787	-2.4281	0.5307
14CA01-1 10	226.614	0.03053	0.001234	0.282562	1.4e-05	0.282557	-7.88585	-3.03469	0.495325
14CA01-1 11	216.671	0.03095	0.0012057	0.282584	1.3e-05	0.282579	-7.10787	-2.46565	0.459935
14CA01-1 12	222.356	0.03233	0.0012347	0.282543	1.5e-05	0.282538	-8.55774	-3.79839	0.530701
14CA01-1 13	221.178	0.04046	0.001547	0.282596	1.5e-05	0.28259	-6.68352	-1.99425	0.530699
14CA01-1 14	220.739	0.04326	0.001615	0.282534	1.4e-05	0.282527	-8.876	-4.20707	0.495319
14CA01-1 15	219.206	0.05459	0.001982	0.282529	1.6e-05	0.282521	-9.05281	-4.46974	0.566077
14CA01-1 16	213.119	0.02321	0.0009225	0.28256	1.5e-05	0.282556	-7.95657	-3.35112	0.53069
14CA01-1 17	227.639	0.03229	0.001303	0.282579	1.3e-05	0.282573	-7.28469	-2.42161	0.459946
14CA01-1 18	216.623	0.03507	0.001361	0.282565	1.5e-05	0.282559	-7.77976	-3.16118	0.530694
14SLL02-1 01	227.345	0.02802	0.0010897	0.282393	2.1e-05	0.282388	-13.8621	-8.97658	0.742989
14SLL02-1 02	211.246	0.02955	0.001127	0.282551	1.5e-05	0.282547	-8.27484	-3.73868	0.530687
14SLL02-1 03	222.989	0.03529	0.001398	0.28259	1.4e-05	0.282584	-6.8957	-2.14605	0.495321
14SLL02-1 04	221.343	0.0464	0.001701	0.282558	1.4e-05	0.282551	-8.0273	-3.35775	0.495319
14SLL02-1 05	221.563	0.05916	0.002111	0.282525	1.6e-05	0.282516	-9.19426	-4.58077	0.56608
14SLL02-1 06	213.225	0.04727	0.001765	0.28248	1.6e-05	0.282473	-10.7856	-6.29806	0.566069
14SLL02-1 07	218.808	0.03887	0.001431	0.282532	1.7e-05	0.282526	-8.94673	-4.29214	0.601456
14SLL02-1 08	223.365	0.03754	0.001352	0.282443	1.7e-05	0.282437	-12.094	-7.3321	0.601462
14SLL02-1 09	215.5	0.022738	0.0009306	0.282589	2e-05	0.282585	-6.93106	-2.27467	0.70759
14SLL02-1 10	216.03	0.04741	0.001722	0.282444	1.6e-05	0.282437	-12.0586	-7.50639	0.566073
14SLL02-1 11	212.402	0.0263	0.000953	0.28238	1.8e-05	0.282376	-14.3218	-9.73919	0.636827
14SLL02-1 12	215.733	0.0456	0.0017	0.282585	1.3e-05	0.282578	-7.07251	-2.521	0.459934
14SLL02-1 13	219.844	0.02235	0.000905	0.282594	1.5e-05	0.28259	-6.75425	-1.99994	0.530698
14SLL02-1 14	225.016	0.02861	0.001141	0.282591	1.5e-05	0.282586	-6.86034	-2.02909	0.530704
14SLL02-1 15	216.204	0.02874	0.0010986	0.282583	1.4e-05	0.282579	-7.14324	-2.49575	0.495314
14SLL02-1 16	214.317	0.0588	0.002101	0.282538	1.6e-05	0.28253	-8.73455	-4.27067	0.566071
14SLL02-1 17	218.332	0.02819	0.0010461	0.28239	1.6e-05	0.282386	-13.9682	-9.27059	0.566076
14SLL02-1 18	215.935	0.0707	0.002523	0.28252	1.9e-05	0.28251	-9.37108	-4.93402	0.672211
14SLL02-1 19	219.829	0.0496	0.001825	0.28257	1.7e-05	0.282562	-7.60295	-2.98326	0.601457
14SLL02-1 20	222.448	0.0457	0.001674	0.282538	1.6e-05	0.282531	-8.73455	-4.03801	0.566081
14SLL02-1 21	222.602	0.03424	0.001304	0.282571	1.6e-05	0.282566	-7.56759	-2.81269	0.566081
14SLL02-1 22	228.038	0.02834	0.001147	0.282585	1.5e-05	0.28258	-7.07251	-2.17724	0.530707
14SLL02-1 23	223.232	0.05394	0.002006	0.28253	1.6e-05	0.282522	-9.01745	-4.3535	0.566082
14SLL10-2 01	212.472	0.03277	0.001307	0.282474	2.5e-05	0.282469	-10.9978	-6.46181	0.884482
14SLL10-2 02	212.06	0.0407	0.001647	0.282493	1.6e-05	0.282486	-10.3259	-5.84614	0.566068
14SLL10-2 03	210.154	0.0559	0.002116	0.282525	1.7e-05	0.282517	-9.19426	-4.8196	0.601444
14SLL10-2 05	212.614	0.06145	0.00219	0.2824	1.8e-05	0.282391	-13.6146	-9.20109	0.636827
14SLL10-2 06	212.349	0.02336	0.0009145	0.282379	1.6e-05	0.282375	-14.3572	-9.77032	0.566068
14SLL10-2 07	210.504	0.03071	0.0011087	0.282352	1.8e-05	0.282348	-15.312	-10.7925	0.636824
14SLL10-2 08	235.97	0.0492	0.001939	0.282459	1.8e-05	0.28245	-11.5282	-6.58824	0.63686
14SLL10-2 09	207.028	0.03676	0.00136	0.28253	1.5e-05	0.282525	-9.01745	-4.60436	0.530683
14SLL10-2 10	214.697	0.0622	0.00243	0.282541	1.8e-05	0.282531	-8.62846	-4.20334	0.63683
14SLL10-2 11	215.929	0.0472	0.001849	0.282587	1.7e-05	0.28258	-7.00179	-2.46739	0.601452
14SLL10-2 16	211.782	0.02367	0.000938	0.282388	2.6e-05	0.282384	-14.0389	-9.46748	0.919859
14SLL10-2 18	210.301	0.0266	0.001075	0.282407	1.6e-05	0.282403	-13.367	-8.84638	0.566065
14SLL15-1 01	202.42	0.0465	0.001721	0.282565	1.5e-05	0.282558	-7.77976	-3.51292	0.530677
14SLL15-1 02	215.75	0.0715	0.002733	0.282563	1.6e-05	0.282552	-7.85049	-3.4465	0.566072
14SLL15-1 03	212.25	0.0342	0.001316	0.28253	1.6e-05	0.282525	-9.01745	-4.48658	0.566068
14SLL15-1 04	209.827	0.0255	0.0010065	0.282545	1.4e-05	0.282541	-8.48701	-3.96477	0.495307
14SLL15-1 05	231.073	0.02111	0.0007832	0.282385	1.4e-05	0.282382	-14.145	-9.1324	0.49533
14SLL15-1 06	215.366	0.03434	0.001367	0.282535	1.4e-05	0.282529	-8.84064	-4.25028	0.495313
14SLL15-1 07	206.189	0.02668	0.0009847	0.282378	1.4e-05	0.282374	-14.3926	-9.94864	0.495303
14SLL15-1 08	208.747	0.03907	0.0014112	0.282434	1.5e-05	0.282428	-12.4123	-7.97108	0.530685
14SLL15-1 09	205.09	0.02025	0.000752	0.282388	1.5e-05	0.282385	-14.0389	-9.58702	0.53068
14SLL15-1 10	222.908	0.04044	0.001457	0.282395	1.8e-05	0.282389	-13.7914	-9.0556	0.636842
14SLL15-1 11	212.422	0.02414	0.000921	0.282413	2.3e-05	0.282409	-13.1549	-8.56675	0.813723
14SLL15-1 12	219.527	0.03028	0.001194	0.282423	1.4e-05	0.282418	-12.8012	-8.09878	0.495317
14SLL15-1 14	209.849	0.02416	0.0009139	0.282405	1.5e-05	0.282401	-13.4378	-8.9045	0.530686
14SLL15-1 16	212.008	0.02301	0.0008985	0.282467	1.5e-05	0.282463	-11.2453	-6.66208	0.530688
14SLL15-1 17	208.376	0.04338	0.001723	0.282597	1.4e-05	0.28259	-6.64816	-2.25523	0.495305
14SLL15-1 18	212.727	0.04072	0.001533	0.282504	1.6e-05	0.282498	-9.93688	-5.42679	0.566069
14SLL15-1 19	222.027	0.03423	0.001272	0.282486	1.5e-05	0.282481	-10.5734	-5.82759	0.5307
14SLL15-1 20	213.483	0.02168	0.000857	0.282401	1.6e-05	0.282398	-13.5792	-8.95928	0.566069
14SLL15-1 21	219.386	0.03978	0.001538	0.282468	1.5e-05	0.282462	-11.2099	-6.55966	0.530697
14SLL15-1 22	209.49	0.03345	0.00137	0.282532	1.4e-05	0.282527	-8.94673	-4.48238	0.495306
14SLL15-1 23	216.951	0.02383	0.000897	0.28229	1.5e-05	0.282286	-17.5045	-12.8169	0.530694
14LT04-1 01	216.399	0.05874	0.002537	0.282639	1.8e-05	0.282629	-5.16293	-0.716303	0.636832
14LT04-1 02	220.463	0.0769	0.003231	0.282714	2.2e-05	0.282701	-2.51074	1.91963	0.778358
14LT04-1 03	226.015	0.0462	0.002063	0.282673	2.4e-05	0.282664	-3.96061	0.755651	0.849128
14LT04-1 04	224.017	0.0315	0.001408	0.282651	1.9e-05	0.282645	-4.73858	0.0326154	0.672223
14LT04-1 05	220.701	0.01498	0.000705	0.282628	2.1e-05	0.282625	-5.55192	-0.749242	0.742978
14LT04-1 06	225.188	0.0466	0.002055	0.282651	2.1e-05	0.282642	-4.73858	-0.0388282	0.742986
14LT04-1 07	217.711	0.0381	0.001697	0.282686	1.9e-05	0.282679	-3.50089	1.0946	0.672214
14LT04-1 08	223.893	0.0591	0.002544	0.282668	1.7e-05	0.282657	-4.13742	0.463059	0.601463
14LT04-1 09	226.962	0.0215	0.000957	0.282661	2e-05	0.282657	-4.38496	0.517056	0.707608
14LT04-1 12	216.948	0.0649	0.0026	0.282682	1.6e-05	0.282671	-3.64234	0.807283	0.566074
14LT04-1 13	210.96	0.06978	0.002981	0.282653	2.4e-05	0.282641	-4.66786	-0.395018	0.849099
14LT04-1 14	216.658	0.0413	0.001763	0.282659	1.9e-05	0.282652	-4.45568	0.10761	0.672212
14LT04-1 15	216.948	0.067	0.002835	0.28267	2.3e-05	0.282658	-4.06669	0.348986	0.813731
14LT04-1 16	219.045	0.05265	0.002314	0.282674	2.3e-05	0.282665	-3.92524	0.608826	0.813735
14LT04-1 17	218.678	0.0998	0.003817	0.282683	1.9e-05	0.282667	-3.60698	0.702079	0.672215
14LT04-1 18	219.72	0.08773	0.003601	0.282672	2.2e-05	0.282657	-3.99597	0.364897	0.778356
15DC09-2 03	216.611	0.0702	0.0027	0.282401	1.8e-05	0.28239	-13.5792	-9.15566	0.636833
15DC09-2 06	226.081	0.01838	0.0006797	0.282411	1.9e-05	0.282408	-13.2256	-8.30561	0.672226
15DC09-2 08	191.489	0.03633	0.001336	0.282474	1.5e-05	0.282469	-10.9978	-6.91442	0.530664
15DC09-2 12	211.756	0.03437	0.001312	0.282445	1.6e-05	0.28244	-12.0233	-7.50383	0.566067
15DC09-2 18	219.903	0.03136	0.001137	0.282422	1.5e-05	0.282417	-12.8366	-8.11777	0.530698
15DC14-1 02	221.373	0.02317	0.000889	0.282428	1.9e-05	0.282424	-12.6244	-7.83753	0.672219
15DC14-1 04	226.489	0.02206	0.000835	0.282407	1.6e-05	0.282403	-13.367	-8.4615	0.566086
15DC14-1 06	216.768	0.02131	0.000819	0.282439	1.7e-05	0.282436	-12.2354	-7.53814	0.601453
15DC14-1 08	224.916	0.03319	0.001274	0.282442	2e-05	0.282437	-12.1294	-7.32272	0.707605
15DC14-1 10	224.952	0.0288	0.001028	0.282473	1.8e-05	0.282469	-11.0331	-6.18852	0.636844
15DC14-1 12	235.826	0.0239	0.0008831	0.282402	1.7e-05	0.282398	-13.5439	-8.44313	0.601479
15DC14-1 15	213.619	0.02868	0.0011019	0.282377	1.8e-05	0.282373	-14.4279	-9.84005	0.636828
15DC16-1 01	215.578	0.04003	0.001492	0.282358	1.9e-05	0.282352	-15.0998	-10.5258	0.672211
15DC16-1 02	214.309	0.02658	0.0010314	0.282474	1.5e-05	0.28247	-10.9978	-6.3834	0.530691
15DC16-1 03	219.527	0.0326	0.001233	0.282488	1.7e-05	0.282483	-10.5027	-5.80475	0.601457
15DC16-1 04	216.128	0.0548	0.00204	0.282464	1.8e-05	0.282456	-11.3514	-6.84222	0.636832
15DC16-1 05	219.087	0.02683	0.0010197	0.282523	1.5e-05	0.282519	-9.26499	-4.54496	0.530697
15DC16-1 06	220.389	0.02925	0.00113	0.282511	1.5e-05	0.282506	-9.68934	-4.95749	0.530698
15DC16-1 07	222.178	0.02339	0.000923	0.282509	1.6e-05	0.282505	-9.76007	-4.95929	0.56608
15DC16-1 08	219.324	0.02334	0.000924	0.282489	1.5e-05	0.282485	-10.4673	-5.72885	0.530697
15DC16-1 09	224.653	0.0338	0.0013155	0.282527	1.5e-05	0.282521	-9.12354	-4.3272	0.530703
15DC16-1 10	211.717	0.04227	0.0015818	0.282509	1.5e-05	0.282503	-9.76007	-5.2782	0.530688
15DC16-1 11	214.687	0.02134	0.000831	0.282422	1.7e-05	0.282419	-12.8366	-8.18651	0.60145
15DC16-1 12	217.984	0.0572	0.002095	0.282527	1.6e-05	0.282518	-9.12354	-4.5824	0.566075
15DC16-1 14	217.932	0.02035	0.000788	0.282502	1.6e-05	0.282499	-10.0076	-5.27945	0.566075
15DC16-1 15	219.868	0.02568	0.00102	0.282515	1.6e-05	0.282511	-9.54789	-4.81118	0.566078
15DC16-1 16	221.129	0.041154	0.0015418	0.282478	2e-05	0.282472	-10.8563	-6.16937	0.707599
15DC16-1 17	219.238	0.02253	0.000924	0.282556	1.9e-05	0.282552	-8.09803	-3.36029	0.672216
15SM03-1 01	235.199	0.02306	0.00103	0.282612	2e-05	0.282607	-6.11772	-1.04959	0.707621
15SM03-1 02	209.415	0.0376	0.001536	0.282634	2e-05	0.282628	-5.33975	-0.898321	0.70758
15SM03-1 03	227.482	0.01506	0.000662	0.282611	1.7e-05	0.282608	-6.15308	-1.19629	0.601468
15SM03-1 04	214.827	0.0382	0.00159	0.282606	1.9e-05	0.2826	-6.3299	-1.78156	0.67221
15SM03-1 05	217.994	0.0417	0.001749	0.28258	1.6e-05	0.282573	-7.24932	-2.65716	0.566075
15SM03-1 06	232.656	0.01948	0.000834	0.282583	1.8e-05	0.282579	-7.14324	-2.10039	0.636855
15SM03-1 07	209.525	0.0467	0.001936	0.282603	2.2e-05	0.282595	-6.43598	-2.04821	0.778339
15SM03-1 08	215.839	0.0278	0.001211	0.282601	2e-05	0.282596	-6.50671	-1.88283	0.707591
15SM03-1 09	211.944	0.0577	0.00234	0.282599	2.1e-05	0.28259	-6.57744	-2.19562	0.742964
15SM03-1 10	215.308	0.0523	0.002144	0.282584	2.3e-05	0.282575	-7.10787	-2.62865	0.813728
15SM03-1 12	214.595	0.0453	0.00189	0.282569	2e-05	0.282561	-7.63831	-3.13813	0.707589
15SM03-1 13	214.816	0.0365	0.001499	0.282577	1.9e-05	0.282571	-7.35541	-2.79487	0.67221
15SM03-1 14	217.256	0.0662	0.00264	0.282613	2.1e-05	0.282602	-6.08236	-1.63334	0.742972
15SM03-1 15	216.716	0.0465	0.001887	0.282576	2e-05	0.282568	-7.39077	-2.84546	0.707592
15SM03-1 16	206.639	0.0917	0.003568	0.282602	2.1e-05	0.282588	-6.47135	-2.36735	0.742955
15SM03-1 18	210.501	0.0377	0.001519	0.282579	1.9e-05	0.282573	-7.28469	-2.81872	0.672203
15CT05-1 01	216.107	0.04143	0.001695	0.282531	1.8e-05	0.282524	-8.98209	-4.42288	0.636832
15CT05-1 02	223.904	0.02926	0.001153	0.282499	1.6e-05	0.282494	-10.1137	-5.30979	0.566083
15CT05-1 03	219.448	0.03757	0.001453	0.282471	1.9e-05	0.282465	-11.1038	-6.43985	0.672216
15CT05-1 04	214.709	0.03715	0.001484	0.282529	1.8e-05	0.282523	-9.05281	-4.49321	0.63683
15CT05-1 05	214.421	0.02299	0.0009216	0.282518	1.5e-05	0.282514	-9.4418	-4.80872	0.530691
15CT05-1 06	213.177	0.0781	0.00299	0.282538	1.7e-05	0.282526	-8.73455	-4.4199	0.601448
15CT05-1 07	211.418	0.03166	0.001271	0.282518	1.6e-05	0.282513	-9.4418	-4.92265	0.566067
15CT05-1 07	211.418	0.03166	0.001271	0.282518	1.6e-05	0.282513	-9.4418	-4.92265	0.566067
15CT05-1 08	216.058	0.02494	0.000984	0.28246	1.7e-05	0.282456	-11.4928	-6.83419	0.601452
15CT05-1 09	211.245	0.0412	0.001593	0.28252	1.8e-05	0.282514	-9.37108	-4.90061	0.636825
15CT05-1 10	214.912	0.02945	0.0011767	0.282509	1.7e-05	0.282504	-9.76007	-5.15277	0.601451
15CT05-1 11	200.188	0.048	0.001832	0.282513	1.6e-05	0.282506	-9.61861	-5.41446	0.566053
15CT05-1 12	212.135	0.0363	0.001438	0.282347	2.1e-05	0.282341	-15.4888	-10.9806	0.742964
15CT05-1 13	215.665	0.04399	0.00172	0.282537	1.8e-05	0.28253	-8.76991	-4.22352	0.636831
15CT05-1 14	208.973	0.03075	0.001277	0.282513	1.5e-05	0.282508	-9.61861	-5.15277	0.530685
15CT05-1 15	206.198	0.03362	0.00129	0.282501	1.7e-05	0.282496	-10.043	-5.63852	0.601439
15CT05-1 16	229.972	0.0256	0.000961	0.282424	2.2e-05	0.28242	-12.7659	-7.80357	0.778374
15CT05-1 17	217.142	0.01848	0.000743	0.282479	1.9e-05	0.282476	-10.8209	-6.10391	0.672213
15CT05-1 18	204.611	0.026388	0.0011058	0.282493	1.7e-05	0.282489	-10.3259	-5.9306	0.601437
Note: Locations and lithologies of samples are given in Table S3.

## Sheet: Table S3
TABLE S3. WHOLE-ROCK MAJOR AND TRACE ELEMENT CONCENTRATIONS OF LATE TRIASSIC IGNEOUS ROCKS IN THE YIDUN TERRANE
Igneous bodies		Cuo'a pluton								Shaluli batholith												Shaluli batholith		Dongcuo batholith											Maxiongou pluton			Shengmu batholith				Shengmu batholith
Sample ID		14CA01-1	14CA01-2	14CA02-1	14CA02-2	14CA03-1	14CA04-1	14CA05-1		14SLL02-1	14SLL03-1	14SLL07-1	14SLL08-1	14SLL09-1	14SLL10-2	14SLL11-1	14SLL12-2	14SLL12-3	14SLL12-4	14SLL15-1		14SLL16-2		15DC09-2	15DC14-1	15DC15-2	15DC16-1	14LT02-2	14LT03-2	14LT04-1	14LT04-2	14LT06-1	14LT07-1		15MXG01-1	15MXG02-1		15SM01-1	15SM02-1	15SM03-1		15SM03-2	15SM03-3	15SM04-1	15SM04-2	15SM05-1	15SM08-1	15SM08-2	15SM09-1
Longitude		99.3905	99.3905	99.3924	99.3924	99.395	99.4055	99.4125		99.7706	99.7773	99.8278	99.8439	99.8519	99.8624	99.8672	99.9265	99.9265	99.9265	99.9106		99.9124		100.313	100.266	100.194	100.185	99.9203	99.933	99.9539	99.9539	99.9821	99.999		99.9734	99.961		100.567	100.565	100.563		100.563	100.563	100.557	100.557	100.553	100.538		100.529
Latitude		31.7894	31.7894	31.7906	31.7906	31.7931	31.7991	31.804		31.1495	31.1588	31.2102	31.2197	31.2294	31.2444	31.2597	31.2716	31.2716	31.2716	31.3285		31.3427		29.5691	29.5141	29.4601	29.4378	30.2073	30.1977	30.1838	30.1838	30.1716	30.1648		29.1301	29.1425		29.0516	29.049	29.0472		29.0472	29.0472	29.0447	29.0447	29.0433	29.0381		29.0381
Lithology		Granodiorite	Dioritic enclave	Granodiorite	Granodiorite	Granodiorite	Granodiorite	Granodiorite		Monzogranite	Monzogranite	Monzogranite	Monzogranite	Monzogranite	Dioritic enclave	Monzogranite	Dioritic enclave	Dioritic enclave	Dioritic enclave	Monzogranite		Dioritic enclave		Monzogranite	Monzogranite	Dioritic enclave	Monzogranite	Dioritic enclave	Dioritic enclave	Dioritic enclave	Dioritic enclave	Dioritic enclave	Dioritic enclave		Monzogranite	Monzogranite		Granodiorite	Diorite	Hornblende gabbro		Hornblende gabbro	Granodiorite	Granodiorite	Diorite	Quartz diorite	Quartz diorite	Granodiorite	Monzogranite
Major elements (wt.%)
SiO2		69.23	57.4	67.44	66.93	66.73	67.56	68.12		71.74	73.23	70.53	73.55	76.13	62.88	73.61	61.12	60.56	60.73	70.2		56.41		72.408	73.79	54.586	70.832	55.38	61.32	51.47	64.35	60.6	61.79		73.097	74.746		61.334	56.779	52.797		53.972	63.093	61.439	52.736	60.483	60.467	64.515	76.105
TiO2		0.413	0.5976	0.5172	0.5049	0.4976	0.481	0.4578		0.2765	0.2687	0.3362	0.2618	0.2011	0.6954	0.2571	0.5843	0.6033	0.6191	0.3933		0.8803		0.301	0.254	0.701	0.421	0.9669	0.9894	1.0027	0.8103	0.6834	0.6709		0.278	0.188		0.676	1.154	0.763		0.772	0.648	0.642	0.577	0.708	0.805	0.562	0.047
Al2O3		14.2	15.26	14.08	14.2	14.52	14.36	14.05		14.25	13.24	14.42	13.02	11.73	15.57	13.07	15.46	15.85	15.61	14.31		16.49		13.567	13.758	16.298	14.738	16.79	15.71	16.46	15.22	16.62	16.27		13.401	13.461		16.161	18.184	18.311		18.464	16.635	16.769	17.658	16.538	16.467	15.466	13.07
TFe2O3		4.43	9.95	5.51	5.48	5.41	5.04	4.83		2.71	2.47	3.06	2.53	1.94	7.41	2.51	7.79	7.9	8.17	3.41		10.37		2.863	2.15	9.124	3.316	9.17	7.72	10.08	6.62	6.68	6.19		2.488	1.651		5.777	7.201	7.787		7.503	5.33	5.38	8.533	6.081	6.58	5.071	0.815
MnO		0.0882	0.283	0.1025	0.1084	0.1031	0.0926	0.09		0.058	0.0467	0.0698	0.0604	0.0519	0.2115	0.0687	0.2437	0.2472	0.2602	0.0718		0.278		0.056	0.046	0.277	0.062	0.1889	0.1473	0.1821	0.1152	0.1267	0.1193		0.058	0.05		0.103	0.125	0.135		0.13	0.089	0.095	0.195	0.099	0.112	0.091	0.024
MgO		1.51	3.77	1.89	2.02	1.81	1.66	1.58		0.58	0.51	0.89	0.59	0.47	1.59	0.6	2.53	2.6	2.71	1.04		3.27		0.61	0.492	4.087	1.119	3.24	2.03	6.15	1.88	3.14	2.88		0.725	0.472		3.185	3.434	5.1		4.851	2.854	2.896	5.203	3.384	3.465	2.613	0.106
CaO		3.58	6.75	3.28	3.27	4.18	4.11	4.04		2.38	2.53	2.95	2.1	1.83	3.5	2.28	4.75	4.95	4.93	3.03		5.38		1.796	1.862	8.276	3.114	6.59	5.67	9.42	3.95	6.83	6.39		1.414	1.498		5.845	7.805	9.21		9.082	5.355	6.265	9.05	6.166	6.145	5.1	0.97
Na2O		2.65	3.2	2.56	2.82	2.75	2.64	2.7		3.35	3.2	2.95	2.93	2.63	3.94	2.96	3.97	4.1	4.08	2.85		3.84		2.701	2.839	3.917	3.32	3.18	3.17	2.32	3.25	3.23	3.17		3.226	3.412		2.689	2.488	2.374		2.424	2.617	2.893	3.345	2.547	2.696	2.861	2.785
K2O		3.23	1.56	3.33	2.86	2.92	2.93	2.69		3.85	3.04	4.01	4.04	3.63	2.68	3.67	1.72	1.66	1.69	3.85		2.28		4.731	4.88	2.493	3.278	2.66	2.52	0.77	3.08	1.39	1.87		4.601	4.445		2.627	1.76	1.615		1.479	3.3	2.264	1.385	2.576	2.332	2.684	5.594
P2O5		0.0736	0.1173	0.0889	0.0837	0.091	0.0851	0.0846		0.0548	0.0502	0.0713	0.0534	0.0441	0.1814	0.0559	0.1476	0.1469	0.1446	0.0823		0.1691		0.066	0.06	0.091	0.081	0.1929	0.151	0.1153	0.1526	0.1316	0.1337		0.083	0.059		0.211	0.353	0.224		0.267	0.186	0.206	0.167	0.234	0.222	0.147	0.017
LOI		0.839496	0.9996	1.35918	1.67866	0.9	0.759696	0.719424		0.359712	0.639872	0.41958	0.4999	0.559441	0.819508	0.419916	1.35973	1.45912	1.07978	0.379772		0.619876		0.69	0.46	0.53	0.51	0.79984	0.379696	1.43914	0.59964	0.639616	0.579652		0.45	0.38		0.69	0.86	1.06		1.15	0.59	0.67	0.96	0.81	1.05	0.5	0.33
Total		100.244	99.8875	100.158	99.9557	99.9117	99.7184	99.3618		99.609	99.2255	99.7069	99.6355	99.2165	99.4778	99.5016	99.6753	100.077	100.024	99.6172		99.9873		99.789	100.591	100.38	100.791	99.1585	99.8074	99.4092	100.028	100.071	100.064		99.821	100.362		99.298	100.143	99.376		100.094	100.697	99.519	99.809	99.626	100.341	99.61	99.863
Mg#		40.3076	42.877	40.4593	42.2045	39.8601	39.4852	39.322		29.7747	29.0298	36.5557	31.5998	32.4299	29.8286	32.137	39.1503	39.4669	39.6542	37.6632		38.4497		29.6809	31.1928	47.0167	40.0664	41.1749	34.2504	54.724	36.0038	48.219	47.9631		36.5995	36.1575		52.2034	48.5786	56.4737		56.1563	51.4744	51.6061	54.709	52.4359	51.0574	50.5146	20.4871
A/CNK		0.988698	0.793861	1.02198	1.03816	0.950133	0.95831	0.956015		1.01763	1.00665	0.990753	1.00085	1.01287	0.988978	1.00654	0.908004	0.903709	0.891895	0.996352		0.888286		1.05766	1.03167	0.673871	1.00469	0.835775	0.860883	0.755949	0.959676	0.864126	0.862938		1.04241	1.02399		0.903279	0.900835	0.817621		0.835557	0.944603	0.90167	0.752916	0.909367	0.908318	0.916138	1.05421
Trace elements (ppm)
Li		37.2838	24.7661	34.3106	40.4331	32.6404	38.0826	37.6025		32.1508	28.3486	25.2196	42.8042	28.2847	53.2001	20.7059	23.7617	23.0706	22.4653	36.3684		60.7376		50.4792	34.56	38.434	33.698	34.8543	27.2964	9.45666	42.1529	17.3503	16.471		49.3456	38.902		30.5078	22.1862	25.3979		24.6473	26.9448	21.2333	19.1076	28.6985	32.8611	29.6525	9.04889
Be		1.32346	2.21811	1.32923	1.47064	1.63262	1.50878	1.50006		2.2991	1.78886	1.99721	1.49634	1.77294	4.921	1.60137	2.94248	2.83882	2.71879	1.90082		3.84044		2.13646	2.14864	2.58089	2.28157	1.59386	1.85384	0.814241	2.12378	1.62776	1.5112		3.10565	3.42325		2.09859	1.95106	1.47125		1.5342	1.75017	1.83837	2.43147	1.90088	1.77811	1.9518	3.48243
Sc		15.0478	33.582	19.7696	19.305	20.3457	16.0266	16.1525		8.25338	5.55873	8.81719	6.79893	4.96756	20.1938	5.95046	17.493	17.0668	18.1344	10.858		26.8014		7.89564	7.24059	22.748	8.4149	26.6282	22.9002	39.5947	19.4193	19.6647	22.7417		5.55374	3.77756		18.4794	20.8609	26.2849		24.9467	16.5487	18.7954	32.8809	18.1512	20.9652	17.1849	3.02148
V		66.4432	156.474	88.1219	90.8472	87.1216	76.9185	73.7293		27.1211	22.1421	39.9664	26.3749	20.2751	74.0858	27.6627	150.54	153.988	161.946	48.9305		238.534		26.6127	20.7884	107.379	38.3637	231.567	91.3989	331.185	74.6668	162.421	151.882		23.444	15.9011		137.374	143.112	213.907		191.633	119.846	131.154	202.132	142.689	153.048	112.813	1.897
Cr		8.88051	27.9366	11.4618	11.7043	12.3746	11.7314	11.6067		3.09179	2.82148	10.3742	4.82215	5.10113	1.36238	4.46359	16.5109	17.9972	18.5983	11.6623		2.50313		7.37959	18.1706	26.9089	14.3604	6.62555	1.36703	15.5411	15.0579	23.2703	26.3656		7.79769	4.40237		31.9068	37.0196	47.9041		44.3158	26.2157	27.14	43.3991	35.037	30.5277	32.0031	0.953337
Co		9.52395	19.988	11.9893	12.2571	11.2871	10.8615	10.1775		3.38305	3.14044	4.93637	3.37988	2.51434	9.39666	3.41377	12.2365	12.4516	12.8283	5.66039		16.957		3.67922	2.91056	16.6393	6.45009	17.1206	15.0891	28.7717	11.7383	16.6452	15.7797		3.5627	2.44131		14.0023	16.7792	20.6667		19.0718	12.2688	12.9292	19.3765	14.3173	15.877	11.7231	0.563453
Ni		4.35777	7.48118	5.19624	4.85228	5.04554	4.38313	4.23956		1.81886	1.83964	3.8361	1.84928	1.89617	2.47392	2.09861	7.37115	7.54487	7.96528	4.66005		6.00961		3.17684	2.73181	13.1746	5.96656	6.19668	1.84801	12.0009	6.46556	16.152	16.5632		5.19216	3.1453		11.8735	16.0564	15.7997		14.8411	10.3246	10.4535	11.9032	14.3554	11.8203	10.7741	0.845243
Cu		12.6592	6.51489	38.7933	23.6345	4.34436	5.59874	3.49661		1.10606	0.972222	2.97971	1.08296	0.969682	2.18682	5.8684	6.78198	6.30342	7.9891	1.61825		9.30321		0.791859	1.23052	16.0287	1.90067	35.3628	24.0606	11.4657	4.06019	27.2041	24.8502		1.04507	0.663504		16.6669	15.7115	19.2595		13.5411	11.7316	9.76971	19.2254	14.0952	13.1045	7.88225	0.965894
Zn		50.6106	96.1221	59.4936	61.2047	57.5732	56.8839	53.7913		32.9962	28.1683	37.3788	30.1689	28.5055	89.922	36.6161	111.012	114.096	118.491	38.4992		120.837		44.4134	31.6763	100.811	40.7566	96.3466	82.1721	72.2194	81.2622	62.8485	60.2068		29.029	21.235		60.2369	72.5134	64.2017		61.6149	54.2263	54.9887	78.4439	59.7148	67.171	53.0632	13.1201
Ga		15.0767	18.2999	16.0892	16.0352	17.1283	16.1955	16.128		15.8237	15.191	15.2618	13.7852	12.6057	21.3849	14.1574	18.7259	19.008	18.6951	16.2418		22.8005		15.5115	15.3958	18.1184	16.7395	19.7637	18.8522	16.8438	20.1044	17.6833	17.1698		15.0325	14.627		17.9475	19.1921	18.8287		19.3302	17.084	18.1993	19.0306	18.1234	18.5451	16.9676	14.3789
Rb		118.871	76.1981	132.657	114.918	116.837	116.274	110.149		139.225	115.216	147.562	156.403	144.316	246.536	144.439	160.237	160.662	164.031	156.077		193.528		211.578	186.068	153.305	141.844	131.016	111.262	26.9247	150.978	56.2769	61.3532		276.211	232.788		99.5623	67.6582	55.1309		48.8517	108.389	82.1821	60.5412	101.014	95.4746	107.519	186.096
Sr		150.796	163.982	144.364	167.229	169.393	156.215	152.137		179.136	178.391	184.695	131.408	120.919	151.915	146.674	183.899	193.408	186.337	184.039		134.067		129.236	123.124	116.479	144.183	254.58	200.46	287.596	169.195	267.403	269.017		116.138	108.79		445.511	416.133	686.532		671.293	441.24	453.591	384.851	412.651	435.264	352.431	67.7596
Y		24.8124	64.7675	32.5839	30.5458	34.5202	28.0462	29.198		35.2111	19.034	24.8759	23.3817	17.7045	70.7573	19.4281	42.9314	37.1492	39.8574	28.1113		65.426		19.0718	33.1853	24.5333	27.456	30.7631	43.519	21.8662	48.1323	27.2676	32.8462		26.5047	24.9597		27.1057	25.2125	22.8505		26.3414	19.8696	23.8256	48.5208	21.3968	23.786	22.7558	47.1317
Zr		111.19	110.852	132.12	126.064	135.804	144.864	132.091		148.816	170.743	158.119	125.811	120.846	161.118	127.106	116.303	108.4	116.932	169.601		113.686		138.027	130.717	98.9195	168.745	117.829	129.694	77.7027	271.701	112.159	149.829		167.619	123.116		161.13	160.65	121.539		151.251	176.382	188.386	109.902	161.017	181.411	177.682	59.4226
Nb		6.21597	8.8844	7.98378	7.92166	8.49563	7.75617	7.5791		9.05216	8.23709	8.18364	7.6565	6.56204	21.738	7.10168	10.9594	10.2399	10.6085	9.06845		19.0299		11.8785	9.90556	8.84957	11.1466	10.9632	16.1478	4.99996	18.264	8.4632	8.90538		17.5868	14.0528		12.1865	12.7448	8.70211		9.38263	10.9622	10.9575	11.1368	11.2482	12.8294	11.539	8.97341
Sn		2.30139	2.57257	2.84515	2.04656	1.90562	2.20362	2.41938		2.09901	1.79861	2.27779	2.35987	2.33272	8.00035	2.79488	11.9411	11.9508	12.4334	3.14273		5.72769		6.27761	2.46787	6.15326	2.88988	5.10657	1.81966	2.36131	3.69521	5.53602	3.31528		3.54442	2.73224		1.91292	1.39449	0.804829		0.809785	1.77722	1.72212	2.76703	1.73292	2.07906	3.12501	3.92558
Cs		4.4845	3.70588	5.66181	3.70976	5.25534	6.14663	5.49815		3.33059	3.29278	4.42162	3.22549	3.34285	15.4809	4.55435	14.0157	14.0525	13.4933	5.87729		12.3581		8.32417	3.61794	6.44641	4.67162	5.07523	3.21348	0.886175	4.79905	2.91393	2.72398		10.1692	6.44559		3.24639	3.42545	2.59825		3.26914	3.43242	2.76964	2.29413	3.25235	4.42446	5.75061	6.38766
Ba		679.779	294.674	698.913	536.093	642.477	624.647	561.406		1288.29	1053.16	940.115	769.768	645.793	410.808	729.814	504.602	437.778	455.292	911.655		495.188		536.905	581.342	720.41	543.543	775.217	629.823	191.766	779.214	483.478	613.729		503.37	361.196		853.61	476.676	637.652		637.797	1281.79	827.906	373.976	951.395	751.861	688.348	198.165
La		21.9723	15.8837	30.7353	26.8195	28.4012	48.9692	20.9307		38.8285	43.3883	38.9856	37.5411	29.3541	10.6252	35.7936	20.7779	28.5794	33.4529	41.3658		16.3308		36.3379	32.7375	9.74239	56.0158	14.8309	14.9913	10.9806	65.2621	18.1853	20.7099		39.7364	31.7954		27.1182	22.8562	29.934		31.4067	23.1513	18.8411	24.7336	27.4466	22.5142	31.8932	27.3934
Ce		42.4988	48.6824	58.9781	52.3071	56.8364	88.0711	42.32		60.8527	79.5544	73.4798	68.9851	54.7912	28.5827	64.0261	39.5681	51.0097	60.2746	78.6898		31.4671		72.0599	66.1169	21.7628	103.846	35.3506	38.009	26.4964	127.239	42.5324	47.9241		77.6902	58.4103		54.5233	50.1807	60.0807		64.7386	47.1335	39.6357	60.398	54.2623	48.8418	60.724	55.9796
Pr		4.75315	7.32684	6.44605	5.83294	6.48856	8.80234	4.83811		7.68691	8.15214	7.76333	7.06013	5.58905	4.01219	6.49333	4.5542	5.44894	6.38607	8.35296		5.68634		7.72415	7.62139	3.27895	11.179	4.84834	5.45298	3.35876	14.9161	5.66717	6.135		7.34438	5.81592		6.59339	6.23414	7.1514		7.99982	5.61929	5.40096	9.54415	6.32672	5.99783	6.67886	6.24016
Nd		17.894	32.1559	23.8468	22.1168	25.0441	29.4694	18.7872		26.1262	26.929	26.3345	23.4838	19.1426	18.138	21.8291	18.3181	20.556	23.4004	29.7908		25.6712		27.78	27.3363	14.0861	35.8651	21.1653	25.7822	14.7948	49.5802	22.7169	25.3431		24.6915	19.9726		25.5373	25.0132	28.8869		31.2547	21.8685	22.3614	41.4222	24.5197	25.2591	25.2156	23.4754
Sm		3.76998	8.31639	5.08474	4.78389	5.68312	5.23817	4.28442		5.5728	4.40347	5.17253	4.2506	3.53933	6.28509	3.88279	4.59194	4.6176	5.1502	5.48395		7.87526		5.38245	5.81883	3.64444	6.01751	5.01144	7.34358	3.4035	9.59714	4.81	5.61264		4.74074	4.13192		5.426	5.36782	5.74121		6.37905	4.31776	4.89925	9.07864	4.74541	5.35322	4.93144	5.57391
Eu		0.725334	1.00231	0.771853	0.701898	0.897389	0.713368	0.709523		0.708984	0.754073	0.799252	0.574329	0.481341	0.547263	0.640613	0.694617	0.731114	0.704715	0.906618		0.644045		0.804096	0.78132	0.696706	0.861959	1.11211	1.09174	1.06094	1.0771	1.23936	1.23903		0.355126	0.342003		1.20808	1.57568	1.53221		1.62894	1.15446	1.2391	1.45849	1.07954	1.20737	0.948181	0.412214
Gd		3.49173	8.6248	4.89228	4.5385	5.3023	4.52094	4.19196		5.03977	3.46398	4.15921	3.74034	3.02574	7.87409	2.99708	5.06963	4.768	5.2239	4.73098		8.65321		4.42776	5.48816	3.88802	4.83368	4.99606	8.06614	3.65137	8.94734	4.4534	5.51461		4.25498	3.73052		4.66155	4.84159	4.65096		5.45695	3.65659	4.39715	8.26925	4.15329	4.92784	4.36542	5.87976
Tb		0.613664	1.50849	0.825209	0.779571	0.95013	0.720056	0.729899		0.938046	0.552386	0.675369	0.593449	0.457524	1.42868	0.496261	0.936726	0.877808	0.939791	0.783525		1.57316		0.705527	0.932695	0.658694	0.785196	0.831439	1.33964	0.58451	1.40671	0.718103	0.835409		0.667401	0.615383		0.746386	0.770013	0.692357		0.822234	0.593482	0.725427	1.33464	0.663619	0.693041	0.641714	1.0309
Dy		3.9515	10.0182	5.35935	4.90639	5.67519	4.4545	4.58897		5.76855	3.18999	3.93854	3.68267	2.83135	10.1005	3.11464	6.4227	5.65329	6.03299	4.71324		10.3299		3.80272	5.77555	4.04586	4.66058	5.21382	8.18892	3.83104	8.63488	4.4817	5.63857		4.20962	3.97342		4.49936	4.43884	4.0964		4.73993	3.46772	4.26323	8.14681	3.87082	4.2715	3.99233	7.10007
Ho		0.800843	2.05677	1.07858	1.02784	1.21898	0.932667	0.988208		1.13189	0.658946	0.837614	0.768419	0.618131	2.37687	0.625519	1.37467	1.18187	1.27291	0.935237		2.11319		0.684466	1.1223	0.772174	0.903651	1.03181	1.64553	0.763694	1.70864	0.927672	1.11502		0.834534	0.802752		0.911917	0.896378	0.798272		0.951087	0.683202	0.809977	1.59639	0.745375	0.808148	0.782208	1.51153
Er		2.51377	6.96676	3.43473	3.14699	3.52915	2.81344	2.86132		3.49355	1.9592	2.42007	2.24652	1.79126	6.74285	1.98059	4.42699	3.87344	4.15806	2.85814		6.75156		1.83002	3.31372	2.32975	2.72495	3.19178	4.54815	2.32592	5.07301	2.73811	3.35164		2.47105	2.5394		2.84607	2.6733	2.37181		2.78666	2.11611	2.57146	5.14279	2.24744	2.52457	2.3304	4.56928
Tm		0.393829	1.15308	0.569419	0.456044	0.551313	0.407676	0.447218		0.535935	0.301845	0.389514	0.348594	0.282258	1.10989	0.299774	0.739447	0.625293	0.656627	0.440564		1.03051		0.236985	0.479762	0.359568	0.410281	0.468692	0.628909	0.341323	0.692793	0.422854	0.525755		0.379637	0.414395		0.414575	0.352679	0.31797		0.374179	0.278999	0.34701	0.755601	0.323452	0.351432	0.348362	0.694195
Yb		2.56708	7.76389	3.48934	3.2194	3.51079	2.97905	3.17526		3.52188	1.86097	2.36423	2.25393	1.93491	7.4769	2.00182	5.32334	4.59209	4.73757	2.77022		7.09818		1.49421	3.0642	2.46517	2.62206	3.01545	3.88761	2.08133	4.63701	2.73046	3.3725		2.96007	3.12687		2.61181	2.34813	2.0513		2.46708	1.97562	2.28482	5.02468	2.04273	2.28099	2.45214	4.87749
Lu		0.379671	1.14874	0.507881	0.469597	0.560947	0.428372	0.466296		0.544708	0.305596	0.396958	0.333588	0.306241	1.10703	0.303904	0.825758	0.688892	0.715345	0.416531		1.04863		0.233555	0.455885	0.384847	0.425089	0.446688	0.560836	0.316251	0.645098	0.401288	0.477399		0.390266	0.409942		0.39016	0.344516	0.304107		0.361249	0.28494	0.318509	0.759053	0.304475	0.326202	0.34128	0.649199
Hf		3.44136	3.80746	4.05989	3.73657	4.01691	4.13496	3.98846		4.25808	4.68111	4.54894	3.5	3.60535	5.17302	3.64804	3.10262	2.99066	3.17457	4.80132		4.03847		3.75728	3.87628	2.49599	4.75607	2.87701	3.36897	2.20196	7.37633	3.10336	4.04966		4.66027	3.54305		4.23387	3.94046	3.3153		4.10635	4.65914	5.0015	3.34712	4.29106	4.58298	4.85613	2.42475
Ta		0.634161	0.884642	0.822385	0.732292	0.79199	0.723246	0.776073		0.92652	0.655554	0.837984	0.73978	0.747224	2.80026	0.694154	1.02706	0.870102	0.861199	0.829706		1.97393		1.00002	1.07403	0.613042	1.09162	0.763736	1.01986	0.276371	1.36507	0.557618	0.656131		2.1601	2.29066		0.8456	0.88428	0.495112		0.529234	0.72601	0.721816	0.845801	0.775771	0.857399	1.00496	1.74858
Tl		0.73408	0.400206	0.805417	0.535103	0.600391	0.579964	0.551333		0.807308	0.70238	0.947194	0.928121	0.848778	1.47126	0.838163	1.10665	1.17957	1.22079	1.13713		1.40912		1.28422	1.0539	0.886515	0.856452	0.975189	0.763986	0.267567	0.983938	0.366901	0.355881		1.87558	1.46735		0.753647	0.523803	0.356735		0.333609	0.715441	0.614011	0.413709	0.744003	0.502668	0.574841	0.949545
Pb		19.7119	11.4825	17.3541	9.90839	14.6308	16.7085	14.5909		18.0368	13.1284	19.9209	19.3816	24.5246	16.3413	17.843	31.0434	25.3719	29.6004	18.9293		13.1051		27.3139	30.9678	16.4605	18.4944	14.1834	12.7486	5.51242	15.8946	9.89999	11.6821		23.3432	26.6625		14.6584	13.1443	7.1554		6.92309	17.2565	13.5397	12.432	13.1855	11.8411	15.2806	53.0064
Th		13.0572	5.13827	17.6134	13.7994	14.7263	23.6988	11.3167		16.3834	19.4719	20.0601	18.5033	20.525	19.5907	21.6141	10.9001	14.3175	15.9458	19.8723		15.1759		13.7307	21.1652	2.83015	26.5791	4.91218	5.4951	1.58784	27.2783	4.51068	7.83223		47.7383	34.9056		10.9748	8.86996	6.87531		7.62443	8.5247	5.56728	4.51026	11.0958	7.69818	20.3717	32.832
U		2.01395	2.01066	2.59885	2.06722	2.22506	2.73724	2.18147		2.93979	3.13541	3.72848	3.80933	3.33951	22.2364	3.91542	3.79355	2.8623	2.6324	2.88782		11.728		1.98422	4.76326	1.26474	4.10424	1.65177	1.34647	0.363701	4.09893	1.21248	2.53637		6.06	7.99001		2.07142	3.12739	1.37887		1.78459	1.66617	1.83023	2.70901	3.50444	3.0313	4.33561	9.36878
Sr/Y		6.07745	2.53185	4.43055	5.47468	4.90706	5.56991	5.21052		5.08747	9.37221	7.42464	5.62013	6.82983	2.14699	7.54959	4.28356	5.20625	4.67508	6.54679		2.04914		6.77629	3.71019	4.74779	5.2514	8.27551	4.60627	13.1525	3.51521	9.80662	8.1902		4.3818	4.35861		16.436	16.505	30.0445		25.4843	22.2067	19.038	7.93167	19.2857	18.2991	15.4875	1.43766
(La/Yb)N		5.81452	1.38979	5.98373	5.65919	5.49554	11.1666	4.47798		7.48951	15.8384	11.2019	11.3147	10.3059	0.965372	12.1467	2.65152	4.22785	4.79685	10.1439		1.56292		16.5206	7.25782	2.68471	14.5126	3.34113	2.61959	3.58395	9.56095	4.5244	4.17161		9.11935	6.90767		7.05338	6.61241	9.91319		8.64802	7.96067	5.60186	3.34392	9.12754	6.70517	8.83548	3.81529
Eu/Eu*		0.609393	0.360753	0.47173	0.459173	0.498316	0.446846	0.510342		0.407797	0.588542	0.525262	0.439065	0.448358	0.237131	0.572432	0.438842	0.474961	0.414146	0.542564		0.237818		0.502082	0.421451	0.564181	0.487178	0.677487	0.432394	0.917381	0.354312	0.816261	0.678874		0.241023	0.265533		0.732219	0.942157	0.903844		0.841591	0.885643	0.813777	0.513109	0.741233	0.716562	0.622932	0.219488
Note: (La/Yb)N in which N denotes normalized to chondritic values of McDonough and Sun (1995).
Eu* = ((Sm)N×(Gd)N)1/2

## Sheet: Table S4
TABLE S4. COMPILED WHOLE-ROCK MAJOR AND TRACE ELEMENT CONCENTRATIONS OF LATE TRIASSIC IGNEOUS ROCKS IN THE YIDUN TERRANE
References	Igneous bodies	Sample ID	Lithology	Longitude	Latitude	Age (Ma)	± 2σ	SiO2	TiO2	Al2O3	TFe2O3	MnO	MgO	CaO	Na2O	K2O	P2O5	LOI	Total	Li	Be	Sc	V	Cr	Co	Ni	Cu	Zn	Ga	Rb	Sr	Y	Zr	Nb	Cs	Ba	La	Ce	Pr	Nd	Sm	Eu	Gd	Tb	Dy	Ho	Er	Tm	Yb
Northern Yidun terrane
Wu, 2015	Sucuoma pluton	SCM-1h	Diorite	98.9358	31.5263			52.7	0.74	13.41	7.20803	0.14	11.33	7.1	2.76	1.27	0.17	n.g.	96.828	12.5	1.25	23.8	115	620	46.1	295	n.g.	n.g.	14.5	46	287	15.1	106	8.73	0.86	412	21.6	32.5	4.49	17	3.2	0.94	3.03	0.46	2.73	0.52	1.47	0.22	1.33
Wu, 2015	Sucuoma pluton	SCM-2h	Diorite	98.9358	31.5263			53.03	0.94	14.65	7.22024	0.18	7.88	8.11	3.01	1.34	0.18	n.g.	96.5402	18.1	1.52	25.5	175	414	28.6	49.1	n.g.	n.g.	16.1	48	442	20.9	125	12.2	1.41	422	22.2	44.1	5.02	19.7	3.92	1.18	3.92	0.6	3.85	0.72	1.94	0.28	1.84
Wu, 2015	Sucuoma pluton	SCM-3h	Diorite	98.9358	31.5263			51.24	0.89	16.83	7.6926	0.15	5.92	9.93	3.11	0.89	0.14	n.g.	96.7926	5.5	0.87	30.1	223	98.2	39.1	17.4	n.g.	n.g.	15.5	39	384	21.7	65.7	4.27	1.39	219	8.99	18.8	2.41	10.7	2.81	1.09	3.47	0.56	3.73	0.74	2.09	0.31	2.02
Wu, 2015	Sucuoma pluton	SCM-4h	Diorite	98.9358	31.5263			53.78	0.7	13.09	7.50805	0.14	9.44	7.39	2.73	1.32	0.2	n.g.	96.298	20.4	1.28	23.8	128	507	42.2	242	n.g.	n.g.	15.6	51	314	21.3	138	11.7	1.63	228	22	43.1	5.01	19.6	4.02	1.17	3.69	0.59	3.68	0.75	2.01	0.32	1.97
Wu, 2015	Sucuoma pluton	SCM-12h	Diorite	98.9358	31.5263			52.4	1.43	14.74	10.367	0.19	6.05	9.37	3.04	0.7	0.13	n.g.	98.417	5.43	0.81	32.1	2.8	90	58.8	30.9	n.g.	n.g.	17.4	9	318	27.5	89.7	10.1	0.51	374	25.1	56.9	6.95	27.6	5.35	1.4	5	0.76	4.66	0.89	2.69	0.42	2.61
Wu, 2015	Sucuoma pluton	SCM-14h	Diorite	98.9358	31.5263			57.91	0.96	15.84	5.83675	0.11	5.33	6.27	3.18	2.61	0.25	n.g.	98.2967	21.7	2.04	16.6	130	175	39.9	93.9	n.g.	n.g.	19.9	97	539	22.7	210	20.1	2.69	753	33.8	66.3	7.61	28.8	5.41	1.36	4.66	0.7	4.07	0.77	2.09	0.32	1.88
Wu, 2015	Sucuoma pluton	SCM-22h	Diorite	98.9358	31.5263			59.28	0.63	16.86	6.1482	0.13	2.94	6.25	2.92	2.85	0.2	n.g.	98.2082	11	1.58	17.1	155	13.1	41	9.03	n.g.	n.g.	17.6	107	475	20.7	93	7.52	2.35	856	28.4	52.8	5.85	22.8	4.68	1.2	3.97	0.58	3.34	0.73	2	0.31	2.11
Wu, 2015	Sucuoma pluton	SCM-25h	Diorite	98.9358	31.5263			54.13	1.21	13.34	7.63354	0.14	9.12	7.19	2.51	1.44	0.2	n.g.	96.9135	15.1	1.7	27.5	198	523	40.2	156	n.g.	n.g.	16.7	52	307	22.3	139	17.2	1.13	396	25.8	51	5.68	22.9	4.69	1.32	4.39	0.68	4.07	0.79	2.22	0.32	1.94
Wu et al., 2017	Sucuoma pluton	SCM-6h	Granite	98.9358	31.5263			73.58	0.22	13.79	1.64464	0.03	0.49	1.31	2.8	5.14	0.1	0.75	99.8546	78.6972	6.97905	3.7485	12.2863	5.80842	33.0991	1.73216	n.g.	n.g.	19.9775	311.344	111.46	21.3009	140.676	19.8069	17.6146	443.19	44.3797	83.9667	8.92929	31.3337	6.21216	0.683646	4.90477	0.742865	3.92019	0.677472	1.85283	0.262038	1.75106
Wu et al., 2017	Sucuoma pluton	SCM-7h	Granite	98.9358	31.5263			74.45	0.19	12.94	1.79135	0.04	0.32	1.18	3.27	4.94	0.05	0.7	99.8714	138.07	7.54069	4.35091	9.82655	3.69379	28.4689	1.62531	n.g.	n.g.	20.8803	528.569	65.9149	51.6845	172.633	21.3687	25.434	244.606	57.4893	113.573	12.2398	41.999	9.05166	0.441185	8.01108	1.40285	8.43066	1.65631	4.71254	0.728502	4.76766
Wu et al., 2017	Sucuoma pluton	SCM-8h	Granite	98.9358	31.5263			73.36	0.22	13.818	1.91142	0.03	0.34	1.27	3.23	5.2	0.04	0.43	99.8494	88.5572	6.94473	4.3666	10.4913	4.35908	30.4504	2.54927	n.g.	n.g.	20.7789	388.058	77.8705	37.6859	183.051	18.7641	19.0171	202.492	66.6607	133.158	14.3641	48.3297	9.08125	0.481948	7.32378	1.17413	6.87252	1.27965	3.42779	0.507831	3.23328
Wu et al., 2017	Sucuoma pluton	SCM-9h	Granite	98.9358	31.5263			64.07	0.35	18.79	3.5182	0.06	0.79	6.91	3.32	0.99	0.07	0.96	99.8282	19.4412	1.53677	12.7382	45.1626	5.71902	42.9964	2.55465	n.g.	n.g.	19.3336	34.6528	399.369	27.3847	211.15	5.94309	2.58631	381.564	12.8158	28.2017	3.73284	16.2784	4.34067	1.33154	4.61776	0.742783	4.73934	0.983471	2.75028	0.41015	2.4031
Wu et al., 2017	Sucuoma pluton	SCM-10h	Granite	98.9358	31.5263	235	2	72.06	0.37	14.14	2.22255	0.06	1.15	2.19	2.98	3.77	0.12	0.51	99.5725	14.4	n.g.	4.335	25.9825	21.6764	4.617	12.83	n.g.	n.g.	n.g.	157.237	128.9	15.74	128.9	16.4	4.335	762.93	34.18	56.23	6.122	20.89	3.849	0.872	3.306	0.516	2.872	0.515	1.479	0.221	1.434
Wu et al., 2017	Sucuoma pluton	SCM-11h	Granite	98.9358	31.5263			61.39	0.61	16.37	5.78741	0.11	2.9	5.42	2.76	2.55	0.18	1.61	99.6874	22.7126	1.32522	16.19	146.545	14.2428	20.925	8.25209	n.g.	n.g.	15.8434	73.8587	512.437	18.2418	95.5175	7.11177	6.92609	1385.98	26.9787	48.4007	5.26355	19.7471	3.7977	1.09655	3.28976	0.516351	2.93835	0.629847	1.79041	0.274205	1.83883
Wu et al., 2017	Sucuoma pluton	SCM-13h	Granite	98.9358	31.5263			63.56	0.48	15.96	4.67263	0.11	2.18	5.13	2.78	3.38	0.17	1.29	99.7126	10.7143	1.70727	10.6473	99.5921	12.077	26.7635	7.0721	n.g.	n.g.	14.9442	105.283	531.527	14.9211	102.758	7.36722	2.12028	1272.8	33.2698	54.0613	5.20001	18.3555	3.28455	0.944426	2.84103	0.388715	2.49874	0.494584	1.51943	0.233444	1.69094
Wu et al., 2017	Sucuoma pluton	SCM-16h	Granite	98.9358	31.5263			66.95	0.58	14.92	3.86607	0.07	2.14	4.13	3.19	3.12	0.16	0.67	99.7961	32.7803	2.09617	9.26618	63.9907	35.9755	25.5737	18.0447	n.g.	n.g.	17.2078	123.589	469.595	17.0259	165.03	14.6229	8.64204	656.501	39.5948	67.9605	6.81023	23.1206	4.17988	1.07605	3.41839	0.508826	2.80313	0.571668	1.5804	0.226864	1.53231
Wu et al., 2017	Sucuoma pluton	SCM-17h	Granite	98.9358	31.5263			67.88	0.52	14.89	3.55825	0.07	1.87	3.93	3.27	3.12	0.14	0.57	99.8182	26.4926	2.4882	7.99998	54.0848	30.8253	27.9585	16.4456	n.g.	n.g.	17.1513	118.383	441.343	15.3717	142.517	14.2033	4.53226	545.074	31.2406	58.1126	5.62146	19.7084	3.23713	0.953312	3.07185	0.443286	2.66164	0.492158	1.5275	0.206599	1.40174
Wu et al., 2017	Sucuoma pluton	SCM-21h	Granite	98.9358	31.5263			60.56	0.93	16.03	5.92746	0.13	3.52	5.78	3.31	2.16	0.2	1.24	99.7875	31.7467	1.9299	16.0943	91.2722	71.7194	24.56	9.4372	n.g.	n.g.	17.73	94.8456	448.835	22.3331	160.687	15.3268	4.74363	554.502	31.3524	54.5666	5.98199	22.0646	4.2537	1.25969	3.98263	0.618215	3.63417	0.735864	2.10382	0.313902	2.0422
Wu et al., 2016	Ganluogou pluton	GL-3h	Ferrodiorite	99.3374	31.5513			41.12	1.45	19.94	14.7127	0.28	6.02	11.45	1.37	1.72	0.66	n.g.	98.7227	5.62304	0.941328	33.6349	281.913	2.64161	44.2212	3.96263	n.g.	n.g.	23.4886	53.0521	717.322	37.1438	29.2643	7.2674	0.682872	856.812	22.4974	54.7789	7.72369	36.2748	8.49873	2.39102	7.7836	1.13994	6.67388	1.36148	3.77692	0.544015	3.50631
Wu et al., 2016	Ganluogou pluton	GL-4h	Ferrodiorite	99.3374	31.5513			41.44	1.88	20.7	13.8026	0.18	5.56	10.66	2.01	1.79	0.69	n.g.	98.7126	13.7821	1.04932	39.9465	367.763	2.12243	42.179	4.434	n.g.	n.g.	23.3817	69.841	724.099	44.4289	40.4434	12.2241	1.37763	884.499	30.8918	76.1346	10.6079	47.2176	11.1766	2.68272	9.79621	1.40287	8.04359	1.6021	4.27072	0.584622	3.52308
Wu et al., 2016	Ganluogou pluton	GL-19h	Ferrodiorite	99.3374	31.5513			42.71	1.38	19.62	12.8802	0.18	5.81	11.69	1.97	1.43	0.51	n.g.	98.1802	6.16114	1.42929	42.5192	459.539	9.34117	41.4993	9.50993	n.g.	n.g.	21.0427	45.8965	726.809	36.673	54.6202	9.69455	1.23387	484.92	28.3515	67.4841	9.21373	40.1758	9.33538	2.16221	8.17754	1.13423	6.82449	1.32082	3.61291	0.538934	2.9896
Wu et al., 2016	Ganluogou pluton	GL-6h	Ferrodiorite	99.3374	31.5513			43.02	1.29	20.01	11.7635	0.16	6.14	12.15	1.24	2.58	0.52	n.g.	98.8735	7.62664	1.58568	33.3045	364.608	14.1572	43.5866	14.323	n.g.	n.g.	19.9372	130.348	721.752	14.234	14.5525	4.72813	2.09291	877.139	21.4301	45.3376	5.63483	23.767	4.92119	1.58271	4.05011	0.523271	2.82693	0.516699	1.35261	0.18777	1.15265
Wu et al., 2016	Ganluogou pluton	ZK-11H	Ferrodiorite	99.3374	31.5513	213	2	43.1498	1.544	20.1441	13.4241	0.247041	6.76274	12.0947	2.12043	0.926402	0.514668	n.g.	100.928	3.865	n.g.	44.6782	422.2	26.34	33.61	8.63352	n.g.	n.g.	n.g.	26.2773	583.49	30.97	38.3	5.563	1.152	444.626	21.01	49.78	7.439	34.32	7.431	2.012	6.62245	1.047	5.824	1.168	3.447	0.495	3.182
Wu et al., 2016	Ganluogou pluton	GL-24h	Ferrodiorite	99.3374	31.5513			43.37	1.12	18.57	11.1702	0.2	7.31	12.28	1.51	1.64	0.35	n.g.	97.5202	8.21252	1.37007	47.1911	358.724	47.067	45.9863	21.8791	n.g.	n.g.	17.8787	56.094	639.006	33.7832	57.0179	8.67101	2.25972	537.833	22.4453	57.178	7.98248	35.2277	8.26922	2.11131	6.85064	1.02174	6.1176	1.18727	3.22913	0.48198	3.13635
Wu et al., 2016	Ganluogou pluton	ZK-16H	Ferrodiorite	99.3374	31.5513			43.145	1.79135	20.743	13.9851	0.193384	5.6285	11.084	1.65903	2.0458	0.631043	n.g.	100.906	9.77	n.g.	33.4572	456.19	22.81	38.11	5.98644	n.g.	n.g.	n.g.	73.0604	634.22	28.38	34.7	8.516	1.515	783.902	23.11	55.25	8.24	37.75	8.203	2.093	7.1516	1.042	5.69	1.101	3.234	0.424	2.803
Wu et al., 2016	Ganluogou pluton	GL-20h	Ferrodiorite	99.3374	31.5513			43.85	1.15	19.18	11.278	0.19	6.92	13.07	1.66	1.25	0.38	n.g.	98.928	3.00658	1.40376	44.023	372.452	26.56	49.5433	19.8	n.g.	n.g.	18.481	30.8384	648.525	27.1494	53.9687	7.5944	0.382649	373.234	22.8063	54.0249	6.99022	29.7626	6.6719	2.06378	5.63039	0.792818	4.88491	0.95725	2.56544	0.375479	2.66364
Wu et al., 2016	Ganluogou pluton	GL-33h	Ferrodiorite	99.3374	31.5513			43.96	1.13	18.69	10.9868	0.18	7.2	13.15	1.62	1.01	0.34	n.g.	98.2668	4.98389	1.52619	47.7295	356.77	55.6829	46.7352	23.0712	n.g.	n.g.	17.9786	17.9224	621.033	28.3108	54.8213	7.44317	0.438916	207.554	21.0843	51.038	6.71548	28.3123	6.30505	1.77464	5.58645	0.808455	5.03514	0.943475	2.66132	0.422691	2.63171
Wu et al., 2016	Ganluogou pluton	GL-16h	Ferrodiorite	99.3374	31.5513			44.05	1.01	18.21	9.47667	0.17	7.77	12.99	1.26	2.05	0.27	n.g.	97.2567	11.3903	0.999388	49.5018	311.487	102.247	44.9756	31.9678	n.g.	n.g.	16.0583	94.9551	587.762	15.8741	34.4956	5.51638	1.62947	756.359	13.6182	30.3907	3.95876	16.9096	3.80343	1.02431	3.48669	0.474125	2.93307	0.579905	1.58894	0.243342	1.52191
Wu et al., 2016	Ganluogou pluton	GL-8h	Ferrodiorite	99.3374	31.5513			44.25	1.26	19.39	11.1635	0.19	6.89	11.62	1.6	1.96	0.36	n.g.	98.6835	6.32623	1.50638	38.7052	348.742	12.0794	47.2475	28.4484	n.g.	n.g.	19.8342	71.7045	654.717	30.6399	45.2335	8.67701	1.23175	686.822	25.3944	59.4696	7.74369	32.664	7.10358	2.01524	6.20094	0.882246	5.38831	1.0877	3.01326	0.447752	2.79388
Wu et al., 2016	Ganluogou pluton	GL-17h	Ferrodiorite	99.3374	31.5513			45.33	1.14	19	10.6879	0.18	6.1	12.32	1.83	1.21	0.36	n.g.	98.1579	5.25774	1.54639	48.6875	380.818	64.9744	38.4045	14.7734	n.g.	n.g.	19.1246	29.7523	693.017	27.6152	62.7789	7.55859	0.862577	293.211	27.1151	61.7846	7.71389	32.0337	6.90301	1.88359	6.02227	0.827389	4.83177	0.927994	2.68715	0.426846	2.71062
Wu et al., 2016	Ganluogou pluton	ZK-13H	Ferrodiorite	99.3374	31.5513			45.5699	1.07428	21.6288	10.145	0.184162	6.02619	13.2801	1.49376	1.03335	0.327399	n.g.	100.763	2.795	n.g.	55.9482	300.96	56.2084	31.91	13.5756	n.g.	n.g.	n.g.	25.4528	574.655	42.6	66.6	9.8521	0.909	295.666	27.85	69.28	10.84	49.03	11.67	2.339	9.8135	1.479	8.249	1.659	4.837	0.7	4.584
Wu et al., 2016	Ganluogou pluton	GL-30h	Ferrodiorite	99.3374	31.5513			49.01	0.64	18.24	6.79308	0.12	7.94	12.69	1.71	1.21	0.16	n.g.	98.5131	9.19937	0.768845	39.0866	186.675	138.895	37.7386	74.0546	n.g.	n.g.	14.2681	36.9032	498.376	15.1775	40.0007	5.04108	1.52634	273.996	12.7484	27.531	3.3944	13.3013	3.05123	0.940494	2.96393	0.452547	2.75685	0.516327	1.44287	0.211608	1.3199
Wu et al., 2016	Ganluogou pluton	GL-14h	Ferrodiorite to diorite	99.3374	31.5513			43.21	1.1	18.57	10.7434	0.18	7.16	13.03	0.97	1.9	0.35	n.g.	97.2134	7.93657	1.151	50.0879	363.896	49.468	55.02	23.0493	n.g.	n.g.	17.3761	82.1463	639.225	22.755	43.7929	6.28123	0.490371	633.72	19.4683	43.9812	5.75747	24.9099	5.79086	1.61632	4.85223	0.678491	4.16652	0.83843	2.20369	0.316229	1.99419
Wu et al., 2016	Ganluogou pluton	GL-9h	Ferrodiorite to diorite	99.3374	31.5513			45.18	1.38	20.05	11.679	0.17	4.64	10.45	2.33	2.4	0.78	n.g.	99.059	9.78871	1.53877	19.4659	296.161	1.39658	38.8055	4.52467	n.g.	n.g.	22.2957	102.38	922.619	21.9329	57.3385	7.1958	1.90363	1075.06	43.2413	92.717	10.7522	41.4282	7.56754	1.85223	6.01887	0.733563	3.89781	0.759982	2.04242	0.285339	1.70821
Wu et al., 2016	Ganluogou pluton	ZK-20H	Ferrodiorite to diorite	99.3374	31.5513			45.8603	1.07725	19.8625	10.7465	0.194932	6.92521	12.4449	1.43634	1.77491	0.430902	n.g.	100.754	7.039	n.g.	60.858	315.02	63.24	37.63	23.12	n.g.	n.g.	n.g.	69.8982	516.515	39.57	58.7	10.93	1.319	433.748	29.05	74.7	11.75	53.1	12.02	2.612	9.7185	1.474	8.054	1.55	4.394	0.64	4.043
Wu et al., 2016	Ganluogou pluton	GL-18h	Ferrodiorite to diorite	99.3374	31.5513			45.88	1.27	20.1	11.2046	0.17	4.62	9.02	2.67	1.96	0.61	n.g.	97.5046	13.5446	1.87782	25.6678	293.783	8.44059	33.4403	7.76738	n.g.	n.g.	22.3802	90.6058	759.397	24.8541	109.872	9.67205	2.40222	776.841	31.666	67.6444	8.43805	35.6723	7.4867	1.98804	6.28348	0.81214	4.53316	0.910747	2.27948	0.321377	1.94429
Wu et al., 2016	Ganluogou pluton	GL-28h	Ferrodiorite to diorite	99.3374	31.5513			46.28	0.89	17.96	9.28667	0.18	7.12	12.67	1.72	1.87	0.41	n.g.	98.3867	11.7179	1.83918	50.4825	314.535	70.114	39.4837	31.644	n.g.	n.g.	16.8395	80.2463	645.101	25.5748	63.3487	6.20956	1.4522	445.457	22.4939	53.9838	7.28091	31.9076	7.4114	1.99133	5.86121	0.806231	4.64612	0.880308	2.38199	0.366501	2.35289
Wu et al., 2016	Ganluogou pluton	ZK-9H	Ferrodiorite to diorite	99.3374	31.5513			46.8983	1.12417	19.1415	10.2551	0.194175	6.55084	13.7864	1.52274	0.981094	0.296372	n.g.	100.751	4.662	n.g.	64.8858	357.865	43.21	36.8	9.56124	n.g.	n.g.	n.g.	23.6971	476.045	25.37	49.7	6.165	0.855	212.954	20.1	43.47	6.346	27.25	6.058	1.607	5.46725	0.814	4.879	0.938	2.652	0.38	2.54
Wu et al., 2016	Ganluogou pluton	GL-2h	Ferrodiorite to diorite	99.3374	31.5513			47.79	0.72	17.49	7.89206	0.15	7.87	12.48	1.72	1.31	0.17	n.g.	97.5921	10.216	1.04455	55.1433	258.76	176.53	45.9869	41.0714	n.g.	n.g.	14.983	53.3749	472.578	15.6784	48.2122	3.86577	1.73798	255.846	11.4168	24.4477	3.14921	13.7928	3.40495	1.06906	3.33943	0.477307	2.73643	0.547706	1.53273	0.219433	1.42379
Wu et al., 2016	Ganluogou pluton	ZK-17H	Ferrodiorite to diorite	99.3374	31.5513			49.1037	1.19169	19.6781	10.8774	0.162966	4.55286	9.02424	2.77042	3.12691	0.509269	n.g.	100.998	29.5	n.g.	26.313	279.87	17.36	27.24	2.92788	n.g.	n.g.	n.g.	149.768	529.625	22.04	62.9	9.296	3.783	1071.14	26.62	59.69	8.191	34.52	6.751	1.821	5.29815	0.822	4.226	0.802	2.289	0.307	2.046
Wu et al., 2016	Ganluogou pluton	GL-26h	Ferrodiorite to diorite	99.3374	31.5513			49.31	0.85	18.5	8.88107	0.17	6.14	10.58	2.32	1.73	0.15	n.g.	98.6311	9.56683	1.86015	38.2477	286.747	74.6181	40.255	33.801	n.g.	n.g.	17.8541	76.7596	493.791	37.7892	27.9286	9.00368	2.10789	317.949	21.8156	56.4171	7.8201	34.1331	7.84898	1.81997	6.86509	1.02768	6.38832	1.24306	3.62052	0.582549	3.7782
Wu et al., 2016	Ganluogou pluton	ZK-14H	Ferrodiorite to diorite	99.3374	31.5513			49.407	0.869121	19.8875	8.46846	0.153374	6.07362	12.0757	1.59509	1.75	0.347648	n.g.	100.627	7.282	n.g.	51.2616	290.985	48.1107	31.47	21.45	n.g.	n.g.	n.g.	56.3958	491.34	30.89	37.7	8.291	1.532	390.53	27.54	61.96	8.855	37.95	8.249	1.785	6.8419	1.006	5.65	1.076	3.178	0.479	3.062
Wu et al., 2016	Ganluogou pluton	GL-23h	Ferrodiorite to diorite	99.3374	31.5513			51.46	0.66	17.05	8.70549	0.17	5.92	10.11	2.04	2.03	0.23	n.g.	98.3755	8.11313	2.22309	49.4789	242.104	76.2698	37.3071	27.4071	n.g.	n.g.	17.1634	61.8747	507.859	51.7043	88.0676	9.20557	2.40947	262.888	32.2855	82.0943	11.4623	51.4805	12.5509	2.37163	10.6628	1.53115	9.23704	1.80066	5.10986	0.758959	4.75081
Wu et al., 2016	Ganluogou pluton	GL-7h	Diorite	99.3413	31.5711			55.7	0.73	18.52	6.7408	0.12	3.3	7.29	2.97	3.14	0.27	n.g.	98.7808	17.3156	2.1244	19.2744	166.896	19.5897	31.6118	12.9612	n.g.	n.g.	19.0076	119.591	543.673	21.9363	197.819	9.98032	3.347	879.085	32.0782	64.4869	7.61621	28.657	5.67544	1.5332	4.58532	0.657016	3.77007	0.786016	2.13061	0.312402	1.98851
Wu et al., 2016	Ganluogou pluton	GL-10h	Diorite	99.3413	31.5711			48.1	1.52	15.77	11.7358	0.19	6.44	8.87	2.11	3.23	0.47	n.g.	98.4358	11.8088	1.70787	33.3391	309.688	35.8101	43.2631	22.9544	n.g.	n.g.	18.4853	132.21	482.229	31.1495	194.798	11.7927	3.0606	1040.67	32.5851	72.6118	9.18778	37.5352	8.03788	1.63545	6.6665	0.933418	5.47422	1.07553	2.93405	0.448465	2.85088
Wu et al., 2016	Ganluogou pluton	GL-11h	Diorite	99.3413	31.5711			53.77	0.8	18.02	7.73424	0.13	4.19	8.23	2.56	3.02	0.3	n.g.	98.7542	9.74115	1.8086	24.7653	221.714	28.6176	34.2018	18.1812	n.g.	n.g.	18.8562	107.048	548.638	30.5405	106.825	8.35818	3.86553	874.858	34.2861	72.1982	8.68922	35.4037	7.47087	1.66716	6.25302	0.878527	5.17084	1.05509	2.98591	0.411461	2.77686
Wu et al., 2016	Ganluogou pluton	GL-15h	Diorite	99.3413	31.5711			55.34	0.78	17.98	7.13641	0.13	3.67	7.25	2.75	3.49	0.29	n.g.	98.8164	16.8265	1.96584	21.4484	180.117	20.9272	31.1709	14.4323	n.g.	n.g.	18.4151	128.302	528.6	21.8041	172.41	10.3383	4.42527	883.797	33.2516	65.4079	7.31969	29.0586	5.75515	1.56899	4.51791	0.653047	3.76042	0.757234	2.0595	0.314934	2.15357
Wu et al., 2016	Ganluogou pluton	GL-32h	Diorite	99.3413	31.5711			54.97	0.84	17.34	7.53645	0.13	4.12	7.4	2.55	3.48	0.28	n.g.	98.6464	14.7809	1.85815	23.995	204.284	32.1767	39.462	18.4327	n.g.	n.g.	17.2091	133.097	521.872	21.6468	162.852	8.84626	3.57617	981.869	32.6574	63.3677	7.17055	27.7523	5.52904	1.43582	4.43528	0.66304	3.79226	0.766771	2.10356	0.333839	2.20671
Wu et al., 2016	Ganluogou pluton	ZK-8H	Diorite	99.3413	31.5711	209	2	54.2151	1.0002	18.5956	8.74444	0.153092	4.4703	8.23637	2.55154	2.42907	0.285773	n.g.	100.682	17.57	n.g.	30.1912	236.645	43.1697	24.94	16.98	n.g.	n.g.	n.g.	80.9562	452.77	21.2	121.5	8.723	2.837	1118.18	26.71	53.53	6.818	27.72	5.477	1.438	4.79655	0.722	4.005	0.75	2.206	0.325	2.128
Wu et al., 2016	Ganluogou pluton	ZK-10H	Diorite	99.3413	31.5711			52.3756	1.19292	17.7088	10.4543	0.174825	5.61497	8.89552	2.14932	1.87166	0.380502	n.g.	100.818	12.19	n.g.	36.9166	326.23	43.26	31.45	18.93	n.g.	n.g.	n.g.	54.8729	501.03	25.38	81	9.9102	1.421	1000.58	28.43	60.19	7.935	33.01	7.079	1.499	5.75795	0.869	4.745	0.924	2.641	0.383	2.535
Wu et al., 2016	Ganluogou pluton	ZK-12H	Diorite	99.3413	31.5711			46.5316	1.64723	15.5515	14.3311	0.255781	7.49949	9.47411	1.67792	3.43769	0.624105	n.g.	101.031	6.504	n.g.	53.1258	404.9	52.89	41.73	24.2136	n.g.	n.g.	n.g.	138.322	342.285	33.59	232.4	14.71	2.492	1247.54	27.64	68.85	10.55	47.49	10.38	1.942	8.4797	1.253	6.68	1.252	3.556	0.508	3.211
Wu et al., 2016	Ganluogou pluton	ZK-18H	Diorite	99.3413	31.5711			54.3396	1.23406	16.2672	10.1902	0.152983	4.93626	7.59816	2.12137	3.6512	0.428353	n.g.	100.919	29.49	n.g.	33.3424	266.475	39.8666	28.3	14.37	n.g.	n.g.	n.g.	160.244	377.34	19.92	206.1	16.73	5.87	1218.14	18.16	40.41	6.084	27.08	6.073	1.259	5.11195	0.765	4.123	0.749	2.068	0.286	1.827
Wu et al., 2016	Ganluogou pluton	ZK-19H	Diorite	99.3413	31.5711			45.0782	1.76837	14.4128	16.2093	0.275989	8.52499	9.20985	1.54349	3.52653	0.633752	n.g.	101.183	8.015	n.g.	51.948	431.49	66.6212	44.44	27.0108	n.g.	n.g.	n.g.	145.597	284.05	29.67	248.7	14.88	2.56	1288	27.03	66.23	9.98	44.16	9.27	1.407	7.6969	1.155	6.196	1.17	3.384	0.464	3.003
Wu et al., 2016	Ganluogou pluton	GL-31h	Diorite	99.3413	31.5711			44.48	1.75	12.85	16.3742	0.3	8.43	8.53	1.43	3.92	0.59	n.g.	98.6542	14.873	1.03561	51.1124	423.332	47.9249	51.1693	29.9336	n.g.	n.g.	18.8677	176.984	257.57	38.0243	249.443	17.9272	3.0271	1484.87	37.168	81.7637	10.5324	45.4438	10.1889	1.48075	8.65648	1.21402	7.09402	1.36093	3.5602	0.552708	3.36627
Wu et al., 2017	Ajiseduo pluton	AJSD-1H	Granite	99.319	31.631	224	2	74.78	0.2	13.15	1.87026	0.04	0.68	1.68	2.83	3.94	0.08	0.66	99.9103	4.748	n.g.	4.80584	24.149	14.29	3.216	11.43	n.g.	n.g.	n.g.	134.151	165.3	16.23	90.3	7.884	3.943	710.304	21.59	41.06	4.704	16.64	3.16	0.761	2.66855	0.448	2.579	0.53	1.687	0.264	1.869
Wu et al., 2017	Ajiseduo pluton	AJSD-2H	Granite	99.319	31.631			71.51	0.3	14.96	2.20031	0.04	0.96	2.1	2.87	3.99	0.13	0.92	99.9803	14.68	n.g.	5.37056	31.5495	19.3248	4.369	12.77	n.g.	n.g.	n.g.	196.231	202.35	13.23	126	8.401	4.231	638.47	34.14	62.48	7.193	24.68	4.534	0.934	3.28415	0.485	2.392	0.418	1.148	0.179	1.163
Wu et al., 2017	Ajiseduo pluton	AJSD-3H	Granite	99.319	31.631			71.47	0.33	14.54	2.56594	0.05	1.13	2.13	2.86	4.15	0.11	0.69	100.026	7.575	n.g.	7.1396	38.323	26.39	5.345	14.64	n.g.	n.g.	n.g.	167.422	191.805	19.5	139.6	9.786	3.443	748.818	45.17	83.31	9.803	34.38	6.266	0.94	4.7139	0.692	3.548	0.656	1.873	0.272	1.862
Wu et al., 2017	Ajiseduo pluton	AJSD-4H	Granite	99.319	31.631			70.73	0.39	14.33	3.08263	0.06	1.22	2.14	2.45	4.41	0.13	1.09	100.033	12.12	n.g.	9.27056	51.2905	25.0801	6.342	11.67	n.g.	n.g.	n.g.	157.722	224.96	18.19	152.3	9.323	3.102	1095.64	37.32	76.91	8.679	30.84	5.092	1.054	4.11255	0.622	3.243	0.616	1.752	0.259	1.741
Wu et al., 2017	Jiaduocuo pluton	JDC-1H	Granite	99.375	31.755	218	1	67.47	0.51	14.79	5.14	0.08	1.62	3.75	2.75	2.83	0.12	0.72	99.78	41.45	n.g.	19.09	69.74	24.4212	10.87	7.593	n.g.	n.g.	n.g.	115.8	189.441	34.22	135.2	8.572	4.933	933.3	34.03	63.49	7.403	25.85	5.7209	1.05355	5.707	0.96621	5.891	1.212	3.658	0.557	3.465
Wu et al., 2017	Jiaduocuo pluton	JDC-2H	Granite	99.375	31.755			72.26	0.36	13.35	3.59	0.07	0.95	2.19	2.88	3.15	0.1	0.88	99.78	38.51	n.g.	12.25	43.04	16.4312	5.701	5.048	n.g.	n.g.	n.g.	116.2	192.933	30.01	126.6	6.967	4.668	946.4	20.2	46.03	4.823	17.44	4.14865	0.8968	4.435	0.79394	4.992	1.064	3.191	0.516	3.364
Wu et al., 2017	Jiaduocuo pluton	JDC-3H	Granite	99.375	31.755			70.58	0.4	14.11	4.02	0.07	1.27	2.93	2.66	2.95	0.1	0.7	99.79	45.86	n.g.	13.17	53.1	16.7038	7.992	5.207	n.g.	n.g.	n.g.	124.2	176.54	27.11	118.1	7.202	8.212	755.4	31.14	57.43	6.637	22.26	4.46215	0.9139	4.605	0.77361	4.679	0.948	2.834	0.465	3.013
Wu et al., 2017	Jiaduocuo pluton	JDC-4H	Granite	99.375	31.755			66.73	0.53	14.92	5.33746	0.09	1.85	4.3	2.61	2.58	0.12	1.21	100.277	32.04	n.g.	18.1168	82.4315	21.475	11.94	6.699	n.g.	n.g.	n.g.	105.827	162.83	27.1617	123.2	7.475	6.447	651.504	22.8549	43.5786	5.59329	21.5451	4.45443	0.93462	4.44155	0.75258	4.60539	0.96903	2.93706	0.44733	3.03585
Wu et al., 2017	Shaluli batholith	CJM-2H	Granite	99.8032	31.1943			72.46	0.27	14.2	2.55	0.04	0.59	2.5	3	3.63	0.09	0.43	99.76	26.94	n.g.	5.286	25.01	10.6878	3.144	2.61	n.g.	n.g.	n.g.	118.6	199.82	24.17	153.5	7.18	2.881	1288	41.11	72.54	7.666	24.21	4.59515	0.9614	4.311	0.66019	3.82	0.8	2.402	0.406	2.407
Wu et al., 2017	Shaluli batholith	CJM-4H	Granite	99.7831	31.1733			72.62	0.33	13.78	3	0.05	0.79	2.4	2.96	3.21	0.1	0.53	99.77	30.19	n.g.	7.176	34.13	15.5382	4.318	5.926	n.g.	n.g.	n.g.	122.6	195.649	23.76	160.8	8.735	4.517	1103	45.24	74.83	8.666	28.05	5.0844	0.9785	4.771	0.74044	4.099	0.802	2.321	0.365	2.255
Wu et al., 2017	Shaluli batholith	CJM-5H	Granite	99.8213	31.2056			73.28	0.27	13.52	2.7	0.06	0.67	2.23	2.79	3.71	0.08	0.48	99.79	30.02	n.g.	5.002	28.56	9.7196	3.641	2.74	n.g.	n.g.	n.g.	159.3	153.066	20.99	119.6	7.77461	8.087	922	35.14	61.43	6.604	20.93	3.8209	0.81795	3.624	0.57994	3.325	0.681	2.14	0.345	2.451
Wu et al., 2017	Shaluli batholith	CJM-6H	Granite	99.8508	31.2278	219	1	73.44	0.25	13.77	2.47	0.05	0.57	2.33	3.09	3.39	0.09	0.36	99.81	40.82	n.g.	6.1005	26.04	11.1766	3.274	2.19	n.g.	n.g.	n.g.	134.3	166.355	23.43	122.8	7.305	4.846	643.2	41.7	68.03	7.988	25.59	4.50965	0.88065	4.27	0.68908	3.886	0.796	2.477	0.401	2.698
Wu et al., 2017	Shaluli batholith	CJM-7H	Granite	99.8766	31.2717			72.85	0.29	13.44	2.79	0.06	0.83	2.39	2.63	3.82	0.09	0.59	99.78	21.84	n.g.	6.959	37.08	15.2374	4.657	4.14	n.g.	n.g.	n.g.	149.4	157.3	21.28	115.5	7.66	3.981	966.6	48.98	85.76	9.004	28.5	5.06825	0.8873	4.372	0.64093	3.634	0.746	2.201	0.365	2.426
Wu et al., 2017	Shaluli batholith	CJM-9H	Granite	99.9126	31.3414			71.24	0.41	13.79	3.73	0.07	1.14	2.99	2.55	3.32	0.11	0.44	99.79	37.53	n.g.	10.22	51.45	18.33	6.235	5.731	n.g.	n.g.	n.g.	144.3	182.4	25.52	150.4	10.77	6.598	915.8	47.35	85.25	9.267	30.25	5.54515	1.0545	5.188	0.76612	4.354	0.863	2.61	0.41	2.588
Wang et al., 2017	Shaluli batholith	CJM04	Dioritic enclave	99.8549	31.231			53.56	1.02	17.38	10.85	0.23	2.9	4.94	3.93	2.93	0.26	1.3	99.3	n.g.	n.g.	29.62	186.6	8.99	16.71	4.88	8.22	128	25.39	213	211	80.08	138	23.34	6.49	670	25.77	64.91	9.17	42.07	11.81	1.01	11.99	2.23	13.9	2.97	8.33	1.21	7.51
Wang et al., 2017	Shaluli batholith	CJM08	Dioritic enclave	99.8549	31.231			52.95	0.81	17.02	10.67	0.31	3.4	6.39	3.72	2.38	0.24	1.53	99.42	n.g.	n.g.	29.96	230.5	16.6	17.27	7.69	48.63	123	21.88	224	255	72.11	100	14.21	9.75	667	19.82	52.27	8	35.72	9.87	1	10.02	1.9	12.14	2.65	7.53	1.15	7.49
Wang et al., 2017	Shaluli batholith	CJM17	Dioritic enclave	99.8549	31.231			56.32	0.86	16.86	9.48	0.26	2.89	5.49	3.66	2.54	0.26	1.42	100.04	n.g.	n.g.	19.9	192.1	8.81	15.78	4.39	15.89	134	21.86	231	248	37.3	89	12.2	10.19	880	17.17	40.56	5.4	22.79	5.79	0.75	5.6	0.99	6.27	1.34	3.86	0.59	3.92
Wang et al., 2017	Shaluli batholith	CJM03	Monzogranite	99.8549	31.231			71.4	0.38	13.66	3.85	0.07	0.98	2.53	3.14	3.06	0.07	0.27	99.41	n.g.	n.g.	8.54	35.6	26.31	5.42	5.35	3.87	57.63	16.29	138	188	19.17	174	9.67	3.62	997	28.26	54.24	5.78	20.67	3.86	0.82	3.67	0.58	3.48	0.74	2.1	0.31	2.03
Wang et al., 2017	Shaluli batholith	CJM09	Monzogranite	99.8549	31.231			71.52	0.32	14.03	3.49	0.06	0.79	2.31	3.19	3.57	0.07	0.43	99.78	n.g.	n.g.	7.95	31.11	17.75	4.78	4.2	4.61	53.35	15.59	146	176	19.35	110	8.51	3.61	993	30.39	53.53	5.91	20.41	3.67	0.76	3.48	0.56	3.25	0.73	2.05	0.33	2.08
Wang et al., 2017	Shaluli batholith	CJM10	Monzogranite	99.8549	31.231			67.09	0.48	15.62	4.9	0.08	1	2.83	3.72	3.68	0.09	0.32	99.81	n.g.	n.g.	6.36	36.49	25.23	6.14	4.98	4.59	60.72	19.28	183	187	16.45	220	12.86	8.01	816	71.71	127.4	12.58	40.07	5.42	0.78	4.69	0.53	2.86	0.61	1.78	0.28	1.97
Wang et al., 2017	Shaluli batholith	CJM11	Monzogranite	99.8549	31.231	236	2	72.7	0.28	13.55	3.26	0.06	0.66	2.15	3.19	3.84	0.06	0.18	99.93	n.g.	n.g.	5.74	24.85	37.47	3.85	3.15	3.21	45.14	14.78	165	147	14.51	96.46	7.7	3.78	797	26.45	47.07	5.06	17.46	2.96	0.63	2.75	0.41	2.54	0.54	1.62	0.24	1.62
Wang et al., 2017	Shaluli batholith	CJM12	Monzogranite	99.8549	31.231	235	4	71.43	0.48	13.98	4.13	0.07	1	2.76	3.65	1.74	0.1	0.51	99.85	n.g.	n.g.	9.83	44.25	34.08	5.83	3.77	6.07	57.64	16.63	129	128	21.53	150	12.58	6	470	28.73	53.52	5.73	20.07	3.85	0.58	3.68	0.61	3.66	0.79	2.31	0.36	2.4
Wang et al., 2017	Shaluli batholith	CJM14	Monzogranite	99.8549	31.231			72.65	0.27	13.67	3.13	0.06	0.68	2.33	3.06	3.72	0.06	0.28	99.91	n.g.	n.g.	5.89	26.33	40.75	4.04	4.19	8.03	46.29	14.61	151	160	14.99	126	7.05	4.2	771	36.91	68.65	6.97	22.97	3.51	0.67	3.16	0.42	2.61	0.54	1.59	0.26	1.69
Wang et al., 2017	Shaluli batholith	CJM19	Monzogranite	99.8549	31.231			69.01	0.39	14.57	4.23	0.09	1.16	3.41	3.08	3.21	0.09	0.28	99.52	n.g.	n.g.	11.81	45.81	30.51	6.28	4.86	5.18	52.57	15.74	132	169	26.01	190	8.57	4.33	643	30.64	60.92	6.96	25.12	5.24	0.81	4.89	0.78	4.75	0.98	2.77	0.42	2.73
Wang et al., 2017	Shaluli batholith	CJM22	Monzogranite	99.8549	31.231			70.87	0.3	13.87	3.84	0.08	1.04	2.93	2.94	3.55	0.08	0.3	99.8	n.g.	n.g.	10.53	45.42	30.71	6.39	4.78	3.47	58.82	16.42	148	185	23.68	165	8.86	4.91	885	42.16	80	8.67	29.63	5.23	0.86	4.67	0.71	4.23	0.88	2.48	0.37	2.43
Wang et al., 2013	Gacun	GB41	Basalt	n.g.*	n.g.			49.87	1.62	17.02	9.76	0.13	5.94	8.24	3.54	0.98	0.19	2.48	99.77	n.g.	n.g.	30.8	218	225.6	33	47.9	n.g.	n.g.	n.g.	12.6	294	29	142	14.6	n.g.	269	14.5	31.6	4.18	18	4.5	1.35	5.14	0.85	5.28	1.11	3.17	0.44	2.98
Wang et al., 2013	Gacun	GB42	Basalt	n.g.	n.g.			50.25	1.61	17.29	9.3	0.14	5.97	7.55	3.69	1.3	0.19	2.48	99.77	n.g.	n.g.	31.8	210	222.9	30.5	44.5	n.g.	n.g.	n.g.	18.2	279	28.3	136	14	n.g.	340	13.9	30.8	4.08	17.5	4.28	1.39	5.17	0.85	5.12	1.07	3.14	0.42	2.77
Wang et al., 2013	Gacun	GB50	Basalt	n.g.	n.g.			52.5	2.09	15	12.69	0.16	3.7	5.17	4.85	1.79	0.27	1.56	99.78	n.g.	n.g.	30.7	285	20	32	6.93	n.g.	n.g.	n.g.	56.8	163	32.1	160	12.2	n.g.	465	20.9	41.6	5.05	21.3	5.15	1.68	5.9	1.03	6.09	1.25	3.63	0.52	3.35
Wang et al., 2013	Gacun	GB55	Basalt	n.g.	n.g.			49.08	2.3	19.87	10.26	0.12	4.54	3.43	4.85	1.76	0.3	3.26	99.77	n.g.	n.g.	30.7	230	64.2	29.7	26.4	n.g.	n.g.	n.g.	61.6	309	35.4	232	21.3	n.g.	448	23.7	50	6.62	27.3	6.65	1.76	6.8	1.16	6.53	1.34	3.89	0.56	3.65
Wang et al., 2013	Gacun	GB60	Basalt	n.g.	n.g.			49.98	2.08	18.84	12.52	0.12	3.6	4.07	4.75	0.93	0.28	2.61	99.78	n.g.	n.g.	28.8	203	88.9	30.9	37.4	n.g.	n.g.	n.g.	32.1	381	36.9	210	16.9	n.g.	301	24.2	49.5	6.2	25.3	6.06	1.95	6.8	1.14	6.32	1.33	3.77	0.54	3.35
Wang et al., 2013	Gacun	GB179	Basalt	n.g.	n.g.			47.83	2.46	14.39	12.96	0.17	6.62	10.19	2.31	0.67	0.31	1.83	99.74	n.g.	n.g.	27.8	338	153	43.7	108	n.g.	n.g.	n.g.	17.3	603	27	166	22.6	n.g.	176	22.5	49	6.41	26.9	5.97	2.08	6.12	0.98	5.26	0.99	2.84	0.39	2.46
Wang et al., 2013	Gacun	GB180	Basalt	n.g.	n.g.			48.12	2.47	14.33	12.97	0.18	6.71	9.64	2.67	0.62	0.32	1.72	99.75	n.g.	n.g.	26.8	342	152	44.9	107	n.g.	n.g.	n.g.	17.3	564	26.7	167	22.3	n.g.	135	22.5	48.8	6.35	26.9	5.91	2.03	6.36	0.99	5.29	1	2.83	0.37	2.37
Wang et al., 2013	Gacun	GB181	Basalt	n.g.	n.g.			48.08	2.47	14.44	12.94	0.17	6.76	9.33	2.6	0.92	0.31	1.71	99.73	n.g.	n.g.	28.8	335	152	46.8	115	n.g.	n.g.	n.g.	24.4	431	26.2	161	22.6	n.g.	244	22.3	48.4	6.37	26.9	6.18	2.1	6.49	1	5.38	1.03	2.92	0.39	2.44
Wang et al., 2013	Gacun	GB190	Basalt	n.g.	n.g.			48.23	2.79	13.56	14.43	0.19	5.81	8.56	2.98	1	0.34	1.86	99.75	n.g.	n.g.	34	395	71.5	47.7	67.8	n.g.	n.g.	n.g.	23.3	226	33.2	199	27.9	n.g.	297	27.7	59.1	7.77	31.6	7.33	2.11	7.51	1.19	6.59	1.28	3.65	0.49	3.14
Wang et al., 2013	Gacun	GB191	Basalt	n.g.	n.g.			49.75	2.74	13.09	13.63	0.17	5.81	8.82	3.04	0.91	0.32	1.48	99.76	n.g.	n.g.	31.9	386	67.6	43	61.7	n.g.	n.g.	n.g.	20.7	440	31.9	199	27.4	n.g.	342	26.5	55.9	7.15	30.4	6.82	2.12	7.14	1.16	6.27	1.21	3.43	0.47	3.01
Wang et al., 2013	Gacun	GB192	Basalt	n.g.	n.g.			48.03	2.8	13.63	14.25	0.2	5.53	9.74	2.7	0.94	0.35	1.57	99.74	n.g.	n.g.	31.5	384	68.5	44.7	66	n.g.	n.g.	n.g.	26.2	275	32.8	203	27.9	n.g.	336	27	57	7.49	30.9	7.22	2.36	7.63	1.18	6.37	1.28	3.66	0.5	3.13
Wang et al., 2013	Gacun	GB193	Basalt	n.g.	n.g.			47.98	2.84	13.69	14.58	0.19	5.74	9.02	2.98	0.59	0.34	1.81	99.76	n.g.	n.g.	32.1	375	69	47	65.6	n.g.	n.g.	n.g.	11.9	344	32.1	201	28.1	n.g.	175	26.9	56.9	7.43	31.8	7.04	2.38	7.54	1.15	6.47	1.27	3.61	0.49	3.12
Wang et al., 2013	Gacun	GB194	Basalt	n.g.	n.g.			49.29	2.8	13.72	13.46	0.18	5.18	9.57	3.06	0.82	0.35	1.32	99.75	n.g.	n.g.	33.7	407	71	47.2	64.3	n.g.	n.g.	n.g.	20.1	397	35.4	217	29.8	n.g.	234	30.1	63.5	8.13	34.6	7.57	2.42	8.32	1.26	7.07	1.35	3.85	0.54	3.29
Wang et al., 2013	Gacun	GB195	Basalt	n.g.	n.g.			46.88	2.85	13.81	14.27	0.2	5.88	11.03	2.36	0.41	0.33	1.71	99.73	n.g.	n.g.	31.2	391	81.5	46.4	74.6	n.g.	n.g.	n.g.	7.73	626	31.6	189	26.6	n.g.	119	25.9	54.9	7.24	29.7	7.06	2.22	7.32	1.13	6.27	1.22	3.58	0.48	3.01
Wang et al., 2013	Gacun	GB44	Andesite/dacite	n.g.	n.g.			58.94	1.47	15.98	8.16	0.21	3.26	3.22	3.29	3.25	0.21	1.83	99.82	n.g.	n.g.	22.2	117	23.8	20.3	8.58	n.g.	n.g.	n.g.	89.1	246	35.1	230	15.6	n.g.	515	29.6	55.8	7.06	27.6	5.99	1.48	6.68	1.1	6.17	1.27	3.72	0.52	3.32
Wang et al., 2013	Gacun	GB47	Andesite/dacite	99.5497	31.1898	230.6	1.3	63.92	0.69	16.83	3.78	0.04	2.47	2.55	4.58	3.18	0.12	1.69	99.85	n.g.	n.g.	20.3	93.4	20.4	9.55	4.71	n.g.	n.g.	n.g.	52.8	202	25.4	144	12.8	n.g.	527	28.4	51.2	5.56	20.1	3.95	0.99	4.02	0.69	3.95	0.86	2.78	0.41	2.88
Wang et al., 2013	Gacun	GB54	Andesite/dacite	n.g.	n.g.			54.2	1.71	14.77	10.39	0.16	5.24	4.85	4.14	1.2	0.24	2.89	99.79	n.g.	n.g.	32.9	248	59.1	28.4	9.83	n.g.	n.g.	n.g.	61.3	223	32.4	151	10.4	n.g.	100	19.8	40.1	4.91	20.9	5	1.6	5.83	0.98	5.93	1.24	3.5	0.5	3.19
Wang et al., 2013	Gacun	GB56	Andesite/dacite	n.g.	n.g.			55.25	1.83	16.89	10.97	0.14	4.72	1.98	4.35	0.34	0.24	3.09	99.8	n.g.	n.g.	26	195	80	31.5	35	n.g.	n.g.	n.g.	12.5	237	27.7	195	15.7	n.g.	90.5	18.8	40.6	5.06	21	5.03	1.42	5.52	0.91	5.2	1.04	3.06	0.44	2.89
Wang et al., 2013	Gacun	GB57	Andesite/dacite	n.g.	n.g.			57.2	0.98	16.82	6.99	0.09	2.53	6	3.14	2.06	0.21	3.81	99.83	n.g.	n.g.	21.3	114	16.7	20.6	10.6	n.g.	n.g.	n.g.	80.8	350	33	234	14.6	n.g.	445	29	55.6	6.59	25.5	5.6	1.56	6.04	0.98	5.6	1.15	3.5	0.47	3.2
Wang et al., 2013	Gacun	GB58	Andesite/dacite	n.g.	n.g.			53.12	1.79	17.96	8.42	0.13	3.37	4.82	5.93	0.89	0.22	3.14	99.79	n.g.	n.g.	28	178	39	18.6	12.8	n.g.	n.g.	n.g.	14.8	295	29.9	179	12.3	n.g.	391	22.8	39.5	4.99	20.6	4.75	1.51	5.64	0.92	5.3	1.08	3.26	0.45	2.86
Wang et al., 2013	Gacun	GB59	Andesite/dacite	n.g.	n.g.			54.04	1.79	18.58	9.31	0.12	2.79	5.5	2.72	2.13	0.3	2.52	99.8	n.g.	n.g.	24.3	174	44.7	22.3	17.3	n.g.	n.g.	n.g.	53.5	380	32.7	235	20	n.g.	546	29.7	56.8	6.9	28	6.14	1.86	6.58	1.08	6.33	1.27	3.77	0.52	3.39
Wang et al., 2013	Gacun	GB61	Andesite/dacite	n.g.	n.g.			66	0.62	15.46	3.57	0.03	2.02	2.85	3.81	3.46	0.11	1.92	99.85	n.g.	n.g.	18.2	84.4	18.2	7.61	4.6	n.g.	n.g.	n.g.	93.8	171	19.1	138	12.3	n.g.	624	25.5	47.7	5.15	18.4	3.73	0.86	3.5	0.59	3.23	0.64	2.02	0.3	1.92
Wang et al., 2013	Gacun	GB62	Andesite/dacite	n.g.	n.g.			61.31	0.71	16.13	4.43	0.06	2.24	5.01	3.83	3.13	0.13	2.86	99.84	n.g.	n.g.	19.6	89.5	25.1	11.5	5.83	n.g.	n.g.	n.g.	63.8	202	21.6	136	13.7	n.g.	480	26.2	49	5.57	19.7	4.21	1.01	4.18	0.63	3.59	0.74	2.24	0.34	2.27
Wang et al., 2013	Gacun	GB63	Andesite/dacite	n.g.	n.g.			61	0.78	17.7	5.11	0.09	2.36	3.28	4.22	3.66	0.14	1.47	99.81	n.g.	n.g.	21.1	95.5	18.6	12	5.21	n.g.	n.g.	n.g.	90.1	182	19.5	161	14.6	n.g.	664	26.5	51.6	5.74	20.6	4.39	1.02	4.27	0.68	3.55	0.7	2.06	0.3	1.88
Wang et al., 2013	Gacun	GB64	Andesite/dacite	n.g.	n.g.			65.16	0.55	15.23	5.11	0.04	2.51	5.04	3.22	1.2	0.1	1.66	99.82	n.g.	n.g.	15.1	76.6	17.4	9	5.59	n.g.	n.g.	n.g.	23	237	16.8	134	12.1	n.g.	276	27.6	49.6	5.39	18.9	3.84	0.84	3.6	0.58	3.09	0.62	1.77	0.26	1.67
Wang et al., 2013	Gacun	GB65	Andesite/dacite	n.g.	n.g.			57.63	0.98	16.99	6.8	0.1	2.59	5.11	3.28	2.84	0.21	3.28	99.81	n.g.	n.g.	19	105	14.5	16.6	8.56	n.g.	n.g.	n.g.	93.9	235	27.9	205	12.8	n.g.	414	26.1	49.4	5.82	21.8	4.96	1.37	5.3	0.89	4.94	0.99	2.99	0.43	2.84
Wang et al., 2013	Gacun	GB69	Andesite/dacite	n.g.	n.g.			61.83	0.52	19.29	4.37	0.1	1.22	3.08	5.54	2.18	0.11	1.6	99.84	n.g.	n.g.	16.2	57.3	3.79	6.83	12.2	n.g.	n.g.	n.g.	40.3	400	15.1	165	13.6	n.g.	671	38.2	67.8	7.14	22.9	4.26	1.08	3.82	0.6	3	0.58	1.68	0.25	1.63
Wang et al., 2013	Gacun	GB72	Andesite/dacite	n.g.	n.g.			63.1	0.72	16.99	5.33	0.08	1.51	3.04	3.29	3.02	0.11	2.66	99.85	n.g.	n.g.	20.5	127	14.1	13	4.79	n.g.	n.g.	n.g.	104	190	24	186	12.3	n.g.	647	25.8	50.5	5.83	21.6	4.58	1.03	4.4	0.74	4.11	0.83	2.53	0.37	2.47
Wang et al., 2013	Gacun	GB169	Andesite/dacite	n.g.	n.g.			65.32	0.73	15.52	4.77	0.1	1.56	2.55	5.25	2.76	0.15	1.87	100.58	n.g.	n.g.	16.3	55	23.6	8.1	8.95	n.g.	n.g.	n.g.	84.3	187	28.9	230	16.6	n.g.	571	34.8	63.4	6.98	25.3	5.14	1.14	5.04	0.85	4.8	0.98	3.04	0.43	2.76
Wang et al., 2013	Gacun	GB89	Rhyolite	99.3237	31.0886	230	2.5	74.59	0.11	12.17	1.06	0.09	0.53	2.9	1.43	3.36	0.02	3.66	99.92	n.g.	n.g.	5.21	4.66	1.13	0.62	1.45	n.g.	n.g.	n.g.	186	210	9.16	77.8	12.5	n.g.	734	36.4	54	4.81	13.3	1.89	0.38	1.84	0.26	1.31	0.28	0.95	0.14	1.04
Wang et al., 2013	Gacun	GB91	Rhyolite	n.g.	n.g.			80.68	0.09	11.36	0.76	0.27	0	0.1	4.48	1.76	0.02	0.4	99.92	n.g.	n.g.	7.77	4.01	0.16	0.38	0.04	n.g.	n.g.	n.g.	56.3	114	6.86	67.5	9.2	n.g.	978	30.5	40.5	3.98	11	1.54	0.32	1.16	0.2	0.98	0.21	0.66	0.1	0.72
Wang et al., 2013	Gacun	GB92	Rhyolite	n.g.	n.g.			79	0.11	12.46	0.77	0.25	0.03	0.57	4.75	1.5	0.02	0.48	99.94	n.g.	n.g.	7.29	3.07	3	0.59	1.29	n.g.	n.g.	n.g.	51	349	8	83.2	11.2	n.g.	1022	34.7	50.2	4.37	12.2	1.6	0.33	1.4	0.22	1.1	0.23	0.8	0.12	0.87
Wang et al., 2013	Gacun	GB93	Rhyolite	n.g.	n.g.			77.08	0.11	12.5	0.72	0.47	0.01	0.36	1.17	6.49	0.01	0.99	99.91	n.g.	n.g.	7.06	3.56	0.54	0.29	0.31	n.g.	n.g.	n.g.	263	121	9.16	80.9	12.2	n.g.	2444	39.5	59.2	5.2	14.5	2.05	0.35	1.68	0.27	1.33	0.29	0.92	0.14	1.03
Wang et al., 2013	Gacun	GB94	Rhyolite	n.g.	n.g.			78.71	0.1	11.92	0.61	0.47	0	0.04	0.56	6.72	0.01	0.78	99.92	n.g.	n.g.	6.83	4.12	3.41	0.32	1.51	n.g.	n.g.	n.g.	345	72.1	7.97	83.7	14	n.g.	3600	37.2	55.6	4.97	14.2	1.97	0.36	1.8	0.24	1.18	0.23	0.81	0.12	0.9
Zhu et al., 2019	Dongcuo batholith	LTW01	Monzogranite	99.99	30.1702			69.12	0.45	14.94	3.86	0.06	1.06	3.59	3.38	2.62	0.1	0.43	99.61	26.9	2.05	10.8	44.2	9.53	106	5.31	2.94	51.9	17.6	106	185	22.1	168	11.1	2.62	624	29.3	54.9	5.84	21.6	4.19	1.03	3.96	0.6	3.65	0.74	2.1	0.31	2.03
Zhu et al., 2019	Dongcuo batholith	LTW03	Monzogranite	99.99	30.1702			68.42	0.44	15.59	3.85	0.06	1.02	3.7	3.56	2.73	0.1	0.45	99.92	26.7	2.16	10.9	43.4	8.54	90	4.15	3.22	52.3	18.2	106	192	23	193	10.9	2.58	622	35.6	67.1	7.01	25.5	4.62	1.07	4.31	0.63	3.8	0.76	2.18	0.33	2.1
Zhu et al., 2019	Dongcuo batholith	LTW04	Monzogranite	99.99	30.1702	206.1	1	68.85	0.46	15.23	4.01	0.06	1.07	3.56	3.57	2.84	0.11	0.43	100.19	28.4	1.88	9	45.9	10.4	117	5.03	2.95	55.5	17.9	102	188	20.1	195	11.2	2.69	769	36.1	67.4	6.91	24.8	4.29	1.06	3.93	0.56	3.32	0.66	1.92	0.29	1.87
Zhu et al., 2019	Dongcuo batholith	LTW08	Monzogranite	99.99	30.1702			67.12	0.5	15.96	4.26	0.07	1.14	3.71	3.6	2.95	0.12	0.48	99.91	29.2	1.98	8.92	46.6	9.67	76.5	4.84	2.78	55.4	18.7	105	197	20.4	189	11.7	3.1	792	37.2	69.2	7.14	25.5	4.44	1.12	4.02	0.57	3.4	0.68	1.95	0.29	1.91
Zhu et al., 2019	Dongcuo batholith	LTW09	Monzogranite	99.99	30.1702			69.13	0.45	14.98	3.82	0.06	1.03	3.6	3.41	2.54	0.1	0.42	99.54	27	2.08	10.2	44.1	10.5	124	5.36	3.06	51.6	17.6	104	186	21.7	181	11	2.57	603	27.1	51.1	5.48	20.6	4.08	1.04	3.89	0.59	3.6	0.73	2.09	0.3	2
Zhu et al., 2019	Dongcuo batholith	LTW10	Monzogranite	99.99	30.1702			68.9	0.49	15.15	4.31	0.07	1.17	3.68	3.39	2.81	0.11	0.39	100.47	29.3	1.89	10.7	49.7	10.9	102	4.91	3.42	57.5	17.9	107	187	22.9	216	11.8	2.71	743	31.3	59.2	6.28	23.1	4.41	1.06	4.16	0.63	3.79	0.77	2.23	0.33	2.17
Peng et al., 2014; Fang, 2017	Dongcuo batholith	YD-61	Granite	99.9304	30.1988	216.6	0.8	67.41	0.55	15.4	4.35	0.07	1.26	3.62	3.39	2.74	0.11	0.51	99.41	n.g.	n.g.	9.54	40	9.24	6.23	3.72	n.g.	n.g.	n.g.	99	190	23.5	210	10.5	n.g.	780	35.7	71.2	8.06	30.1	5.75	1.2	5.57	0.86	4.99	1.02	2.77	0.38	2.46
	Dongcuo batholith	YD-62	Granite	n.g.	n.g.			66.58	0.6	15.65	4.69	0.08	1.35	3.68	3.44	2.71	0.11	0.54	99.43	n.g.	n.g.	5.49	21.2	6.55	3.48	2.03	n.g.	n.g.	n.g.	52.2	93.2	13.3	12.2	5.53	n.g.	369	15.6	32.2	3.76	15.1	3.06	0.59	3.06	0.49	2.91	0.6	1.57	0.22	1.39
	Dongcuo batholith	YD-63	Granite	n.g.	n.g.			67.87	0.57	14.99	4.52	0.08	1.27	3.57	3.37	2.56	0.11	0.51	99.42	n.g.	n.g.	5.24	21.3	5.14	3.31	1.9	n.g.	n.g.	n.g.	50.8	92.2	12.4	121	5.34	n.g.	366	14.6	30.5	3.55	13.7	2.76	0.58	2.76	0.43	2.59	0.55	1.5	0.21	1.38
	Dongcuo batholith	YD-64	Granite	n.g.	n.g.			67	0.52	15.8	4.05	0.07	1.17	3.91	3.87	2.35	0.1	0.58	99.42	n.g.	n.g.	9.23	42.3	9.71	6.37	4.56	n.g.	n.g.	n.g.	97.8	204.8	22.6	216	10.1	n.g.	645	36	71.9	7.88	29.9	5.34	1.19	5.18	0.77	4.62	0.97	2.64	0.37	2.35
Peng et al., 2014; Fang, 2017	Dongcuo batholith	SJ-206	Granite	100.082	29.3172	214.7	2.6	75.57	0.12	13.06	1.19	0.04	0.21	1.26	3.38	4.22	0.02	0.35	99.42	n.g.	n.g.	4.29	5.69	1.49	1.07	1.54	n.g.	n.g.	n.g.	166	62.3	28.1	111	7.52	n.g.	557	23.4	44.2	4.69	16.7	3.76	0.39	3.61	0.68	4.29	0.98	2.98	0.47	3.14
	Dongcuo batholith	SJ-207	Granite	n.g.	n.g.			74.96	0.14	13.14	1.43	0.04	0.23	1.14	3.32	4.61	0.02	0.39	99.42	n.g.	n.g.	5.31	6.54	1.36	1.12	1.2	n.g.	n.g.	n.g.	189	52	28	118	8.99	n.g.	467	23.2	44.3	4.78	17	3.66	0.34	3.69	0.66	4.01	0.94	2.92	0.47	3.12
	Dongcuo batholith	SJ-209	Granite	100.077	29.3106	223.9	3.9	69.39	0.4	15.34	3.12	0.06	0.85	3.33	3.57	2.88	0.07	0.4	99.41	n.g.	n.g.	9.45	31.6	6.67	5.1	3.99	n.g.	n.g.	n.g.	103	168	20.1	157	9.42	n.g.	630	35.7	64.1	6.6	23.2	4.25	0.99	3.92	0.59	3.31	0.74	2.07	0.29	1.96
	Dongcuo batholith	SJ-210	Granite	n.g.	n.g.			69.26	0.43	15.14	3.35	0.06	0.9	3.18	3.41	3.23	0.08	0.38	99.42	n.g.	n.g.	8.4	32.6	6.33	5.69	4.17	n.g.	n.g.	n.g.	118	169	20.9	124	10.4	n.g.	802	31.6	57.7	6.01	21.4	4.17	1.02	3.99	0.62	3.46	0.78	2.19	0.32	2.13
	Dongcuo batholith	SJ-212	Granite	n.g.	n.g.			76.68	0.06	12.12	1.56	0.04	0.09	0.64	3.26	4.64	0	0.33	99.42	n.g.	n.g.	5.16	2.04	/	0.27	0.405	n.g.	n.g.	n.g.	230	18.3	41.1	81.3	9.86	n.g.	135	14.1	30.1	3.53	13.4	3.91	0.15	4.46	0.9	5.87	1.39	4.2	0.66	4.59
	Dongcuo batholith	SJ-213	Granite	n.g.	n.g.			75.94	0.06	12.43	1.71	0.04	0.1	0.75	3.27	4.8	0.01	0.32	99.43	n.g.	n.g.	5.34	2.28	1.22	0.3	1.17	n.g.	n.g.	n.g.	230	21.9	38.3	102	9.37	n.g.	162	16.6	33.8	3.92	14.5	3.85	0.16	4.14	0.81	5.25	1.25	3.9	0.63	4.32
	Dongcuo batholith	SJ-214	Granite	n.g.	n.g.			71.09	0.39	14.06	3	0.06	1.01	2.62	3.16	3.41	0.07	0.54	99.41	n.g.	n.g.	8.61	35.9	10.3	5.74	4.96	n.g.	n.g.	n.g.	136	131	23.8	161	11.1	n.g.	555	29.8	55.2	5.79	20.6	4.08	0.72	3.84	0.66	3.74	0.85	2.39	0.36	2.48
	Dongcuo batholith	SJ-215	Granite	n.g.	n.g.			70.53	0.37	14.59	2.71	0.05	0.91	2.59	3.26	3.88	0.07	0.46	99.42	n.g.	n.g.	8.06	32.5	10.1	5.07	5.09	n.g.	n.g.	n.g.	142	138	21.3	147	10.3	n.g.	635	27.8	50.4	5.37	19.2	3.8	0.79	3.72	0.61	3.62	0.79	2.17	0.32	2.22
	Dongcuo batholith	SJ-216	Granite	n.g.	n.g.			75.8	0.14	12.79	1.12	0.03	0.21	1.02	3.35	4.59	0.02	0.34	99.41	n.g.	n.g.	5.65	8.29	1.26	1.2	1.44	n.g.	n.g.	n.g.	208	45.2	23	112	9.35	n.g.	350	21.7	41.5	4.42	15.8	3.43	0.34	3.28	0.57	3.41	0.81	2.41	0.37	2.69
	Dongcuo batholith	SJ-218	Granite	n.g.	n.g.			74.92	0.17	13.2	1.46	0.03	0.27	1.3	3.49	4.29	0.03	0.25	99.41	n.g.	n.g.	5.89	9.86	2.59	1.6	2.03	n.g.	n.g.	n.g.	177	63.6	28	113	9.4	n.g.	462	27.5	52.7	5.66	19.9	4.18	0.41	3.92	0.71	4.07	0.93	2.68	0.4	2.76
	Dongcuo batholith	YD-65	Granite	100.351	29.6419	216.9	0.8	75.38	0.11	13.31	0.94	0.03	0.21	1.37	3.13	4.43	0.02	0.5	99.43	n.g.	n.g.	4.23	9.81	11.1	1.43	1.16	n.g.	n.g.	n.g.	217	73.8	32.2	98.3	7.37	n.g.	265	19.9	42.2	5.09	19.6	4.59	0.48	4.67	0.86	5.77	1.23	3.66	0.56	3.69
	Dongcuo batholith	YD-66	Granite	n.g.	n.g.			76.89	0.15	11.97	1.19	0.04	0.23	1.27	2.91	3.91	0.02	0.85	99.43	n.g.	n.g.	2.84	7.92	5.89	1.01	0.76	n.g.	n.g.	n.g.	206	55.4	31.8	112	8.82	n.g.	236	21.8	47.4	5.69	22.1	5.17	0.42	5.3	0.91	6.06	1.29	3.69	0.56	3.66
	Dongcuo batholith	YD-67	Granite	n.g.	n.g.			70.62	0.24	14.59	2.02	0.05	0.42	1.91	3.43	4.39	0.04	1.73	99.44	n.g.	n.g.	5.4	15.3	4.18	2.06	1.64	n.g.	n.g.	n.g.	242	90.4	47.2	144	12.5	n.g.	283	33	70.3	8.22	30.8	7.03	0.62	7.09	1.27	8.28	1.83	5.34	0.84	5.48
	Dongcuo batholith	YD-68	Granite	n.g.	n.g.			75	0.11	13.25	1.15	0.06	0.22	1.1	3.22	4.83	0.02	0.47	99.43	n.g.	n.g.	1.38	2.51	2.18	0.42	0.51	n.g.	n.g.	n.g.	126	22.1	20.1	46.2	4.89	n.g.	97.6	9.7	21.5	2.68	10.8	2.97	0.16	3.1	0.58	3.9	0.84	2.44	0.37	2.43
	Dongcuo batholith	YD-69	Granite	n.g.	n.g.			75.46	0.1	13.14	1.01	0.05	0.18	1.04	3.27	4.75	0.01	0.4	99.41	n.g.	n.g.	2.63	4.36	2.19	0.73	0.59	n.g.	n.g.	n.g.	250	37.2	45.8	101	9.55	n.g.	129	18.7	42.6	5.42	22.5	6.15	0.28	6.96	1.32	8.68	1.88	5.4	0.77	4.84
	Dongcuo batholith	YD-70	Granite	n.g.	n.g.			73.78	0.17	13.66	1.59	0.05	0.32	1.53	3.25	4.58	0.03	0.47	99.43	n.g.	n.g.	4.29	9.79	7.76	1.31	2.95	n.g.	n.g.	n.g.	204	76	38.4	138	10.6	n.g.	315	36.7	78.3	9.52	36.9	8.28	0.53	8.54	1.41	8.72	1.71	4.66	0.65	4.19
	Dongcuo batholith	YD-72	Granite	n.g.	n.g.			72.46	0.23	14.27	1.75	0.04	0.4	1.69	3.03	5.05	0.05	0.44	99.41	n.g.	n.g.	2.3	7.73	1.71	1.01	0.71	n.g.	n.g.	n.g.	96.8	59.4	13	65.7	4.42	n.g.	266	11.6	24.5	2.88	11.2	2.51	0.4	2.57	0.43	2.67	0.54	1.58	0.22	1.41
	Dongcuo batholith	YD-74	Granite	n.g.	n.g.			76.03	0.13	12.85	1.2	0.04	0.23	1.29	2.94	4.37	0.02	0.33	99.43	n.g.	n.g.	1.55	3.13	0.87	0.52	0.68	n.g.	n.g.	n.g.	98.2	33	16.3	50.5	4.71	n.g.	99.2	10.6	21.7	2.63	10.3	2.43	0.23	2.69	0.48	3.25	0.67	1.88	0.28	1.76
	Dongcuo batholith	YD-76	Granite	n.g.	n.g.			73.89	0.25	13.34	2.01	0.05	0.48	1.65	2.98	4.28	0.05	0.45	99.43	n.g.	n.g.	5.24	16.4	3.05	2.21	1.45	n.g.	n.g.	n.g.	175	99.6	19.9	143	10.1	n.g.	453	23.1	48.4	5.32	19.1	3.93	0.7	4.1	0.68	4.27	0.88	2.51	0.37	2.51
	Dongcuo batholith	YD-78	Granite	n.g.	n.g.			71.09	0.46	13.75	3.54	0.06	1.02	2.88	3.01	2.94	0.08	0.57	99.4	n.g.	n.g.	8.01	32.1	8.98	5.26	3.46	n.g.	n.g.	n.g.	126	141	23.5	172	10.6	n.g.	610	36.5	70.7	7.78	28.5	5.2	0.87	5.04	0.79	4.85	1	2.8	0.42	2.65
	Dongcuo batholith	YD-80	Granite	n.g.	n.g.			68.41	0.48	15.07	3.62	0.08	1.21	2.97	3.51	3.44	0.09	0.54	99.42	n.g.	n.g.	7.38	38.7	11.7	5.65	4.56	n.g.	n.g.	n.g.	154	142	30.4	180	12.8	n.g.	566	46.4	88.9	9.94	35.8	6.33	0.83	6.21	0.99	6.05	1.26	3.66	0.55	3.63
He et al., 2013	Dongcuo batholith	DC0901	Granite	n.g.	n.g.			70.66	0.4	14.7	3.16	0.06	0.94	3.07	3.26	2.85	0.08	0.62	99.8	n.g.	n.g.	12.6	31.4	9.04	5.5	3.47	1.19	41.6	16.9	112	154	25	151	10.1	3.59	601	29.1	53.8	5.94	21.9	4.3	0.936	4.01	0.7	4.06	0.89	2.53	0.368	2.58
He et al., 2013	Dongcuo batholith	DC0902	Granite	n.g.	n.g.			70.62	0.38	14.59	3.06	0.06	0.9	2.99	3.33	3.04	0.07	0.62	99.66	n.g.	n.g.	11.1	29.9	7.37	5.16	2.28	0.935	36.4	16.4	124	147	26.4	155	10.3	2.73	597	29.1	53.4	5.95	21.5	4.28	0.856	3.96	0.694	4.2	0.923	2.64	0.385	2.72
He et al., 2013	Dongcuo batholith	DC0903	Granite	n.g.	n.g.			69.75	0.43	14.85	3.37	0.06	1.11	3.28	3.33	2.72	0.09	0.74	99.73	n.g.	n.g.	13.1	34.5	14	6.38	4.42	1.93	41.5	16.5	111	157	22.4	176	10.7	3.28	556	28.4	52.2	5.63	20.5	4.11	0.881	3.89	0.657	3.72	0.842	2.3	0.338	2.29
He et al., 2013	Dongcuo batholith	DC0904	Granite	n.g.	n.g.			69.24	0.44	14.67	3.39	0.06	1.25	3.32	3.08	3.11	0.09	0.64	99.29	n.g.	n.g.	12.8	39.2	20.3	6.84	5.8	1.82	41.7	15.9	117	154	22.5	146	10.5	3.32	583	27.8	51.6	5.88	21.1	4.18	0.87	4.17	0.693	3.92	0.829	2.17	0.316	2.1
He et al., 2013	Dongcuo batholith	DC0905	Granite	n.g.	n.g.			69.63	0.39	14.82	2.98	0.06	1.13	2.65	2.98	4.39	0.08	0.67	99.78	n.g.	n.g.	11.4	35	19.6	6.01	6.57	1.16	34.2	14.9	136	139	24.3	139	9.35	3.18	839	22.3	43.4	4.93	18.5	4.09	0.774	3.9	0.672	3.99	0.858	2.47	0.344	2.43
He et al., 2013	Dongcuo batholith	DC0906	Granite	n.g.	n.g.			68.96	0.43	15.01	3.34	0.07	1.23	2.94	3.23	3.57	0.09	0.6	99.47	n.g.	n.g.	11.1	38.6	15.7	6.51	4.13	2.63	36.4	15.6	138	145	25.1	164	10.7	4.3	642	28.2	52	5.79	20.6	4.19	0.82	3.93	0.664	3.84	0.867	2.47	0.363	2.57
He et al., 2013	Dongcuo batholith	DC0907	Granite	n.g.	n.g.			69.7	0.44	14.71	3.35	0.06	1.33	3.12	3.15	3.29	0.08	0.6	99.83	n.g.	n.g.	12.9	40.4	19.3	7.1	5.31	0.771	36.8	16	134	139	25.2	161	10.8	4.81	541	27.2	52.1	5.72	21.2	4.27	0.807	4.14	0.713	4	0.882	2.5	0.386	2.54
He et al., 2013	Dongcuo batholith	DC0908	Granite	n.g.	n.g.			69.5	0.41	15.07	3.12	0.06	1.1	2.97	3.27	3.67	0.08	0.53	99.78	n.g.	n.g.	12.2	38.7	19.8	6.59	5.7	0.836	33.8	16.5	142	159	25.1	158	10.7	3.56	636	21.5	41.1	4.52	17.5	3.85	0.87	3.69	0.663	4	0.887	2.49	0.369	2.53
He et al., 2013	Dongcuo batholith	DC0909	Granite	n.g.	n.g.			71.71	0.32	14.32	2.47	0.05	0.86	2.44	3.13	3.89	0.07	0.63	99.89	n.g.	n.g.	9.59	29.5	14.7	4.69	4.28	n.g.	31.7	15.1	150	130	23.1	161	9.56	3.55	609	23	42.8	4.95	17.5	3.55	0.731	3.45	0.591	3.53	0.807	2.27	0.367	2.57
He et al., 2013	Dongcuo batholith	DC0910	Granite	100.155	29.3942	215	1.5	72.77	0.26	14.04	2.07	0.05	0.64	1.93	3.14	4.27	0.06	0.61	99.84	n.g.	n.g.	8.58	20.7	14.7	3.46	3.52	n.g.	25.7	15.1	176	111	23.8	134	10	5.52	581	24.9	46.6	5.13	17.9	3.79	0.659	3.39	0.579	3.54	0.776	2.34	0.372	2.48
He et al., 2013	Dongcuo batholith	DC0911	Granite	n.g.	n.g.			73.02	0.22	14.13	1.86	0.05	0.49	1.63	3.29	4.45	0.05	0.64	99.83	n.g.	n.g.	7.41	15.8	10.6	2.42	3.52	0.324	28	14.8	189	108	29.5	135	12.6	4.63	471	29	53.8	5.74	19.9	4.09	0.559	4.02	0.727	4.34	0.989	2.78	0.446	3.12
He et al., 2013	Dongcuo batholith	DC0912	Granite	n.g.	n.g.			69.64	0.42	15.08	3.31	0.06	1.05	3.29	3.45	2.95	0.08	0.55	99.88	n.g.	n.g.	14.2	36	24.5	6.36	6.38	0.707	42.5	17.1	120	157	27.6	172	11.2	4.47	537	27	49.1	5.66	21.2	4.59	0.905	4.45	0.775	4.43	0.998	2.68	0.386	2.79
He et al., 2013	Dongcuo batholith	DC0913	Granite	n.g.	n.g.			67.55	0.52	15.43	3.95	0.07	1.55	3.39	3.18	3.45	0.09	0.63	99.81	n.g.	n.g.	13.8	51.2	29.5	10.2	7.25	1.7	47.2	17.4	140	155	28.7	179	12.3	4.95	615	20.4	40.9	4.62	18.3	4.25	0.905	4.31	0.732	4.34	0.989	2.76	0.42	2.89
He et al., 2013	Dongcuo batholith	DC0914	Granite	n.g.	n.g.			70.5	0.32	15.04	2.46	0.06	0.73	2.18	3.48	4.24	0.06	0.56	99.63	n.g.	n.g.	8.6	24.6	22.6	4.06	5.71	n.g.	33.9	16	172	107	25.1	167	11.6	4.31	398	32	61.3	6.53	23.5	4.69	0.595	4	0.686	3.82	0.863	2.45	0.375	2.68
He et al., 2013	Dongcuo batholith	DC0915	Granite	n.g.	n.g.			72.49	0.23	13.5	1.84	0.04	0.58	1.83	3.07	4.33	0.05	0.5	98.46	n.g.	n.g.	7.71	19.3	22.2	3.36	6.96	0.169	26.8	14.6	173	114	21.9	122	9.07	4.03	536	24.8	45.4	4.87	17.2	3.45	0.608	3.1	0.545	3.2	0.712	2.05	0.326	2.23
He et al., 2013	Dongcuo batholith	DC0916	Granite	n.g.	n.g.			71.17	0.28	14.91	2.26	0.05	0.71	2.25	3.32	4.23	0.06	0.55	99.79	n.g.	n.g.	8.85	23.4	16.7	4	4.86	n.g.	32.4	15.5	170	125	26.2	126	10.1	4.44	618	27.7	52.3	5.59	20	4.12	0.736	3.78	0.665	3.94	0.916	2.57	0.393	2.68
He et al., 2013	Dongcuo batholith	DC0917	Granite	n.g.	n.g.			69.67	0.37	15.33	2.98	0.06	0.78	2.78	3.66	3.45	0.07	0.55	99.7	n.g.	n.g.	11.3	24.8	16.5	4.86	4.24	n.g.	40.1	17.2	129	143	24.1	160	10.7	4.38	674	27.5	50.7	5.66	20	4.12	0.872	3.84	0.648	3.74	0.855	2.41	0.34	2.46
He et al., 2013	Dongcuo batholith	DC0918	Granite	n.g.	n.g.			68.55	0.44	15.64	3.44	0.06	0.98	3.24	3.59	3.11	0.09	0.64	99.78	n.g.	n.g.	9.48	27	7.98	4.53	2.23	0.192	33.3	13.6	89	134	17.3	142	8.05	2.38	667	21.3	39.6	4.37	15.7	3.2	0.796	2.95	0.512	2.96	0.644	1.77	0.256	1.74
He et al., 2013	Dongcuo batholith	DC0919	Granite	n.g.	n.g.			74.5	0.16	13.46	1.73	0.04	0.28	1.24	3.37	4.28	0.03	0.47	99.56	n.g.	n.g.	8.7	8.42	15.7	1.71	2.73	n.g.	23.1	14.7	174	63.8	26.3	114	9.08	4.75	544	24.8	46.3	5.24	18.5	3.88	0.378	3.69	0.677	3.9	0.908	2.57	0.401	2.87
He et al., 2013	Dongcuo batholith	DC0922	Granite	100.077	29.3043	216	0.7	71	0.29	15.17	2.48	0.05	0.54	2.59	3.81	3.28	0.06	0.56	99.83	n.g.	n.g.	8.57	18	6.94	3.23	2.19	n.g.	30.2	16.2	111	137	25.8	138	9	2.92	972	34.6	64.1	6.85	24.7	4.73	0.762	4.22	0.723	4.22	0.924	2.64	0.359	2.51
He et al., 2013	Dongcuo batholith	DC0923	Granite	n.g.	n.g.			73.5	0.21	13.82	2.01	0.04	0.35	1.56	3.4	4.22	0.04	0.58	99.73	n.g.	n.g.	5.2	8.64	5.22	1.55	1.25	n.g.	19.5	11.2	119	58.6	23.6	105	7.69	2.48	528	25.7	48.1	5.25	18.4	3.6	0.408	3.51	0.597	3.62	0.846	2.34	0.342	2.42
He et al., 2013	Dongcuo batholith	DC0924	Granite	n.g.	n.g.			75.69	0.15	12.71	1.64	0.04	0.28	1.26	3.27	4.04	0.03	0.36	99.47	n.g.	n.g.	5	6.76	3.99	1.17	1.12	n.g.	12.3	9.83	143	42.3	18.9	95.6	7.94	3.09	280	18.4	35.6	3.97	14.7	3.19	0.305	2.91	0.515	3.13	0.683	1.99	0.29	2.01
Wu et al., 2017	Dongcuo batholith	HZS-1	Granodiorite	100.128	29.3583			72.4	0.4	13.56	3.25	0.05	0.94	2.68	2.73	3.37	0.11	0.32	99.81	29.99	n.g.	10.58	36.6912	16.68	6.146	3.097	n.g.	n.g.	n.g.	119.035	131.3	25.03	153.8	11.02	4.159	673	41.2	75.6	8.264	27.11	5.17085	1.00795	4.892	0.75007	4.397	0.875	2.573	0.411	2.578
Wu et al., 2017	Dongcuo batholith	HZS-6	Granodiorite	100.144	29.3758			71.97	0.4	13.87	3.17	0.06	0.97	2.98	2.85	3.1	0.11	0.33	99.81	35.22	n.g.	10.55	35.82	23.13	6.324	3.526	n.g.	n.g.	n.g.	122.74	135.8	28.23	155.6	10.67	4.773	619.3	37.23	68.26	7.656	26.04	5.244	1.03265	5.073	0.8132	4.861	0.998	2.853	0.463	2.911
Wu et al., 2017	Dongcuo batholith	HZS-8	Granodiorite	100.144	29.3758	222	2	71.86	0.44	13.63	3.44	0.06	1.03	2.92	2.74	3.21	0.11	0.37	99.81	35.11	n.g.	10.29	38.88	21.87	6.706	3.818	n.g.	n.g.	n.g.	121.505	140.4	23.69	163.2	11.27	3.48	675.9	41.71	75.76	8.323	27.52	5.1604	1.0108	4.959	0.75221	4.289	0.869	2.506	0.391	2.533
Wu et al., 2017	Dongcuo batholith	HZS-11	Granodiorite	100.182	29.4279			71.98	0.41	13.53	3.22	0.06	1.15	2.6	2.73	3.65	0.11	0.38	99.82	27.38	n.g.	9.678	39.99	21.2	6.75	4.976	n.g.	n.g.	n.g.	135.47	122.6	31.28	153.2	11.9	4.173	616.5	47.91	88.34	9.731	32.14	6.30705	1.01175	6.037	0.95551	5.529	1.03	3.07	0.513	3.221
Wu et al., 2017	Dongcuo batholith	HZS-12	Granodiorite	100.182	29.4279			70.82	0.43	14.27	3.23277	0.06	1.08	2.94	2.92	3.48	0.12	0.47	99.8228	26.62	n.g.	9.786	55.78	15.81	6.833	3.557	n.g.	n.g.	n.g.	132.905	144.3	27.23	148.8	10.64	4.976	606.5	44.14	80.49	8.909	29.13	5.4682	1.0355	5.066	0.80785	4.606	0.933	2.813	0.451	2.865
Wu et al., 2017	Dongcuo batholith	HZS-14	Granodiorite	100.318	29.5775			71.5	0.41	14.08	3.44	0.07	0.78	2.51	3.04	3.27	0.11	0.63	99.84	59.33	n.g.	10.13	34.04	19.91	5.062	2.876	n.g.	n.g.	n.g.	159.695	111.7	45.37	218.1	17.13	4.65	373.5	88.59	166.5	18.62	62.19	11.3715	0.90345	9.884	1.47874	8.224	1.582	4.532	0.682	4.294
Wu et al., 2017	Dongcuo batholith	HZS-15	Granodiorite	100.318	29.5775			76.47	0.15	12.46	1.49	0.04	0.34	1.32	2.7	4.44	0.06	0.4	99.87	56.18	n.g.	4.156	10.38	13.64	1.722	1.387	n.g.	n.g.	n.g.	182.115	70.3	27.09	89.9	9.288	5.439	247.2	35.94	67.87	7.952	26.84	5.60215	0.5111	4.926	0.8025	4.538	0.912	2.783	0.428	2.843
Liu et al., 2006	Dongcuo batholith	cx3025-2	Granite	n.g.	n.g.			71.94	0.17	14.52	1.67806	0.04	0.28	1.85	3.47	5.48	0.03	0.69	100.148	n.g.	n.g.	n.g.	n.g.	n.g.	n.g.	n.g.	n.g.	n.g.	12.075	179.451	103.465	34.101	119.137	9.278	n.g.	275.88	26.36	54.34	5.88	22.36	4.96	0.85	5.18	0.88	6.07	1.35	4.03	0.61	4.01
Liu et al., 2006	Dongcuo batholith	cx3025-3	Granite	n.g.	n.g.			73.77	0.12	14.68	1.08907	0.03	0.24	1.34	3.12	5.04	0.03	0.45	99.9091	n.g.	n.g.	n.g.	n.g.	n.g.	n.g.	n.g.	n.g.	n.g.	10.588	145.905	77.619	34.531	111.841	6.923	n.g.	202.56	17.51	40.7	4.47	18.61	5.24	0.7	4.78	1	6.84	1.47	4.16	0.7	5.09
Liu et al., 2006	Dongcuo batholith	cx3025-4	Granite	n.g.	n.g.			67.85	0.37	15.61	3.46726	0.08	0.63	2.37	3.95	5.01	0.08	0.89	100.307	n.g.	n.g.	n.g.	n.g.	n.g.	n.g.	n.g.	n.g.	n.g.	17.275	188.755	102.545	55.239	205.293	17.408	n.g.	254.51	42.23	88.82	8.86	37.26	9.15	0.8	8.19	1.62	9.8	2.12	6.07	1	7.06
Liu et al., 2006	Dongcuo batholith	cx3026-2	Granite	n.g.	n.g.			72.26	0.32	13.64	2.64489	0.05	0.59	2.04	3.09	4.6	0.08	0.77	100.085	n.g.	n.g.	n.g.	n.g.	n.g.	n.g.	n.g.	n.g.	n.g.	17.274	131.91	128.648	31.668	198.34	12.47	n.g.	388.98	28.94	60.27	6.56	27.89	6.72	1.14	5.66	0.99	5.85	1.35	3.81	0.53	3.44
Liu et al., 2006	Dongcuo batholith	cx3027-1	Granite	n.g.	n.g.			65.3	0.4	19.15	3.17832	0.07	1.17	2.29	2.85	4.78	0.09	0.42	99.6983	n.g.	n.g.	n.g.	n.g.	n.g.	n.g.	n.g.	n.g.	n.g.	27.071	161.777	141.61	27.036	238.102	12.304	n.g.	669.05	25.33	56.76	5.98	23.29	5.6	1.34	4.85	0.69	4.38	1.06	2.99	0.48	3.18
Liu et al., 2006	Dongcuo batholith	cx3027-2	Granite	n.g.	n.g.			71.49	0.29	14.19	2.41152	0.05	0.7	2.15	3.35	5.13	0.06	0.47	100.292	n.g.	n.g.	n.g.	n.g.	n.g.	n.g.	n.g.	n.g.	n.g.	16.658	110.537	105.806	27.583	163.575	9.442	n.g.	459.72	27.09	54.01	5.94	23.38	4.65	0.94	4.05	0.61	3.68	0.86	2.62	0.41	2.89
Liu et al., 2006	Dongcuo batholith	cx3035-1	Granite	n.g.	n.g.			74.66	0.16	13.16	1.76697	0.04	0.25	1.41	3.71	5.1	0.04	0.32	100.617	n.g.	n.g.	n.g.	n.g.	n.g.	n.g.	n.g.	n.g.	n.g.	17.735	133.394	96.21	31.541	159.383	12.717	n.g.	432.44	27.04	56.79	5.98	23.61	5.44	0.82	4.94	0.89	5.49	1.14	3.52	0.58	3.9
Liu et al., 2006	Dongcuo batholith	cx3035-2	Granite	n.g.	n.g.	224	3	73.07	0.16	14.72	1.66695	0.03	0.26	1.37	3.54	4.99	0.03	0.29	100.127	n.g.	n.g.	n.g.	n.g.	n.g.	n.g.	n.g.	n.g.	n.g.	16.056	142.125	76.134	32.564	151.886	9.798	n.g.	401.05	28.08	55.76	6.05	22.89	5.14	0.78	4.78	0.83	5.26	1.12	3.51	0.59	3.72
Liu et al., 2006	Dongcuo batholith	cx3035-3	Granite	n.g.	n.g.			71.43	0.26	14.53	2.21149	0.05	0.6	2.07	3.42	5.24	0.05	0.45	100.311	n.g.	n.g.	n.g.	n.g.	n.g.	n.g.	n.g.	n.g.	n.g.	18.998	134.59	123.428	28.424	175.076	11.515	n.g.	493	23.78	46.35	4.78	19.59	4.46	1.03	3.93	0.68	4.23	0.99	3.13	0.47	3.62
Liu et al., 2006	Dongcuo batholith	cx3026-3	Granite	n.g.	n.g.			70.29	0.33	14.22	2.72269	0.66	0.66	2.02	4	5.26	0.08	0.63	100.873	n.g.	n.g.	n.g.	n.g.	n.g.	n.g.	n.g.	n.g.	n.g.	17.511	138.028	112.561	29.442	157.627	12.029	n.g.	436.32	30.28	59.55	6.65	26.14	5.89	1.14	5.49	0.94	5.29	1.08	3.25	0.5	3.47
Liu et al., 2006	Dongcuo batholith	cx3026-4	Granite	n.g.	n.g.			72.45	0.28	14	2.34484	0.05	0.49	1.99	3.26	4.69	0.06	0.38	99.9948	n.g.	n.g.	n.g.	n.g.	n.g.	n.g.	n.g.	n.g.	n.g.	14.708	110.469	107.897	32.314	176.44	1.98	n.g.	395.04	20.67	38.84	4.34	18.34	4.78	1	4.24	0.73	4.69	1.02	2.99	0.47	3.21
Liu et al., 2006	Dongcuo batholith	cx3025-1	Granite	n.g.	n.g.			78.08	0.08	11.6	0.811249	0.02	0.11	0.9	2.82	5.23	0.02	0.52	100.191	n.g.	n.g.	n.g.	n.g.	n.g.	n.g.	n.g.	n.g.	n.g.	8.781	149.638	43.626	36.207	100.156	7.318	n.g.	97.06	16.34	35.77	4.43	18.54	4.76	0.34	4.48	1.04	6.58	1.45	4.33	0.72	5.13
He et al., 2013	Maxiongou pluton	XC0901	Granodiorite porphyry	99.9626	29.1418			71.96	0.23	14.57	1.9	0.06	0.63	1.5	3.66	4.42	0.07	0.6	99.6	n.g.	n.g.	6.09	13.9	13	2.18	4.53	n.g.	17.7	11.2	167	88.4	17.8	107	11.5	6.47	406	25.9	45.7	4.43	14.6	2.74	0.308	2.58	0.461	2.58	0.6	1.78	0.27	1.87
He et al., 2013	Maxiongou pluton	XC0902	Granodiorite porphyry	99.9626	29.1418			71.58	0.26	14.53	2.09	0.06	0.76	1.7	3.51	4.63	0.09	0.59	99.8	n.g.	n.g.	5.79	15.3	12.4	2.28	4.13	n.g.	16.5	10	146	115	14.7	94.8	9.06	5.77	540	23	38.6	4.01	13.4	2.5	0.375	2.38	0.401	2.28	0.471	1.48	0.213	1.5
He et al., 2013	Maxiongou pluton	XC0903	Granodiorite porphyry	99.9626	29.1418	216	2.2	72.67	0.23	14.17	1.87	0.05	0.67	1.57	3.53	4.28	0.07	0.56	99.67	n.g.	n.g.	5.26	14.5	14.9	2.24	3.93	n.g.	18.2	11.3	186	90.2	17.2	102	11.4	6.59	374	27.6	48.8	4.84	16.4	3.06	0.328	2.75	0.451	2.69	0.598	1.66	0.257	1.82
He et al., 2013	Maxiongou pluton	XC0904	Granodiorite porphyry	99.9626	29.1418			72	0.23	14.72	1.85	0.06	0.66	1.85	3.67	4.24	0.08	0.54	99.9	n.g.	n.g.	5.41	14.9	11	2.21	4.04	n.g.	16.8	11.1	152	103	18.9	103	9.96	5.3	401	20.3	34.8	3.68	12.8	2.79	0.339	2.46	0.464	2.83	0.628	1.83	0.291	2.19
He et al., 2013	Maxiongou pluton	XC0905	Granodiorite porphyry	99.9626	29.1418			72.93	0.29	14.01	1.9	0.05	0.63	1.3	3.36	4.71	0.07	0.48	99.73	n.g.	n.g.	4.76	13.5	9.05	2.01	3.06	n.g.	15.4	10.8	192	81.3	20.9	105	11.8	6.55	424	27.4	44	5.06	17.9	3.44	0.287	3.02	0.557	3.32	0.727	2.1	0.329	2.27
Wu et al., 2017	Maxiongou pluton	MXG-1	Granodiorite porphyry	99.9558	29.1409	225	2	73.59	0.26	13.58	2.15	0.05	0.75	1.28	3.12	4.45	0.1	0.49	99.82	44.37	n.g.	4.603	22.5862	22.35	3.442	5.244	n.g.	n.g.	n.g.	237.88	122.1	29.55	131.1	17.14	8.963	571.8	39.31	66.21	6.95	21.62	4.45455	0.58045	4.287	0.7383	4.513	0.959	3.055	0.524	3.568
Wu et al., 2017	Maxiongou pluton	MXG-3	Granodiorite porphyry	99.9558	29.1409			73.76	0.23	13.65	1.92	0.05	0.64	1.46	3.33	4.28	0.1	0.41	99.83	58.23	n.g.	4.666	19.4012	15.46	2.999	4.11	n.g.	n.g.	n.g.	215.935	110.9	28.15	133.4	16.59	6.977	514.4	36.57	72.85	6.791	20.88	4.22465	0.56525	4.011	0.73937	4.504	0.961	3.016	0.537	3.63
Wu et al., 2017	Maxiongou pluton	MXG-5	Granodiorite porphyry	99.9558	29.1409			73.86	0.2	13.8	1.72	0.04	0.61	1.5	3.08	4.46	0.09	0.46	99.82	43.24	n.g.	3.349	18.2091	15.37	2.668	3.486	n.g.	n.g.	n.g.	203.015	120.6	17.25	112.6	12.49	6.219	635.4	38.33	62.47	6.125	18.59	3.4523	0.5909	3.312	0.51681	2.931	0.575	1.765	0.29	2.047
Peng et al., 2014; Fang, 2017	Shengmu batholith	SJ-233	Granitoid	100.547	29.0435			56.93	0.56	20.47	4.65	0.09	2.62	7.49	3.24	1.96	0.19	1.26	99.46	n.g.	n.g.	17	120	17	11.5	8.08	n.g.	n.g.	n.g.	70.6	607	16.3	123	7.59	n.g.	710	13.7	29.7	3.85	16.5	3.75	1.51	3.29	0.56	3.04	0.66	1.74	0.25	1.66
	Shengmu batholith	SJ-235	Granitoid	100.547	29.0435	218.3	3.1	74.86	0.13	12.9	1.51	0.01	0.34	0.99	2.03	6.1	0.02	0.52	99.41	n.g.	n.g.	5.31	9.01	5.33	1.5	2.81	n.g.	n.g.	n.g.	125	178	26.1	62.7	7.68	n.g.	841	46.6	94.1	9.87	35	6.85	0.68	5.44	0.89	4.64	0.99	2.73	0.41	2.96
	Shengmu batholith	SJ-241	Granitoid	100.55	29.0545	216.1	2.5	64.49	0.57	15.65	4.83	0.09	2.37	4.81	2.69	3.07	0.17	0.66	99.4	n.g.	n.g.	12.9	103	17.5	10.6	7.37	n.g.	n.g.	n.g.	114	377	17.3	117	11.1	n.g.	817	24	45.9	5.2	20.1	4.16	1.08	3.52	0.6	3.3	0.71	1.98	0.28	1.99
	Shengmu batholith	SJ-242	Granitoid	100.55	29.0545			63.95	0.56	16.1	4.6	0.09	2.37	4.74	3.06	3.15	0.16	0.66	99.44	n.g.	n.g.	12.7	101	17.5	10.7	7.94	n.g.	n.g.	n.g.	119	396	17.4	129	11.1	n.g.	849	41	72.1	7.36	25.9	4.52	1.13	3.88	0.6	3.17	0.7	1.95	0.28	1.9
	Shengmu batholith	SJ-243	Granitoid	100.55	29.0545			64.84	0.55	15.56	4.69	0.09	2.29	4.65	2.62	3.38	0.16	0.58	99.41	n.g.	n.g.	13.6	102	20.5	10.4	8.77	n.g.	n.g.	n.g.	118	379	17	126	10.6	n.g.	877	31.7	57.4	6.09	22.5	4.23	1.07	3.68	0.61	3.24	0.69	1.85	0.28	1.82
	Shengmu batholith	SJ-244	Granitoid	100.55	29.0545			64.89	0.54	15.73	4.44	0.08	2.3	4.43	2.61	3.66	0.16	0.58	99.42	n.g.	n.g.	12.9	97.1	18.4	10.1	9.76	n.g.	n.g.	n.g.	122	388	16	144	10.3	n.g.	1010	14.4	29.5	3.68	15.5	3.5	1.11	3.22	0.52	2.98	0.65	1.78	0.26	1.82
	Shengmu batholith	SJ-245	Granitoid	100.55	29.0545			65.16	0.53	15.61	4.46	0.09	2.32	4.31	2.59	3.58	0.15	0.64	99.44	n.g.	n.g.	13.2	99.1	17.4	10.2	7.61	n.g.	n.g.	n.g.	124	387	16.5	121	10.6	n.g.	1040	15	30.8	4.02	16.6	3.82	1.08	3.38	0.57	3.13	0.69	1.82	0.27	1.79
	Shengmu batholith	SJ-249	Granitoid	100.55	29.0545			58.78	0.62	20.67	5.09	0.08	0.86	6.37	3.5	2.44	0.19	0.82	99.42	n.g.	n.g.	9.86	30.3	4.1	6.11	5.57	n.g.	n.g.	n.g.	85.6	659	18.2	282	16	n.g.	884	36.9	67.3	7.43	27.7	5.14	2.58	4.41	0.69	3.64	0.79	2.17	0.29	2.02
	Shengmu batholith	SJ-250	Granitoid	100.55	29.0545			59.63	0.56	20.98	4.16	0.06	0.74	6.52	3.62	2.29	0.17	0.68	99.41	n.g.	n.g.	7.56	25.3	4.02	5.07	5.75	n.g.	n.g.	n.g.	78.4	668	12	248	14.4	n.g.	808	35.9	64.3	6.88	25.8	4.28	2.66	3.41	0.5	2.3	0.49	1.37	0.18	1.27
	Shengmu batholith	SJ-254	Granitoid	100.55	29.0545			62.53	0.66	16.12	5.44	0.1	2.95	5.4	2.64	2.76	0.17	0.65	99.42	n.g.	n.g.	15.3	120	23.4	13.3	9.65	n.g.	n.g.	n.g.	104	384	17.8	87.3	11.4	n.g.	783	18.4	38.3	4.84	19.8	4.2	1.11	3.56	0.62	3.41	0.74	2.07	0.28	1.9
	Shengmu batholith	SJ-255	Granitoid	100.55	29.0545			62.07	0.66	16.4	5.45	0.1	3.01	5.5	2.75	2.57	0.16	0.75	99.42	n.g.	n.g.	15.5	118	24.9	12.9	11.1	n.g.	n.g.	n.g.	94.6	369	19.9	119	11.1	n.g.	778	30.7	58.5	6.52	24.9	4.78	1.17	3.98	0.69	3.82	0.81	2.29	0.33	2.17
	Shengmu batholith	SJ-246	Enclave	100.55	29.0545	216.5	4	57.04	0.85	17.29	7.27	0.14	3.74	6.1	3.19	2.77	0.33	0.7	99.42	n.g.	n.g.	17.1	163	20.5	16	9.92	n.g.	n.g.	n.g.	140	409	22.6	134	14.1	n.g.	654	43.9	85.6	9.57	35.5	6.33	1.37	5.47	0.87	4.48	0.96	2.66	0.37	2.57
	Shengmu batholith	SJ-247	Enclave	100.55	29.0545			57.67	0.83	17.03	7.07	0.14	3.74	5.88	2.9	3.11	0.31	0.75	99.43	n.g.	n.g.	18.2	161	21.9	15.8	10.2	n.g.	n.g.	n.g.	141	420	21.8	129	13.8	n.g.	933	30.2	64.4	7.71	30.1	5.84	1.29	5.08	0.8	4.18	0.91	2.49	0.36	2.38
Wu et al., 2017	Shengmu batholith	DC-1	Granodiorite	100.522	29.0395			71.24	0.32	14.55	2.91	0.06	0.92	2.56	3.04	3.59	0.11	0.49	99.79	51.2	n.g.	7.658	36.1634	12.29	5.154	2.286	n.g.	n.g.	n.g.	158.175	209.1	24.97	132.3	12.1	8.421	622.6	44.8	84.67	8.736	27.91	5.3637	0.84075	4.807	0.75863	4.2	0.864	2.602	0.427	2.709
Wu et al., 2017	Shengmu batholith	DC-9	Granodiorite	100.522	29.0395	220	2	72.31	0.3	13.92	2.6	0.06	0.83	2.42	2.95	3.83	0.11	0.47	99.8	49.86	n.g.	6.673	31.5133	19.49	4.375	2.156	n.g.	n.g.	n.g.	171.855	194.7	27.41	124.9	12.58	7.43	710.6	46.7	82.22	8.749	28.22	5.42355	0.8531	4.993	0.76398	4.501	0.916	2.76	0.452	3
Wu et al., 2017	Shengmu batholith	DC-10	Granodiorite	100.522	29.0395			73.86	0.26	13.43	2.44	0.05	0.63	2.16	3.05	3.42	0.09	0.4	99.79	39.09	n.g.	7.082	22.841	15.09	3.525	1.603	n.g.	n.g.	n.g.	140.6	197.1	25.7	129.4	12.28	6.581	832	39.28	67.84	7.224	23.48	4.39945	0.7733	4.287	0.68373	4.107	0.859	2.627	0.438	2.87
Wu et al., 2017	Shengmu batholith	DC-11	Granodiorite	100.522	29.0395			73.17	0.25	13.85	2.36	0.05	0.6	2.16	3.09	3.77	0.1	0.36	99.76	38.29	n.g.	6.085	22.6	17.46	3.084	1.895	n.g.	n.g.	n.g.	146.395	194.3	29.3	138.7	11.36	6.775	1029	43.65	76.42	8.344	27.11	5.2307	0.89775	4.833	0.77896	4.86	0.991	3.037	0.521	3.392
Wang et al., 2013	Xiangcheng	XC05	Andesite/dacite	99.8272	28.9037			60.77	0.6	15.18	6.36	0.1	5.06	1.27	2.53	3.84	0.19	3.93	99.83	n.g.	n.g.	30.1	181	107	26.6	15.6	n.g.	n.g.	n.g.	45.8	957	18.6	174	9.35	n.g.	2949	34.7	66.7	7.89	29.4	5.61	1.45	5.23	0.68	3.37	0.79	1.97	0.29	1.87
Wang et al., 2013	Xiangcheng	XC06	Andesite/dacite	99.8272	28.9037			58.22	0.58	14.19	7.13	0.11	3.85	8.98	2.45	0.59	0.17	3.54	99.81	n.g.	n.g.	23.6	194	47.8	19	11.3	n.g.	n.g.	n.g.	17	1207	14.1	134	8.04	n.g.	228	30.7	57.6	6.65	25	5	1.3	4.39	0.58	2.83	0.59	1.49	0.21	1.37
Wang et al., 2013	Xiangcheng	XC08	Andesite/dacite	99.8272	28.9037			57.52	0.52	16.45	5.32	0.09	3.05	6.99	4.31	1.1	0.19	4.29	99.83	n.g.	n.g.	19.4	136	46.9	11	10	n.g.	n.g.	n.g.	29.8	1380	14.7	182	11.1	n.g.	786	28.5	54.3	6.08	21.9	4.06	1.08	3.86	0.49	2.6	0.59	1.6	0.22	1.53
Wang et al., 2013	Xiangcheng	XC09	Andesite/dacite	99.8272	28.9037	227.9	1.5	60.41	0.53	15.67	5.73	0.09	3.8	3.47	2.93	3.43	0.19	3.6	99.85	n.g.	n.g.	19.1	122	61.3	13.3	12.3	n.g.	n.g.	n.g.	73.7	1140	15.2	173	8.96	n.g.	2295	30.8	58.2	6.6	23.4	4.38	0.96	3.98	0.54	2.76	0.59	1.63	0.24	1.61
Wang et al., 2013	Xiangcheng	XC10	Andesite/dacite	99.8272	28.9037			62.47	0.48	14.58	4.89	0.11	2.59	5.79	4.46	0.89	0.17	3.42	99.85	n.g.	n.g.	18	121	41	13.9	10.4	n.g.	n.g.	n.g.	17.5	630	14.6	153	9.43	n.g.	747	36.2	59.4	6.47	22.9	4.13	1.17	3.69	0.51	2.4	0.57	1.45	0.22	1.38
Liu et al., 2006	Xiangcheng stocks	cx3032-1	Porphyry	99.7868	28.9436			61.74	0.48	15.07	5.212	0.11	2.64	4.98	5.22	1.51	0.18	2.97	100.112	n.g.	n.g.	n.g.	n.g.	n.g.	n.g.	n.g.	n.g.	n.g.	17.55	12.245	398.893	10.324	98.491	4.644	n.g.	628.92	20.15	35.89	4.15	15.32	3.47	1.19	2.59	0.35	1.57	0.32	1.02	0.16	1.02
Liu et al., 2006	Xiangcheng stocks	cx3032-2	Porphyry	99.7868	28.9436			57.65	0.54	15.95	6.74559	0.09	4.44	4.79	1.82	4.35	0.19	3.53	100.096	n.g.	n.g.	n.g.	n.g.	n.g.	n.g.	n.g.	n.g.	n.g.	70.167	60.708	921.461	13.351	145.593	7.725	n.g.	3125.41	27.37	56.07	5.94	23.66	6.98	3.99	4.01	0.56	2.51	0.49	1.45	0.24	1.55
Liu et al., 2006	Xiangcheng stocks	cx3032-3	Porphyry	99.7868	28.9436			55.97	0.51	14.94	6.03436	0.1	2.33	3.87	5.29	1.78	0.19	8.94	99.9544	n.g.	n.g.	n.g.	n.g.	n.g.	n.g.	n.g.	n.g.	n.g.	18.763	29.961	850.098	16.313	142.046	7.039	n.g.	487.38	26.78	52.75	5.85	21.25	4.61	1.37	3.98	0.55	2.77	0.51	1.52	0.23	1.62
Liu et al., 2006	Xiangcheng stocks	cx3033-1	Porphyry	99.7868	28.9436	222	3	61.72	0.49	14.85	5.33424	0.08	3.25	5.29	3.36	3.64	0.2	1.91	100.124	n.g.	n.g.	n.g.	n.g.	n.g.	n.g.	n.g.	n.g.	n.g.	34.021	57.528	1018.45	14.281	144.396	7.292	n.g.	1567.92	24.66	51.19	5.72	22.8	6.16	2.42	3.87	0.51	2.48	0.48	1.42	0.22	1.44
Liu et al., 2006	Xiangcheng stocks	cx3028-1	Granite	99.9601	29.1412			73.24	0.2	13.99	1.67806	0.04	0.52	1.29	3.35	4.51	0.06	0.66	99.5381	n.g.	n.g.	n.g.	n.g.	n.g.	n.g.	n.g.	n.g.	n.g.	14.831	172.323	101.71	19.124	142.298	10.495	n.g.	424.04	25.01	42.41	4.45	16.45	3.64	0.7	3.5	0.51	2.73	0.62	2.04	0.35	2.3
Liu et al., 2006	Xiangcheng stocks	cx3029-1	Granite	99.9601	29.1412			71.69	0.27	14.46	2.14481	0.05	0.68	1.98	3.79	4.37	0.09	0.79	100.315	n.g.	n.g.	n.g.	n.g.	n.g.	n.g.	n.g.	n.g.	n.g.	19.373	128.063	138.221	16.482	129.022	12.072	n.g.	415.18	36.13	65.41	6.32	23.3	4.05	0.84	3.66	0.49	2.74	0.62	1.89	0.31	2.15
Liu et al., 2006	Xiangcheng stocks	cx3029-2	Granite	99.9601	29.1412			73.24	0.06	16.03	0.22226	0.01	0.17	0.46	3.06	6.39	0.02	0.39	100.052	n.g.	n.g.	n.g.	n.g.	n.g.	n.g.	n.g.	n.g.	n.g.	10.933	161.748	42.097	23.687	86.64	8.185	n.g.	107.79	21.32	48.79	4.66	16.76	3.32	0.24	3.36	0.64	4.01	0.93	2.99	0.51	3.78
Southern Yidun terrane
Yan et al., 2018	Xiuwacu pluton	XWC13‐B5	Granite	99.97	28.4961			68.6	0.37	14.2	2.89	0.07	1.46	2.56	3.45	4.13	0.2	1.05	98.98	n.g.	n.g.	6.6	58	11	8.8	12.8	n.g.	n.g.	n.g.	165.5	581	15.4	14.4	23.7	10.15	890	24.4	45.6	7.1	23.7	4.4	1.1	3.8	0.5	2.7	0.6	1.8	0.3	1.9
Yan et al., 2018	Xiuwacu pluton	XWC13‐B6	Granite	99.97	28.4961			73.3	0.17	13.25	1.13	0.03	0.53	1.68	3.29	4.61	0.06	1.08	99.13	n.g.	n.g.	3.8	23	3	2.7	2.6	n.g.	n.g.	n.g.	204	564	15.3	9.2	19.8	14.65	670	19.5	42.6	5.5	19.8	4.1	1.2	3.5	0.5	2.7	0.5	1.5	0.3	1.5
Yan et al., 2018	Xiuwacu pluton	XWC13‐B20	Granite	99.97	28.4961	217	1.2	68.4	0.37	13.65	3.66	0.08	1.14	1.99	2.56	4.92	0.16	1.45	98.38	n.g.	n.g.	7.3	56	8	5	6.3	n.g.	n.g.	n.g.	421	329	19.7	11.6	30.6	16.95	560	44.4	83.9	9.5	30.6	5	1	4.2	0.5	3	0.6	2	0.3	2
Yan et al., 2018	Xiuwacu pluton	XWC13‐B23	Granite	99.97	28.4961			75.8	0.09	12.59	0.62	0.01	0.13	0.79	3.35	5.28	0.01	0.25	98.92	n.g.	n.g.	2	9	1	1	0.9	n.g.	n.g.	n.g.	202	128.5	19.4	20.3	12.1	4.67	150	13.9	30.7	3.6	12.1	2.6	0.4	2.5	0.4	2.3	0.6	1.9	0.3	2.6
Yan et al., 2018	Xiuwacu pluton	XWC13‐B24	Granite	99.97	28.4961			69.9	0.31	14.05	2.38	0.05	1.14	2.17	3.49	3.92	0.16	1.34	98.91	n.g.	n.g.	6	46	6	5.5	6	n.g.	n.g.	n.g.	222	489	14.9	10.1	20.6	10.4	790	30.9	52.6	6.3	20.6	3.5	0.9	3	0.4	2.2	0.5	1.4	0.3	1.7
Gao et al., 2018	Xiuwacu pluton	XWCBT-1-T2	Granite	99.9566	28.4989	199.8	2.5	68.95	0.35	14.88	2.61	0.06	1.28	2.7	3.63	4.14	0.15	1.22	99.97	n.g.	n.g.	6.71	55.4	11.5	5.69	6.91	n.g.	n.g.	n.g.	180	596	16	155	21.4	11.8	889	42.2	74.3	8.36	29.3	4.77	1.02	3.55	0.57	2.79	0.52	1.61	0.27	1.86
Gao et al., 2018	Xiuwacu pluton	XWC12-B1	Granite	99.9566	28.4989			71.95	0.33	13.34	2.53	0.06	1.16	2.01	3.21	4.29	0.14	0.51	99.53	n.g.	n.g.	4.4	42.3	8.7	4.53	5.2	n.g.	n.g.	n.g.	176	424	15	137	18.8	8.44	766	57.2	97.6	10.21	31.92	4.52	0.8	3.36	0.43	2.43	0.49	1.43	0.23	1.64
Gao et al., 2018	Xiuwacu pluton	XWC12-B2	Granite	99.9566	28.4989			69.11	0.38	14.54	2.93	0.07	1.38	1.97	3.45	4.55	0.17	0.97	99.52	n.g.	n.g.	5.64	54.7	9	5.79	6.5	n.g.	n.g.	n.g.	179	549	18	149	21.5	6.96	1334	40.1	74.5	8.45	28.6	4.86	0.97	3.68	0.51	2.82	0.59	1.69	0.26	1.82
Gao et al., 2018	Xiuwacu pluton	XWC13-B7-2	Granite	99.9566	28.4989			66.7	0.49	14.05	3.81	0.1	2.1	2.79	3.42	4.07	0.26	0.92	98.71	n.g.	n.g.	10.1	81	16	10.2	16.1	n.g.	n.g.	n.g.	237	641	18	17	31.4	17.45	1510	42.6	73.1	9.8	31.4	5.1	1.4	4.3	0.6	2.9	0.6	1.9	0.3	1.9
Gao et al., 2018	Xiuwacu pluton	XWC13-B9	Granite	99.9566	28.4989			68.7	0.75	12.3	4.6	0.09	1.46	1.02	2.63	5.99	0.25	1.07	98.86	n.g.	n.g.	3.7	38	9	9.9	15.1	n.g.	n.g.	n.g.	335	160	26	70	34.3	18.15	580	55.7	103.5	11.1	34.3	5.7	0.9	4.9	0.7	3.7	0.8	2.4	0.4	3
Gao et al., 2018	Xiuwacu pluton	XWC13-B18	Granite	99.9566	28.4989			67	0.4	15.05	3.32	0.07	1.68	2.57	3.44	4.01	0.19	1.19	98.92	n.g.	n.g.	8.1	67	13	7.7	12.5	n.g.	n.g.	n.g.	138	701	17	26	31.6	12.35	1000	41	70.4	9.8	31.6	5.3	1.3	4.4	0.6	3.2	0.6	2	0.3	2
Gao et al., 2018	Xiuwacu pluton	XWC13-B19A	Granite	99.9566	28.4989			67.1	0.32	14.7	2.54	0.05	1.08	2.31	3.3	4.67	0.15	2.37	98.59	n.g.	n.g.	6.2	49	6	5.2	5.8	n.g.	n.g.	n.g.	315	446	14	15	20.9	21.6	1170	27	48.1	6.2	20.9	3.8	0.9	3.2	0.4	2.3	0.5	1.5	0.2	1.8
Gao et al., 2018	Xiuwacu pluton	XWC13-B19B	Granite	99.9566	28.4989			68.8	0.32	14.7	2.61	0.06	1.2	2.79	3.74	3.63	0.14	1.03	99.02	n.g.	n.g.	6.6	53	7	6.2	6.7	n.g.	n.g.	n.g.	142	583	16	18	20.1	5.85	650	24.9	45.1	5.9	20.1	3.8	1.1	3.4	0.4	2.5	0.6	1.7	0.3	2
Gao et al., 2018	Xiuwacu pluton	XWC13-B19C	Granite	99.9566	28.4989			68.9	0.33	14.75	2.56	0.06	1.19	2.56	3.78	3.75	0.15	1.05	99.08	n.g.	n.g.	6.7	52	7	5.8	6.4	n.g.	n.g.	n.g.	175	560	16	16	26.6	15.05	730	37	64.2	8.4	26.6	4.3	1.2	3.6	0.5	2.6	0.6	1.7	0.3	1.9
Gao et al., 2018	Xiuwacu pluton	XWC13-B19D	Granite	99.9566	28.4989			70.4	0.33	14.15	2.58	0.06	1.17	2.4	3.57	3.46	0.15	0.64	98.91	n.g.	n.g.	6.7	52	7	6.1	6.9	n.g.	n.g.	n.g.	161	503	19	20	25.4	8.08	720	31.2	56	7.8	25.4	4.6	1.1	3.9	0.5	2.9	0.6	1.9	0.3	2.2
Gao et al., 2018	Xiuwacu pluton	XWC13-B19E	Granite	99.9566	28.4989			68.9	0.33	14.65	2.59	0.05	1.13	1.68	3.5	4.49	0.16	1.55	99.03	n.g.	n.g.	6.6	54	6	6	6.8	n.g.	n.g.	n.g.	183	506	17	21	18.8	10.05	1190	18.9	40.4	5.2	18.8	3.8	1	3.4	0.5	2.7	0.6	1.7	0.3	1.9
Gao et al., 2018	Xiuwacu pluton	XWC13-B19F	Granite	99.9566	28.4989			70.7	0.31	14.05	2.49	0.06	1.13	2.22	3.69	3.15	0.15	0.92	98.87	n.g.	n.g.	6.3	47	6	5.2	6.2	n.g.	n.g.	n.g.	192	506	15	17	26	7.32	520	43.6	71.2	8.5	26	3.8	1	3.2	0.4	2.3	0.5	1.5	0.3	1.8
Chen et al., 2014	Lannitang pluton	LNTA	Quartz monzonite porphyry	99.7978	28.1158			58.59	1.36	14.94	7.32	0.09	2.68	4.52	4.02	2.34	0.22	3.45	99.53	n.g.	n.g.	19.2	201	17.1	17.1	16.8	91.8	n.g.	17.3	53.2	1115	18.7	199	17.9	5.37	2082	48.8	88.3	9.82	33.8	5.86	1.43	4.61	0.65	3.61	0.68	1.76	0.25	1.61
Chen et al., 2014	Lannitang pluton	LNTB	Quartz monzonite porphyry	99.7978	28.1158			51.61	1.52	18.57	9.46	0.1	4.08	5.04	5.84	0.19	0.31	2.75	99.47	n.g.	n.g.	15.9	236	14.9	20.8	14.8	46.1	n.g.	24.9	3.26	2410	25.3	279	28.3	1.5	1264	90.1	155	16.7	56.3	9.24	2.45	6.7	0.91	4.83	0.9	2.25	0.33	2.11
Chen et al., 2014	Lannitang pluton	LNTY	Quartz monzonite porphyry	99.7978	28.1158	216.7	1.2	64.6	0.64	16.69	5.79	0.01	1.92	0.34	4.08	3	0.18	2.2	99.45	n.g.	n.g.	8.3	136	60.2	4.4	6.737	538	n.g.	19.2	56.8	214	20.6	164	13	4.17	1216	42.2	71.9	7.65	26.7	4.7	1.26	4.38	0.61	3.49	0.7	1.85	0.27	1.67
Chen et al., 2014	Hongshan	HSB	Andesite	99.8908	28.1233	213.4	2.2	58.39	0.84	16.82	5.13	0.05	1.95	3.47	4.74	2.61	0.42	5.25	99.67	n.g.	n.g.	15.3	183	53.6	9.24	17.6	18.2	n.g.	19.5	52.8	1301	16.2	185	16.3	2.72	2250	63	111	12.6	43.7	7.08	1.34	4.62	0.6	3.25	0.59	1.51	0.23	1.42
Chen et al., 2014	Hongshan	HST01	Andesite	99.8908	28.1233			56.8	0.77	16.1	6.43	0.05	1.82	4.23	4.89	2.57	0.41	5.57	99.64	n.g.	n.g.	15.6	166	87.3	10.1	19.4	34.3	n.g.	18.6	57	1456	19.7	176	15	3.12	2227	67	122	13.4	45.9	7.48	1.58	5.04	0.68	3.65	0.67	1.77	0.26	1.67
Chen et al., 2014	Hongshan	HST03	Andesite	99.8908	28.1233			58.9	0.73	15.24	5.12	0.08	1.94	4.65	3.86	2.84	0.37	5.95	99.68	n.g.	n.g.	13.9	150	81.5	14.8	22.5	10.6	n.g.	17.9	60.5	1795	15.1	169	14.3	2.97	2422	59.6	107	11.8	39.6	6.27	1.3	4.4	0.54	2.82	0.52	1.32	0.2	1.28
Chen et al., 2014	Hongshan	HST04	Andesite	99.8908	28.1233			61.07	0.8	17.32	5.07	0.02	1.35	2.67	3.43	3.67	0.49	3.61	99.5	n.g.	n.g.	15.3	135	87.6	8.97	15.7	36.8	n.g.	18.8	82.8	1677	19.2	184	15.3	3.61	2797	64.7	115	12.5	42.3	6.84	1.35	5.16	0.69	3.6	0.66	1.68	0.24	1.48
Chen et al., 2014	Xuejiping pluton	XJPA	Quartz monzonite porphyry	99.8103	28.0108	215.9	1.4	67.73	0.74	15.4	3.96	0.02	1.85	0.24	3.85	3.58	0.16	1.98	99.51	n.g.	n.g.	10.4	116	79.3	10.3	12	292	n.g.	17.9	87.6	392	12.4	156	15.5	2.97	1434	49.1	84.3	9.08	30.8	5.19	1.18	3.73	0.48	2.53	0.45	1.23	0.19	1.29
Chen et al., 2014	Chundu pluton	CD-1	Quartz monzonite porphyry	99.8694	27.9581	215.3	2.7	64.12	0.8	14.59	4.26	0.06	1.6	2.26	3.96	3.69	0.24	3.97	99.55	n.g.	n.g.	8	113	94.6	10.3	12.3	78.8	n.g.	17.2	109	293	13.6	177	21.4	11.7	1932	47.7	80.3	8.61	30.6	4.63	1.29	3.63	0.44	2.26	0.43	1.17	0.18	1.21
Chen et al., 2014	Pulang pluton	PL-01	Quartz diorite porphyry	99.985	28.0372	211.8	1.9	56.95	0.53	14.29	5.22	0.07	7.24	5.59	3.45	1.88	0.12	4.34	99.68	n.g.	n.g.	20.5	110	293	44.5	150	29.3	n.g.	14.2	65.5	877	12.4	86	2.8	3.66	685	11.8	25.1	3.25	12.1	2.52	0.7	2.39	0.37	2.12	0.43	1.12	0.17	1.1
Chen et al., 2014	Pulang pluton	PL-03	Quartz diorite porphyry	99.985	28.0372	217.2	1.4	63.1	0.75	14.8	3.49	0.05	3.74	5.78	4.25	2.2	0.38	0.88	99.42	n.g.	n.g.	18.9	154	56.8	39.5	20.7	47.1	n.g.	15.6	59.4	1043	19.7	177	11.4	1.43	1346	33.2	68.2	8.29	31.5	6.51	1.57	5.5	0.72	3.75	0.7	1.79	0.26	1.7
Chen et al., 2014	Pulang pluton	PL-06	Quartz diorite porphyry	99.985	28.0372	215.3	1.4	65.85	0.61	12.53	3.34	0.02	2.43	0.82	5.56	6.89	0.28	1.11	99.44	n.g.	n.g.	13.4	109	39.9	9.27	14.2	4995	n.g.	18.1	249	396	9.54	183	12.2	9.56	1347	15.6	29.8	3.64	13.9	2.8	0.56	2.38	0.32	1.78	0.33	0.89	0.13	0.9
Wang et al., 2011	Pulang pluton	BQ-44	Quartz diorite porphyry	99.986	28.0434			65.632	0.472	15.804	3.385	0.048	2.138	3.763	3.592	3.258	0.208	1.096	99.396	n.g.	n.g.	n.g.	n.g.	31.5	n.g.	21.8	n.g.	n.g.	n.g.	86.5	1230	13.7665	211	12.1	n.g.	1230	36	65.3	7.18	26.1	4.38	1.07795	3.42242	0.493	2.33508	0.466	1.29	0.179	1.18
Wang et al., 2011	Pulang pluton	BQ-47	Quartz diorite porphyry	99.986	28.0434			66.006	0.46	15.351	2.667	0.016	1.849	3.377	3.867	3.804	0.273	1.161	98.831	n.g.	n.g.	n.g.	n.g.	34.6	n.g.	15.1	n.g.	n.g.	n.g.	87.7	855	14.978	202	11.4	n.g.	1170	22.2	45.9	5.64	21.7	4.21	1.16214	3.26097	0.521	2.6911	0.525	1.43	0.208	1.34
Wang et al., 2011	Pulang pluton	BQ-53	Quartz diorite porphyry	99.986	28.0434	224.2	1.7	66.9772	0.431886	15.7982	3.02962	0.06	1.92285	3.12132	2.80405	2.86457	0.22282	2.44361	99.6761	n.g.	n.g.	n.g.	n.g.	40.8	n.g.	23.2	n.g.	n.g.	n.g.	95.6	1130	12.6652	330	14.8	n.g.	1470	33.7	62.7	7.16	26	4.52	1.1532	3.21117	0.473	2.19895	0.422	1.21	0.16	1.05
Wang et al., 2011	Pulang pluton	BQ-65	Quartz diorite porphyry	99.986	28.0434			67.121	0.454	15.736	2.705	0.02	1.856	2.188	3.478	4.792	0.246	1.315	99.911	n.g.	n.g.	n.g.	n.g.	24.5	n.g.	13.4	n.g.	n.g.	n.g.	149	782	14.978	186	11.3	n.g.	1870	30.3	55.7	6.27	23.6	4.18	1.14713	3.35585	0.511	2.51309	0.496	1.44	0.194	1.35
Wang et al., 2011	Pulang pluton	BQ-67	Quartz diorite porphyry	99.986	28.0434			67.098	0.5	14.186	4.539	0.02	2.387	2.023	2.718	4.919	0.338	1.143	99.871	n.g.	n.g.	n.g.	n.g.	39.6	n.g.	15.6	n.g.	n.g.	n.g.	170	641	13.4361	170	12.2	n.g.	1020	18.2	36.7	4.59	18.4	3.72	0.92881	3.17956	0.474	2.39791	0.448	1.25	0.179	1.19
Wang et al., 2011	Pulang pluton	BQ-208	Quartz diorite porphyry	99.986	28.0434			66.636	0.423	15.873	3.044	0.04	2.221	3.787	3.184	2.417	0.208	1.226	99.059	n.g.	n.g.	n.g.	n.g.	37.4	n.g.	24.8	n.g.	n.g.	n.g.	81.7	1180	14.978	179	9.91	n.g.	1100	29.4	53.1	6.13	22.5	3.91	1.13286	3.17749	0.487	2.49215	0.499	1.38	0.197	1.26
Wang et al., 2011	Pulang pluton	BQ-27	Quartz diorite porphyry	99.986	28.0434			62.733	0.671	14.87	5.002	0.046	3.928	3.912	2.888	4.172	0.397	1.045	99.664	n.g.	n.g.	n.g.	n.g.	65.4	n.g.	21.7	n.g.	n.g.	n.g.	169	814	18.6123	185	11.9	n.g.	2120	28.1	55.5	6.7	26.1	5.27	1.42074	4.66924	0.668	3.17277	0.649	1.7	0.226	1.49
Wang et al., 2011	Pulang pluton	BQ-30	Quartz diorite porphyry	99.986	28.0434			62.187	0.654	14.467	6.052	0.072	4.181	5.409	2.17	3.257	0.424	0.983	99.856	n.g.	n.g.	n.g.	n.g.	60	n.g.	24.8	n.g.	n.g.	n.g.	132	835	20.0441	187	11.6	n.g.	2210	37.3	68.7	8.09	30.5	5.93	1.59949	5.53381	0.753	3.61257	0.704	1.95	0.25	1.58
Wang et al., 2011	Pulang pluton	BQ-33	Quartz diorite porphyry	99.986	28.0434			62.714	0.66	14.888	4.213	0.067	4.024	5.045	3.227	3.693	0.398	1.057	99.986	n.g.	n.g.	n.g.	n.g.	60.2	n.g.	22.9	n.g.	n.g.	n.g.	119	905	19.163	184	12	n.g.	2100	37.8	69.3	7.98	30.1	5.69	1.60581	5.1617	0.725	3.44503	0.659	1.84	0.242	1.54
Wang et al., 2011	Pulang pluton	BQ-34	Quartz diorite porphyry	99.986	28.0434	217.9	1.8	63.611	0.744	15.641	2.794	0.062	4.073	6.98	2.739	0.336	0.437	1.596	99.013	n.g.	n.g.	n.g.	n.g.	94.8	n.g.	39.2	n.g.	n.g.	n.g.	13	1170	21.3656	196	12.9	n.g.	262	21.5	48.3	6.57	28	6.07	1.77198	5.33963	0.745	3.74869	0.7	1.9	0.248	1.65
Wang et al., 2011	Pulang pluton	BQ-48	Quartz diorite porphyry	99.986	28.0434			60.546	0.688	14.852	5.772	0.083	3.964	4.733	3.073	4.447	0.423	1.245	99.826	n.g.	n.g.	n.g.	n.g.	70.7	n.g.	26.5345	n.g.	n.g.	n.g.	136	742	20.4218	188.877	12.2	n.g.	2310	39.1	76.1	8.5	33.5	6.8321	1.65301	5.92508	0.778	3.44	0.694	1.88	0.245	1.64
Wang et al., 2011	Pulang pluton	BQ-52	Quartz diorite porphyry	99.986	28.0434			61.597	0.636	14.707	5.591	0.073	3.61	4.799	3.055	4.243	0.386	1.072	99.769	n.g.	n.g.	n.g.	n.g.	68.3	n.g.	28.2	n.g.	n.g.	n.g.	135	792	18.1718	170	11.9	n.g.	2170	37.7	69.6	8.1	30.9	5.99	1.54296	5.21405	0.72	3.39267	0.664	1.71	0.223	1.47
Wang et al., 2011	Pulang pluton	BQ-52X	Quartz diorite porphyry	99.986	28.0434			63.693	0.615	15.298	5.528	0.068	3.728	4.652	2.008	2.606	0.345	1.373	99.914	n.g.	n.g.	n.g.	n.g.	68	n.g.	29.5	n.g.	n.g.	n.g.	126	838	18.1718	188	11.5	n.g.	2060	37.3	65.7	7.86	30.1	5.81	1.56308	4.92163	0.714	3.24607	0.639	1.63	0.229	1.52
Wang et al., 2011	Pulang pluton	BQ-54	Quartz diorite porphyry	99.986	28.0434			61.318	0.659	14.931	5.702	0.065	3.612	4.542	3.222	4.422	0.373	1.369	100.215	n.g.	n.g.	n.g.	n.g.	61.4	n.g.	22.1	n.g.	n.g.	n.g.	153	716	18.1718	175	11.6	n.g.	2110	36	66.1	7.58	29.2	5.7	1.58085	5.13826	0.693	3.28796	0.655	1.71	0.23	1.51
Wang et al., 2011	Pulang pluton	BQ-57	Quartz diorite porphyry	99.986	28.0434			61.899	0.645	15.091	4.583	0.073	3.782	4.691	3.542	4.319	0.385	0.752	99.762	n.g.	n.g.	n.g.	n.g.	59.2	n.g.	19.6	n.g.	n.g.	n.g.	134	884	18.0617	172	11.6	n.g.	2280	41.6	69.6	8.38	32.2	6.08	1.64262	5.08442	0.729	3.4555	0.649	1.8	0.228	1.59
Wang et al., 2011	Pulang pluton	BQ-58	Quartz diorite porphyry	99.986	28.0434			63.281	0.709	15.333	5.692	0.076	4.145	4.901	1.718	2.431	0.381	1.234	99.901	n.g.	n.g.	n.g.	n.g.	67.4	n.g.	26.2	n.g.	n.g.	n.g.	146	842	20.0441	189	12.6	n.g.	2090	38.5	71.7	8.3	32.3	6.26	1.63126	5.57791	0.757	3.68586	0.691	1.8	0.247	1.72
Wang et al., 2011	Pulang pluton	BQ-60	Quartz diorite porphyry	99.986	28.0434			60.604	0.65	15.082	4.664	0.066	3.756	4.214	4.032	5.155	0.366	1.268	99.857	n.g.	n.g.	n.g.	n.g.	71.6	n.g.	30.7	n.g.	n.g.	n.g.	151	841	19.163	174	12.3	n.g.	2630	38.6	67.6	8.09	31	6.04	1.75053	5.37808	0.744	3.67539	0.708	1.82	0.232	1.64
Wang et al., 2011	Pulang pluton	BQ-62	Quartz diorite porphyry	99.986	28.0434			63.1	0.605	14.963	3.398	0.034	3.637	3.426	3.274	5.464	0.368	0.739	99.008	n.g.	n.g.	n.g.	n.g.	60.4	n.g.	24.1	n.g.	n.g.	n.g.	196	880	17.7313	176	11.8	n.g.	2630	38.6	69.7	7.9	30.2	5.64	1.61098	4.93767	0.692	3.3089	0.618	1.69	0.227	1.52
Wang et al., 2011	Pulang pluton	BQ-66	Quartz diorite porphyry	99.986	28.0434			63.922	0.654	14.588	3.294	0.038	3.955	3.577	2.731	4.445	0.397	1.176	98.777	n.g.	n.g.	n.g.	n.g.	72.5	n.g.	19.3	n.g.	n.g.	n.g.	173	841	18.3921	179	12	n.g.	2500	35.1	64.7	7.34	27.7	5.45	1.45951	4.61634	0.693	3.44503	0.653	1.81	0.238	1.64
Wang et al., 2011	Pulang pluton	BQ-206	Quartz diorite porphyry	99.986	28.0434			63.011	0.628	14.906	6.154	0.038	3.669	3.735	2.563	4.005	0.387	0.831	99.927	n.g.	n.g.	n.g.	n.g.	61.2	n.g.	32.4835	n.g.	n.g.	n.g.	232	841	17.3141	160.546	10.9	n.g.	2010	30.9	57.9	6.81	26.4	5.20591	1.46456	4.30647	0.616	2.92	0.582	1.55	0.197	1.35
Wang et al., 2011	Disuga	BQ-25	Quartz diorite	99.9221	28.1698	219.8	3	64.449	0.513	16.073	4.806	0.138	2.699	1.561	2.686	3.212	0.378	3.186	99.701	n.g.	n.g.	n.g.	n.g.	31.2	n.g.	22	n.g.	n.g.	n.g.	68.1	565	19.6035	163	10.1	n.g.	2140	37.8	68.4	7.98	29.7	5.19	1.37356	4.36432	0.628	2.95288	0.599	1.63	0.215	1.48
Wang et al., 2011	Disuga	BQ-86	Quartz diorite	99.9221	28.1698			64.209	0.503	15.158	4.254	0.062	2.551	3.765	2.834	4.349	0.309	1.357	99.351	n.g.	n.g.	n.g.	n.g.	40.7	n.g.	16.2	n.g.	n.g.	n.g.	140	767	19.0529	170	13.4	n.g.	1620	33.9	62.8	7.18	26.4	5.28	1.37807	4.35184	0.654	3.13089	0.599	1.68	0.21	1.51
Wang et al., 2011	Disuga	BQ-90	Quartz diorite	99.9221	28.1698			63.257	0.522	15.369	4.728	0.073	2.805	3.989	3.056	4.559	0.326	1.227	99.911	n.g.	n.g.	n.g.	n.g.	46.7	n.g.	17.2	n.g.	n.g.	n.g.	129	830	16.8502	145	10.7	n.g.	1860	31.9	58.7	6.72	25.7	4.97	1.37635	4.23172	0.589	2.85864	0.546	1.51	0.208	1.34
Wang et al., 2011	Disuga	BQ-91	Quartz diorite	99.9221	28.1698			62.202	0.532	14.755	5.31	0.048	2.865	4.339	2.879	4.103	0.331	1.605	98.969	n.g.	n.g.	n.g.	n.g.	57.6	n.g.	23.6	n.g.	n.g.	n.g.	107	984	16.7401	154	10.4	n.g.	1970	32	57.7	6.74	24.9	4.85	1.36854	4.04166	0.593	2.87958	0.542	1.54	0.206	1.37
Wang et al., 2011	Disuga	BQ-96	Quartz diorite	99.9221	28.1698			63.563	0.534	15.379	4.593	0.074	3.169	4.181	1.583	2.354	0.323	3.838	99.591	n.g.	n.g.	n.g.	n.g.	53.9	n.g.	20.2425	n.g.	n.g.	n.g.	107	994	16.3987	154	10.5	n.g.	1970	31.3	58.6	6.72	25.4	4.91	1.40546	4.39558	0.585	2.78	0.551	1.5	0.204	1.36
Wang et al., 2011	Disuga	BQ-98	Quartz diorite	99.9221	28.1698			61.162	0.568	14.799	5.146	0.089	3.36	5.083	2.371	3.072	0.365	3.734	99.749	n.g.	n.g.	n.g.	n.g.	56	n.g.	22.8545	n.g.	n.g.	n.g.	92.6	1100	16.8274	155	10.4	n.g.	2310	32.4	62.5	7.1	27	5.3	1.39751	4.57696	0.639	2.87	0.592	1.6	0.219	1.46
Wang et al., 2011	Xuejiping pluton	BQ-11	Monzonite	99.811	28.0094			57.409	1.288	15.306	7.656	0.119	3.802	5.922	3.533	2.875	0.425	1.61	99.945	n.g.	n.g.	n.g.	n.g.	38.4	n.g.	24.8134	n.g.	n.g.	n.g.	81.6	1830	19.8285	187	16.6	n.g.	2600	46.1	82.9	9.34	35.2	6.53	1.83105	5.59564	0.755	3.52	0.697	1.83	0.23	1.5
Wang et al., 2011	Xuejiping pluton	BQ-12	Monzonite	99.811	28.0094			62.955	0.901	15.846	5.723	0.081	2.996	1.559	3.839	1.7	0.38	3.413	99.393	n.g.	n.g.	n.g.	n.g.	28.9	n.g.	17.9104	n.g.	n.g.	n.g.	49.2	1010	18.2208	190	19.2	n.g.	5470	55.9	91.8	10.2	35.9	6.12	1.65037	5.12145	0.71	3.14	0.636	1.73	0.217	1.47
Wang et al., 2011	Xuejiping pluton	BQ-13	Monzonite	99.811	28.0094			62.096	0.863	16.008	5.688	0.094	2.803	4.006	3.528	2.679	0.341	1.715	99.821	n.g.	n.g.	n.g.	n.g.	27.8	n.g.	18.0037	n.g.	n.g.	n.g.	78.8	1670	17.4705	195	19.2	n.g.	2660	59.7	100	10.8	37.1	6.09	1.63966	5.05578	0.659	3.01	0.614	1.65	0.222	1.43
Wang et al., 2011	Xuejiping pluton	BQ-14	Monzonite	99.811	28.0094			63.635	0.842	16.001	5.627	0.094	2.947	3.169	2.325	1.541	0.321	3.576	100.078	n.g.	n.g.	n.g.	n.g.	25.3	n.g.	15.8582	n.g.	n.g.	n.g.	65.6	1340	20.2572	189	18.6	n.g.	2710	57.5	91	10.7	37.1	6.17	1.74014	5.19571	0.704	3.15	0.623	1.69	0.236	1.45
Wang et al., 2011	Xuejiping pluton	BQ-15	Monzonite	99.811	28.0094			61.362	0.854	15.626	5.701	0.102	2.958	3.863	4.185	2.742	0.338	2.187	99.918	n.g.	n.g.	n.g.	n.g.	35.7	n.g.	20.9888	n.g.	n.g.	n.g.	69.3	1610	16.9346	186	18.2	n.g.	3010	58.5	95.5	10.5	36.4	6.02	1.59645	4.9059	0.674	2.97	0.61	1.66	0.206	1.4
Wang et al., 2011	Xuejiping pluton	BQ-16	Monzonite	99.811	28.0094			61.992	0.87	15.728	5.781	0.104	2.933	2.646	3.846	2.456	0.342	3.092	99.79	n.g.	n.g.	n.g.	n.g.	27.6	n.g.	17.444	n.g.	n.g.	n.g.	66.5	1380	20.5788	202	19.6	n.g.	2820	62.5	101	11.7	40.6	6.65	1.72703	5.44527	0.756	3.37	0.69	1.82	0.237	1.57
Wang et al., 2011	Xuejiping pluton	BQ-153	Monzonite	99.811	28.0094			64.592	0.79	15.411	5.52	0.033	3.191	0.704	3.524	2.734	0.312	2.801	99.612	n.g.	n.g.	n.g.	n.g.	31.2	n.g.	16.1	n.g.	n.g.	n.g.	87.7	793	13.3833	192	17.2	n.g.	1710	45.1	75.2	7.69	26.5	4.31	1.14658	3.4278	0.521	2.31	0.482	1.38	0.179	1.22
Wang et al., 2011	Xuejiping pluton	BQ-171	Monzonite	99.811	28.0094			59.985	0.918	15.212	6.242	0.096	3.322	3.149	4.096	2.743	0.375	3.862	100	n.g.	n.g.	n.g.	n.g.	29.9	n.g.	18.9802	n.g.	n.g.	n.g.	70.8	960	17.758	158.447	16.4	n.g.	3370	50.7	86.1	9.45	34.2	6.07181	1.62879	4.68715	0.663	2.94	0.611	1.59	0.212	1.33
Wang et al., 2011	Xuejiping pluton	BQ-172	Monzonite	99.811	28.0094			59.665	0.936	15.682	6.504	0.085	3.118	2.69	3.768	3.149	0.382	3.714	99.693	n.g.	n.g.	n.g.	n.g.	31.5	n.g.	20.7	n.g.	n.g.	n.g.	89.1	930	18.3084	177	17.5	n.g.	2920	52	86.8	9.57	34.5	5.88	1.48601	4.67042	0.689	3.13	0.643	1.81	0.228	1.49
Wang et al., 2011	Xuejiping pluton	BQ-173	Monzonite	99.811	28.0094			59.637	0.928	15.131	6.211	0.09	3.342	4.177	3.853	2.759	0.396	3.283	99.807	n.g.	n.g.	n.g.	n.g.	80.2	n.g.	65.8168	n.g.	n.g.	n.g.	63.3	1360	16.8701	174.187	17.1	n.g.	2570	51.6	87.3	9.36	34	5.91341	1.59846	4.82889	0.647	2.97	0.596	1.58	0.203	1.33
Wang et al., 2011	Xuejiping pluton	BQ-185	Monzonite	99.811	28.0094			61.683	0.888	15.883	5.511	0.148	2.624	3.773	4.37	3.33	0.353	1.398	99.961	n.g.	n.g.	n.g.	n.g.	16.3	n.g.	12.2757	n.g.	n.g.	n.g.	83.4	1730	20.9767	227.702	22.5	n.g.	3760	58.9	104	10.9	39.4	6.73706	1.64679	5.42462	0.738	3.56	0.71	2.02	0.257	1.67
Wang et al., 2011	Xuejiping pluton	BQ-186	Monzonite	99.811	28.0094			62.049	0.895	15.914	5.668	0.16	2.611	3.885	4.216	2.434	0.357	1.523	99.712	n.g.	n.g.	n.g.	n.g.	16.5	n.g.	12.559	n.g.	n.g.	n.g.	66.3	1700	21.0877	229.801	22.6	n.g.	2670	62.5	111	11.2	40.4	6.86378	1.72453	5.24924	0.74	3.44	0.681	1.9	0.251	1.62
Wang et al., 2011	Xuejiping pluton	BQ-188	Monzonite	99.811	28.0094			60.804	0.894	16.004	5.96	0.115	2.588	3.852	4.562	3.015	0.353	1.05	99.197	n.g.	n.g.	n.g.	n.g.	18.1	n.g.	12.7479	n.g.	n.g.	n.g.	85.9	1550	21.6426	233.998	23	n.g.	2510	62.5	111	11.5	40.9	7.34952	1.83714	5.27968	0.752	3.48	0.717	1.94	0.259	1.7
Wang et al., 2011	Xuejiping pluton	BQ-190	Monzonite	99.811	28.0094			57.485	1.272	15.449	7.548	0.123	3.926	5.213	3.603	3.218	0.428	1.689	99.954	n.g.	n.g.	n.g.	n.g.	40.7	n.g.	27.9	n.g.	n.g.	n.g.	95.7	1570	20.5947	177	16.7	n.g.	2600	47.4	80.1	9.56	35.8	6.45	1.87148	5.85329	0.803	3.91623	0.745	1.94	0.251	1.53
Wang et al., 2011	Xuejiping pluton	BQ-191	Monzonite	99.811	28.0094			57.175	1.282	15.343	7.75	0.119	3.876	5.763	3.241	2.893	0.445	1.83	99.717	n.g.	n.g.	n.g.	n.g.	39.1	n.g.	29.4	n.g.	n.g.	n.g.	86.6	1980	19.3833	179	16.9	n.g.	2710	47.5	83	9.57	35.6	6.53	1.86457	5.64042	0.778	3.68586	0.68	1.92	0.246	1.54
Wang et al., 2011	Xuejiping pluton	BQ-192	Monzonite	99.811	28.0094			57.6	1.279	15.356	7.572	0.107	4.012	4.611	3.636	3.089	0.433	2.001	99.696	n.g.	n.g.	n.g.	n.g.	52.9	n.g.	31.8225	n.g.	n.g.	n.g.	88.4	1590	19.6448	189.927	17.1	n.g.	2740	47.2	82.6	9.48	35.5	6.84266	1.85915	5.35742	0.758	3.5	0.677	1.82	0.238	1.54
Wang et al., 2011	Xuejiping pluton	BQ-193	Monzonite	99.811	28.0094			58.186	1.236	14.993	7.196	0.106	4.061	4.372	4.014	3.436	0.409	1.825	99.834	n.g.	n.g.	n.g.	n.g.	40.1	n.g.	28.9	n.g.	n.g.	n.g.	88.3	1390	18.1718	179	16.3	n.g.	2660	44.8	79	8.92	32.9	5.77	1.67818	5.21914	0.705	3.39267	0.656	1.79	0.223	1.46
Wang et al., 2011	Xuejiping pluton	BQ-194	Monzonite	99.811	28.0094			56.62	1.257	15.1	7.402	0.131	3.495	4.619	4.427	2.499	0.437	3.48	99.467	n.g.	n.g.	n.g.	n.g.	41.3	n.g.	28.6	n.g.	n.g.	n.g.	57.7	1370	20.2643	181	16.9	n.g.	2390	47.3	81.9	9.47	35.4	6.42	1.84062	5.52195	0.783	3.71728	0.731	1.94	0.231	1.58
Wang et al., 2011	Xuejiping pluton	BQ-195	Monzonite	99.811	28.0094			58.009	1.341	16.117	6.834	0.129	4.077	2.503	3.593	3.589	0.445	2.892	99.529	n.g.	n.g.	n.g.	n.g.	38.7	n.g.	24.5	n.g.	n.g.	n.g.	88.4	1320	20.7048	186	17.1	n.g.	3310	49.6	83.7	9.99	37.1	6.76	1.76505	5.75769	0.809	3.8534	0.737	1.99	0.25	1.66
Wang et al., 2011	Pingdong stock	BQ-153A	Granodiorite	28.0009	99.8291			65.251	0.605	14.2	3.854	0.096	1.724	2.917	3.267	2.581	0.202	4.3925	99.0895	n.g.	n.g.	n.g.	n.g.	14.9	n.g.	10.2612	n.g.	n.g.	n.g.	79.2	781	14.4695	169	18.3	n.g.	2070	45.6	75.6	7.99	27.1	4.62	1.16506	3.73957	0.529	2.46	0.508	1.38	0.188	1.27
Wang et al., 2011	Pingdong stock	BQ-155A	Granodiorite	28.0009	99.8291	230.3	1.7	66.31	0.589	14.392	3.869	0.078	1.748	2.057	4	3.987	0.199	2.51	99.739	n.g.	n.g.	n.g.	n.g.	18.3	n.g.	12.9664	n.g.	n.g.	n.g.	115	842	14.1479	174	17.9	n.g.	2140	41.7	68.5	7.14	24.4	4.2	1.14156	3.3919	0.505	2.39	0.47	1.31	0.182	1.22
Wang et al., 2011	Disuga	YD-9	Volcanic rocks	99.9291	28.1777			61.288	0.729	17.479	4.239	0.072	2.174	2.428	2.99	4.433	0.415	3.499	99.746	n.g.	n.g.	n.g.	n.g.	24.9	n.g.	16.3	n.g.	n.g.	n.g.	92.2	548	13.8116	195	18.2	n.g.	2150	59.3	102	11	38.9	6.18	1.54328	4.86955	0.659	2.78	0.519	1.49	0.19	1.21
Wang et al., 2011	Disuga	YD-34	Volcanic rocks	99.9291	28.1777			62.648	0.58	15.413	4.735	0.087	2.294	3.687	3.143	2.137	0.289	4.636	99.649	n.g.	n.g.	n.g.	n.g.	23.4	n.g.	11.7092	n.g.	n.g.	n.g.	59.5	432	15.5383	172.088	12.4	n.g.	2260	35.3	62.5	6.91	25.2	4.78353	0.962075	3.55671	0.518	2.53	0.514	1.55	0.208	1.42
Wang et al., 2011	Disuga	YD-35	Volcanic rocks	99.9291	28.1777			58.881	0.725	16.459	5.395	0.139	2.249	6.386	3.172	0.943	0.322	5.602	100.273	n.g.	n.g.	n.g.	n.g.	51.8	n.g.	29.5	n.g.	n.g.	n.g.	39.3	505	17.5303	162	12.7	n.g.	606	32.8	59.2	6.53	23.9	4.37	1.00061	3.68532	0.537	2.74921	0.557	1.56	0.223	1.53682
Wang et al., 2011	Disuga	YD-36	Volcanic rocks	99.9291	28.1777			61.447	0.573	15.097	4.423	0.095	2.045	4.34	3.344	2.614	0.258	5.205	99.441	n.g.	n.g.	n.g.	n.g.	14.3	n.g.	8.61	n.g.	n.g.	n.g.	62.8	826	15.4355	164	11.9	n.g.	2400	31.5	57.6	6.24	22.4	3.99	1.01777	3.57017	0.506	2.69675	0.536	1.49	0.202	1.46211
Wang et al., 2011	Disuga	YD-37	Volcanic rocks	99.9291	28.1777			60.174	0.581	15.128	4.386	0.096	1.909	5.804	3.671	1.612	0.272	5.594	99.227	n.g.	n.g.	n.g.	n.g.	19.9	n.g.	11.1	n.g.	n.g.	n.g.	36.6	755	15.3252	156	12.2	n.g.	1710	30.5	53.2	5.88	21.4	3.72	1.23729	3.16669	0.47	2.4659	0.499	1.47	0.2	1.47279
Wang et al., 2011	Disuga	YD-38	Volcanic rocks	99.9291	28.1777	220.7	2	61.848	0.599	15.725	4.749	0.097	2.302	3.868	3.807	1.872	0.292	4.544	99.703	n.g.	n.g.	n.g.	n.g.	35.9	n.g.	17.9415	n.g.	n.g.	n.g.	37.7	672	15.8713	178.384	12.1	n.g.	1910	32.1	58.1	6.43	24.1	4.61457	1.14763	3.52672	0.517	2.66	0.551	1.51	0.215	1.45
Wang et al., 2011	Disuga	YD-39	Volcanic rocks	99.9291	28.1777			62.152	0.583	15.559	4.591	0.082	2.116	3.793	3.659	2.193	0.279	4.788	99.795	n.g.	n.g.	n.g.	n.g.	19.3	n.g.	9.63173	n.g.	n.g.	n.g.	48.8	752	15.5383	166.842	12.1	n.g.	1780	29.6	54.7	6.21	22.8	4.44562	0.934697	3.51873	0.523	2.71	0.558	1.55	0.218	1.39
Wang et al., 2011	Disuga	YD-40	Volcanic rocks	99.9291	28.1777			61.282	0.46	16.861	4.591	0.075	2.622	2.902	4.425	3.832	0.209	3.162	100.421	n.g.	n.g.	n.g.	n.g.	30.2	n.g.	11.237	n.g.	n.g.	n.g.	86.1	921	15.3163	171.039	7.64	n.g.	1730	34.9	64.4	6.96	25	4.58289	1.13915	3.79002	0.538	2.57	0.544	1.51	0.215	1.51
Wang et al., 2011	Disuga	YD-42	Volcanic rocks	99.9291	28.1777			65.038	0.412	16.068	4.165	0.069	2.081	2.872	3.376	3.898	0.187	1.256	99.422	n.g.	n.g.	n.g.	n.g.	23.8	n.g.	9.91501	n.g.	n.g.	n.g.	91.9	927	14.3174	182.581	7.46	n.g.	2190	37.1	62	7.12	25.6	4.5301	1.09663	3.71796	0.474	2.39	0.485	1.38	0.2	1.39
Wang et al., 2011	Disuga	YD-49	Volcanic rocks	99.9291	28.1777			65.228	0.455	14.659	4.857	0.081	2.884	4.909	2.942	2.483	0.197	0.806	99.501	n.g.	n.g.	n.g.	n.g.	45.7	n.g.	14.7309	n.g.	n.g.	n.g.	64.5	776	14.7614	152.151	7.61	n.g.	1880	32.3	60.6	6.83	25.2	4.76241	1.1607	4.05837	0.533	2.47	0.502	1.52	0.21	1.43
Wang et al., 2011	Disuga	YD-50	Volcanic rocks	99.9291	28.1777			62.095	0.622	15.471	5.074	0.072	2.583	3.576	2.368	3.293	0.145	4.607	99.906	n.g.	n.g.	n.g.	n.g.	16.7	n.g.	9.82059	n.g.	n.g.	n.g.	91.6	523	14.8724	133.263	12.6	n.g.	1310	29.7	52.7	5.57	20	3.97043	1.0707	3.30412	0.456	2.45	0.519	1.46	0.209	1.41
Wang et al., 2011	Disuga	YD-54	Volcanic rocks	99.9291	28.1777			64.499	0.528	15.546	3.157	0.045	2.371	2.92	1.924	3.013	0.155	5.262	99.42	n.g.	n.g.	n.g.	n.g.	16.3	n.g.	6.08121	n.g.	n.g.	n.g.	79.6	258	15.5383	157.398	12.6	n.g.	1050	29.9	52.7	5.65	19.9	3.74868	0.938456	3.0425	0.477	2.42	0.508	1.49	0.216	1.49
Wang et al., 2011	Disuga	YD-65	Volcanic rocks	99.9291	28.1777			62.03	0.796	17.102	5.063	0.044	3.271	3.598	2.843	1.79	0.134	2.839	99.51	n.g.	n.g.	n.g.	n.g.	26.7	n.g.	10.8	n.g.	n.g.	n.g.	44.5	565	17.0236	153	12.2	n.g.	1110	32.8	61.1	6.66	23.9	4.35	1.13819	3.73135	0.572	2.82	0.6	1.65	0.227	1.55
Wang et al., 2011	Disuga	YD-67	Volcanic rocks	99.9291	28.1777			60.291	0.545	14.764	4.959	0.096	3.167	4.62	3.208	2.837	0.368	4.719	99.574	n.g.	n.g.	n.g.	n.g.	53.2	n.g.	22.1	n.g.	n.g.	n.g.	74.3	708	15.656	158	10.6	n.g.	1260	31.2	57.3	6.57	24.4	4.85	1.27061	4.07933	0.564	2.75971	0.525	1.44	0.188	1.41942
Wang et al., 2011	Disuga	YD-68	Volcanic rocks	99.9291	28.1777			60.325	0.553	14.751	5.139	0.109	3.264	5.414	3.22	2.111	0.374	4.372	99.632	n.g.	n.g.	n.g.	n.g.	49.5	n.g.	19.4523	n.g.	n.g.	n.g.	58.6	860	17.0921	145.855	10.6	n.g.	766	33.5	63	7.14	26.8	5.32207	1.25986	4.71339	0.63	2.88	0.587	1.6	0.218	1.4
Wang et al., 2011	Disuga	YD-69	Volcanic rocks	99.9291	28.1777			59.875	0.546	14.385	4.955	0.092	3.126	4.445	3.162	3.738	0.361	4.434	99.119	n.g.	n.g.	n.g.	n.g.	57.4	n.g.	22.5685	n.g.	n.g.	n.g.	109	901	17.3141	136.411	10.3	n.g.	1860	33.8	62.1	7.18	27	5.41711	1.45268	4.30367	0.625	2.85	0.592	1.62	0.227	1.45
Wang et al., 2011	Disuga	YD-71	Volcanic rocks	99.9291	28.1777			61.44	0.582	15.551	4.553	0.082	1.907	3.843	3.615	2.712	0.177	4.568	99.03	n.g.	n.g.	n.g.	n.g.	28.4	n.g.	12.4646	n.g.	n.g.	n.g.	76.5	716	13.8735	141.658	11.2	n.g.	1460	30.7	53.6	5.78	20.6	3.89652	0.904245	2.97351	0.464	2.24	0.496	1.33	0.181	1.3
Wang et al., 2011	Disuga	YD-72	Volcanic rocks	99.9291	28.1777			61.745	0.563	15.787	5.17	0.086	2.12	4.084	3.032	3.179	0.176	3.708	99.65	n.g.	n.g.	n.g.	n.g.	15.1	n.g.	6.57224	n.g.	n.g.	n.g.	90.2	832	14.7614	140.609	11.2	n.g.	1660	30.9	54.4	5.8	20.9	3.97043	0.96467	3.2777	0.464	2.34	0.506	1.42	0.204	1.34
Leng et al., 2014	Disuga	DSG04-1	Volcanic rocks	99.9154	28.1622			55.18	1.45	15.15	8.76	0.13	4.9	6.03	3.18	1.99	0.42	2.02	99.21	n.g.	n.g.	n.g.	186	43.2	22.3	25.8	n.g.	n.g.	n.g.	55.3	1100	22.4	173	16.6	1.9	1447	49.2	91.3	10.7	41.3	7.57	2.01	6.45	0.84	4.62	0.85	2.38	0.32	1.97
Leng et al., 2014	Disuga	DSG04-2	Volcanic rocks	99.9154	28.1622			51.59	1.53	15.77	9.84	0.15	5.41	7.3	2.59	2.16	0.42	2.38	99.14	n.g.	n.g.	n.g.	201	45.2	25.7	27.6	n.g.	n.g.	n.g.	80.2	1411	23.7	191	18.4	3.5	1298	55.7	97.5	12.1	45.8	8.22	2.24	7.01	0.91	4.99	0.93	2.58	0.34	2.15
Leng et al., 2014	Disuga	DSG04-3	Volcanic rocks	99.9154	28.1622			52.61	1.5	15.8	9.39	0.14	5.27	6.27	2.99	2.26	0.44	2.51	99.18	n.g.	n.g.	n.g.	201	42.5	25	26.7	n.g.	n.g.	n.g.	71.5	1163	22.6	188	18	2.43	1710	51.2	93.9	11.6	44.2	8.08	2.11	6.79	0.86	4.81	0.9	2.48	0.32	2.07
Leng et al., 2014	Disuga	DSG07-1	Volcanic rocks	99.9154	28.1622			59.77	1.15	14.99	6.77	0.12	2.54	6.96	4.66	1.53	0.36	1.13	99.98	n.g.	n.g.	n.g.	225	50.8	12.9	22.4	n.g.	n.g.	n.g.	31.5	1470	18.7	176	13.7	1.83	1307	44.5	80	9.1	33.1	5.79	1.7	4.8	0.67	3.65	0.72	1.83	0.25	1.63
Leng et al., 2014	Disuga	DSG07-3-1	Volcanic rocks	99.9154	28.1622	218.1	4.8	57.59	1.04	13.26	7.96	0.13	4.8	6.38	2.92	2.64	0.31	1.47	98.5	n.g.	n.g.	n.g.	226	83.8	26.8	36.2	n.g.	n.g.	n.g.	70.3	1190	17.4	150	11.9	3.56	5233	37.4	68.9	7.96	30.6	5.71	1.57	4.92	0.69	3.66	0.69	1.92	0.25	1.57
Leng et al., 2014	Disuga	DSG07-3-2	Volcanic rocks	99.9154	28.1622			58.3	0.92	15.64	6.01	0.13	1.83	9.55	4.32	1.33	0.33	1.63	99.99	n.g.	n.g.	n.g.	269	42.1	7.2	15.8	n.g.	n.g.	n.g.	23.1	1890	16.1	170	12.3	1.11	1449	44.2	77.8	8.68	31.9	5.4	1.59	4.58	0.62	3.41	0.65	1.71	0.22	1.5
Leng et al., 2014	Disuga	DSG07-4	Volcanic rocks	99.9154	28.1622			53.62	1.18	15.3	8.94	0.14	4.98	7.7	3.16	1.95	0.37	2.61	99.95	n.g.	n.g.	n.g.	251	57.7	29	33.3	n.g.	n.g.	n.g.	55	1629	18.4	171	13.6	3.27	1518	39.7	75.5	8.84	33	5.85	1.83	5.1	0.72	3.9	0.76	1.96	0.25	1.68
Leng et al., 2014	Disuga	DSG07-5	Volcanic rocks	99.9154	28.1622	220.8	5.3	54.11	1.16	17.19	8.07	0.11	4.34	4.02	3.18	4.87	0.48	2.3	99.83	n.g.	n.g.	n.g.	224	40.9	21	22.4	n.g.	n.g.	n.g.	101	1120	20.8	215	17.8	2.9	11526	54.5	98.8	11.1	40.3	7.09	1.59	5.8	0.81	4.22	0.81	2.2	0.29	1.89
Leng et al., 2014	Disuga	DSG07-7	Volcanic rocks	99.9154	28.1622	219.8	1.9	55.13	1.07	13.89	8.71	0.13	4.42	5.32	2.12	5.37	0.35	3.42	99.93	n.g.	n.g.	n.g.	224	64.9	26	33.1	n.g.	n.g.	n.g.	140	987	17.4	156	12.7	7.75	13007	40.7	74.7	8.72	32.8	5.87	1.36	5.56	0.7	3.72	0.7	1.92	0.26	1.76
Leng et al., 2014	Disuga	DSG07-8	Volcanic rocks	99.9154	28.1622			62.14	0.93	14.26	5.89	0.1	1.62	3.96	4.65	3.35	0.33	2.39	99.62	n.g.	n.g.	n.g.	143	42.6	13.2	17.5	n.g.	n.g.	n.g.	88.8	1090	15.8	201	15.7	4.51	4984	48.7	84.8	9.28	34.1	5.76	1.44	4.6	0.65	3.48	0.63	1.64	0.21	1.44
Leng et al., 2014	Disuga	DSG07-8-2	Volcanic rocks	99.9154	28.1622			60.98	0.93	14.26	5.9	0.11	1.67	4.34	4.7	3.38	0.32	2.8	99.39	n.g.	n.g.	n.g.	140	47.4	13	31.8	n.g.	n.g.	n.g.	90.7	1090	15.8	198	14.8	4.72	5146	48.4	84.2	9.25	33.1	5.75	1.42	4.79	0.66	3.34	0.62	1.7	0.22	1.48
Leng et al., 2014	Disuga	DSG10-1	Volcanic rocks	99.9154	28.1622			54.89	0.72	15.78	5.71	0.1	2.53	5.67	3.74	2.24	0.4	7.03	98.81	n.g.	n.g.	n.g.	161	60	16.3	21	n.g.	n.g.	n.g.	58.3	1650	16.2	178	14.2	2.61	2010	61.1	108	11.6	40.8	6.58	1.62	5.83	0.67	3.28	0.59	1.75	0.23	1.39
Leng et al., 2014	Disuga	DSG10-2	Volcanic rocks	99.9154	28.1622			50.75	1.02	21.92	8.07	0.07	2.46	1.73	3.24	4.63	0.24	4.29	98.42	n.g.	n.g.	n.g.	179	60	14.6	24	n.g.	n.g.	n.g.	131	1475	23.9	259	19.8	7.07	4110	75.5	139	16.1	56.9	9.28	2.2	8.15	0.98	4.58	0.86	2.39	0.32	1.95
Leng et al., 2014	Disuga	DSG10-3	Volcanic rocks	99.9154	28.1622			58	0.74	15.65	5.49	0.09	1.97	4.55	4.21	2.54	0.39	5.69	99.32	n.g.	n.g.	n.g.	161	50	23.3	33	n.g.	n.g.	n.g.	56.1	2080	17.3	175	14.1	2.79	2910	61.9	110	11.9	40.9	6.87	1.64	6.01	0.72	3.4	0.64	1.8	0.24	1.52
Leng et al., 2014	Disuga	DSG10-4	Volcanic rocks	99.9154	28.1622			57.25	0.8	16.79	4.85	0.06	1.82	3.66	4.65	2.55	0.42	5.22	98.07	n.g.	n.g.	n.g.	182	60	12.9	22	n.g.	n.g.	n.g.	65.1	1710	16.6	196	15.9	2.59	2460	67	122	12.9	44.9	7.35	1.65	6.28	0.74	3.47	0.65	1.8	0.25	1.5
Leng et al., 2014	Disuga	DSG10-5	Volcanic rocks	99.9154	28.1622			55.16	0.74	15.42	5.69	0.1	3	5.07	4.43	1.57	0.4	6.65	98.23	n.g.	n.g.	n.g.	170	60	19	27	n.g.	n.g.	n.g.	40.6	1825	15.8	179	14.2	2.07	1725	60.5	108	11.5	40.2	6.59	1.36	5.66	0.66	3.18	0.59	1.68	0.23	1.4
Leng et al., 2014	Disuga	DSG10-6	Volcanic rocks	99.9154	28.1622			58.26	0.76	16.48	4.92	0.05	1.17	4.52	4.95	2.44	0.43	4.59	98.57	n.g.	n.g.	n.g.	164	50	15.6	17	n.g.	n.g.	n.g.	67.2	1845	16.9	187	15.3	2.06	2060	66	118	12.5	43.7	7.01	1.79	6.16	0.73	3.49	0.63	1.79	0.24	1.49
Leng et al., 2014	Disuga	DSG10-7	Volcanic rocks	99.9154	28.1622			57.43	0.74	16.07	6.55	0.05	1.28	4.27	5.49	1.38	0.43	4.24	97.93	n.g.	n.g.	n.g.	114	50	12.2	18	n.g.	n.g.	n.g.	35.3	1510	19.7	181	14.8	1.11	976	60.1	112	12.6	44.7	7.13	1.72	6.4	0.77	3.78	0.71	2.12	0.28	1.76
Leng et al., 2014	Disuga	DSG10-8	Volcanic rocks	99.9154	28.1622			55.92	0.7	15.64	5.74	0.09	2.28	5.48	4.3	2.82	0.37	5.28	98.62	n.g.	n.g.	n.g.	153	40	14.8	24	n.g.	n.g.	n.g.	75.3	1265	17	182	13.9	4.2	1780	54.8	103	11.5	40.6	6.58	1.61	5.72	0.69	3.34	0.63	1.86	0.24	1.56
Leng et al., 2014	Disuga	DSG10-11	Volcanic rocks	99.9154	28.1622			56.88	1.08	14.89	6.73	0.1	3.7	4.61	2.5	2.71	0.33	5.11	98.64	n.g.	n.g.	n.g.	263	50	19	19	n.g.	n.g.	n.g.	59.2	1190	18.3	165	12.7	3.92	4130	46.5	85.5	9.72	35.3	6.37	1.66	5.67	0.72	3.63	0.69	1.89	0.25	1.5
Leng et al., 2014	Disuga	DSG10-12	Volcanic rocks	99.9154	28.1622			52.73	1.31	16.71	8.69	0.13	4.37	6.87	4.15	1.46	0.38	1.99	98.79	n.g.	n.g.	n.g.	294	40	25.5	24	n.g.	n.g.	n.g.	58.6	1570	21.6	213	16.5	2.73	1020	55.1	106	12	44.7	8.01	2.09	6.95	0.9	4.57	0.85	2.34	0.32	1.93
Leng et al., 2014	Disuga	DSG10-13	Volcanic rocks	99.9154	28.1622			57.55	0.99	15.82	5.86	0.08	2.09	7.33	4.12	2.22	0.33	1.2	97.59	n.g.	n.g.	n.g.	268	60	11.8	18	n.g.	n.g.	n.g.	47.1	2010	17.6	176	13.4	1.43	2470	55	97.4	10.8	38.3	6.55	1.73	5.71	0.71	3.51	0.66	1.83	0.24	1.52
Leng et al., 2014	Disuga	DSG10-15	Volcanic rocks	99.9154	28.1622			48	1.91	17.28	10.14	0.13	6.3	3.8	3.74	3.42	0.47	2.79	97.98	n.g.	n.g.	n.g.	299	40	32.7	27	n.g.	n.g.	n.g.	89.8	1020	28.1	259	21.5	3.15	3730	56.7	112	13.3	49.9	9.55	2.26	8.48	1.14	5.86	1.07	2.87	0.41	2.38
Leng et al., 2014	Disuga	DSG11-27	Volcanic rocks	99.9154	28.1622			59.38	0.58	14.7	4.95	0.11	2.89	4.05	3.67	3.06	0.31	4.45	98.15	n.g.	n.g.	n.g.	117	14.9	32.3	9.8	n.g.	n.g.	n.g.	54.5	691	13.9	141	16.8	1.63	3149	51.2	83.9	9.59	32.8	5.25	1.53	5.3	0.61	2.75	0.56	1.52	0.2	1.38
Leng et al., 2014	Disuga	DSG11-29	Volcanic rocks	99.9154	28.1622			59.77	0.61	14.83	4.72	0.1	2.94	3.73	3.93	2.79	0.32	4.71	98.45	n.g.	n.g.	n.g.	123	20.2	28.1	8.3	n.g.	n.g.	n.g.	53.9	794	12.8	154	16.8	1.81	2179	49.6	82.8	9.48	32.5	5.11	1.42	4.78	0.58	2.48	0.52	1.42	0.19	1.36
Leng et al., 2014	Disuga	DSG11-30	Volcanic rocks	99.9154	28.1622			59.17	0.6	14.83	4.59	0.12	3.43	3.72	3.81	3.03	0.31	4.95	98.56	n.g.	n.g.	n.g.	120	24.4	27.3	9.2	n.g.	n.g.	n.g.	52.2	792	13.6	142	16.1	2.29	2086	51.1	85	9.52	33	5.38	1.51	4.93	0.6	2.68	0.53	1.44	0.2	1.35
Leng et al., 2014	Disuga	DSG11-31	Volcanic rocks	99.9154	28.1622			61	0.59	14.9	4.86	0.09	2.63	3.82	3.28	3.62	0.34	4.47	99.6	n.g.	n.g.	n.g.	115	18.3	28	9.7	n.g.	n.g.	n.g.	67.8	607	14.7	130	11.9	3.42	2198	36.2	61.6	7.15	26.4	4.7	1.46	4.55	0.59	2.78	0.61	1.58	0.22	1.51
Leng et al., 2014	Disuga	DSG11-35	Volcanic rocks	99.9154	28.1622			56.12	0.67	15.62	5.58	0.08	2.25	5.32	3.93	3.25	0.37	5.2	98.39	n.g.	n.g.	n.g.	142	29.4	18.5	15.1	n.g.	n.g.	n.g.	87.3	1329	15.8	155	16.5	4.43	2331	57.3	96.9	11.2	38.3	5.95	1.66	5.68	0.69	3.03	0.6	1.72	0.23	1.5
Leng et al., 2014	Disuga	DSG11-36	Volcanic rocks	99.9154	28.1622			59.12	0.69	15.58	5.82	0.03	1.41	3.68	3.61	3.99	0.36	4.01	98.3	n.g.	n.g.	n.g.	142	52.4	17.4	13.7	n.g.	n.g.	n.g.	106.5	1418	17.2	164	17.1	6.19	3257	64.9	110	12.6	43.6	7.24	2.01	6.71	0.79	3.51	0.73	1.97	0.25	1.72
Leng et al., 2014	Lannitang	LNT10-1	Volcanic rocks	99.7764	28.1133			48.85	1.41	16.92	11.71	0.19	6.47	2.14	3.48	2.86	0.36	3.72	98.11	n.g.	n.g.	n.g.	249	20	36.8	36	n.g.	n.g.	n.g.	58.9	651	22.1	198	18.6	3.25	3330	53.9	99	11.5	41.7	7.23	1.93	6.68	0.87	4.34	0.84	2.46	0.32	2.06
Leng et al., 2014	Lannitang	LNT10-2	Volcanic rocks	99.7764	28.1133			50.65	1.53	18.49	10.62	0.08	5.58	1.89	3.83	1.71	0.33	5.04	99.75	n.g.	n.g.	n.g.	222	20	32	32	n.g.	n.g.	n.g.	50.2	286	21	231	21.7	6.68	905	57.4	107.5	12.1	43	7.22	2.08	6.64	0.85	4.35	0.84	2.45	0.34	1.98
Leng et al., 2014	Lannitang	LNT10-3	Volcanic rocks	99.7764	28.1133			54.57	1.35	16.6	6.41	0.11	2.89	6.01	4.61	1.97	0.27	3.78	98.57	n.g.	n.g.	n.g.	197	20	18.3	22	n.g.	n.g.	n.g.	52.6	1460	20.8	217	19.5	7.51	1400	50.4	94.8	10.5	37.4	6.49	1.92	6.11	0.81	4.31	0.8	2.33	0.32	1.92
Leng et al., 2014	Lannitang	LNT10-4	Volcanic rocks	99.7764	28.1133			51	1.11	14.5	7.66	0.12	4.18	6.36	2.17	2.68	0.28	8	98.06	n.g.	n.g.	n.g.	193	20	23.3	22	n.g.	n.g.	n.g.	80.7	392	18	167	14.9	10.35	1500	42.3	81.8	8.83	31.9	5.63	1.55	5.34	0.7	3.65	0.68	1.98	0.26	1.64
Leng et al., 2014	Xuejiping	X07-19	Volcanic rocks	99.7989	28.0023			54.98	1.32	14.28	7.68	0.12	4.72	4.74	2.47	3.66	0.66	5.86	100.49	n.g.	n.g.	n.g.	230	43.2	19.8	28.7	n.g.	n.g.	n.g.	84.8	1147	17.5	182	16.4	2.69	5128	47.8	85.4	9.97	37.7	7.08	1.82	5.68	0.77	4.13	0.78	1.93	0.27	1.65
Leng et al., 2014	Xuejiping	X07-20	Volcanic rocks	99.7989	28.0023			60.47	1.39	14.92	7.16	0.1	3.24	1.2	3.3	4.48	0.72	2.85	99.83	n.g.	n.g.	n.g.	217	62.9	20.7	34.2	n.g.	n.g.	n.g.	106.1	652	18.3	194	17.5	2.09	6434	48.9	88.5	10	37.8	7.04	1.63	5.61	0.77	4.07	0.74	1.86	0.26	1.62
Leng et al., 2014	Xuejiping	XJP06-33	Volcanic rocks	99.7989	28.0023			56.42	1.28	13.48	6.75	0.11	2.8	5.39	2.08	4.77	0.65	5.77	99.5	n.g.	n.g.	n.g.	152	210	20.5	150.7	n.g.	n.g.	n.g.	122.8	1564	17.8	161	15.3	3.87	3143	47.3	86.7	10	38.7	7.06	1.84	6.02	0.73	3.86	0.7	1.9	0.25	1.55
Leng et al., 2014	Xuejiping	XJP06-34	Volcanic rocks	99.7989	28.0023			57.55	1.26	13.11	7.39	0.11	2.55	5.34	2.1	4.12	0.63	5.36	99.52	n.g.	n.g.	n.g.	154	252.8	19.8	178.2	n.g.	n.g.	n.g.	108.6	1043	17.2	156	14.8	3.54	2536	46	82.6	9.7	37.4	6.84	1.83	5.63	0.69	3.7	0.66	1.8	0.24	1.5
Leng et al., 2014	Xuejiping	XJP11-29	Volcanic rocks	99.7989	28.0023			56.19	1.26	15.41	7.23	0.13	4.06	3.76	4.13	2.89	0.42	2.68	98.16	n.g.	n.g.	n.g.	192	30.2	31.8	19.6	n.g.	n.g.	n.g.	63.8	1272	16.2	176	18	1.27	2574	46.4	80.6	9.23	34	5.98	1.86	5.81	0.72	3.38	0.68	1.78	0.24	1.5
Leng et al., 2014	Xuejiping	XJP11-30	Volcanic rocks	99.7989	28.0023			54.64	1.25	14.8	6.91	0.1	4.13	5.22	3.55	1.47	0.4	5.78	98.25	n.g.	n.g.	n.g.	188	27	23.7	17.3	n.g.	n.g.	n.g.	60.6	1211	16.3	156	17.2	3.34	1381	46.1	78.1	9.09	33.3	5.96	1.85	5.56	0.74	3.42	0.67	1.76	0.23	1.49
Leng et al., 2014	Xuejiping	XJP11-31	Volcanic rocks	99.7989	28.0023			56.8	1.29	15.53	6.82	0.12	4.15	2.79	3.95	2.74	0.43	3.51	98.13	n.g.	n.g.	n.g.	198	30.9	30.4	19.9	n.g.	n.g.	n.g.	61.8	1112	16.8	168	18.3	1.54	2455	50.2	81.5	9.68	35.1	6.29	1.99	6.05	0.77	3.47	0.69	1.86	0.25	1.63
Leng et al., 2014	Hongshan	HN11-1	Volcanic rocks	99.8667	28.1233			57.29	1.12	15.62	6.11	0.08	2.59	3.98	4.48	2.93	0.46	3.75	98.41	n.g.	n.g.	n.g.	150	10.6	28.2	10.3	n.g.	n.g.	n.g.	78.1	1211	19.3	206	21.9	4.18	2028	51.4	87.4	10.1	36.6	6.19	1.96	5.92	0.79	3.73	0.79	2.06	0.28	1.8
Leng et al., 2014	Hongshan	HN11-2	Volcanic rocks	99.8667	28.1233			56.18	1.18	15.12	6.12	0.08	2.94	4.66	4.08	2.85	0.45	5.04	98.7	n.g.	n.g.	n.g.	150	29.8	25.7	13.9	n.g.	n.g.	n.g.	92.4	1578	19.5	212	23.8	8.06	1992	51.6	88.4	10.4	37.4	6.56	1.99	6.19	0.81	3.91	0.78	2.03	0.27	1.76
Leng et al., 2014	Hongshan	HN11-5	Volcanic rocks	99.8667	28.1233	219.1	3.2	57.75	1.06	15.24	5.9	0.1	2.88	3.74	5.32	3.05	0.43	3.13	98.6	n.g.	n.g.	n.g.	141	10.8	34.2	10	n.g.	n.g.	n.g.	98.7	1084	19.3	202	22.8	8.2	1699	53.4	91.2	10.6	38.2	6.61	1.9	6.2	0.83	3.8	0.77	2	0.29	1.73
Leng et al., 2014	Hongshan	HN11-6	Volcanic rocks	99.8667	28.1233			59.09	0.98	14.98	5.54	0.1	2.62	3.55	5.03	3.2	0.39	3.07	98.55	n.g.	n.g.	n.g.	134	10.1	29	9.9	n.g.	n.g.	n.g.	104.3	1135	18	204	21.6	6.11	2109	51.2	84.9	10.1	35.6	6	1.75	5.73	0.76	3.59	0.73	1.94	0.26	1.61
Leng et al., 2014	Hongshan	HN11-7	Volcanic rocks	99.8667	28.1233			56.22	1.07	15.28	5.86	0.09	2.69	4.47	3.73	3.35	0.44	4.96	98.16	n.g.	n.g.	n.g.	141	9.1	21.8	9.8	n.g.	n.g.	n.g.	94.7	1238	19.1	208	22.5	4.04	2426	51.5	87.8	10	36.3	6.12	1.9	5.97	0.79	3.78	0.8	2.01	0.27	1.73
Leng et al., 2014	Hongshan	HN118	Volcanic rocks	99.8667	28.1233			57.59	1.09	15.64	6.14	0.08	2.86	3.44	4.7	3.3	0.45	2.69	97.98	n.g.	n.g.	n.g.	150	10.2	36.5	10.8	n.g.	n.g.	n.g.	98.5	1261	19.6	210	23.6	3.16	2317	53.2	90.3	10.6	38.1	6.66	1.92	6.57	0.82	3.91	0.8	2.09	0.28	1.77
Leng et al., 2018	Pulang pluton	PLZK6602-273.5	Monzodiorite	n.g.	n.g.			59.8	0.69	14.45	7.41	0.03	3.67	2.54	2.84	5.48	0.41	1.84	99.16	12.2	3.43	19	150	69.2	8.3	27.9	100.2	42.1	16.1	234	690	17.2	141	12.2	32.5	1980	39.1	73.8	8.41	30.9	5.52	1.72	4.71	0.72	3.21	0.61	1.68	0.23	1.42
Leng et al., 2018	Pulang pluton	PLZK6628-504.8	Monzodiorite	n.g.	n.g.			63.5	0.58	13.9	4.87	0.07	2.56	4.07	2.69	5.08	0.41	0.73	98.46	9.58	5.07	15.3	116	52.7	10.3	16.5	31.9	42.1	15.6	153	772	16.2	123	13.4	8.29	1440	33.4	64.2	7.45	27.8	4.88	1.36	4.08	0.62	2.98	0.57	1.61	0.23	1.45
Leng et al., 2018	Pulang pluton	PL302-5	Quartz monzonite	99.9876	28.0377			68.4	0.51	12.4	4.37	0.01	1.92	1.02	2.26	5.65	0.32	0.96	97.82	7.07	3.32	22.1	165	71.3	17	28.2	18.7	54	16.2	123	834	17.8	141	12.3	3.65	1970	34.8	73.4	8.01	30	5.87	1.55	5.03	0.72	3.34	0.65	1.75	0.25	1.49
Leng et al., 2018	Pulang pluton	PLZK0406-132.2	Quartz monzonite	99.9899	28.0406	217.1	1.8	64.5	0.53	16.2	3.91	0.07	1.92	3.73	4.31	3.28	0.21	0.41	99.07	8.25	3.01	10.2	81.6	22.8	8.94	13.3	35.5	53.4	18.8	89.2	1210	13.1	218	13.1	3.39	1240	39.5	73.6	8.1	28.2	4.6	1.16	3.21	0.52	2.19	0.48	1.3	0.19	1.24
Leng et al., 2018	Pulang pluton	PLZK0406-747	Quartz monzonite	99.9899	28.0406			65.4	0.51	15.25	3.93	0.02	1.94	3.56	3.89	3.64	0.25	0.53	98.92	12.4	2.92	11.2	87.9	29.6	6.85	35.1	15.9	84	17.2	100	972	13.4	169	10.4	3.25	1110	38.6	69.7	7.48	26.3	4.32	1.08	3.21	0.51	2.48	0.49	1.38	0.2	1.27
Leng et al., 2018	Pulang pluton	PLZK0409-515	Quartz monzonite	99.9899	28.0406			66.3	0.49	13.9	4.24	0.04	2.04	2.62	2.96	5.19	0.34	0.6	98.72	11.1	4.71	13.6	97.3	40.9	9.18	13.6	376.7	47.1	16.1	152	655	16.3	147	13.4	5.68	1200	27.8	55.5	6.36	23.6	4.74	1.15	3.58	0.6	2.94	0.58	1.65	0.25	1.51
Leng et al., 2018	Pulang pluton	PLZK1208-1075	Quartz monzonite	99.9899	28.0406			65.3	0.54	13.65	4.25	0.05	2.28	3.52	3.43	4.5	0.36	0.91	98.79	10.9	5.67	13.8	104	49.6	10.9	14.5	478.5	38.7	15.2	150	644	14.9	135	13.6	5.87	946	30.7	59.1	6.77	25.1	4.64	1.12	3.71	0.58	2.74	0.53	1.47	0.22	1.35
Leng et al., 2018	Pulang pluton	PLZK5620-58	Quartz diorite	n.g.	n.g.			63.9	0.82	15.1	4.07	0.03	2.97	4.25	3.82	2.26	0.2	1.36	98.78	7.22	2.25	13.8	116	44.9	8.12	31.3	56.8	26.5	18.6	66.8	1340	12	172	14.9	2.24	1410	24.7	52.8	6.34	24	4.12	1.49	3.28	0.51	2.36	0.46	1.22	0.17	1.05
Leng et al., 2018	Pulang pluton	PLZKE002-3.5	Quartz diorite	n.g.	n.g.			60.3	0.7	14.4	6.81	0.06	3.59	3.42	3.25	4.74	0.39	1.23	98.89	12.2	3.12	19.7	154	62.3	15.8	24.8	105.3	40.2	16.6	199	782	17.4	157	11.8	23.2	1820	32.3	67.1	7.92	29.5	5.46	1.57	4.44	0.67	3.17	0.6	1.75	0.23	1.48
Leng et al., 2018	Pulang pluton	PLZKE004-373.4	Quartz diorite	n.g.	n.g.			59.8	0.7	14.4	5.93	0.05	3.52	3.35	2.95	5.45	0.4	1.04	97.59	13.2	2.77	18.5	151	58.1	8.45	23.1	99.3	48.9	17.2	184	762	17.2	138	12.2	15.6	3320	38.7	72.3	8.33	31.7	5.57	1.45	4.65	0.7	3.19	0.64	1.67	0.23	1.43
Leng et al., 2018	Pulang pluton	PLZKE004-69	Quartz diorite	n.g.	n.g.			59.1	0.61	13.8	4.6	0.07	4.7	5.38	2.96	5.34	0.71	1.31	98.58	13	3.97	10.5	82.5	139	14.3	114	18.6	44.6	20.6	147	1860	19.4	316	13.6	7.99	4130	299	616	43.5	159	22.9	4.56	12.57	1.56	4.51	0.72	2.05	0.21	1.27
Leng et al., 2018	Pulang pluton	PL12-13	Quartz diorite	99.9949	28.0444			60.8	0.71	14.5	5.63	0.08	3.48	4.78	2.94	4.5	0.4	0.73	98.55	10.5	2.99	21	162	62.7	15.4	24.2	72.3	56	16.5	146	820	17.6	153	12.1	17	1940	43	78.9	9.04	33.8	6.04	1.64	5.32	0.74	3.39	0.63	1.75	0.24	1.48
Leng et al., 2018	Pulang pluton	PL12-14	Quartz diorite	99.9949	28.0444			60.7	0.72	14.55	6.22	0.08	3.48	4.86	2.98	4.19	0.41	0.69	98.88	11.7	3.8	20.7	161	67.2	15.6	25.9	15.4	46.2	15.9	135	824	17.2	159	12	14.6	1820	39.7	73.5	8.56	31.4	5.9	1.47	5.03	0.7	3.19	0.61	1.68	0.24	1.46
Leng et al., 2018	Pulang pluton	PL12-22	Quartz diorite	99.9949	28.0444			62.1	0.71	14.65	3.88	0.06	3.94	4.61	3.65	3.27	0.4	1.3	98.57	15.1	5.29	29.2	181	89.7	12.4	28.5	74.6	186.8	16	129	949	17.5	166	10.8	5.41	1810	40.8	77	7.76	28.8	5.29	1.21	3.98	0.66	2.91	0.65	1.64	0.24	1.58
Leng et al., 2018	Pulang pluton	PL12-23	Quartz diorite	99.9949	28.0444			63.5	0.61	14.45	5.01	0.06	2.65	3.84	3.48	4.32	0.42	1.33	99.67	4.86	4.86	18	129	54.1	12.5	18.9	28.3	48.3	15.5	114	823	17.4	155	14.4	3.67	1290	34.7	66.6	7.73	29	5.49	1.36	4.44	0.67	3.13	0.62	1.68	0.26	1.57
Leng et al., 2018	Pulang pluton	PL12-6	Quartz diorite	99.9987	28.0488	216.8	1.4	64.5	0.49	15	4.26	0.03	2.19	2.6	3.38	5	0.28	0.8	98.53	7.53	4.41	11.7	86.2	36.4	8.28	16.1	130.1	40.5	17.6	164	992	14.7	163	11.2	8.23	1950	33.4	64.8	7.24	26.4	4.52	1.12	3.42	0.58	2.71	0.55	1.51	0.23	1.47
Leng et al., 2018	Pulang pluton	PL12-8	Quartz diorite	99.9999	28.0476			65.4	0.51	15.1	3.96	0.04	2.19	3.24	3.69	4.43	0.29	0.76	99.61	6.28	4.14	11.3	86.2	31.7	7.96	14.3	58.5	33.8	16.9	130	924	14.4	151	11.3	4.78	1530	32.8	63	7.03	26.4	4.66	1.17	3.51	0.58	2.66	0.53	1.49	0.22	1.43
Leng et al., 2018	Pulang pluton	PL12-9	Quartz diorite	99.9999	28.0476	216.9	2	60.7	0.68	14.65	6.13	0.07	3.46	3.67	3.27	4.8	0.39	0.96	98.78	9.3	2.86	18.7	144	62	9.63	28.2	68.7	68.8	16.8	180	867	17.8	151	12.5	16.7	3050	42.1	77.6	8.96	32.9	6.39	1.58	4.87	0.75	3.39	0.65	1.71	0.25	1.55
Leng et al., 2018	Pulang pluton	PLZK2812-494.6	Quartz diorite	n.g.	n.g.			62.3	0.53	14.7	4.42	0.04	3.22	3.94	3.77	4.25	0.4	0.62	98.19	11	2.95	11.1	83.3	75.5	11.9	54.6	102.7	36.6	18.9	128	1410	14.4	235	11.1	5.24	1770	83.4	249	18.9	68.7	9.65	2.07	5.63	0.79	2.88	0.53	1.55	0.19	1.19
Leng et al., 2018	Pulang pluton	PLZK2812-579	Quartz diorite	n.g.	n.g.			63.7	0.69	15.15	2.35	0.04	3.55	4.86	5.93	0.57	0.44	1.7	98.98	8.31	3.75	19.1	149	60.5	5.05	13.4	38.6	45.9	18.1	33.5	831	20.3	138	11.5	1.89	159	15.4	43.8	6.42	27.9	6.16	1.53	5.2	0.86	3.94	0.79	2.18	0.3	1.82
Leng et al., 2018	Pulang pluton	PLZK5620-175	Quartz diorite	n.g.	n.g.			64.2	0.5	15.25	4.57	0.02	2.25	3.08	2.96	3.66	0.31	2.09	98.89	14.9	4.47	11.6	95.2	31.5	9.16	18.8	78.7	23.3	17.6	103	898	15	163	12.5	3.38	1160	69.1	121	13.4	45	6.65	1.63	4.72	0.7	3	0.57	1.59	0.21	1.32
Leng et al., 2018	Pulang pluton	PL12-1	Andesite	99.9643	28.048	212.3	1.3	64.8	0.46	15.7	3.43	0.07	1.68	3.44	4.34	2.92	0.2	1.95	98.99	30.3	3.68	9.27	72.7	26.8	7.24	11.9	11.5	53.7	17.6	66.8	1030	12.6	170	12.8	3.57	1180	36.6	68.2	7.35	25.4	3.99	1.01	3.01	0.49	2.2	0.43	1.25	0.2	1.21
Leng et al., 2018	Pulang pluton	PL12-2	Andesite	99.9643	28.048			55.4	1.06	14.65	8.33	0.08	4.87	2.27	2.91	6.36	0.68	1.95	98.56	18	3.36	28.9	220	85.6	14.7	33.8	53.6	62.2	18.6	256	561	23.3	216	15.4	21.5	4580	42.1	83.7	10.1	39.3	8.05	1.56	6.9	1.02	4.67	0.87	2.25	0.3	1.9
Leng et al., 2018	Pulang pluton	PL12-3	Andesite	99.9643	28.048			57.6	0.98	13.95	6.33	0.07	4.67	3.28	2.78	6.54	0.62	2.15	98.97	12.5	1.94	23	183	68.3	8.47	21.8	44.2	55.6	17	268	570	22.7	203	14.1	25.3	4490	51.7	95.2	11.4	43.4	8.24	1.57	6.62	1.07	4.59	0.86	2.27	0.32	1.98
Leng et al., 2018	Pulang pluton	PL12-10	Andesite	99.9999	28.0476			60.2	0.74	12.85	6.35	0.03	4.9	1.05	0.23	9.64	0.75	1.31	98.05	24.9	2.27	8.41	84.4	177	13.8	150	245.7	39.1	20.1	302	1000	15.8	394	9.5	23.9	8680	110	373	30.2	115	17.8	3.44	10.43	1.21	3.61	0.55	1.61	0.17	1.05
Leng et al., 2018	Pulang pluton	PLZK0416-786.8	Granodiorite	n.g.	n.g.			64.5	0.5	15.1	4.12	0.06	2.35	4.11	3.97	3.39	0.27	0.67	99.04	5.49	2.5	11.6	78.6	39.1	9.46	23.1	7.8	39.5	15.8	86.3	915	13.1	139	10.7	3.08	1000	29.4	57.2	6.61	24.5	4.34	1.08	3.17	0.51	2.43	0.49	1.31	0.19	1.22
Leng et al., 2018	Pulang pluton	PLZK0416-821	Granodiorite	n.g.	n.g.			63.8	0.5	14.75	3.84	0.05	2.22	4.05	3.79	3.77	0.31	1.07	98.15	8.17	4.15	11.5	86.3	40.7	8.42	24.9	17	40	17.6	90.5	1240	13.9	152	10.9	2.84	1400	46.8	87	10.1	36.6	5.94	1.5	3.76	0.59	2.55	0.52	1.43	0.19	1.27
Leng et al., 2018	Pulang pluton	PLZK0416-835	Granodiorite	n.g.	n.g.			64.9	0.49	15.3	4.3	0.03	2.05	3.61	4.12	3.57	0.27	0.73	99.37	10.4	3.45	11.9	87.8	32.2	10.8	15.7	79	37.9	17.7	108	969	13.7	160	10.6	3.3	938	35.6	65.4	7.24	26.4	4.58	1.16	3.17	0.53	2.52	0.49	1.4	0.2	1.28
Leng et al., 2018	Pulang pluton	PLZK5620-125	Granodiorite	n.g.	n.g.			64.7	0.5	15.15	4.14	0.02	2.27	2.83	3.68	3.82	0.31	1.24	98.66	14.6	5.02	12	92.1	35.5	11.9	17.6	129.3	32	17.3	109	870	13.1	150	12.1	4.73	1200	33.9	67.5	7.89	28.6	4.73	1.22	3.53	0.54	2.48	0.46	1.31	0.19	1.21
Leng et al., 2018	Pulang pluton	PLZK5620-236.8	Granodiorite	n.g.	n.g.			64.9	0.46	14.7	4.08	0.03	2	3.55	2.94	4.1	0.27	1.67	98.7	7.96	4.05	11.1	85.7	29.9	7.37	14.2	184.1	27.2	16.9	98	816	13.9	161	11.5	2.88	1350	30.9	58.6	6.62	24.3	4.46	1.17	3.41	0.53	2.45	0.49	1.4	0.21	1.27
Leng et al., 2018	Pulang pluton	PLZK5620-294.7	Granodiorite	n.g.	n.g.			65.8	0.52	15.05	4.51	0.02	2.27	2.76	3.59	3.8	0.31	0.83	99.46	12.6	3.6	12	94.3	34.4	8.96	17.1	343.3	28.1	16.8	106	864	12.6	140	11.2	4.04	1180	23.3	44.1	4.93	18.7	3.36	0.93	2.82	0.46	2.2	0.45	1.24	0.18	1.15
Leng et al., 2018	Pulang pluton	PLZK5620-91	Granodiorite	n.g.	n.g.			65.6	0.51	15.15	2.85	0.04	2.24	4.05	3.69	3.81	0.31	0.75	99	3.46	4.02	11.9	92.3	34.9	5.78	15	24.5	34.4	16.6	86	906	14.3	152	13	1.67	1170	31.9	60.6	6.76	24.8	4.54	1.25	3.31	0.56	2.53	0.52	1.44	0.2	1.29
Leng et al., 2018	Pulang pluton	PLZKE004-135.3	Granodiorite	n.g.	n.g.			64.1	0.51	15.15	3.7	0.04	2.46	3.86	3.79	4.01	0.25	0.89	98.76	11.6	3.09	11.5	84.4	42.4	6.88	27.8	6.16	49.6	17.4	119	1290	13.4	203	10.8	8.41	1450	47.7	89	9.84	35.2	5.1	1.29	3.66	0.57	2.45	0.5	1.37	0.18	1.21
Leng et al., 2018	Pulang pluton	PLZKE004-283	Granodiorite	n.g.	n.g.			65.2	0.5	15.05	3.85	0.05	2.13	3.34	3.71	4.33	0.28	0.7	99.14	6.78	4.25	11.9	90.6	31.4	9.28	15.4	18.9	42.7	16.7	116	911	13.9	163	11.1	4.99	1260	29.9	57.7	6.55	24.7	4.22	1.2	3.31	0.53	2.5	0.49	1.38	0.2	1.25
Leng et al., 2018	Pulang pluton	PLZKE004-46	Granodiorite	n.g.	n.g.			64.7	0.51	15.15	4.09	0.03	1.96	3.35	3.63	4.07	0.28	0.79	98.56	12	3.82	11.4	85.8	30.4	7.11	14	20.9	46.1	16.7	128	933	14.1	185	11.6	8.41	1280	35.9	67.2	7.46	26.5	4.44	1.15	3.37	0.54	2.58	0.51	1.41	0.21	1.3
Leng et al., 2018	Pulang pluton	PLZKE004-62	Granodiorite	n.g.	n.g.			63.9	0.52	15.35	3.98	0.04	2.87	3.77	3.59	4.26	0.32	0.85	99.45	15.7	3.35	11.2	81.2	58.9	11	38.9	5.47	38.8	17.4	116	1360	14.1	240	10.7	7.62	1560	59.2	113	13.9	50.8	7.5	1.77	4.72	0.68	2.74	0.51	1.44	0.19	1.21
Cao et al., 2016	Pulang pluton	6628-588	Granite	99.9889	28.0639	215.5	1.6	63.18	0.63	14.27	5.37	0.06	2.73	4.08	2.6	5.34	0.41	0.84	99.51	n.g.	n.g.	13.8	109	47	7.5	14	n.g.	n.g.	n.g.	178	796	13.8	191	12.4	n.g.	1612	29.3	58.7	7.17	27.2	5.29	1.39	3.97	0.55	3.05	0.58	1.55	0.23	1.48
Cao et al., 2016	Pulang pluton	6628-597	Granite	99.9869	28.0594			64.44	0.57	13.96	4.84	0.06	2.47	3.81	2.82	5.43	0.36	0.73	99.49	n.g.	n.g.	13.1	99	43	8.4	14.6	n.g.	n.g.	n.g.	162	760	15.1	337	12.7	n.g.	1370	32	63.7	7.82	29.1	5.76	1.44	4.25	0.6	3.42	0.66	1.83	0.28	1.76
Cao et al., 2016	Pulang pluton	0406-462	Granite	99.9875	28.0397			65.85	0.49	15.69	3.26	0.05	1.74	3.6	3.92	3.46	0.18	1.25	99.49	n.g.	n.g.	6.9	65	18	7.2	11.4	n.g.	n.g.	n.g.	93	1040	10.7	187	10.9	n.g.	1131	35.6	66.7	7.55	26	4.26	1.11	3.02	0.42	2.41	0.47	1.34	0.19	1.3
Cao et al., 2016	Xuejiping pluton	XJP-3	Granite	99.8103	28.0108			63.7	0.8	14.1	4.37	0.06	2.1	2.25	3.51	2.74	0.23	5.9	99.76	n.g.	n.g.	9.9	119	88	9.4	11.6	n.g.	n.g.	n.g.	80	772	13.8	134	15.5	n.g.	2124	46.2	80.1	8.5	28.6	4.96	1.05	3.62	0.48	2.58	0.48	1.34	0.19	1.29
Cao et al., 2016	Hongshan pluton	HS-01	Granite	99.8908	28.1233	216.4	2.7	58.9	1	15.64	6.49	0.1	3.45	3.15	3.66	5.48	0.32	1.31	99.5	n.g.	n.g.	12.3	109	37	13.3	15.1	n.g.	n.g.	n.g.	271	1004	16.7	200	17.9	n.g.	3920	44.6	85.3	9.5	35.2	6.1	1.1	4.79	0.62	3.56	0.68	1.83	0.26	1.59
Cao et al., 2016	Lannitang pluton	LNTA	Granite	99.7978	28.1158			58.6	1.4	14.9	7.3	0.1	2.7	4.5	4	2.3	0.2	3.5	99.5	n.g.	n.g.	19.2	201	17	17.1	16.8	n.g.	n.g.	n.g.	53	1115	18.7	199	17.9	n.g.	2082	48.8	88.3	9.82	33.8	5.86	1.43	4.61	0.65	3.61	0.68	1.76	0.25	1.61
Cao et al., 2016	Chundu pluton	CD-4	Granite	99.8694	27.9581	214.2	n.g.	59.82	0.85	13.76	4.8	0.2	2.28	4.78	1.86	3.56	0.3	7.76	99.97	n.g.	n.g.	10.8	130	46	8.6	11.8	n.g.	n.g.	n.g.	146	255	14.6	176	17	n.g.	2788	50.3	88.3	9.65	32.6	5.62	1.12	4.18	0.56	2.9	0.53	1.4	0.2	1.26
Jiang et al., 2015	Bengge stocks	BGBH1	Alkali syenite porphyry	99.8539	27.6821			53.81	0.76	11.33	8.094	0.14	5.25	5.71	1.04	9.55	1.28	2.05	99.014	n.g.	n.g.	35.6	238	88.5	24.2	21.4	128	73.5	14	249	1787	12.8	155	7.1	n.g.	7595	50.7	93.6	11	44	7.95	1.54	6.76	0.75	3.26	0.52	1.35	0.17	0.97
Jiang et al., 2015	Bengge stocks	BGH29	Alkali syenite porphyry	99.8539	27.6821	213.8	2.2	54.68	1.13	12.08	8.90412	0.14	5.35	6.19	2.08	7.53	1.17	1.04	100.294	n.g.	n.g.	33.7	239	106	27.6	32.6	45.5	81.5	15.1	223	1087	16.9	227	16.8	n.g.	3362	33.2	66	8.25	34.5	6.83	1.65	6.13	0.78	3.9	0.66	1.8	0.24	1.51
Jiang et al., 2015	Bengge stocks	SGB16-H1	Alkali syenite porphyry	99.8539	27.6821			57.02	0.86	12.05	6.81212	0.15	3.45	4.92	2.36	6.61	0.77	4.13	99.1321	n.g.	n.g.	23.5	184	55.5	18.4	21.7	104	86.3	15.8	213	1432	18.9	250	19.4	n.g.	4432	45.5	81.3	9.3	36.1	7.06	1.56	6.5	0.78	4.26	0.73	2.01	0.28	1.74
Jiang et al., 2015	Bengge stocks	SGB16-H2	Alkali syenite porphyry	99.8539	27.6821			56.74	0.86	11.9	7.03326	0.16	3.78	5.08	2.3	6.6	0.81	4.1	99.3633	n.g.	n.g.	23.8	180	68.7	16.4	20.3	67.1	89.1	15.6	233	1518	20.6	237	20.3	n.g.	4503	49.5	89.3	10.4	40	7.91	1.67	7.04	0.9	4.63	0.8	2.11	0.31	1.86
Jiang et al., 2015	Bengge stocks	BGH2	Alkali syenite porphyry	99.8539	27.6821	219.1	4.7	55.43	0.82	10.75	10.2735	0.13	4.73	3.4	0.5	7.73	1.16	4	98.9235	n.g.	n.g.	30.1	213	90.4	68.4	22.1	105	120	17.9	256	717	14.9	220	17.5	n.g.	5418	83.2	123	12.6	45	7.57	1.27	6.26	0.7	3.18	0.59	1.7	0.24	1.46
Jiang et al., 2015	Bengge stocks	BGBH3	Alkali syenite porphyry	99.8539	27.6821			56.94	0.82	12.16	6.91534	0.15	4.32	5.76	2.5	6.57	0.95	2.64	99.7253	n.g.	n.g.	27	205	66.6	20.6	24.3	27	67.9	15.8	164	1133	18.6	221	23.2	n.g.	4777	57.6	103	11.8	45.8	8.55	1.71	7.79	0.88	4.27	0.72	2.09	0.28	1.72
Jiang et al., 2015	Bengge stocks	SGB4-H1	Alkali syenite porphyry	99.8539	27.6821			61.22	0.48	13.88	4.15354	0.065	1.25	2.17	0.2	10.97	0.2	5.12	99.7085	n.g.	n.g.	12.6	124	11	6.52	4.65	43.3	31.7	15.1	224	790	11.4	189	18.7	n.g.	5787	39	66	6.73	25.5	4.77	0.78	4	0.5	2.63	0.43	1.27	0.19	1.17
Jiang et al., 2015	Bengge stocks	SGB4-H2	Alkali syenite porphyry	99.8539	27.6821			60.95	0.49	13.82	4.2281	0.08	1.4	1.93	0.2	10.72	0.23	5.18	99.2281	n.g.	n.g.	12.1	130	11.9	6.63	4.59	95.7	47.2	15.2	228	738	13.5	126	19.6	n.g.	6148	44.8	77.7	8.16	28.9	5.15	0.86	4.61	0.58	3.13	0.49	1.39	0.22	1.25
Jiang et al., 2015	Bengge stocks	BGH25	Alkali syenite porphyry	99.8539	27.6821			66.35	0.37	13.95	2.7302	0.032	0.57	1	0.082	11.6	0.14	2.69	99.5142	n.g.	n.g.	5.49	77.8	9.21	3.5	3.07	98.8	33.3	15	245	346	10.2	283	24.5	n.g.	4477	27.2	45	4.8	17.5	3.24	0.57	2.75	0.41	2.15	0.38	1.16	0.17	1.16
Jiang et al., 2015	Bengge stocks	SGB4-B6	Alkali syenite porphyry	99.8539	27.6821			61.37	0.43	13.36	4.31953	0.091	1.5	2.24	0.098	10.1	0.24	5.32	99.0685	n.g.	n.g.	12.6	100	20.1	6.67	9.26	53.8	34.6	12.9	236	729	12.1	143	19.9	n.g.	5289	39.8	65.4	7.19	26.5	5.02	0.91	4.72	0.55	2.93	0.47	1.26	0.17	1.09
Peng et al., 2014	Xuejiping pluton	SJ-164	Dioritic porphyry	99.8124	28.0074			62.98	0.79	15.56	4.6	0.02	2.57	2.43	3.6	2.5	0.3	4.21	99.56	n.g.	n.g.	11.9	118	24.7	9.34	14.8	n.g.	n.g.	n.g.	54.9	329	13.7	148	15.9	n.g.	1780	41.9	78.3	8.29	29.6	5.08	1.5	4.14	0.58	2.76	0.56	1.53	0.23	1.39
&	Xuejiping pluton	SJ-166	Dioritic porphyry	99.8124	28.0074			63.42	0.78	15.72	4.69	0.02	2.65	1.92	2.9	2.97	0.3	4.24	99.61	n.g.	n.g.	11.8	123	23.7	6.29	14.3	n.g.	n.g.	n.g.	66.6	272	12.8	146	16.1	n.g.	1130	44.6	81	8.31	29.5	5.03	1.32	3.95	0.57	2.64	0.56	1.49	0.21	1.39
Fang, 2017	Xuejiping pluton	SJ-171	Dioritic porphyry	99.8124	28.0074	216.9	1.4	61.82	0.97	14.97	6.28	0.02	3.48	1.55	3.94	2.67	0.42	3.43	99.55	n.g.	n.g.	14.1	159	24.5	16.6	18.2	n.g.	n.g.	n.g.	67.2	830	12.1	147	16	n.g.	1310	39.8	71.9	7.27	26.1	4.52	1.34	3.87	0.52	2.4	0.49	1.33	0.17	1.18
same	Xuejiping pluton	SJ-284	Dioritic porphyry	99.8124	28.0074			51.68	1.05	16.65	4.84	0.19	2.41	5.79	2.15	4.13	0.26	10.2	99.35	n.g.	n.g.	12.3	159	11.6	15	13.9	n.g.	n.g.	n.g.	135	586	17.8	221	22.6	n.g.	2010	58.7	100	10.6	37	6.04	1.55	5.39	0.74	3.53	0.72	1.93	0.25	1.78
same	Xuejiping pluton	SJ-286	Dioritic porphyry	99.8124	28.0074			57.41	0.66	15.42	5.15	0.09	2.35	4.99	3.65	2.33	0.31	7.58	99.94	n.g.	n.g.	12.4	140	9.71	12.2	7.97	n.g.	n.g.	n.g.	76.9	878	14.2	151	15.5	n.g.	1920	63.6	103	10.5	35.3	5.4	1.46	4.52	0.56	2.5	0.51	1.5	0.19	1.36
same	Xuejiping pluton	SJ-287	Dioritic porphyry	99.8124	28.0074			49.65	1.1	15.29	6.96	0.15	3.15	6.47	2.55	2.95	0.3	10.86	99.43	n.g.	n.g.	17.1	201	17.3	17.5	19.5	n.g.	n.g.	n.g.	98.2	713	16.9	205	18.1	n.g.	1400	54.8	95.8	10.3	36.1	5.91	1.8	5.16	0.68	3.21	0.65	1.75	0.23	1.51
same	Xuejiping pluton	SJ-288	Dioritic porphyry	99.8124	28.0074			52.11	1.02	14.21	7.06	0.16	3.16	6.6	2.54	2.73	0.28	10.49	100.36	n.g.	n.g.	16.4	179	14	19.3	18.6	n.g.	n.g.	n.g.	89.8	714	16	186	16.5	n.g.	1230	50.9	89.1	9.52	33.5	5.54	1.6	4.75	0.66	3.03	0.62	1.68	0.21	1.41
same	Xuejiping pluton	SJ-289	Dioritic porphyry	99.8124	28.0074			52.26	1.06	12.43	7.25	0.13	3.59	6.46	2.36	2.27	0.26	11.52	99.59	n.g.	n.g.	15.5	175	19.7	18.8	18.4	n.g.	n.g.	n.g.	65.9	288	15.8	162	16.9	n.g.	1240	41.4	74.7	8.11	29.3	5.06	1.54	4.49	0.63	2.95	0.63	1.65	0.22	1.43
same	Xuejiping pluton	SJ-177	Dioritic porphyry	99.8029	28.018	216.3	3.4	59.44	0.94	15.79	6.04	0.09	2.43	2.96	5.61	2.36	0.37	3.43	99.46	n.g.	n.g.	14	131	15.1	13.8	12.7	n.g.	n.g.	n.g.	57.3	675	17.7	199	22.2	n.g.	2290	60	108	11.3	40	6.78	1.79	5.42	0.75	3.56	0.73	2.02	0.27	1.74
same	Xuejiping pluton	SJ-178	Dioritic porphyry	99.8029	28.018			59.51	0.91	15.96	6.16	0.09	2.49	2.61	5.61	2.6	0.37	3.22	99.53	n.g.	n.g.	14	125	15.3	13.1	12.5	n.g.	n.g.	n.g.	67.6	659	17.2	203	22.4	n.g.	2820	46	83.9	8.95	32.4	5.66	1.69	4.71	0.69	3.27	0.68	1.87	0.26	1.71
same	Xuejiping pluton	SJ-180	Dioritic porphyry	99.8029	28.018			59.03	0.89	15.63	6.22	0.1	2.4	3.16	5.42	2.58	0.36	3.75	99.54	n.g.	n.g.	13.5	127	15.7	18.4	13.8	n.g.	n.g.	n.g.	65.4	553	15.9	192	21.2	n.g.	2370	58.4	101	10.2	35	5.55	1.91	4.73	0.65	3.1	0.67	1.87	0.24	1.66
same	Xuejiping pluton	SJ-181	Dioritic porphyry	99.8029	28.018			57.21	1.32	14.83	7.59	0.13	3.74	5.58	3.63	3.41	0.45	1.52	99.41	n.g.	n.g.	18.6	197	34.8	19.1	27.4	n.g.	n.g.	n.g.	92.4	1540	16.9	180	16.3	n.g.	2350	49.3	89.4	9.46	35.4	6.52	2	6.02	0.8	3.75	0.77	2.04	0.26	1.72
same	Xuejiping pluton	SJ-186	Dioritic porphyry	99.796	28.0178	216.8	0.9	54.78	1.29	14.5	7.43	0.11	3.68	5.59	3.67	1.52	0.43	6.87	99.87	n.g.	n.g.	18.7	194	32.5	19.1	25.5	n.g.	n.g.	n.g.	55.9	1530	16.1	164	15.6	n.g.	1550	46.7	85.9	9.13	34.9	6.23	1.9	5.55	0.77	3.55	0.73	1.85	0.25	1.55
same	Xuejiping pluton	SJ-187	Dioritic porphyry	99.796	28.0178			54.2	1.29	14.45	7.54	0.11	3.74	5.84	3.63	1.55	0.43	7.08	99.86	n.g.	n.g.	19.4	194	36.4	20.1	26.9	n.g.	n.g.	n.g.	56.3	1610	16.5	162	15.7	n.g.	1560	47.8	87.4	9.31	35.3	6.31	1.92	5.65	0.79	3.58	0.72	1.91	0.24	1.56
same	Xuejiping pluton	SJ-188	Dioritic porphyry	99.796	28.0178			54.13	1.29	13.96	7.29	0.11	3.57	6.2	3.49	1.54	0.42	7.94	99.94	n.g.	n.g.	17.4	185	35.7	19.5	27.1	n.g.	n.g.	n.g.	57.1	1550	16	159	15.3	n.g.	1530	46.8	84.6	9.02	34	6.02	1.86	5.28	0.76	3.52	0.72	1.87	0.25	1.6
same	Xuejiping pluton	SJ-189	Dioritic porphyry	99.796	28.0178			53.99	1.32	12.81	6.34	0.12	4.27	6.05	3.83	1.57	0.68	9.06	100.04	n.g.	n.g.	22	193	38.4	23.1	40.4	n.g.	n.g.	n.g.	34.7	1300	18	172	16.7	n.g.	1880	48	90.4	9.71	38	7.03	1.98	6.08	0.82	3.76	0.76	1.98	0.26	1.67
Kong et al., 2016	Pulang pluton	12PL5618-270	Granodiorite	99.9835	28.038	216.1	1.4	65.09	0.52	15.91	3.43	0.05	1.91	3.74	4.03	3.39	0.2	1.23	99.5	n.g.	n.g.	n.g.	n.g.	21.53	7.58	13.68	n.g.	n.g.	n.g.	94	1105.08	10.73	189.25	10.75	n.g.	1204.33	34.68	n.g.	n.g.	n.g.	4.3	n.g.	3.07	n.g.	n.g.	n.g.	n.g.	n.g.	1.27
Kong et al., 2016	Pulang pluton	12PL0713-713	Monzonite	99.9835	28.038	215	1.3	65.42	0.53	14.2	3.93	0.05	2.27	3.61	3.41	4.5	0.34	1.25	99.51	n.g.	n.g.	n.g.	n.g.	37.6	10.1	12.9	n.g.	n.g.	n.g.	159	743	12.3	174	11.8	n.g.	1158	30.9	n.g.	n.g.	n.g.	4.8	n.g.	3.44	n.g.	n.g.	n.g.	n.g.	n.g.	1.42
Kong et al., 2016	Pulang pluton	12PL6628-588	Quartz diorite	99.9835	28.038	218.9	1.4	63.18	0.63	14.27	5.37	0.06	2.73	4.08	2.6	5.34	0.41	0.84	99.51	n.g.	n.g.	n.g.	n.g.	47.2	7.5	14	n.g.	n.g.	n.g.	178	796	13.8	191	12.4	n.g.	1612	29.3	n.g.	n.g.	n.g.	5.29	n.g.	3.97	n.g.	n.g.	n.g.	n.g.	n.g.	1.48
Kong et al., 2016	Pulang pluton	12PLE302-118	Diorite	99.9835	28.038	217.9	1.8	61.05	0.72	14.74	5.62	0.07	3.56	5.25	3.06	4.31	0.38	0.73	99.49	n.g.	n.g.	n.g.	n.g.	60.2	14.8	21.9	n.g.	n.g.	n.g.	150	878	13.9	173	10.1	n.g.	2034	37.9	n.g.	n.g.	n.g.	5.96	n.g.	4.37	n.g.	n.g.	n.g.	n.g.	n.g.	1.49
Kong et al., 2016	Disuga	10NRH-09	Andesite	99.9207	28.1601	213.1	1.5	60.82	0.67	14.99	5.22	3.26	0.09	3.46	3.57	3.12	0.34	4.13	99.67	n.g.	n.g.	n.g.	n.g.	67.2	13.1	12.46	n.g.	n.g.	n.g.	64.8	789.6	13.74	178.4	13.14	n.g.	2667	48	n.g.	n.g.	n.g.	5.34	n.g.	4.72	n.g.	n.g.	n.g.	n.g.	n.g.	1.35
Kong et al., 2016	Lannitang	10LNT-07	Andesite	99.7926	28.1117	216	1.5	62.43	0.97	13.82	6.91	0.07	2.49	3.19	4.77	0.49	0.24	4.3	99.68	n.g.	n.g.	n.g.	n.g.	71.92	12.15	12.26	n.g.	n.g.	n.g.	15.29	550.9	12.96	154.1	14.04	n.g.	344.9	48.47	n.g.	n.g.	n.g.	4.78	n.g.	4.08	n.g.	n.g.	n.g.	n.g.	n.g.	1.31
Chen et al., 2017	Xiaxiaoliu	10XXL-01	Basalt	99.8752	28.0124	216.1	2.8	44.53	2.57	14.62	18.06	0.22	5.89	7.06	3.25	0.03	0.27	3.13	99.63	n.g.	n.g.	43.9	449	92.8	55.8	74	232	121	n.g.	1.24	462	34.5	154	14.7	n.g.	35.5	14.7	33.6	4.93	22.3	5.95	2.03	6.52	1.12	6.85	1.41	3.72	0.53	3.28
Chen et al., 2017	Xiaxiaoliu	10XXL-08	Basalt	99.8752	28.0124			46.86	2.08	14.59	14.82	0.21	5.75	9.8	2.47	0.04	0.25	2.7	99.57	n.g.	n.g.	34.9	379	115	48.3	73.6	200	103	n.g.	0.9	435	29.6	127	14	n.g.	53.2	14.8	31.9	4.49	19.8	5.1	1.76	5.51	0.93	5.76	1.2	3.21	0.45	2.8
Chen et al., 2017	Xiaxiaoliu	10XXL-10	Basalt	99.8752	28.0124			47.5	2.06	14.39	12.69	0.19	7.52	7.57	4.34	0.18	0.22	2.93	99.59	n.g.	n.g.	45.1	361	51.1	51	62.3	186	89	n.g.	1.95	199	31.5	122	13.1	n.g.	135	10.9	25.2	3.72	17.4	4.86	1.75	5.47	0.98	6.18	1.29	3.43	0.5	3.08
Chen et al., 2017	Xiaxiaoliu	10XXL-11	Basalt	99.8752	28.0124			46.31	2.36	13.35	15.76	0.25	6.65	9.33	2.91	0.07	0.28	2.31	99.58	n.g.	n.g.	39.3	396	116	53.4	80.2	62	133	n.g.	2.62	653	34	143	16.3	n.g.	56.1	16.3	35.9	5.14	22.7	5.83	1.95	6.34	1.1	6.79	1.41	3.77	0.53	3.32
Chen et al., 2017	Xiaxiaoliu	10XXL-17	Basalt	99.8752	28.0124			47.76	2	14.19	14.22	0.15	3.74	7.95	2.53	1.7	0.24	5.3	99.78	n.g.	n.g.	39.6	309	69.5	43.9	58.3	55	89.9	n.g.	33.4	126	29.1	119	14.4	n.g.	290	11.6	27.3	3.9	17.5	4.88	1.81	5.39	0.95	6.01	1.25	3.32	0.48	3.02
Chen et al., 2017	Xiaxiaoliu	10XXL-18	Basalt	99.8752	28.0124			45.54	2.42	14.13	14.74	0.21	6.96	10.03	2.3	0.14	0.23	2.89	99.59	n.g.	n.g.	40.5	394	62	52.3	60.1	122	104	n.g.	1.73	170	34	148	19.5	n.g.	52.1	12	28.5	4.2	19.6	5.33	1.86	5.98	1.06	6.65	1.39	3.76	0.53	3.3
Chen et al., 2017	Xiaxiaoliu	11XXL-03	Basalt	99.8752	28.0124			47.25	2.16	13.67	17.05	0.24	5.74	8.14	4.28	0.05	0.26	2.16	101	n.g.	n.g.	46.6	455	71.6	58.4	72.2	259	128	n.g.	0.88	402	34.6	157	14.6	n.g.	67.9	19.4	41.1	5.54	26	6.38	2.19	7.46	1.22	7.37	1.58	4.01	0.57	3.26
Cao et al., 2018	Pulang pluton	6628-446	Quartz diorite	99.9889	28.0639			62.82	0.54	13.66	6.81	0.04	3.07	3.49	2.24	5.06	0.48	1.55	99.76	n.g.	n.g.	14.41	111.4	54.67	15.22	15.83	117.3	33.89	16.19	204.7	734.2	13.73	180.2	11.96	8.073	1674.5	31.49	62.34	7.796	28.99	5.729	1.512	4.169	0.575	3.2	0.612	1.673	0.241	1.59
Cao et al., 2018	Pulang pluton	6628-471	Quartz diorite	99.9889	28.0639			63.67	0.53	14.11	7.17	0.03	2.86	2.61	2	5.1	0.43	1.75	100.26	n.g.	n.g.	15.01	114.7	46.91	12.54	17.04	177.6	31.59	16.57	256.1	749	14.02	194	12.63	23.51	1724.1	35.22	69.27	8.548	31.99	6.041	1.558	4.299	0.595	3.278	0.643	1.694	0.251	1.594
Cao et al., 2018	Pulang pluton	6628-487	Quartz diorite	99.9889	28.0639			62.79	0.6	14.17	5.88	0.05	2.96	3.96	2.48	4.57	0.43	1.59	99.48	n.g.	n.g.	15.11	120.3	50.37	12.84	15.32	89.36	35.11	17.02	175.1	854.4	15.12	207.2	12.91	10.58	1600.5	37.51	73.3	8.894	32.93	6.143	1.668	4.494	0.625	3.471	0.668	1.752	0.257	1.661
Cao et al., 2018	Pulang pluton	6628-581	Quartz diorite	99.9889	28.0639			64.02	0.59	14.14	5.58	0.04	2.62	3.13	2.45	5.42	0.41	0.74	99.14	n.g.	n.g.	14.55	108.1	46.19	12.4	16.14	52.45	31.96	16.24	240.1	734.7	12.92	229.9	12.02	19.06	1847	30.3	61.89	7.637	28.88	5.537	1.273	4.021	0.547	2.965	0.567	1.521	0.224	1.479
Cao et al., 2018	Pulang pluton	E002-201	Quartz diorite	99.9985	28.0521			61.07	0.69	14.63	5.37	0.06	3.46	4.51	3.22	4.37	0.39	1.1	98.87	n.g.	n.g.	16.06	135.1	61.31	9.601	21.85	72.93	36.36	16.9	147	850.4	14.71	216.7	10.99	10.8	2075.7	44.26	82.87	9.615	35.01	6.472	1.821	4.895	0.643	3.534	0.658	1.738	0.247	1.626
Cao et al., 2018	Pulang pluton	0713-655	Quartz monzonite	99.9909	28.0424			64.32	0.55	14.23	4.04	0.06	2.48	4.16	3.62	4.3	0.36	1.26	99.38	n.g.	n.g.	12.64	100.3	38.81	9.549	14.91	42.09	35.84	17.21	139.2	797	12.64	178.3	11.68	3.806	1164.6	31.79	61.71	7.434	27.04	5.038	1.251	3.647	0.505	2.826	0.546	1.528	0.219	1.449
Cao et al., 2018	Pulang pluton	0713-713	Quartz monzonite	99.9909	28.0424			64.76	0.5	13.98	4	0.05	2.24	3.7	3.27	4.42	0.33	1.79	99.04	n.g.	n.g.	11.65	88.92	37.58	10.06	12.93	218.1	35.68	16.61	158.8	742.9	12.32	174.2	11.78	5.145	1157.9	30.9	57.75	6.843	25.35	4.804	1.198	3.44	0.492	2.783	0.541	1.466	0.212	1.42
Cao et al., 2018	Pulang pluton	0713-749	Quartz monzonite	99.9909	28.0424			65.22	0.52	14.1	3.77	0.05	2.35	3.45	2.8	4.75	0.34	2.03	99.38	n.g.	n.g.	12.29	89.17	40.33	9.38	19.68	88.71	42.82	16.93	177.9	633.7	12.59	159.4	11.67	7.649	1158.4	30.26	59.68	7.164	26.61	4.99	1.223	3.636	0.518	2.895	0.558	1.491	0.211	1.45
Cao et al., 2018	Pulang pluton	0713-897	Quartz monzonite	99.9909	28.0424			64.36	0.61	14.1	4.44	0.06	2.72	4.15	3.53	4.05	0.39	0.78	99.19	n.g.	n.g.	13.66	106.4	42.66	11.02	16.24	93.35	33.8	17.04	139.1	734.3	14.08	198.7	12.53	5.089	926.2	34.4	67.34	8.101	30.1	5.644	1.354	4.068	0.57	3.189	0.614	1.66	0.244	1.591
Cao et al., 2018	Pulang pluton	0713-980	Quartz monzonite	99.9909	28.0424			65.33	0.55	14.44	4	0.04	2.44	3.25	3.54	4.6	0.35	0.63	99.17	n.g.	n.g.	12.18	96.84	41.86	10.1	14.97	35.58	29.26	17.17	172.1	766.5	12.53	180.1	11.32	5.414	1296.8	32.14	60.14	7.192	26.47	5.03	1.26	3.668	0.496	2.778	0.534	1.446	0.218	1.449
Cao et al., 2018	Pulang pluton	2812-494	Diorite porphyry	99.9905	28.0543			59.6	0.59	13.89	6.13	0.06	4.66	4.08	3.42	4.86	0.69	1.16	99.14	n.g.	n.g.	8.984	76.46	143.7	12.6	97.78	45.92	35.38	22.28	208.7	1090.4	15.15	336.7	11.78	12.33	2223.9	218.2	416.7	48.02	165.1	21.81	3.636	11.6	1.108	4.302	0.679	1.51	0.19	1.251
Cao et al., 2018	Pulang pluton	2812-495	Diorite porphyry	99.9905	28.0543			62.99	0.54	14.82	4.24	0.04	3.23	3.97	3.77	4.16	0.39	0.94	99.09	n.g.	n.g.	9.083	75.32	71.74	10.36	48.15	75.77	27.18	19.43	134.5	1417.9	12.23	249.5	10.2	4.795	1822	92.57	180.6	20.36	71.13	10.3	2.096	5.859	0.668	3.089	0.543	1.392	0.195	1.262
Cao et al., 2018	Pulang pluton	E004-207	Diorite porphyry	99.998	28.0499			59.56	0.686	14.17	7.06	0.06	3.92	3.21	2.62	5.77	0.4	1.73	99.186	n.g.	n.g.	21.3	159	132	14.2	27	91	27	16	254	627	16	166	8.2	20.5	2609	35.6	68.5	7.7	28.7	5.95	1.56	4.71	0.67	3.44	0.6	1.71	0.246	1.47
Cao et al., 2018	Pulang pluton	E601-20	Diorite porphyry	100.001	28.0512	216.6	1.9	59.92	0.572	15.19	5.35	0.077	3.79	5.2	3.27	4.01	0.42	2.5	100.299	n.g.	n.g.	12.6	99	115	18.1	32	56	38	19	122	2050	13	293	7.2	6.7	2175	90	185	21.3	77.1	11.5	2.66	6.13	0.62	2.9	0.49	1.38	0.188	1.05
Cao et al., 2018	Pulang pluton	E601-40	Diorite porphyry	100.001	28.0512			59.39	0.752	14.09	8.51	0.051	3.95	3.16	2.84	4.37	0.49	1.43	99.033	n.g.	n.g.	20.5	161	117	18.4	35	65	35	16	292	767	19	170	9.2	51.8	1748	40.9	80.3	9.25	35.7	7.51	1.56	6.07	0.8	4.13	0.69	1.88	0.27	1.62
Cao et al., 2018	Pulang pluton	E303-85	Diorite porphyry	99.9947	28.0498			60.67	0.75	13.72	3.83	0.04	4.08	3.86	2.83	6.41	0.43	2.62	99.24	n.g.	n.g.	14.3	106	114	5.6	20.8	48.8	23	18.3	201	635	13.4	344	13.5	11.05	2450	33.6	74.2	8.7	33	6.26	2.03	4.41	0.53	2.84	0.53	1.43	0.21	1.32
Cao et al., 2018	Pulang pluton	E101-500	Diorite porphyry	99.9965	28.0531			59.97	0.833	14.22	7.36	0.068	4.16	5	2.93	4.68	0.48	1.13	100.831	n.g.	n.g.	21.8	171	102	17.6	29	13	31	16	167	830	18	182	8.9	8.8	2154	39.5	77.3	8.84	33.1	7	1.77	5.48	0.7	3.67	0.65	1.73	0.247	1.55
Cao et al., 2018	Pulang pluton	PB1*	MME	n.g.	n.g.			59.25	0.56	13.41	6.15	0.062	5.21	4.63	2.7	4.79	0.76	1.96	99.482	n.g.	n.g.	9.56	81.3	138	20	109	14.8	54.5	25.1	185	1560	22.2	664	13.7	16	2438	225	412	50.8	182	24.6	5.62	15.7	1.3	4.95	0.739	1.87	0.206	1.28
Cao et al., 2018	Pulang pluton	PB2*	MME	n.g.	n.g.			63	0.56	13.66	5.76	0.055	4.11	2.64	2.95	4.03	0.61	2.36	99.735	n.g.	n.g.	8.77	76.2	117	17	84.2	23.6	50.3	23.3	148	1320	18.5	568	12.7	13.3	2155	189	359	43.4	156	20.4	4.42	12.6	1.09	4.08	0.643	1.67	0.191	1.15
Cao et al., 2018	Pulang pluton	PB4*	MME	n.g.	n.g.			59.42	0.69	13.88	6.22	0.06	5.45	4.35	2.74	4.57	0.66	1.42	99.46	n.g.	n.g.	11.4	96.2	115	21.4	93.3	20.1	102	24	202	1466	21.6	491	14.6	20.1	2180	147	245	32	117	16.8	3.91	11.1	1.05	4.33	0.73	1.92	0.238	1.47
Cao et al., 2018	Pulang pluton	PL03-29*	MME	n.g.	n.g.			61.78	0.55	13.01	5.82	0.064	4.86	4.01	3.7	3.5	0.55	1.64	99.484	n.g.	n.g.	13.5	95.2	149	13	72.6	8.62	41.5	25.1	123	1182	16.6	423	12.2	9.54	1562	158	273	35.2	123	16.4	3.12	10.7	0.994	3.75	0.599	1.53	0.188	1.26
Yang et al., 2018	Pulang pluton	13SBB2	Quartz diorite porphyry	99.9926	28.046	225.9	3.7	60.9	0.74	14.8	5.3	0.07	3.74	5.33	3.11	4.15	0.41	1.17	99.72	n.g.	n.g.	15.6	157	71	8.5	39.2	n.g.	n.g.	n.g.	123.5	538	22.3	120.5	13.9	n.g.	410	24.3	53.4	6.3	22	4.8	1	4.4	0.7	4	0.8	2.4	0.4	2.6
Yang et al., 2018	Pulang pluton	13SBB3	Quartz diorite porphyry	99.9926	28.046			59.8	0.72	14.2	5.36	0.07	3.63	4.78	3.24	4.11	0.42	2.17	98.5	n.g.	n.g.	13.9	154	70	8.1	37.7	n.g.	n.g.	n.g.	124.5	509	26.8	110	12.4	n.g.	380	36.9	80.7	10	34.5	6.9	1.3	6	0.9	5	1	2.7	0.4	2.7
Yang et al., 2018	Pulang pluton	13SBB4	Quartz diorite porphyry	99.9926	28.046			58.9	0.75	14.17	7.09	0.07	3.91	5.28	3	3.59	0.41	1.37	98.54	n.g.	n.g.	16.7	174	76	6.8	41.6	n.g.	n.g.	n.g.	170	538	26.4	126	13.2	n.g.	550	35.5	78.6	9.7	33.1	6.8	1.3	6.1	0.9	5.1	1	2.8	0.5	2.8
Yang et al., 2018	Pulang pluton	13SBB5	Quartz diorite porphyry	99.9926	28.046			60.6	0.72	14.95	2.97	0.05	3.48	5.24	3.19	2.77	0.41	4.25	98.63	n.g.	n.g.	14.2	160	68	4.5	34	n.g.	n.g.	n.g.	123.5	536	27.5	114.5	12.3	n.g.	400	29	65.1	9.2	31.5	6.6	1.1	5.6	0.8	5	1	2.8	0.4	2.9
Yang et al., 2018	Pulang pluton	13BQMB7	Quartz monzonite porphyry	99.9926	28.046			64.7	0.8	16.85	2.07	0.01	2.28	2.91	4.38	3.42	0.13	0.98	98.53	n.g.	n.g.	20.5	152	58	14.1	24.9	n.g.	n.g.	n.g.	107.5	964	17.9	70.5	11.8	n.g.	2180	31.3	63.5	7.8	27.3	6	1.8	5.1	0.7	3.5	0.6	1.7	0.3	1.6
Yang et al., 2018	Pulang pluton	13BQMB8	Quartz monzonite porphyry	99.9926	28.046	215.4	1.8	65.4	0.77	16.55	2.57	0.02	2.42	2.83	4.01	3.24	0.13	1.2	99.14	n.g.	n.g.	20.8	143	54	15.2	22.8	n.g.	n.g.	n.g.	105	769	17.6	62.9	11.7	n.g.	2130	33.8	69.1	7.9	28.1	5.9	1.7	5	0.6	3.4	0.6	1.7	0.3	1.6
Yang et al., 2018	Pulang pluton	13BQMB9	Quartz monzonite porphyry	99.9926	28.046			62.6	0.87	17.6	2.54	0.02	2.53	2.7	3.96	4.49	0.14	1.18	98.63	n.g.	n.g.	21.6	153	55	17.3	24.6	n.g.	n.g.	n.g.	106	878	17.9	67.7	11.6	n.g.	1820	40.4	77.8	8.6	29.8	6.1	1.7	5.2	0.7	3.5	0.6	1.7	0.3	1.6
Yang et al., 2018	Pulang pluton	13BQMB10	Quartz monzonite porphyry	99.9926	28.046			64.7	0.77	16.45	2.48	0.02	2.41	2.66	4	3.45	0.14	1.22	98.3	n.g.	n.g.	19.2	146	46	14.9	19.1	n.g.	n.g.	n.g.	104.6	1000	19.5	49.8	12.2	n.g.	1510	47.4	94.5	11.3	38.7	7.2	2.1	5.9	0.7	3.8	0.7	1.9	0.3	1.8
Yang et al., 2018	Pulang pluton	13BQMB11	Quartz monzonite porphyry	99.9926	28.046			63.7	0.67	14	2.81	0.05	4.16	6.42	3.01	2.22	0.38	1.42	98.84	n.g.	n.g.	22	154	47	5.4	21.6	n.g.	n.g.	n.g.	97	1010	18.8	49	11	n.g.	1180	21.5	48.6	5.9	22.7	5.6	1.8	5.2	0.7	3.6	0.7	1.7	0.2	1.6
Yang et al., 2018	Pulang pluton	PL-BB-B4	Quartz monzonite porphyry	99.9926	28.046			64.1	0.52	15.35	4.5	0.03	1.9	3.09	3.48	3.83	0.25	1.83	98.88	n.g.	n.g.	11.3	95	19	4.6	15.1	n.g.	n.g.	n.g.	98.4	1015	14.6	69.6	9.6	n.g.	2070	20.1	41	4.5	16.3	3.5	1.1	3.3	0.4	2.5	0.5	1.4	0.2	1.4
Yang et al., 2018	Pulang pluton	ZKE401-11-2	Quartz monzonite porphyry	99.9926	28.046			63.2594	0.493367	15.3955	3.53282	0.0470449	1.77259	3.39258	7.35518	3.28951	0.194918	1.06705	99.8	n.g.	n.g.	7.447	57.94	18.94	7.707	11.37	n.g.	n.g.	n.g.	102.6	1070.1	11.36	34.01	12.55	n.g.	1247.8	35.88	67.09	7.573	26.93	4.184	1.074	3.395	0.422	2.241	0.424	1.077	0.154	0.968
Yang et al., 2018	Xuejiping pluton	XJP-B7	Quartz diorite porphyry	99.8354	27.9849	221.1	2.9	58.3736	0.8825	15.4147	6.03639	0.109445	2.37934	4.10223	4.55456	3.60891	0.327597	0.990671	96.78	n.g.	n.g.	12.62	113.5	23.29	13.31	11.72	n.g.	n.g.	n.g.	105.6	107	12.09	148.5	16.04	n.g.	1679.9	34.33	63.74	7.208	26.22	4.537	1.134	3.81	0.478	2.553	0.492	1.455	0.194	1.267
Yang et al., 2018	Xuejiping pluton	XJP-B5	Quartz monzonite porphyry	99.8354	27.9849	214.3	2.4	67.1579	0.637943	13.3796	1.49645	0.834905	1.04674	5.45055	3.35062	2.02887	0.110802	4.79565	100.29	n.g.	n.g.	12.43	114.6	17.43	11.91	12.09	n.g.	n.g.	n.g.	100.7	716.7	17.84	187	21.36	n.g.	2624	60.51	106.7	11.54	41.09	6.627	1.829	5.476	0.68	3.57	0.689	1.818	0.254	1.663
Yang et al., 2018	Songnuo pluton	SN-5ZK1501	Quartz monzonite porphyry	99.9618	28.1279			64.5127	0.396589	15.666	2.69417	0.0223877	1.65427	2.93725	4.11837	3.16512	0.160541	1.46258	96.79	n.g.	n.g.	6.844	49.7	28.19	6.352	53.38	n.g.	n.g.	n.g.	105.8	899.1	11.74	165.9	9.85	n.g.	1261.8	33.82	62.03	6.929	24.64	3.872	0.972	3.14	0.406	2.172	0.431	1.165	0.176	1.186
Yang et al., 2018	Songnuo pluton	SN-5ZK2301	Quartz monzonite porphyry	99.9618	28.1279			61.2859	0.606232	14.5129	4.62678	0.0545117	2.52407	3.59712	4.70086	3.52426	0.323399	1.15403	96.91	n.g.	n.g.	14.26	101.8	44.66	11.01	15.66	n.g.	n.g.	n.g.	259.5	721.5	17.31	139.5	12.44	n.g.	1845.9	37.35	70.64	8.224	31.11	5.772	1.377	4.925	0.645	3.43	0.647	1.734	0.251	1.616
Yang et al., 2018	Songnuo pluton	SN-5ZK3901	Quartz monzonite porphyry	99.9618	28.1279	218.8	2.6	63.6792	0.466999	15.9628	3.2269	0.0372518	1.65165	3.58822	3.99358	3.36504	0.181717	0.816624	96.97	n.g.	n.g.	7.053	57.66	15.86	5.561	10.55	n.g.	n.g.	n.g.	116.5	1031.3	13.17	167.2	10.41	n.g.	1267.9	33.2	62.78	7.258	26.22	4.289	1.084	3.556	0.458	2.46	0.488	1.314	0.191	1.245
Yang et al., 2018	Songnuo pluton	SN-5ZK3202	Quartz monzonite porphyry	99.9618	28.1279			64.3445	0.442115	15.401	2.91026	0.0323004	1.58519	3.20825	4.06157	3.67197	0.178948	0.953895	96.79	n.g.	n.g.	6.411	48.72	15.86	4.79	10.35	n.g.	n.g.	n.g.	124.8	876.8	11.88	156.3	11.2	n.g.	1274.5	29.83	55.74	6.3	22.87	3.748	0.991	3.148	0.418	2.238	0.443	1.208	0.176	1.152
Wang et al., 2018	Pulang pluton	PL-60	Quartz monzonite porphyry	99.9926	28.0533	211.6	3.1	66.05	0.48	14.69	3.66	0.04	1.97	2.75	3.83	4.37	0.28	1.07	99.19	n.g.	n.g.	9.37	72.7	32.1	7.92	17.7	2192	42.5	17.1	97.7	811	12.2	167	10.8	5.87	985	23.1	44.2	4.97	18.6	3.5	0.93	2.81	0.4	2.18	0.4	1.19	0.17	1.12
Wang et al., 2018	Pulang pluton	PL-62	Quartz monzonite porphyry	99.9926	28.0533			66.38	0.5	14.52	3.67	0.05	2	3.11	3.61	4.17	0.28	0.73	99.02	n.g.	n.g.	9.95	72.5	24.3	7.98	13.3	2628	35.4	16.8	104	774	13	167	10.6	5.65	912	24.6	46.9	5.25	19.9	3.75	0.98	3.01	0.43	2.29	0.42	1.22	0.17	1.14
Wang et al., 2018	Pulang pluton	PL-64	Quartz monzonite porphyry	99.9926	28.0533			66.87	0.46	14.53	3.35	0.04	1.79	2.91	3.35	4.57	0.3	0.94	99.11	n.g.	n.g.	8.34	67	23.4	7.04	12.2	2407	39.7	15.9	93.2	803	10.5	134	9.16	3.08	1417	21.3	40.6	4.51	16.8	3.44	0.87	2.32	0.34	1.83	0.36	0.95	0.14	0.98
Wang et al., 2018	Pulang pluton	PL-65	Quartz monzonite porphyry	99.9926	28.0533			66.82	0.5	14.59	3.83	0.02	2.08	2.85	2.96	4.25	0.32	1.14	99.36	n.g.	n.g.	8.9	82.6	23.9	6.53	15.1	3874	57.5	18	106	853	10.8	181	9.68	4.84	1107	16.3	31.5	3.62	14.3	2.82	0.83	2.24	0.32	1.83	0.32	0.99	0.14	0.9
Wang et al., 2018	Pulang pluton	PL-66	Quartz monzonite porphyry	99.9926	28.0533			65.51	0.52	15.36	3.61	0.03	2.14	2.96	3.58	3.58	0.28	1.72	99.29	n.g.	n.g.	9.33	74.5	23.5	6.06	15.3	837	26	17.9	85.2	908	13.1	170	10.7	4.61	1240	19.5	38.7	4.61	18.4	3.71	0.92	3.02	0.42	2.39	0.43	1.15	0.17	1.27
Wang et al., 2018	Pulang pluton	PL-202	Quartz monzonite porphyry	99.9926	28.0533			65.57	0.5	15.18	3.4	0.02	2.09	3.13	3.9	3.66	0.34	1.66	99.45	n.g.	n.g.	9.02	70.3	22	7.08	15	637	18.1	18.6	101	898	14.8	161	10	4.29	1026	33.1	62.7	6.92	25.5	4.45	1.32	3.49	0.48	2.66	0.5	1.38	0.19	1.32
Wang et al., 2018	Pulang pluton	PL-209	Quartz monzonite porphyry	99.9926	28.0533			67.82	0.54	14.15	4.16	0.02	2.03	1.76	3.11	4.84	0.39	1.09	99.91	n.g.	n.g.	11.1	88.2	32.4	8.86	12.5	4864	24.6	17.2	173	668	14.7	167	11.7	5.43	761	21.2	42.8	4.92	19.4	3.95	0.99	3.29	0.47	2.57	0.49	1.28	0.19	1.31
Wang et al., 2018	Pulang pluton	PL-210	Quartz monzonite porphyry	99.9926	28.0533	214.1	2.9	65.29	0.57	14.58	3.68	0.03	2.36	2.97	3.56	4.84	0.38	1.02	99.28	n.g.	n.g.	11.5	86.1	32.9	8.43	13.3	1674	23.7	16.9	165	652	14.6	172	12.4	8.19	959	29.1	55.2	6.15	22.9	4.32	1.12	3.51	0.49	2.69	0.47	1.38	0.2	1.42
Wang et al., 2018	Pulang pluton	PL-215	Quartz monzonite porphyry	99.9926	28.0533			66.23	0.77	14.8	2.13	0.01	3.77	2.96	4.12	2.29	0.52	1.59	99.19	n.g.	n.g.	20.3	154	49.5	5.54	18.5	7787	25.9	16.7	202	704	16.1	189	12.1	9.45	157	13.2	32.7	4.39	18.9	4.19	1.03	3.88	0.55	2.97	0.57	1.56	0.22	1.52
Wang et al., 2018	Pulang pluton	PL-221	Quartz diorite porphyry	99.9926	28.0533	214.3	2.9	60.53	0.76	14.78	6.24	0.08	3.74	4.61	3.33	4.78	0.37	0.9	100.12	n.g.	n.g.	18.5	140	64	11.7	24.2	25.4	30.6	16.9	173	761	18.7	167	11.7	9.65	2335	43.2	76.2	8.72	33	6.09	1.74	5.14	0.68	3.54	0.66	1.7	0.25	1.62
Wang et al., 2018	Pulang pluton	PL-223	Quartz diorite porphyry	99.9926	28.0533			61.85	0.73	14.78	3.83	0.05	3.6	5.27	3.67	3.8	0.42	1.04	99.04	n.g.	n.g.	17.2	128	54.6	14.3	21	51.8	20.4	15.9	103	951	18.5	152	11.5	2.09	2356	41.4	77.1	8.75	32.7	6.33	1.67	4.95	0.67	3.44	0.66	1.69	0.25	1.53
Wang et al., 2018	Pulang pluton	PL-225	Quartz diorite porphyry	99.9926	28.0533			62.02	0.77	14.75	3.29	0.05	4.15	4.68	4.92	1.11	0.49	3.89	100.12	n.g.	n.g.	19.4	136	60.5	11.1	21.6	913	53.1	19.2	78.3	663	19.8	160	11.5	4.48	236	10.5	29.8	4.76	22.2	5.98	1.87	5.3	0.73	3.95	0.71	1.79	0.26	1.72
Wang et al., 2018	Pulang pluton	PL01	Quartz diorite porphyry	99.9926	28.0533			63.96	0.76	14.57	5.03	0.05	3.8	2.1	3.22	4.49	0.51	1.32	99.81	n.g.	n.g.	17.93	123.3	66.08	10.64	22.69	213.2	52.19	17.73	206.8	659.8	16.93	195.2	13.43	14.14	1424.4	32.15	66.87	7.996	31.07	6.073	1.375	4.903	0.66	3.515	0.66	1.732	0.244	1.58
Wang et al., 2018	Pulang pluton	PL05	Quartz diorite porphyry	99.9926	28.0533			66.37	0.53	15.64	3.4	0.03	2.37	3.39	5	1.37	0.3	1.18	99.58	n.g.	n.g.	10.01	77.82	37.84	12.04	14.69	742.1	61.01	17.89	65.46	1009.7	7.335	221.5	10.84	5.308	508	16.6	30.52	3.215	11.79	2.117	0.706	1.904	0.243	1.335	0.266	0.734	0.11	0.77
Wang et al., 2018	Pulang pluton	PL-229	Granodiorite porphyry	99.9926	28.0533	208.8	2.9	68.56	0.51	14.4	4.81	0.01	0.12	2.24	5.79	0.67	0.28	1.56	98.95	n.g.	n.g.	3.49	30.6	25.2	22.9	13.4	73.5	2.27	10.8	31.5	867	7.36	165	9.22	1.04	209	9.65	19.5	2.28	8.69	1.76	0.67	1.5	0.2	1.12	0.24	0.67	0.1	0.85
Wang et al., 2018	Pulang pluton	PL08	Granodiorite porphyry	99.9926	28.0533			64.96	0.51	15.17	3.73	0.03	2.26	3.07	3.46	4.86	0.29	0.98	99.32	n.g.	n.g.	10.15	71.98	34.57	9.338	17.02	92.38	36.39	16.94	143.2	941.8	13.02	177.4	9.911	5.48	1813	31.2	59.1	6.946	25.85	4.607	1.357	3.555	0.476	2.512	0.488	1.3	0.189	1.23
Wang et al., 2018	Pulang pluton	PL03	Granodiorite porphyry	99.9926	28.0533			65.29	0.49	15.72	4.06	0.06	1.91	3.43	3.86	3.64	0.25	0.81	99.52	n.g.	n.g.	10.64	74.15	25.86	9.408	12.14	136.2	59.76	18.67	126.8	916.2	14.64	209.3	11.24	5.964	1142.4	32.6	63.61	7.413	27.23	4.76	1.2	3.918	0.518	2.796	0.544	1.49	0.222	1.44
Wang et al., 2018	Pulang pluton	PL04	Granodiorite porphyry	99.9926	28.0533			69.71	0.61	16.83	1.08	0.02	1	2.05	5.67	1.43	0.31	1.34	100.05	n.g.	n.g.	8.483	44.12	43.45	2.164	6.946	38.21	39.78	15.63	72.15	1020.7	5.144	203.5	10.87	2.359	368.1	9.038	17.9	2.188	8.606	1.629	0.75	1.326	0.167	0.902	0.187	0.548	0.085	0.64
Wang et al., 2019	Xiuwacu pluton	SXWC10-1	Quartz monzonite	99.9801	28.4493			68.47	0.36	15.15	2.92047	0.04	1.34	2.62	3.68	3.69	0.164	0.75	99.1845	n.g.	n.g.	n.g.	n.g.	15.4	n.g.	7.41184	n.g.	n.g.	16.3	234	474	17.3	162	21.9	n.g.	896	53.5	94.2	9.66	32.4	4.89	1.03699	3.67342	0.548	3.02	0.6	1.86	0.274	1.98
Wang et al., 2019	Xiuwacu pluton	SXWC10-6	Quartz monzonite	99.9801	28.4493			69.21	0.34	14.48	3.09047	0.03	1.16	2.16	3.52	4.43	0.16	0.87	99.4505	n.g.	n.g.	n.g.	n.g.	12.2	n.g.	5.25182	n.g.	n.g.	15.8	197	475	16.3	159	22	n.g.	1040	41.2	75	7.99	28.5	4.65	0.976473	3.71174	0.523	2.94	0.586	1.77	0.26	1.89
Wang et al., 2019	Xiuwacu pluton	XWC10-8	Quartz monzonite	99.9801	28.4493			69.22	0.37	14.49	3.44053	0.03	1.22	2.28	3.5	4.29	0.166	0.55	99.5565	n.g.	n.g.	n.g.	n.g.	13.3	n.g.	6.07348	n.g.	n.g.	15.2	164	576	13.6	148	18.4	n.g.	976	44.6	77.6	7.93	27.6	4.32	0.850546	3.23342	0.477	2.44	0.455	1.46	0.216	1.51
Wang et al., 2019	Xiuwacu pluton	XWC10-10	Quartz monzonite	99.9801	28.4493			69.09	0.369	15	2.75	0.0636	1.26	2.869	3.697	4.182	0.1806	1.032	100.493	n.g.	n.g.	n.g.	n.g.	8.39341	n.g.	4.14834	n.g.	n.g.	15.3196	247	531	17.7593	144.152	21.684	n.g.	891.301	42.3502	75.9108	8.12085	26.9408	4.46141	1.06061	3.74837	0.550844	2.65051	0.592729	1.66606	0.242387	1.65113
Wang et al., 2019	Xiuwacu pluton	SXWC10-11	Quartz monzonite	99.9801	28.4493			67.31	0.38	14.91	3.79062	0.05	1.28	2.16	3.18	5.02	0.185	1.01	99.2756	n.g.	n.g.	n.g.	n.g.	15.5	n.g.	7.42879	n.g.	n.g.	15.5	239	535	16.1	173	20.4	n.g.	1130	41.4	78	8.43	30.8	5.06	0.965927	3.82975	0.597	3	0.617	1.77	0.269	1.88
Wang et al., 2019	Xiuwacu pluton	SXWC10-12	Quartz monzonite	99.9801	28.4493			70.46	0.32	15.05	2.31	0.0517	1.06	2.661	3.637	4.135	0.1483	0.951	100.784	n.g.	n.g.	n.g.	n.g.	11.1473	n.g.	5.87176	n.g.	n.g.	15.7278	203	599	16.0251	140.579	20.8717	n.g.	714.74	41.3663	73.888	7.59846	25.5516	3.8946	1.01174	3.33314	0.488892	2.38241	0.51548	1.50172	0.219062	1.52593
Wang et al., 2019	Xiuwacu pluton	XS12-10	Quartz monzonite	99.9801	28.4493			63.92	0.43	16.39	3.76	0.08	2.09	4.09	4.07	3.7	0.238	0.69	99.458	n.g.	n.g.	n.g.	n.g.	16.4	n.g.	8.55539	n.g.	n.g.	16.4	152.785	766	17.1	143	17.4	n.g.	1060	46.6	87.2	9.38	34.1	5.5	1.2572	3.97427	0.63	3.23	0.658	1.88	0.275	1.76
Wang et al., 2019	Xiuwacu pluton	XS12-13	Quartz monzonite	99.9801	28.4493			66.39	0.41	15.36	2.71	0.07	1.48	3.19	3.66	4.91	0.197	0.7	99.077	n.g.	n.g.	n.g.	n.g.	10.4	n.g.	6.36995	n.g.	n.g.	14.9	150.586	623	17.6	169	21.3	n.g.	1190	51.3	96.1	9.96	35.3	5.43	1.14738	4.05756	0.608	3.18	0.659	2.01	0.29	2.03
Wang et al., 2019	Xiuwacu pluton	XS12-14	Quartz monzonite	99.9801	28.4493			69.56	0.34	14.53	3.2205	0.03	1.13	2.16	3.5	4.49	0.16	0.6	99.7205	n.g.	n.g.	n.g.	n.g.	12.9	n.g.	5.32806	n.g.	n.g.	15.5	190.156	526	17.1	165	21.4	n.g.	1010	76.9	132	13	43.3	5.96	1.0191	4.13397	0.62	3.07	0.61	1.97	0.299	2.06
Wang et al., 2019	Xiuwacu pluton	XS12-17	Quartz monzonite	99.9801	28.4493	220.7	3.4	63.37	0.45	16.42	3.66	0.08	2.27	4.34	4.12	3.45	0.249	0.83	99.239	n.g.	n.g.	n.g.	n.g.	14.3	n.g.	9.48716	n.g.	n.g.	16.7	154.983	764	17.7	132	17.5	n.g.	1110	42.1	82.6	9.01	34	5.83	1.33897	4.19027	0.635	3.45	0.63	1.98	0.261	1.84
Wang et al., 2019	Xiuwacu pluton	XS12-01	Monzonite	99.9801	28.4493			65.23	0.44	16.07	4.38	0.04	2.03	2.42	3.9	3.47	0.198	1.21	99.388	n.g.	n.g.	n.g.	n.g.	34.6	n.g.	16.0943	n.g.	n.g.	19.3	282.487	683	13	188	20.4	n.g.	915	47.5	82.1	8.17	28.1	4.05	0.69724	3.13262	0.44	2.2	0.451	1.34	0.209	1.51
Wang et al., 2019	Xiuwacu pluton	XS12-02	Monzonite	99.9801	28.4493			66.62	0.38	15.77	3.34051	0.04	1.71	2.92	3.77	3.56	0.196	1.02	99.3265	n.g.	n.g.	n.g.	n.g.	25.6	n.g.	16.8567	n.g.	n.g.	16.4	196.751	770	14.3	192	16.4	n.g.	1100	39.8	73.9	7.58	26.3	3.9	0.914898	3.12431	0.469	2.54	0.504	1.51	0.232	1.71
Wang et al., 2019	Xiuwacu pluton	XS12-03	Monzonite	99.9801	28.4493			66.7	0.38	15.93	3.60055	0.05	2.03	3.19	4.25	2.62	0.188	0.77	99.7085	n.g.	n.g.	n.g.	n.g.	32.2	n.g.	24.3956	n.g.	n.g.	17.9	198.95	761	15.7	194	15.5	n.g.	733	41.1	75.5	7.84	28.3	4.5	0.800536	3.26883	0.518	2.82	0.558	1.69	0.26	1.75
Wang et al., 2019	Xiuwacu pluton	XS12-04	Monzonite	99.9801	28.4493			67.06	0.38	15.69	3.34051	0.04	1.69	2.87	3.76	3.59	0.191	1.05	99.6615	n.g.	n.g.	n.g.	n.g.	27	n.g.	17.1955	n.g.	n.g.	16.8	214.338	808	15	168	16.3	n.g.	1320	55.4	98	9.97	34.9	4.99	1.01045	3.55575	0.556	2.91	0.581	1.7	0.255	1.82
Wang et al., 2019	Xiuwacu pluton	XS12-05	Monzonite	99.9801	28.4493			66.03	0.39	15.86	3.55053	0.06	2.07	3.2	4.28	2.89	0.199	1	99.5295	n.g.	n.g.	n.g.	n.g.	38.3	n.g.	28.1227	n.g.	n.g.	16.9	185.76	682	15.6	184	15.9	n.g.	842	39.8	73.9	7.56	27.4	4.41	0.992181	3.2298	0.542	2.75	0.562	1.63	0.259	1.69
Wang et al., 2019	Xiuwacu pluton	XS12-06	Monzonite	99.9801	28.4493			67.12	0.36	15.52	3.77	0.04	1.6	2.66	3.76	3.59	0.193	1.03	99.643	n.g.	n.g.	n.g.	n.g.	23.1	n.g.	13.3837	n.g.	n.g.	17.2	200.049	733	13.3	146	19.7	n.g.	1030	46.8	86.3	8.94	30.9	4.57	0.744806	3.31932	0.449	2.24	0.442	1.36	0.205	1.35
Wang et al., 2019	Xiuwacu pluton	XS12-07	Monzonite	99.9801	28.4493	217.5	1.5	66.91	0.37	15.67	3.95	0.04	1.6	2.52	3.83	3.59	0.19	0.97	99.64	n.g.	n.g.	n.g.	n.g.	22.1	n.g.	13.7225	n.g.	n.g.	17	203.346	735	12.9	146	18.8	n.g.	1010	45.5	81.4	8.5	29.3	4.44	0.788343	2.95256	0.466	2.18	0.431	1.38	0.194	1.42
Wang et al., 2019	Xiuwacu pluton	XWC11-42	Quartz monzonite	99.9801	28.4493	213.9	1.7	63.17	0.627	16.98	4.98	0.0954	2.04	4.081	3.932	3.873	0.4727	1.021	101.272	n.g.	n.g.	n.g.	n.g.	7.77388	n.g.	5.15943	n.g.	n.g.	18.5125	211.973	746.1	27.1019	193.89	41.105	n.g.	1215.81	55.1363	102.339	11.6237	40.7592	6.78386	1.70712	5.73662	0.844439	4.01384	0.87715	2.5059	0.363546	2.62545
Wang et al., 2019	Xiuwacu pluton	XWC11-43	Quartz monzonite	99.9801	28.4493			62.59	0.624	17.08	5.06	0.1021	2.09	4.281	4.033	3.888	0.4924	0.802	101.043	n.g.	n.g.	n.g.	n.g.	6.83028	n.g.	4.79775	n.g.	n.g.	19.5189	186.287	788.337	30.7567	195.986	38.2897	n.g.	1111.52	52.6832	99.1431	10.884	39.1038	6.68334	1.48731	5.82171	0.874795	4.28474	0.964829	2.86445	0.427801	2.87922
Wang et al., 2019	Xiuwacu pluton	XWC11-45	Quartz monzonite	99.9801	28.4493			62.39	0.618	17.05	5	0.1027	2.06	4.289	3.946	3.926	0.4779	1.118	100.978	n.g.	n.g.	n.g.	n.g.	8.12474	n.g.	5.03818	n.g.	n.g.	18.5019	175.551	848.913	22.3033	179.223	29.7993	n.g.	1252.11	60.1141	105.579	11.2313	38.5253	6.19095	1.69668	5.4669	0.740099	3.52208	0.754416	2.10708	0.281242	1.98412
Wang et al., 2019	Xiuwacu pluton	XWC11-46	Quartz monzonite	99.9801	28.4493			62.09	0.627	17.04	4.74	0.0979	2.03	4.197	4.171	3.813	0.4736	0.995	100.275	n.g.	n.g.	n.g.	n.g.	7.3382	n.g.	5.31717	n.g.	n.g.	19.1973	221.699	815.741	19.5589	194.253	27.8512	n.g.	1102.95	60.3411	102.022	10.4829	35.3997	5.29802	1.43112	4.89579	0.643962	2.8824	0.636215	1.87331	0.26174	1.83137
Wang et al., 2019	Hongshan pluton	HS11-114	Monzonite	99.8842	28.1363	216	1.5	60.54	1.02	15.23	5.51	0.0825	2.44	3.302	5.04	3.618	0.4085	3.218	100.409	n.g.	n.g.	n.g.	n.g.	12.202	n.g.	7.30987	n.g.	n.g.	18.6113	95.968	1105.89	19.2162	203.444	21.4652	n.g.	1776.88	49.9953	88.8475	9.42024	33.7983	5.96317	1.75392	5.01928	0.735708	3.34104	0.663533	1.81829	0.257564	1.6175
Wang et al., 2019	Hongshan pluton	HS11-115	Monzonite	99.8842	28.1363			59.6	1.158	15.35	6.30066	0.0791	2.72	3.506	4.812	3.407	0.475	3.096	100.504	n.g.	n.g.	n.g.	n.g.	12.196	n.g.	7.7922	n.g.	n.g.	18.311	113.75	1119.53	20.0868	193.497	21.9354	n.g.	2211.12	51.6328	92.7633	9.96448	36.2035	6.28207	1.89999	5.61557	0.805152	3.66441	0.754958	2.04717	0.24829	1.67319
Wang et al., 2019	Hongshan pluton	HS11-116	Monzonite	99.8842	28.1363			59.58	1.145	15.09	6.35	0.0863	2.65	4.178	4.765	3.26	0.4732	3.068	100.645	n.g.	n.g.	n.g.	n.g.	11.2602	n.g.	8.42685	n.g.	n.g.	20.0512	75.9779	1421.5	21.9574	215.275	23.3463	n.g.	2328.54	52.6615	96.347	10.5263	38.4901	6.871	2.13123	5.85908	0.886355	3.97952	0.805054	2.15935	0.29491	1.83281
Wang et al., 2019	Hongshan pluton	HS11-118	Monzonite	99.8842	28.1363			59.58	1.032	15.12	5.67076	0.097	2.45	3.869	5.369	3.096	0.4166	3.806	100.506	n.g.	n.g.	n.g.	n.g.	11.7839	n.g.	7.55543	n.g.	n.g.	18.1948	92.1365	1216.68	19.4317	201.743	21.6456	n.g.	1741.87	50.6688	92.427	9.99456	35.6896	6.28074	1.8658	5.32792	0.775991	3.58219	0.706196	1.99267	0.245128	1.64038
Wang et al., 2019	Hongshan pluton	HS11-119	Monzonite	99.8842	28.1363			61.77	1.019	15.22	5.55	0.0882	2.37	3.783	5.255	3.204	0.4114	1.33	100.001	n.g.	n.g.	n.g.	n.g.	12.6136	n.g.	7.44608	n.g.	n.g.	18.7379	103.136	1290.76	20.0385	199.543	21.7496	n.g.	1854.8	51.16	92.0833	9.85494	36.5365	6.39519	1.96223	5.39704	0.777077	3.5035	0.747943	2.02339	0.255678	1.64498
Note: For samples with no reported latitude and longitude, if the latitude and longitude can be estimated from sampling location illustrated in geological map in the original papers, the estimated latitude and longitude are shown as greay figures. When the latitude and longitude can not be estimated, they are shown as 'n.g.'. Some dated samples have no available geochemical compositions and their…
* n.g. Not given
[truncated: 6 more columns]

## Sheet: Table S5
TABLE S5. COMPILED IN-SITU ZIRCON Hf ISOTOPES ANALYZED BY LA-MC-ICP-MS FOR LATE TRIASSIC IGNEOUS ROCKS IN THE YIDUN TERRANE
References	Igneous bodies	Longitude	Latitude	Sample ID and spot	Age(Ma)	176Yb/177Hf	176Lu/177Hf	176Hf/177Hf	2σ	176Hf/177Hf i	εHf(0)	εHf(t)	2σ
Wu et al., 2017	Sucuoma pluton	98.9358	31.5263	SCM-10 1	235	0.0252714	0.000920359	0.28261	1.96078e-05	0.282606	-6.17772	-1.09686	0.693744
Wu et al., 2017	Sucuoma pluton	98.9358	31.5263	SCM-10 2	235	0.0242165	0.000928689	0.282609	1.98715e-05	0.282605	-6.22137	-1.14183	0.703075
Wu et al., 2017	Sucuoma pluton	98.9358	31.5263	SCM-10 3	235	0.0337885	0.00125965	0.282606	1.93985e-05	0.282601	-6.32732	-1.29932	0.686338
Wu et al., 2017	Sucuoma pluton	98.9358	31.5263	SCM-10 4	235	0.0271121	0.00101348	0.282628	2.19075e-05	0.282623	-5.5677	-0.501004	0.77511
Wu et al., 2017	Sucuoma pluton	98.9358	31.5263	SCM-10 5	235	0.0293622	0.00109542	0.282589	1.99451e-05	0.282585	-6.91418	-1.86094	0.705679
Wu et al., 2017	Sucuoma pluton	98.9358	31.5263	SCM-10 6	235	0.0324789	0.00120903	0.282598	1.64621e-05	0.282593	-6.60525	-1.56952	0.582446
Wu et al., 2017	Sucuoma pluton	98.9358	31.5263	SCM-10 7	235	0.0216754	0.000857355	0.282611	2.55061e-05	0.282607	-6.14701	-1.05633	0.902433
Wu et al., 2017	Sucuoma pluton	98.9358	31.5263	SCM-10 8	235	0.0201005	0.000774404	0.282613	2.03477e-05	0.28261	-6.07959	-0.975971	0.719922
Wu et al., 2017	Sucuoma pluton	98.9358	31.5263	SCM-10 9	235	0.03546	0.00130936	0.282608	1.93232e-05	0.282602	-6.25596	-1.23566	0.683674
Wu et al., 2017	Sucuoma pluton	98.9358	31.5263	SCM-10 10	235	0.0262354	0.000981273	0.282585	1.882e-05	0.28258	-7.08249	-2.01158	0.665871
Wu et al., 2017	Sucuoma pluton	98.9358	31.5263	SCM-10 11	235	0.0294951	0.00108509	0.282608	1.62077e-05	0.282603	-6.26345	-1.20827	0.573447
Wu et al., 2017	Sucuoma pluton	98.9358	31.5263	SCM-10 12	235	0.0324997	0.00121168	0.282608	2.36248e-05	0.282602	-6.27051	-1.23502	0.835872
Wu et al., 2017	Sucuoma pluton	98.9358	31.5263	SCM-10 13	235	0.031282	0.00119224	0.282619	1.91566e-05	0.282614	-5.85784	-0.819114	0.677781
Wu et al., 2016	Ganluogou pluton	99.3374	31.5513	ZK-11N 01	214	0.017567	0.000591	0.282762	1.5e-05	0.28276	-0.813339	3.86156	0.530691
Wu et al., 2016	Ganluogou pluton	99.3374	31.5513	ZK-11N 02	214	0.046943	0.001503	0.282804	2e-05	0.282798	0.671889	5.21833	0.707588
Wu et al., 2016	Ganluogou pluton	99.3374	31.5513	ZK-11N 03	210	0.034876	0.001178	0.282775	1.4e-05	0.28277	-0.353626	4.15232	0.495307
Wu et al., 2016	Ganluogou pluton	99.3374	31.5513	ZK-11N 04	210	0.034146	0.001196	0.282788	1.8e-05	0.282783	0.106088	4.60974	0.636823
Wu et al., 2016	Ganluogou pluton	99.3374	31.5513	ZK-11N 05	211	0.036453	0.001175	0.282801	1.8e-05	0.282796	0.565801	5.0941	0.636825
Wu et al., 2016	Ganluogou pluton	99.3374	31.5513	ZK-11N 06	214	0.034718	0.001113	0.282757	1.3e-05	0.282753	-0.990152	3.61073	0.459932
Wu et al., 2016	Ganluogou pluton	99.3374	31.5513	ZK-11N 07	212	0.026287	0.000887	0.282762	1.7e-05	0.282758	-0.813339	3.77624	0.601447
Wu et al., 2016	Ganluogou pluton	99.3374	31.5513	ZK-11N 08	215	0.032739	0.001074	0.282772	1.5e-05	0.282768	-0.459713	4.16853	0.530692
Wu et al., 2016	Ganluogou pluton	99.3374	31.5513	ZK-11N 09	214	0.03306	0.001039	0.282777	1.4e-05	0.282773	-0.2829	4.3288	0.495311
Wu et al., 2016	Ganluogou pluton	99.3374	31.5513	ZK-11N 10	215	0.024489	0.000801	0.282763	1.7e-05	0.28276	-0.777976	3.88896	0.601451
Wu et al., 2016	Ganluogou pluton	99.3374	31.5513	ZK-11N 11	214	0.030638	0.001091	0.282788	2e-05	0.282784	0.106088	4.71061	0.707588
Wu et al., 2016	Ganluogou pluton	99.3374	31.5513	ZK-11N 12	215	0.024756	0.000798	0.282738	1.8e-05	0.282735	-1.66204	3.0049	0.63683
Wu et al., 2016	Ganluogou pluton	99.3374	31.5513	ZK-11N 13	213	0.022411	0.000719	0.282759	1.5e-05	0.282756	-0.919426	3.71548	0.53069
Wu et al., 2016	Ganluogou pluton	99.3374	31.5513	ZK-11N 14	213	0.038331	0.001209	0.282778	1.1e-05	0.282773	-0.247538	4.31861	0.389172
Wu et al., 2016	Ganluogou pluton	99.3413	31.5711	ZK-8N-01	208	0.021723	0.00064	0.2827	1.3e-05	0.282698	-3.00582	1.52994	0.459926
Wu et al., 2016	Ganluogou pluton	99.3413	31.5711	ZK-8N-02	208	0.057191	0.001726	0.282714	2e-05	0.282707	-2.51074	1.87575	0.707578
Wu et al., 2016	Ganluogou pluton	99.3413	31.5711	ZK-8N-03	206	0.032271	0.000923	0.282705	1.5e-05	0.282701	-2.829	1.62454	0.530681
Wu et al., 2016	Ganluogou pluton	99.3413	31.5711	ZK-8N-04	210	0.045573	0.001308	0.282728	1.6e-05	0.282723	-2.01567	2.47143	0.566065
Wu et al., 2016	Ganluogou pluton	99.3413	31.5711	ZK-8N-05	209	0.050564	0.001508	0.282717	1.8e-05	0.282711	-2.40465	2.03318	0.636822
Wu et al., 2016	Ganluogou pluton	99.3413	31.5711	ZK-8N-06	212	0.021866	0.000654	0.28269	1.3e-05	0.282687	-3.35944	1.26162	0.45993
Wu et al., 2016	Ganluogou pluton	99.3413	31.5711	ZK-8N-07	211	0.019884	0.000585	0.282709	1.2e-05	0.282707	-2.68755	1.92161	0.42455
Wu et al., 2016	Ganluogou pluton	99.3413	31.5711	ZK-8N-08	210	0.019019	0.000577	0.282693	1.5e-05	0.282691	-3.25336	1.33476	0.530686
Wu et al., 2016	Ganluogou pluton	99.3413	31.5711	ZK-8N-09	209	0.036509	0.001041	0.282724	1.2e-05	0.28272	-2.15712	2.34543	0.424548
Wu et al., 2016	Ganluogou pluton	99.3413	31.5711	ZK-8N-10	212	0.021416	0.000629	0.282701	1.8e-05	0.282699	-2.97045	1.6543	0.636826
Wu et al., 2016	Ganluogou pluton	99.3413	31.5711	ZK-8N-11	207	0.022103	0.00066	0.282698	1.2e-05	0.282695	-3.07654	1.43458	0.424546
Wu et al., 2016	Ganluogou pluton	99.3413	31.5711	ZK-8N-12	206	0.022918	0.00068	0.282709	1.5e-05	0.282706	-2.68755	1.79918	0.530681
Wu et al., 2016	Ganluogou pluton	99.3413	31.5711	ZK-8N-13	206	0.020157	0.000587	0.282702	1.2e-05	0.2827	-2.93509	1.56421	0.424545
Wu et al., 2017	Ajisenduo pluton	99.319	31.631	AJSD-1 1	224	0.0363511	0.00133183	0.282407	2.28414e-05	0.282401	-13.3785	-8.60064	0.808133
Wu et al., 2017	Ajisenduo pluton	99.319	31.631	AJSD-1 2	224	0.0428062	0.00155813	0.282424	1.61835e-05	0.282418	-12.7537	-8.0091	0.572575
Wu et al., 2017	Ajisenduo pluton	99.319	31.631	AJSD-1 3	224	0.0442773	0.00155601	0.282393	1.66371e-05	0.282386	-13.8696	-9.12524	0.588622
Wu et al., 2017	Ajisenduo pluton	99.319	31.631	AJSD-1 4	224	0.0344287	0.00125574	0.282434	1.58785e-05	0.282429	-12.4073	-7.61769	0.561784
Wu et al., 2017	Ajisenduo pluton	99.319	31.631	AJSD-1 5	224	0.0920525	0.0032154	0.282454	1.65996e-05	0.28244	-11.715	-7.21564	0.587296
Wu et al., 2017	Ajisenduo pluton	99.319	31.631	AJSD-1 6	224	0.0305133	0.00102057	0.2823	1.7033e-05	0.282296	-17.152	-12.3299	0.602631
Wu et al., 2017	Ajisenduo pluton	99.319	31.631	AJSD-1 7	224	0.0406813	0.00149029	0.282503	1.92047e-05	0.282496	-9.98916	-5.23315	0.679467
Wu et al., 2017	Ajisenduo pluton	99.319	31.631	AJSD-1 8	224	0.0451891	0.00155899	0.282419	1.71702e-05	0.282413	-12.9293	-8.18492	0.607483
Wu et al., 2017	Ajisenduo pluton	99.319	31.631	AJSD-1 9	224	0.0441821	0.00148739	0.282436	1.91968e-05	0.28243	-12.3422	-7.58694	0.679187
Wu et al., 2017	Ajisenduo pluton	99.319	31.631	AJSD-1 10	224	0.0494623	0.00168345	0.28242	1.86898e-05	0.282412	-12.925	-8.19908	0.661249
Wu et al., 2017	Ajisenduo pluton	99.319	31.631	AJSD-1 11	224	0.0366548	0.00126603	0.282484	2.00471e-05	0.282479	-10.6451	-5.85614	0.709271
Wu et al., 2017	Ajisenduo pluton	99.319	31.631	AJSD-1 12	224	0.0448256	0.00147216	0.282454	2.80054e-05	0.282448	-11.7108	-6.95293	0.990837
Wu et al., 2017	Jiaduocuo pluton	99.375	31.755	JDC-2 1	218	0.0511788	0.00172251	0.282599	1.76023e-05	0.282592	-6.58313	-1.98669	0.622762
Wu et al., 2017	Jiaduocuo pluton	99.375	31.755	JDC-2 2	218	0.0384653	0.00131392	0.282576	1.8222e-05	0.28257	-7.40272	-2.74772	0.644689
Wu et al., 2017	Jiaduocuo pluton	99.375	31.755	JDC-2 3	218	0.0367725	0.00128678	0.282587	2.15903e-05	0.282581	-7.01805	-2.35895	0.76386
Wu et al., 2017	Jiaduocuo pluton	99.375	31.755	JDC-2 4	218	0.0351997	0.00123221	0.282584	2.16404e-05	0.282579	-7.11397	-2.44704	0.76563
Wu et al., 2017	Jiaduocuo pluton	99.375	31.755	JDC-2 5	218	0.0346978	0.00123038	0.282612	2.05495e-05	0.282607	-6.10708	-1.4394	0.727033
Wu et al., 2017	Jiaduocuo pluton	99.375	31.755	JDC-2 6	218	0.0325541	0.00107138	0.282591	1.70891e-05	0.282587	-6.85303	-2.16276	0.604606
Wu et al., 2017	Jiaduocuo pluton	99.375	31.755	JDC-2 7	218	0.0457566	0.00155244	0.282574	1.76431e-05	0.282568	-7.44895	-2.82838	0.624206
Wu et al., 2017	Jiaduocuo pluton	99.375	31.755	JDC-2 8	218	0.0521714	0.00169403	0.28265	1.82178e-05	0.282643	-4.78409	-0.182669	0.64454
Wu et al., 2017	Jiaduocuo pluton	99.375	31.755	JDC-2 9	218	0.0694903	0.00244211	0.282562	2.62874e-05	0.282552	-7.90188	-3.40991	0.930039
Wu et al., 2017	Jiaduocuo pluton	99.375	31.755	JDC-2 10	218	0.0305659	0.00107157	0.282619	1.93596e-05	0.282614	-5.88351	-1.1928	0.684936
Wu et al., 2017	Jiaduocuo pluton	99.375	31.755	JDC-2 11	218	0.0459455	0.00148916	0.282613	2.34852e-05	0.282607	-6.06938	-1.43902	0.830898
Wu et al., 2017	Jiaduocuo pluton	99.375	31.755	JDC-2 12	218	0.0466128	0.00148134	0.282551	2.65353e-05	0.282545	-8.25851	-3.62808	0.938813
Wu et al., 2017	Jiaduocuo pluton	99.375	31.755	JDC-2 13	218	0.0327739	0.00104682	0.282614	2.11456e-05	0.28261	-6.03338	-1.33918	0.748123
Peng et al., 2014; Fang, 2017	Dongcuo pluton	99.9304	30.1988	YD61 01	217.9	0.021528	0.000844	0.282484	2.8e-05	0.282481	-10.6441	-5.92507	0.990631
Peng et al., 2014; Fang, 2017	Dongcuo pluton	99.9304	30.1988	YD61 02	216.6	0.024046	0.000933	0.282489	2e-05	0.282485	-10.4673	-5.78915	0.707592
Peng et al., 2014; Fang, 2017	Dongcuo pluton	99.9304	30.1988	YD61 03	215.1	0.024196	0.000963	0.282423	1.6e-05	0.282419	-12.8012	-8.16095	0.566072
Peng et al., 2014; Fang, 2017	Dongcuo pluton	99.9304	30.1988	YD61 04	216	0.020223	0.000804	0.282484	1.4e-05	0.282481	-10.6441	-5.9606	0.495314
Peng et al., 2014; Fang, 2017	Dongcuo pluton	99.9304	30.1988	YD61 05	218.3	0.028231	0.001133	0.282539	3e-05	0.282534	-8.69919	-4.01225	1.06139
Peng et al., 2014; Fang, 2017	Dongcuo pluton	99.9304	30.1988	YD61 06	215.7	0.014661	0.00062	0.282484	2e-05	0.282481	-10.6441	-5.94085	0.70759
Peng et al., 2014; Fang, 2017	Dongcuo pluton	99.9304	30.1988	YD61 07	215.4	0.021267	0.000892	0.282509	2.6e-05	0.282505	-9.76007	-5.1017	0.919867
Peng et al., 2014; Fang, 2017	Dongcuo pluton	99.9304	30.1988	YD61 08	215.5	0.020208	0.000799	0.282465	2.2e-05	0.282462	-11.316	-6.64297	0.778349
Peng et al., 2014; Fang, 2017	Dongcuo pluton	99.9304	30.1988	YD61 09	216.3	0.027408	0.001077	0.282506	2e-05	0.282502	-9.86615	-5.21481	0.707591
Peng et al., 2014; Fang, 2017	Dongcuo pluton	99.9304	30.1988	YD61 10	216.2	0.018758	0.000771	0.282473	1.2e-05	0.28247	-11.0331	-6.3407	0.424555
Peng et al., 2014; Fang, 2017	Dongcuo pluton	99.9304	30.1988	YD61 11	217.5	0.017778	0.000704	0.282482	1.6e-05	0.282479	-10.7149	-5.98436	0.566075
Peng et al., 2014; Fang, 2017	Dongcuo pluton	99.9304	30.1988	YD61 12	218.2	0.015834	0.000649	0.282503	2.4e-05	0.2825	-9.97224	-5.21818	0.849113
Peng et al., 2014; Fang, 2017	Dongcuo pluton	99.9304	30.1988	YD61 13	218.4	0.020589	0.000898	0.282536	1.2e-05	0.282532	-8.80528	-4.08227	0.424557
Peng et al., 2014; Fang, 2017	Dongcuo pluton	99.9304	30.1988	YD61 14	216.6	0.02298	0.000912	0.282538	1.8e-05	0.282534	-8.73455	-4.05254	0.636833
Peng et al., 2014; Fang, 2017	Dongcuo pluton	99.9304	30.1988	YD61 15	244.8	0.026249	0.00098	0.282554	1.8e-05	0.28255	-8.16875	-2.88616	0.636873
Peng et al., 2014; Fang, 2017	Dongcuo pluton	99.9304	30.1988	YD61 16	215.8	0.022509	0.000882	0.282519	1.8e-05	0.282515	-9.40644	-4.7378	0.636831
Peng et al., 2014; Fang, 2017	Dongcuo pluton	99.9304	30.1988	YD61 17	216.4	0.017608	0.000688	0.282491	1.8e-05	0.282488	-10.3966	-5.68763	0.636832
Peng et al., 2014; Fang, 2017	Dongcuo pluton	99.9304	30.1988	YD61 18	238.7	0.023399	0.000935	0.282593	1.8e-05	0.282589	-6.78961	-1.63117	0.636864
Peng et al., 2014; Fang, 2017	Dongcuo pluton	99.9304	30.1988	YD61 19	216.7	0.01802	0.000732	0.28254	1.4e-05	0.282537	-8.66383	-3.9538	0.495314
Peng et al., 2014; Fang, 2017	Dongcuo pluton	99.9304	30.1988	YD61 20	218.5	0.015199	0.000627	0.282476	2e-05	0.282473	-10.927	-6.16369	0.707595
Peng et al., 2014; Fang, 2017	Dongcuo pluton	100.082	29.3172	SJ206 01	218	0.023735	0.001049	0.282549	7.6e-05	0.282545	-8.34556	-3.65279	2.68886
Peng et al., 2014; Fang, 2017	Dongcuo pluton	100.082	29.3172	SJ206 02	215.6	0.021573	0.000961	0.282375	0.000104	0.282371	-14.4986	-9.84806	3.67947
Peng et al., 2014; Fang, 2017	Dongcuo pluton	100.082	29.3172	SJ206 03	208.2	0.026156	0.001147	0.282448	9.2e-05	0.282444	-11.9172	-7.45104	3.25486
Peng et al., 2014; Fang, 2017	Dongcuo pluton	100.082	29.3172	SJ206 04	210.7	0.026833	0.001163	0.282468	5.4e-05	0.282463	-11.2099	-6.69193	1.91047
Peng et al., 2014; Fang, 2017	Dongcuo pluton	100.082	29.3172	SJ206 05	217.6	0.025149	0.001106	0.282529	7.6e-05	0.282524	-9.05281	-4.37723	2.68885
Peng et al., 2014; Fang, 2017	Dongcuo pluton	100.082	29.3172	SJ206 06	217.5	0.028492	0.001221	0.282505	0.000104	0.2825	-9.90152	-5.24505	3.67948
Peng et al., 2014; Fang, 2017	Dongcuo pluton	100.082	29.3172	SJ206 07	209.1	0.028637	0.001213	0.282073	0.000418	0.282068	-25.1781	-20.7079	14.7884
Peng et al., 2014; Fang, 2017	Dongcuo pluton	100.082	29.3172	SJ206 08	211.3	0.027056	0.00121	0.282483	9.4e-05	0.282478	-10.6795	-6.15491	3.32564
Peng et al., 2014; Fang, 2017	Dongcuo pluton	100.082	29.3172	SJ206 09	210.5	0.015626	0.000739	0.282478	9e-05	0.282475	-10.8563	-6.28337	3.18412
Peng et al., 2014; Fang, 2017	Dongcuo pluton	100.082	29.3172	SJ206 10	212.5	0.017137	0.000833	0.28249	5.6e-05	0.282487	-10.432	-5.82848	1.98124
Peng et al., 2014; Fang, 2017	Dongcuo pluton	100.082	29.3172	SJ206 11	211.7	0.026951	0.001163	0.282431	0.000112	0.282426	-12.5183	-7.97946	3.96247
Peng et al., 2014; Fang, 2017	Dongcuo pluton	100.082	29.3172	SJ206 12	215.4	0.022042	0.00101	0.282228	0.000272	0.282224	-19.6969	-15.0602	9.62322
Peng et al., 2014; Fang, 2017	Dongcuo pluton	100.082	29.3172	SJ206 13	211.3	0.026548	0.001151	0.28243	8e-05	0.282425	-12.5537	-8.02176	2.83033
Peng et al., 2014; Fang, 2017	Dongcuo pluton	100.082	29.3172	SJ206 14	210.8	0.019292	0.000902	0.282308	0.000622	0.282304	-16.8679	-12.314	22.0058
Peng et al., 2014; Fang, 2017	Dongcuo pluton	100.082	29.3172	SJ206 15	218.4	0.025447	0.001154	0.282335	0.000114	0.28233	-15.9131	-11.2306	4.03329
Peng et al., 2014; Fang, 2017	Dongcuo pluton	100.082	29.3172	SJ206 16	216.5	0.014513	0.000701	0.282231	0.000174	0.282228	-19.5909	-14.886	6.15605
Peng et al., 2014; Fang, 2017	Dongcuo pluton	100.082	29.3172	SJ206 17	215.8	0.015664	0.000718	0.282398	0.000102	0.282395	-13.6853	-8.9953	3.60871
Peng et al., 2014; Fang, 2017	Dongcuo pluton	100.082	29.3172	SJ206 18	216.7	0.031957	0.001342	0.282439	9e-05	0.282434	-12.2354	-7.61463	3.18416
Peng et al., 2014; Fang, 2017	Dongcuo pluton	100.082	29.3172	SJ206 19	218.8	0.018187	0.000844	0.282448	7e-05	0.282445	-11.9172	-7.1792	2.47658
Peng et al., 2014; Fang, 2017	Dongcuo pluton	100.082	29.3172	SJ206 20	217.1	0.023368	0.001029	0.282382	0.000104	0.282378	-14.2511	-9.57774	3.67948
Peng et al., 2014; Fang, 2017	Dongcuo pluton	100.082	29.3172	SJ206 21	212.8	0.019104	0.000843	0.282362	0.000142	0.282359	-14.9584	-10.3519	5.02386
Peng et al., 2014; Fang, 2017	Dongcuo pluton	100.082	29.3172	SJ206 22	211.7	0.026275	0.001136	0.282392	7.2e-05	0.282388	-13.8975	-9.35547	2.5473
Peng et al., 2014; Fang, 2017	Dongcuo pluton	100.077	29.3106	SJ209 01	221.2	0.021846	0.000914	0.282496	1.8e-05	0.282492	-10.2198	-5.43911	0.636839
Peng et al., 2014; Fang, 2017	Dongcuo pluton	100.077	29.3106	SJ209 02	220	0.018869	0.000772	0.282507	2.4e-05	0.282504	-9.83079	-5.05525	0.849117
Peng et al., 2014; Fang, 2017	Dongcuo pluton	100.077	29.3106	SJ209 03	220	0.029732	0.00125	0.28255	2.4e-05	0.282545	-8.3102	-3.60352	0.849117
Peng et al., 2014; Fang, 2017	Dongcuo pluton	100.077	29.3106	SJ209 04	230	0.020131	0.000849	0.282494	1.8e-05	0.28249	-10.2905	-5.30927	0.636852
Peng et al., 2014; Fang, 2017	Dongcuo pluton	100.077	29.3106	SJ209 05	224.8	0.025123	0.001067	0.282535	2e-05	0.282531	-8.84064	-4.00404	0.707605
Peng et al., 2014; Fang, 2017	Dongcuo pluton	100.077	29.3106	SJ209 06	224.7	0.01878	0.00081	0.282519	2.4e-05	0.282516	-9.40644	-4.53405	0.849125
Peng et al., 2014; Fang, 2017	Dongcuo pluton	100.077	29.3106	SJ209 07	221.8	0.017609	0.000707	0.282494	3.4e-05	0.282491	-10.2905	-5.46647	1.20292
Peng et al., 2014; Fang, 2017	Dongcuo pluton	100.077	29.3106	SJ209 08	229.6	0.019698	0.000825	0.282477	2.8e-05	0.282473	-10.8917	-5.91578	0.990657
Peng et al., 2014; Fang, 2017	Dongcuo pluton	100.077	29.3106	SJ209 09	222.6	0.022973	0.000948	0.282495	1.8e-05	0.282491	-10.2551	-5.44916	0.636841
Peng et al., 2014; Fang, 2017	Dongcuo pluton	100.077	29.3106	SJ209 10	221.8	0.027003	0.001121	0.282505	1.8e-05	0.2825	-9.90152	-5.13807	0.63684
Peng et al., 2014; Fang, 2017	Dongcuo pluton	100.077	29.3106	SJ209 11	220.6	0.030933	0.001267	0.282459	3.2e-05	0.282454	-11.5282	-6.81271	1.13216
Peng et al., 2014; Fang, 2017	Dongcuo pluton	100.077	29.3106	SJ209 12	251.2	0.028048	0.001184	0.282527	1.8e-05	0.282521	-9.12354	-3.7369	0.636882
Peng et al., 2014; Fang, 2017	Dongcuo pluton	100.077	29.3106	SJ209 13	225.5	0.01844	0.000736	0.282458	2.4e-05	0.282455	-11.5636	-6.66381	0.849127
Peng et al., 2014; Fang, 2017	Dongcuo pluton	100.077	29.3106	SJ209 14	225.1	0.033523	0.001366	0.282438	2.4e-05	0.282432	-12.2708	-7.474	0.849126
Peng et al., 2014; Fang, 2017	Dongcuo pluton	100.077	29.3106	SJ209 15	246.9	0.024757	0.001036	0.282543	2e-05	0.282538	-8.55774	-3.23907	0.70764
Peng et al., 2014; Fang, 2017	Dongcuo pluton	100.077	29.3106	SJ209 16	255	0.03977	0.001601	0.282489	4e-05	0.282481	-10.4673	-5.07013	1.4153
Peng et al., 2014; Fang, 2017	Dongcuo pluton	100.351	29.6419	YD65 01	215.7	0.01934	0.000743	0.282119	1.6e-05	0.282116	-23.5515	-18.8719	0.566072
Peng et al., 2014; Fang, 2017	Dongcuo pluton	100.351	29.6419	YD65 02	218	0.019215	0.000817	0.282308	2e-05	0.282305	-16.8679	-12.1458	0.707594
Peng et al., 2014; Fang, 2017	Dongcuo pluton	100.351	29.6419	YD65 03	219.1	0.023762	0.001004	0.282376	2.4e-05	0.282372	-14.4633	-9.74323	0.849115
Peng et al., 2014; Fang, 2017	Dongcuo pluton	100.351	29.6419	YD65 04	216.2	0.027284	0.001069	0.282385	1.8e-05	0.282381	-14.145	-9.49675	0.636832
Peng et al., 2014; Fang, 2017	Dongcuo pluton	100.351	29.6419	YD65 05	218.7	0.023717	0.000896	0.282405	1.6e-05	0.282401	-13.4378	-8.71023	0.566076
Peng et al., 2014; Fang, 2017	Dongcuo pluton	100.351	29.6419	YD65 06	217	0.030781	0.001201	0.282432	2.4e-05	0.282427	-12.483	-7.83562	0.849111
Peng et al., 2014; Fang, 2017	Dongcuo pluton	100.351	29.6419	YD65 07	217.1	0.019237	0.000835	0.2824	1.8e-05	0.282397	-13.6146	-8.91303	0.636833
Peng et al., 2014; Fang, 2017	Dongcuo pluton	100.351	29.6419	YD65 08	427.5	0.02128	0.000903	0.282313	1.6e-05	0.282306	-16.6911	-7.43276	0.56634
Peng et al., 2014; Fang, 2017	Dongcuo pluton	100.351	29.6419	YD65 09	296.3	0.016372	0.000645	0.28195	2.2e-05	0.281946	-29.5277	-23.0783	0.778489
Peng et al., 2014; Fang, 2017	Dongcuo pluton	100.351	29.6419	YD65 10	215.1	0.018954	0.000763	0.282145	1.4e-05	0.282142	-22.632	-17.968	0.495313
Peng et al., 2014; Fang, 2017	Dongcuo pluton	100.351	29.6419	YD65 11	215.7	0.029117	0.001146	0.282357	3e-05	0.282352	-15.1352	-10.5091	1.06139
Peng et al., 2014; Fang, 2017	Dongcuo pluton	100.351	29.6419	YD65 12	215.9	0.018838	0.000765	0.28241	2.2e-05	0.282407	-13.261	-8.57529	0.77835
Peng et al., 2014; Fang, 2017	Dongcuo pluton	100.351	29.6419	YD65 13	216.6	0.030584	0.001187	0.282334	3.6e-05	0.282329	-15.9485	-11.3094	1.27367
Peng et al., 2014; Fang, 2017	Dongcuo pluton	100.351	29.6419	YD65 14	216.6	0.027528	0.001083	0.282374	2.4e-05	0.28237	-14.534	-9.87931	0.84911
Peng et al., 2014; Fang, 2017	Dongcuo pluton	100.351	29.6419	YD65 15	320.1	0.020819	0.000863	0.282379	2.2e-05	0.282374	-14.3572	-7.42326	0.778531
Peng et al., 2014; Fang, 2017	Dongcuo pluton	100.351	29.6419	YD65 16	218.5	0.024751	0.001035	0.282412	1.6e-05	0.282408	-13.1902	-8.487	0.566076
Peng et al., 2014; Fang, 2017	Dongcuo pluton	100.351	29.6419	YD65 17	215.4	0.026146	0.001003	0.282428	2.4e-05	0.282424	-12.6244	-7.98326	0.849108
Peng et al., 2014; Fang, 2017	Dongcuo pluton	100.351	29.6419	YD65 18	215.6	0.029723	0.001285	0.282522	3.6e-05	0.282517	-9.30035	-4.69351	1.27366
Peng et al., 2014; Fang, 2017	Dongcuo pluton	100.351	29.6419	YD65 19	215.3	0.036813	0.001474	0.282399	2.4e-05	0.282393	-13.6499	-9.07855	0.849108
Peng et al., 2014; Fang, 2017	Dongcuo pluton	100.351	29.6419	YD65 20	299.7	0.021538	0.000869	0.282384	1.8e-05	0.282379	-14.1804	-7.69095	0.636951
He et al., 2013	Dongcuo pluton	100.155	29.3942	DC0910 01	219	0.06399	0.001255	0.282485	1.5e-05	0.28248	-10.6088	-5.92538	0.530697
He et al., 2013	Dongcuo pluton	100.155	29.3942	DC0910 02	220	0.101626	0.001876	0.282492	1.3e-05	0.282484	-10.3612	-5.74671	0.459938
He et al., 2013	Dongcuo pluton	100.155	29.3942	DC0910 03	214	0.064996	0.001267	0.282494	1.3e-05	0.282489	-10.2905	-5.71586	0.459932
He et al., 2013	Dongcuo pluton	100.155	29.3942	DC0910 04	217	0.092475	0.001997	0.282505	1.4e-05	0.282497	-9.90152	-5.36724	0.495315
He et al., 2013	Dongcuo pluton	100.155	29.3942	DC0910 05	214	0.048613	0.001037	0.282478	1.8e-05	0.282474	-10.8563	-6.24935	0.636829
He et al., 2013	Dongcuo pluton	100.155	29.3942	DC0910 06	211	0.093895	0.001814	0.282492	1.4e-05	0.282485	-10.3612	-5.92729	0.495308
He et al., 2013	Dongcuo pluton	100.155	29.3942	DC0910 07	217	0.051331	0.001007	0.282496	1e-05	0.282492	-10.2198	-5.54346	0.353796
He et al., 2013	Dongcuo pluton	100.155	29.3942	DC0910 08	215	0.114288	0.002107	0.282488	1.4e-05	0.28248	-10.5027	-6.02624	0.495312
He et al., 2013	Dongcuo pluton	100.155	29.3942	DC0910 09	213	0.064689	0.001252	0.282492	1.7e-05	0.282487	-10.3612	-5.80593	0.601448
He et al., 2013	Dongcuo pluton	100.155	29.3942	DC0910 10	215	0.055626	0.001129	0.282494	1.2e-05	0.282489	-10.2905	-5.67479	0.424554
He et al., 2013	Dongcuo pluton	100.155	29.3942	DC0910 11	219	0.038863	0.000816	0.282479	1.5e-05	0.282476	-10.8209	-6.07402	0.530697
He et al., 2013	Dongcuo pluton	100.155	29.3942	DC0910 12	215	0.080578	0.001501	0.282489	1.2e-05	0.282483	-10.4673	-5.90462	0.424554
He et al., 2013	Dongcuo pluton	100.155	29.3942	DC0910 13	221	0.056112	0.001117	0.282488	1.7e-05	0.282483	-10.5027	-5.75617	0.601459
He et al., 2013	Dongcuo pluton	100.155	29.3942	DC0910 14	212	0.058447	0.001171	0.282427	1.1e-05	0.282422	-12.6598	-8.11565	0.389171
He et al., 2013	Dongcuo pluton	100.155	29.3942	DC0910 15	215	0.055747	0.001129	0.282426	1.3e-05	0.282421	-12.6952	-8.08059	0.459933
He et al., 2013	Dongcuo pluton	100.155	29.3942	DC0910 16	212	0.049725	0.000987	0.282431	1.2e-05	0.282427	-12.5183	-7.94832	0.424551
He et al., 2013	Dongcuo pluton	100.155	29.3942	DC0910 17	209	0.078764	0.001561	0.282435	1.3e-05	0.282429	-12.3769	-7.95103	0.459927
He et al., 2013	Dongcuo pluton	100.155	29.3942	DC0910 18	215	0.088674	0.001624	0.282438	1.2e-05	0.282431	-12.2708	-7.72648	0.424554
He et al., 2013	Dongcuo pluton	100.155	29.3942	DC0910 19	214	0.086557	0.001625	0.282372	1.6e-05	0.282365	-14.6047	-10.0828	0.56607
He et al., 2013	Dongcuo pluton	100.155	29.3942	DC0910 20	215	0.066135	0.001302	0.282365	1.6e-05	0.28236	-14.8523	-10.2634	0.566071
He et al., 2013	Dongcuo pluton	100.155	29.3942	DC0910 21	217	0.066647	0.001342	0.282561	1.3e-05	0.282556	-7.92121	-3.2919	0.459935
He et al., 2013	Dongcuo pluton	100.077	29.3043	DC0922 01	216	0.117734	0.002427	0.282555	1.1e-05	0.282545	-8.13339	-3.68068	0.389175
He et al., 2013	Dongcuo pluton	100.077	29.3043	DC0922 02	219	0.064755	0.001358	0.282556	1.3e-05	0.28255	-8.09803	-3.42835	0.459937
He et al., 2013	Dongcuo pluton	100.077	29.3043	DC0922 03	216	0.07294	0.001534	0.28256	1.6e-05	0.282554	-7.95657	-3.37612	0.566073
He et al., 2013	Dongcuo pluton	100.077	29.3043	DC0922 04	216	0.073514	0.001436	0.282557	1.8e-05	0.282551	-8.06266	-3.46825	0.636832
He et al., 2013	Dongcuo pluton	100.077	29.3043	DC0922 05	219	0.148936	0.00284	0.28259	1.5e-05	0.282578	-6.8957	-2.44026	0.530697
He et al., 2013	Dongcuo pluton	100.077	29.3043	DC0922 06	215	0.088537	0.00185	0.282574	1.4e-05	0.282567	-7.4615	-2.94703	0.495312
He et al., 2013	Dongcuo pluton	100.077	29.3043	DC0922 07	217	0.077072	0.001606	0.282582	1.2e-05	0.282575	-7.1786	-2.58685	0.424555
He et al., 2013	Dongcuo pluton	100.077	29.3043	DC0922 08	219	0.092375	0.001811	0.282577	9e-06	0.28257	-7.35541	-2.75104	0.318418
He et al., 2013	Dongcuo pluton	100.077	29.3043	DC0922 09	217	0.068509	0.001411	0.282555	1.4e-05	0.282549	-8.13339	-3.51409	0.495315
He et al., 2013	Dongcuo pluton	100.077	29.3043	DC0922 10	216	0.201834	0.003973	0.28256	2.7e-05	0.282544	-7.95657	-3.72481	0.955248
He et al., 2013	Dongcuo pluton	100.077	29.3043	DC0922 11	217	0.041139	0.000854	0.282495	1.5e-05	0.282492	-10.2551	-5.55687	0.530694
He et al., 2013	Dongcuo pluton	100.077	29.3043	DC0922 12	216	0.070641	0.001454	0.282502	1.4e-05	0.282496	-10.0076	-5.41669	0.495314
He et al., 2013	Dongcuo pluton	100.077	29.3043	DC0922 13	216	0.081543	0.001625	0.282507	1.2e-05	0.2825	-9.83079	-5.26424	0.424554
He et al., 2013	Dongcuo pluton	100.077	29.3043	DC0922 14	215	0.049705	0.001065	0.282491	1.7e-05	0.282487	-10.3966	-5.77182	0.601451
He et al., 2013	Dongcuo pluton	100.077	29.3043	DC0922 15	218	0.052906	0.00107	0.282499	1.5e-05	0.282495	-10.1137	-5.42481	0.530695
He et al., 2013	Dongcuo pluton	100.077	29.3043	DC0922 16	216	0.086651	0.00179	0.282484	1.5e-05	0.282477	-10.6441	-6.10156	0.530693
He et al., 2013	Dongcuo pluton	100.077	29.3043	DC0922 17	216	0.110247	0.002237	0.282625	1.5e-05	0.282616	-5.65801	-1.17695	0.530693
He et al., 2013	Dongcuo pluton	100.077	29.3043	DC0922 18	212	0.065831	0.00134	0.28263	1e-05	0.282625	-5.4812	-0.957383	0.353792
Wu et al., 2017	Dongcuo pluton	100.144	29.3758	HZS-8 1	222	0.0287894	0.00097665	0.282518	1.74364e-05	0.282514	-9.43612	-4.64693	0.616902
Wu et al., 2017	Dongcuo pluton	100.144	29.3758	HZS-8 2	222	0.0503453	0.00161523	0.282463	2.33934e-05	0.282457	-11.3736	-6.67916	0.827658
Wu et al., 2017	Dongcuo pluton	100.144	29.3758	HZS-8 3	222	0.0455646	0.0015039	0.282527	1.52951e-05	0.282521	-9.11495	-4.40308	0.541139
Wu et al., 2017	Dongcuo pluton	100.144	29.3758	HZS-8 4	222	0.0441445	0.00163827	0.282409	1.86182e-05	0.282402	-13.2963	-8.60623	0.658713
Wu et al., 2017	Dongcuo pluton	100.144	29.3758	HZS-8 5	222	0.0468215	0.00158401	0.2826	2.00457e-05	0.282594	-6.53191	-1.83054	0.709219
Wu et al., 2017	Dongcuo pluton	100.144	29.3758	HZS-8 6	222	0.0339381	0.00115819	0.282538	1.58567e-05	0.282533	-8.73062	-3.96776	0.561009
Wu et al., 2017	Dongcuo pluton	100.144	29.3758	HZS-8 7	222	0.0266275	0.000925542	0.282522	1.82205e-05	0.282518	-9.31021	-4.51345	0.644643
Wu et al., 2017	Dongcuo pluton	100.144	29.3758	HZS-8 8	222	0.0317492	0.00107094	0.282513	1.9131e-05	0.282508	-9.62744	-4.8522	0.676857
Wu et al., 2017	Dongcuo pluton	100.144	29.3758	HZS-8 9	222	0.0335572	0.00112808	0.282531	1.81043e-05	0.282527	-8.96569	-4.19852	0.640531
Wu et al., 2017	Dongcuo pluton	100.144	29.3758	HZS-8 10	222	0.0373165	0.00125895	0.282507	1.51443e-05	0.282501	-9.84779	-5.10029	0.535804
Wu et al., 2017	Dongcuo pluton	100.144	29.3758	HZS-8 11	222	0.0239019	0.000815685	0.282595	1.7592e-05	0.282592	-6.72217	-1.90799	0.622405
Wu et al., 2017	Dongcuo pluton	100.144	29.3758	HZS-8 12	222	0.0370857	0.00126147	0.28255	1.49933e-05	0.282545	-8.30089	-3.553	0.530463
Wu et al., 2017	Dongcuo pluton	100.144	29.3758	HZS-8 13	222	0.0253497	0.000891834	0.282521	1.34248e-05	0.282517	-9.35293	-4.55123	0.47497
Reid et al., 2007	Dongcuo pluton	100.19	29.46	YA05 2	217	0.067184	0.00193	0.28254	1.4e-05	0.282532	-8.66383	-4.11933	0.495315
Reid et al., 2007	Dongcuo pluton	100.19	29.46	YA05 3	218	0.032197	0.00094	0.282447	1.3e-05	0.282443	-11.9525	-7.2458	0.459936
Reid et al., 2007	Dongcuo pluton	100.19	29.46	YA05 5	217	0.039364	0.001094	0.282501	1.9e-05	0.282497	-10.043	-5.37906	0.672213
Reid et al., 2007	Dongcuo pluton	100.19	29.46	YA05 6	214	0.032548	0.000936	0.282623	1.9e-05	0.282619	-5.72873	-1.10503	0.672208
Reid et al., 2007	Dongcuo pluton	100.19	29.46	YA05 7	218	0.03362	0.000956	0.282462	2.3e-05	0.282458	-11.4221	-6.71741	0.813733
Reid et al., 2007	Dongcuo pluton	100.19	29.46	YA05 8	216	0.037391	0.001095	0.282503	9e-06	0.282499	-9.97224	-5.32999	0.318416
Reid et al., 2007	Dongcuo pluton	100.19	29.46	YA05 10	213	0.044732	0.001275	0.28245	1.9e-05	0.282445	-11.8465	-7.2951	0.672207
Reid et al., 2007	Dongcuo pluton	100.19	29.46	YA05 12	219	0.081658	0.002252	0.282612	1.4e-05	0.282603	-6.11772	-1.57667	0.495317
Reid et al., 2007	Dongcuo pluton	100.19	29.46	YA05 13	216	0.054145	0.001528	0.28254	1.3e-05	0.282534	-8.66383	-4.08285	0.459934
Reid et al., 2007	Dongcuo pluton	100.19	29.46	YA05 15	213	0.030888	0.000942	0.282471	1.8e-05	0.282467	-11.1038	-6.50519	0.636827
Reid et al., 2007	Dongcuo pluton	100.19	29.46	YA05 19	215	0.055514	0.001694	0.282516	1.3e-05	0.282509	-9.51253	-4.97684	0.459933
Reid et al., 2007	Dongcuo pluton	100.19	29.46	YA05 20	218	0.027162	0.000814	0.282477	9e-06	0.282474	-10.8917	-6.16622	0.318417
Wang et al., 2016	Dongcuo pluton	99.9634	30.1853	1007-6 01	217.4	0.03086	0.000938	0.282531	1.9e-05	0.282527	-8.98209	-4.2866	0.672213
Wang et al., 2016	Dongcuo pluton	99.9634	30.1853	1007-6 02	218.6	0.027944	0.000868	0.282563	1.8e-05	0.282559	-7.85049	-3.11834	0.636835
Wang et al., 2016	Dongcuo pluton	99.9634	30.1853	1007-6 03	214.6	0.028733	0.000874	0.282548	2e-05	0.282544	-8.38093	-3.73669	0.707589
Wang et al., 2016	Dongcuo pluton	99.9634	30.1853	1007-6 04	217.4	0.043877	0.001365	0.28253	2e-05	0.282524	-9.01745	-4.38343	0.707593
Wang et al., 2016	Dongcuo pluton	99.9634	30.1853	1007-6 05	216.6	0.029026	0.000884	0.282528	1.9e-05	0.282524	-9.08818	-4.40232	0.672212
Wang et al., 2016	Dongcuo pluton	99.9634	30.1853	1007-6 06	213.2	0.03876	0.00116	0.282558	1.9e-05	0.282553	-8.0273	-3.45363	0.672207
Wang et al., 2016	Dongcuo pluton	99.9634	30.1853	1007-6 07	216.1	0.030205	0.000897	0.282573	1.8e-05	0.282569	-7.49686	-2.82295	0.636832
Wang et al., 2016	Dongcuo pluton	99.9634	30.1853	1007-6 08	217.8	0.031311	0.000957	0.282497	2e-05	0.282493	-10.1844	-5.48359	0.707594
Wang et al., 2016	Dongcuo pluton	99.9634	30.1853	1007-6 09	215.9	0.025337	0.000764	0.282443	2.2e-05	0.28244	-12.094	-7.40762	0.77835
Wang et al., 2016	Dongcuo pluton	99.9634	30.1853	1007-6 10	217.2	0.038022	0.001168	0.282544	2.3e-05	0.282539	-8.52238	-3.86406	0.813732
Wang et al., 2016	Dongcuo pluton	99.9634	30.1853	1007-6 11	220.4	0.043532	0.001317	0.282535	2.1e-05	0.28253	-8.84064	-4.13541	0.742978
Wang et al., 2016	Dongcuo pluton	99.9634	30.1853	1007-6 12	218.4	0.03211	0.000968	0.282579	2.2e-05	0.282575	-7.28469	-2.57106	0.778354
Wang et al., 2016	Dongcuo pluton	99.9634	30.1853	1007-6 13	216.8	0.043443	0.001321	0.282493	2.1e-05	0.282488	-10.3259	-5.69898	0.742972
Wang et al., 2016	Dongcuo pluton	99.9634	30.1853	1007-6 14	222.2	0.02716	0.00082	0.282563	2e-05	0.28256	-7.85049	-3.03315	0.707601
Wang et al., 2016	Dongcuo pluton	99.9634	30.1853	1007-6 15	219.4	0.046236	0.001377	0.282441	2.3e-05	0.282435	-12.1647	-7.49123	0.813736
Wang et al., 2016	Dongcuo pluton	99.9634	30.1853	1007-6 16	216.6	0.034279	0.001	0.282584	2e-05	0.28258	-7.10787	-2.4377	0.707592
Wang et al., 2016	Dongcuo pluton	99.9634	30.1853	1007-6 17	221.7	0.040072	0.001186	0.282535	2e-05	0.28253	-8.84064	-4.08837	0.7076
Wang et al., 2016	Dongcuo pluton	99.9634	30.1853	1007-6 18	220.7	0.047543	0.001436	0.282492	1.9e-05	0.282486	-10.3612	-5.66771	0.672218
Wang et al., 2016	Dongcuo pluton	99.9634	30.1853	1007-6 19	219.4	0.036177	0.001075	0.282534	1.8e-05	0.28253	-8.876	-4.15705	0.636837
Wang et al., 2016	Dongcuo pluton	99.9634	30.1853	1007-6 20	219.7	0.029849	0.0009	0.282527	2.4e-05	0.282523	-9.12354	-4.3728	0.849116
Wang et al., 2016	Dongcuo pluton	99.9634	30.1853	1007-6 21	218.7	0.034577	0.001027	0.282492	2.1e-05	0.282488	-10.3612	-5.65115	0.742975
Wang et al., 2016	Dongcuo pluton	99.9634	30.1853	1007-6 22	229.1	0.202868	0.005906	0.282652	2.3e-05	0.282627	-4.70322	-0.505618	0.813753
Wang et al., 2016	Dongcuo pluton	99.9634	30.1853	1007-6 23	218.7	0.027842	0.000821	0.282548	2.2e-05	0.282545	-8.38093	-3.64006	0.778355
Wang et al., 2016	Dongcuo pluton	99.9634	30.1853	1007-6 24	214	0.056936	0.001698	0.282561	1.9e-05	0.282554	-7.92121	-3.40648	0.672208
Wang et al., 2016	Dongcuo pluton	99.9634	30.1853	1007-6 25	216.7	0.032399	0.000971	0.282454	2.2e-05	0.28245	-11.705	-7.03072	0.778351
Wang et al., 2016	Dongcuo pluton	99.9634	30.1853	1007-6 26	217.9	0.032374	0.000953	0.282532	1.9e-05	0.282528	-8.94673	-4.24256	0.672214
Wang et al., 2016	Dongcuo pluton	99.9634	30.1853	1007-6 27	217.5	0.028749	0.000877	0.282583	2e-05	0.282579	-7.14324	-2.43592	0.707593
Wang et al., 2016	Dongcuo pluton	99.9634	30.1853	1007-6 28	216	0.029206	0.000876	0.282537	1.9e-05	0.282533	-8.76991	-4.09578	0.672211
Wang et al., 2016	Dongcuo pluton	99.9634	30.1853	1007-6 29	218.7	0.039004	0.001131	0.282566	2.1e-05	0.282561	-7.7444	-3.0481	0.742975
He et al., 2013	Maxionggou pluton	99.9626	29.1418	XC0903 01	221	0.163659	0.003318	0.282745	1.6e-05	0.282731	-1.4145	3.0145	0.566079
He et al., 2013	Maxionggou pluton	99.9626	29.1418	XC0903 02	218	0.223953	0.004111	0.282741	1.7e-05	0.282724	-1.55595	2.69829	0.601455
He et al., 2013	Maxionggou pluton	99.9626	29.1418	XC0903 03	220	0.100326	0.002057	0.282742	1.1e-05	0.282734	-1.52059	3.0719	0.389178
He et al., 2013	Maxionggou pluton	99.9626	29.1418	XC0903 04	224	0.045477	0.001016	0.282715	1.5e-05	0.282711	-2.47538	2.3547	0.530703
He et al., 2013	Maxionggou pluton	99.9626	29.1418	XC0903 05	208	0.153311	0.002871	0.282736	1.9e-05	0.282725	-1.73277	2.49647	0.672199
He et al., 2013	Maxionggou pluton	99.9626	29.1418	XC0903 06	211	0.259258	0.005119	0.282717	1.5e-05	0.282697	-2.40465	1.57149	0.530687
He et al., 2013	Maxionggou pluton	99.9626	29.1418	XC0903 07	216	0.140968	0.003017	0.282711	1.5e-05	0.282699	-2.61683	1.75418	0.530693
He et al., 2013	Maxionggou pluton	99.9626	29.1418	XC0903 08	216	0.134515	0.002607	0.282714	1.3e-05	0.282703	-2.51074	1.91893	0.459934
He et al., 2013	Maxionggou pluton	99.9626	29.1418	XC0903 09	226	0.173455	0.003337	0.2827	1.7e-05	0.282686	-3.00582	1.52001	0.601466
He et al., 2013	Maxionggou pluton	99.9626	29.1418	XC0903 10	211	0.094037	0.001851	0.282703	1.2e-05	0.282696	-2.89973	1.53254	0.42455
He et al., 2013	Maxionggou pluton	99.9626	29.1418	XC0903 11	212	0.152157	0.002745	0.282716	1.4e-05	0.282705	-2.44002	1.88809	0.495309
He et al., 2013	Maxionggou pluton	99.9626	29.1418	XC0903 12	211	0.07776	0.00151	0.282661	1.9e-05	0.282655	-4.38496	0.0942397	0.672204
He et al., 2013	Maxionggou pluton	99.9626	29.1418	XC0903 13	219	0.055797	0.001167	0.282664	1.6e-05	0.282659	-4.27887	0.420356	0.566076
He et al., 2013	Maxionggou pluton	99.9626	29.1418	XC0903 14	213	0.116399	0.002446	0.28268	1.3e-05	0.28267	-3.71307	0.677057	0.459931
He et al., 2013	Maxionggou pluton	99.9626	29.1418	XC0903 15	221	0.065648	0.001327	0.282662	1.6e-05	0.282657	-4.34959	0.369216	0.566079
He et al., 2013	Maxionggou pluton	99.9626	29.1418	XC0903 16	210	0.098751	0.001867	0.282669	1.7e-05	0.282662	-4.10206	0.306375	0.601444
Peng et al., 2014; Fang, 2017	Maxionggou pluton	99.9613	29.1401	SJ199 01	244.6	0.10719	0.004346	0.282734	2.2e-05	0.282714	-1.80349	2.93312	0.7784
Peng et al., 2014; Fang, 2017	Maxionggou pluton	99.9613	29.1401	SJ199 02	226.1	0.067433	0.00264	0.282651	3e-05	0.28264	-4.73858	-0.107299	1.06141
Peng et al., 2014; Fang, 2017	Maxionggou pluton	99.9613	29.1401	SJ199 03	244.1	0.036955	0.001527	0.282634	2.4e-05	0.282627	-5.33975	-0.15917	0.849162
Peng et al., 2014; Fang, 2017	Maxionggou pluton	99.9613	29.1401	SJ199 04	217	0.068617	0.002696	0.282665	2.4e-05	0.282654	-4.24351	0.193106	0.849111
Peng et al., 2014; Fang, 2017	Maxionggou pluton	99.9613	29.1401	SJ199 05	215.7	0.035273	0.001381	0.282642	2.4e-05	0.282636	-5.05685	-0.459532	0.849108
Peng et al., 2014; Fang, 2017	Maxionggou pluton	99.9613	29.1401	SJ199 06	213.9	0.081601	0.00325	0.282709	2.8e-05	0.282696	-2.68755	1.60783	0.990623
Peng et al., 2014; Fang, 2017	Maxionggou pluton	99.9613	29.1401	SJ199 07	231.1	0.047128	0.001847	0.282665	2.8e-05	0.282657	-4.24351	0.612039	0.99066
Peng et al., 2014; Fang, 2017	Maxionggou pluton	99.9613	29.1401	SJ199 08	217.6	0.068985	0.002705	0.282617	1.8e-05	0.282606	-5.94091	-1.49412	0.636834
Peng et al., 2014; Fang, 2017	Maxionggou pluton	99.9613	29.1401	SJ199 09	232.1	0.035124	0.001465	0.282641	1.8e-05	0.282635	-5.09221	-0.15734	0.636855
Peng et al., 2014; Fang, 2017	Maxionggou pluton	99.9613	29.1401	SJ199 10	215.2	0.033033	0.001369	0.282616	2e-05	0.28261	-5.97627	-1.38837	0.70759
Peng et al., 2014; Fang, 2017	Maxionggou pluton	99.9613	29.1401	SJ199 11	244.8	0.044334	0.001748	0.282684	2.4e-05	0.282676	-3.57162	1.589	0.849164
Peng et al., 2014; Fang, 2017	Maxionggou pluton	99.9613	29.1401	SJ199 12	244	0.025816	0.001098	0.28268	2.2e-05	0.282675	-3.71307	1.53557	0.778398
Peng et al., 2014; Fang, 2017	Maxionggou pluton	99.9613	29.1401	SJ199 13	216.1	0.056388	0.00228	0.282636	2.8e-05	0.282627	-5.26902	-0.791847	0.990627
Peng et al., 2014; Fang, 2017	Maxionggou pluton	99.9613	29.1401	SJ199 14	240	0.071594	0.002755	0.282605	1.8e-05	0.282593	-6.36526	-1.46761	0.636866
Peng et al., 2014; Fang, 2017	Maxionggou pluton	99.9613	29.1401	SJ199 15	245.5	0.07361	0.002938	0.282609	1.2e-05	0.282596	-6.22381	-1.24327	0.424582
Peng et al., 2014; Fang, 2017	Maxionggou pluton	99.9613	29.1401	SJ199 16	215.5	0.064253	0.002557	0.282655	3e-05	0.282645	-4.59713	-0.171607	1.06139
Peng et al., 2014; Fang, 2017	Shengmu pluton	100.55	29.0545	SJ241 01	216.3	0.019851	0.000889	0.282435	3e-05	0.282431	-12.3769	-7.69985	1.06139
Peng et al., 2014; Fang, 2017	Shengmu pluton	100.55	29.0545	SJ241 02	215.5	0.024172	0.001072	0.282501	2.4e-05	0.282497	-10.043	-5.40824	0.849108
Peng et al., 2014; Fang, 2017	Shengmu pluton	100.55	29.0545	SJ241 03	215.2	0.015092	0.000696	0.282454	3e-05	0.282451	-11.705	-7.02399	1.06138
Peng et al., 2014; Fang, 2017	Shengmu pluton	100.55	29.0545	SJ241 04	217.3	0.018989	0.00081	0.282511	2.2e-05	0.282508	-9.68934	-4.97795	0.778352
Peng et al., 2014; Fang, 2017	Shengmu pluton	100.55	29.0545	SJ241 05	216.1	0.015045	0.000675	0.282412	1.6e-05	0.282409	-13.1902	-8.4873	0.566073
Peng et al., 2014; Fang, 2017	Shengmu pluton	100.55	29.0545	SJ241 06	211.2	0.014008	0.000656	0.282448	1.6e-05	0.282445	-11.9172	-7.31789	0.566067
Peng et al., 2014; Fang, 2017	Shengmu pluton	100.55	29.0545	SJ241 07	252.2	0.016602	0.000761	0.282503	1.2e-05	0.282499	-9.97224	-4.49394	0.424589
Peng et al., 2014; Fang, 2017	Shengmu pluton	100.55	29.0545	SJ241 08	216.7	0.014306	0.000672	0.282441	1.4e-05	0.282438	-12.1647	-7.44777	0.495314
Peng et al., 2014; Fang, 2017	Shengmu pluton	100.55	29.0545	SJ241 09	216.6	0.018959	0.000898	0.282519	1.6e-05	0.282515	-9.40644	-4.72275	0.566073
Peng et al., 2014; Fang, 2017	Shengmu pluton	100.55	29.0545	SJ241 10	217.2	0.01677	0.000821	0.282527	2e-05	0.282524	-9.12354	-4.41563	0.707593
Peng et al., 2014; Fang, 2017	Shengmu pluton	100.55	29.0545	SJ241 11	215.1	0.022377	0.001049	0.282497	3e-05	0.282493	-10.1844	-5.55511	1.06138
Peng et al., 2014; Fang, 2017	Shengmu pluton	100.55	29.0545	SJ241 12	215.8	0.017094	0.000748	0.282443	3.2e-05	0.28244	-12.094	-7.40751	1.13214
Peng et al., 2014; Fang, 2017	Shengmu pluton	100.55	29.0545	SJ241 13	215.8	0.015768	0.000747	0.282499	2.2e-05	0.282496	-10.1137	-5.42611	0.77835
Peng et al., 2014; Fang, 2017	Shengmu pluton	100.55	29.0545	SJ241 14	213.4	0.014884	0.000695	0.282471	2.4e-05	0.282468	-11.1038	-6.46165	0.849104
Peng et al., 2014; Fang, 2017	Shengmu pluton	100.55	29.0545	SJ241 15	251.6	0.01611	0.000757	0.282468	2.2e-05	0.282464	-11.2099	-5.74472	0.778412
Peng et al., 2014; Fang, 2017	Shengmu pluton	100.55	29.0545	SJ241 16	251.6	0.013694	0.000648	0.28249	2.4e-05	0.282487	-10.432	-4.94815	0.849176
Peng et al., 2014; Fang, 2017	Shengmu pluton	100.547	29.0435	SJ235 01	250.8	0.03341	0.001424	0.282528	2.8e-05	0.282521	-9.08818	-3.74998	0.990704
Peng et al., 2014; Fang, 2017	Shengmu pluton	100.547	29.0435	SJ235 02	265.9	0.099571	0.004102	0.282497	2e-05	0.282477	-10.1844	-4.99606	0.70767
Peng et al., 2014; Fang, 2017	Shengmu pluton	100.547	29.0435	SJ235 03	220.3	0.050008	0.002155	0.282532	1.6e-05	0.282523	-8.94673	-4.36589	0.566078
Peng et al., 2014; Fang, 2017	Shengmu pluton	100.547	29.0435	SJ235 04	256.7	0.051662	0.002271	0.282485	3.2e-05	0.282474	-10.6088	-5.28946	1.13225
Peng et al., 2014; Fang, 2017	Shengmu pluton	100.547	29.0435	SJ235 05	222.6	0.144233	0.005866	0.282483	3.4e-05	0.282459	-10.6795	-6.59836	1.20292
Peng et al., 2014; Fang, 2017	Shengmu pluton	100.547	29.0435	SJ235 06	219.1	0.042275	0.001832	0.282542	2.8e-05	0.282534	-8.5931	-3.99027	0.990634
Peng et al., 2014; Fang, 2017	Shengmu pluton	100.547	29.0435	SJ235 07	222.8	0.073947	0.003095	0.282483	3.4e-05	0.28247	-10.6795	-6.18602	1.20292
Peng et al., 2014; Fang, 2017	Shengmu pluton	100.547	29.0435	SJ235 08	223	0.038495	0.001704	0.282539	4.2e-05	0.282532	-8.69919	-3.99537	1.48596
Peng et al., 2014; Fang, 2017	Shengmu pluton	100.547	29.0435	SJ235 09	221.1	0.051257	0.002141	0.282581	2.4e-05	0.282572	-7.21396	-2.61355	0.849119
Peng et al., 2014; Fang, 2017	Shengmu pluton	100.547	29.0435	SJ235 10	221	0.060225	0.002542	0.282542	2.4e-05	0.282531	-8.5931	-4.05411	0.849118
Peng et al., 2014; Fang, 2017	Shengmu pluton	100.547	29.0435	SJ235 11	218.2	0.031086	0.001351	0.282605	2e-05	0.282599	-6.36526	-1.71083	0.707594
Peng et al., 2014; Fang, 2017	Shengmu pluton	100.547	29.0435	SJ235 12	257.9	0.019617	0.000936	0.282523	1.8e-05	0.282518	-9.26499	-3.69198	0.636891
Peng et al., 2014; Fang, 2017	Shengmu pluton	100.547	29.0435	SJ235 13	261.1	0.051795	0.002204	0.282543	3.4e-05	0.282532	-8.55774	-3.1342	1.20303
Peng et al., 2014; Fang, 2017	Shengmu pluton	100.547	29.0435	SJ235 14	213.7	0.07343	0.003102	0.282483	2.4e-05	0.282471	-10.6795	-6.371	0.849105
Peng et al., 2014; Fang, 2017	Shengmu pluton	100.547	29.0435	SJ235 15	211	0.081601	0.003426	0.282579	2.2e-05	0.282565	-7.28469	-3.07441	0.778341
Peng et al., 2014; Fang, 2017	Shengmu pluton	100.547	29.0435	SJ235 16	211	0.090151	0.003748	0.282496	4e-05	0.282481	-10.2198	-6.05585	1.41517
Peng et al., 2014; Fang, 2017	Shengmu pluton	100.55	29.0545	SJ246 01	214.5	0.022366	0.000984	0.28241	8.2e-05	0.282406	-13.261	-8.63684	2.90111
Peng et al., 2014; Fang, 2017	Shengmu pluton	100.55	29.0545	SJ246 05	212.2	0.0276	0.001185	0.282315	0.00012	0.28231	-16.6204	-12.0758	4.24551
Peng et al., 2014; Fang, 2017	Shengmu pluton	100.55	29.0545	SJ246 06	217.3	0.022155	0.001006	0.282373	0.000148	0.282369	-14.5694	-9.88853	5.23619
Peng et al., 2014; Fang, 2017	Shengmu pluton	100.55	29.0545	SJ246 07	213.2	0.021773	0.000967	0.282479	7.6e-05	0.282475	-10.8209	-6.22136	2.68883
Peng et al., 2014; Fang, 2017	Shengmu pluton	100.55	29.0545	SJ246 08	214.6	0.022387	0.000962	0.282487	9.4e-05	0.282483	-10.538	-5.90733	3.32567
Peng et al., 2014; Fang, 2017	Shengmu pluton	100.55	29.0545	SJ246 09	216.7	0.011238	0.000527	0.282333	9e-05	0.282331	-15.9839	-11.248	3.18416
Peng et al., 2014; Fang, 2017	Shengmu pluton	100.55	29.0545	SJ246 13	219.8	0.02239	0.000996	0.28243	6.4e-05	0.282426	-12.5537	-7.81644	2.26431
Peng et al., 2014; Fang, 2017	Shengmu pluton	100.55	29.0545	SJ246 14	217.6	0.020484	0.000911	0.282474	5.8e-05	0.28247	-10.9978	-6.29503	2.05202
Peng et al., 2014; Fang, 2017	Shengmu pluton	100.55	29.0545	SJ246 15	217	0.027403	0.001195	0.282348	6.2e-05	0.282343	-15.4534	-10.8066	2.19354
Peng et al., 2014; Fang, 2017	Shengmu pluton	100.55	29.0545	SJ246 16	216.3	0.018764	0.00084	0.282408	7.6e-05	0.282405	-13.3317	-8.64808	2.68885
Peng et al., 2014; Fang, 2017	Shengmu pluton	100.55	29.0545	SJ246 17	218	0.022563	0.001019	0.282357	0.000102	0.282353	-15.1352	-10.4414	3.60873
Peng et al., 2014; Fang, 2017	Shengmu pluton	100.55	29.0545	SJ246 19	216.3	0.02497	0.001101	0.282382	5e-05	0.282378	-14.2511	-9.60531	1.76898
Peng et al., 2014; Fang, 2017	Shengmu pluton	100.55	29.0545	SJ246 20	249.1	0.029147	0.001256	0.282121	0.000242	0.282115	-23.4807	-18.1591	8.56248
Peng et al., 2014; Fang, 2017	Shengmu pluton	100.55	29.0545	SJ246 21	248.1	0.02692	0.001165	0.282421	0.0001	0.282416	-12.872	-7.55095	3.53821
Peng et al., 2014; Fang, 2017	Shengmu pluton	100.55	29.0545	SJ246 22	217.1	0.026032	0.001111	0.282458	6.2e-05	0.282453	-11.5636	-6.90067	2.19354
Peng et al., 2014; Fang, 2017	Shengmu pluton	100.55	29.0545	SJ246 24	219	0.018131	0.000803	0.282481	5.2e-05	0.282478	-10.7502	-6.00138	1.83975
Peng et al., 2014; Fang, 2017	Shengmu pluton	100.55	29.0545	SJ252 01	222.1	0.012599	0.000597	0.282547	2.6e-05	0.282545	-8.41629	-3.56862	0.919881
Peng et al., 2014; Fang, 2017	Shengmu pluton	100.55	29.0545	SJ252 02	255.2	0.046723	0.002018	0.282567	3.2e-05	0.282557	-7.70904	-2.37651	1.13224
Peng et al., 2014; Fang, 2017	Shengmu pluton	100.55	29.0545	SJ252 03	219.6	0.031192	0.001399	0.282543	2.2e-05	0.282537	-8.55774	-3.88142	0.778356
Peng et al., 2014; Fang, 2017	Shengmu pluton	100.55	29.0545	SJ252 04	245.7	0.02994	0.001297	0.282508	2.2e-05	0.282502	-9.79543	-4.54582	0.778401
Peng et al., 2014; Fang, 2017	Shengmu pluton	100.55	29.0545	SJ252 05	214	0.008852	0.000449	0.282476	1.4e-05	0.282474	-10.927	-6.23683	0.495311
Peng et al., 2014; Fang, 2017	Shengmu pluton	100.55	29.0545	SJ252 06	215.6	0.022881	0.001012	0.282508	3e-05	0.282504	-9.79543	-5.14987	1.06139
Peng et al., 2014; Fang, 2017	Shengmu pluton	100.55	29.0545	SJ252 07	218.8	0.034063	0.001431	0.282508	3.4e-05	0.282502	-9.79543	-5.14142	1.20291
Peng et al., 2014; Fang, 2017	Shengmu pluton	100.55	29.0545	SJ252 08	219.7	0.029801	0.001332	0.282474	2.2e-05	0.282469	-10.9978	-6.31075	0.778356
Peng et al., 2014; Fang, 2017	Shengmu pluton	100.55	29.0545	SJ252 09	245.3	0.018886	0.000811	0.282546	2.6e-05	0.282542	-8.45165	-3.13095	0.919928
Peng et al., 2014; Fang, 2017	Shengmu pluton	100.55	29.0545	SJ252 10	220.8	0.029992	0.001373	0.282464	2e-05	0.282458	-11.3514	-6.64701	0.707598
Peng et al., 2014; Fang, 2017	Shengmu pluton	100.55	29.0545	SJ252 11	245.7	0.03279	0.001475	0.282463	3e-05	0.282456	-11.3867	-6.16696	1.06146
Peng et al., 2014; Fang, 2017	Shengmu pluton	100.55	29.0545	SJ252 12	221.2	0.015969	0.000747	0.282429	3.6e-05	0.282426	-12.5891	-7.78511	1.27368
Peng et al., 2014; Fang, 2017	Shengmu pluton	100.55	29.0545	SJ252 13	219.7	0.021644	0.000994	0.282408	4e-05	0.282404	-13.3317	-8.59667	1.41519
Peng et al., 2014; Fang, 2017	Shengmu pluton	100.55	29.0545	SJ252 14	218.5	0.037207	0.001675	0.282468	2e-05	0.282461	-11.2099	-6.5983	0.707595
Peng et al., 2014; Fang, 2017	Shengmu pluton	100.55	29.0545	SJ252 15	218.6	0.031579	0.001444	0.282465	3e-05	0.282459	-11.316	-6.6689	1.06139
Peng et al., 2014; Fang, 2017	Shengmu pluton	100.55	29.0545	SJ252 16	250.1	0.012723	0.000612	0.282404	2.6e-05	0.282401	-13.4731	-8.01785	0.919938
Yan et al., 2017	Xiuwacu pluton	99.97	28.4961	XWC13B20 1	227	0.0372	0.001504	0.282689	2.7e-05	0.282683	-3.39481	1.42634	0.955271
Yan et al., 2017	Xiuwacu pluton	99.97	28.4961	XWC13B20 2	223	0.02064	0.000815	0.282735	2.2e-05	0.282732	-1.76813	3.07035	0.778362
Yan et al., 2017	Xiuwacu pluton	99.97	28.4961	XWC13B20 3	221	0.0342	0.001341	0.2827	3.2e-05	0.282694	-3.00582	1.71161	1.13216
Yan et al., 2017	Xiuwacu pluton	99.97	28.4961	XWC13B20 4	222	0.04767	0.001761	0.282689	3.5e-05	0.282682	-3.39481	1.28211	1.2383
Yan et al., 2017	Xiuwacu pluton	99.97	28.4961	XWC13B20 5	223	0.0553	0.002033	0.282722	4.3e-05	0.282714	-2.22784	2.43062	1.52134
Yan et al., 2017	Xiuwacu pluton	99.97	28.4961	XWC13B20 6	214	0.02145	0.000946	0.282761	3.3e-05	0.282757	-0.848701	3.7759	1.16752
Yan et al., 2017	Xiuwacu pluton	99.97	28.4961	XWC13B20 7	218	0.0359	0.001353	0.282723	2.9e-05	0.282717	-2.19248	2.45941	1.02601
Yan et al., 2017	Xiuwacu pluton	99.97	28.4961	XWC13B20 8	220	0.02791	0.00109	0.282674	3e-05	0.28267	-3.92524	0.80688	1.0614
Yan et al., 2017	Xiuwacu pluton	99.97	28.4961	XWC13B20 9	216	0.03716	0.001395	0.282674	3e-05	0.282668	-3.92524	0.677022	1.06139
Yan et al., 2017	Xiuwacu pluton	99.97	28.4961	XWC13B20 10	215	0.0232	0.001013	0.282713	2.5e-05	0.282709	-2.5461	2.08982	0.884487
Leng et al., 2014	Disuga	99.9154	28.1622	DSG07-7 1	221.9	0.062438	0.002036	0.28267	2.5e-05	0.282662	-4.06669	0.567385	0.8845
Leng et al., 2014	Disuga	99.9154	28.1622	DSG07-7 2	219.5	0.049049	0.0017	0.282742	2.8e-05	0.282735	-1.52059	3.1133	0.990635
Leng et al., 2014	Disuga	99.9154	28.1622	DSG07-7 3	1778.3	0.027242	0.000817	0.281516	2.2e-05	0.281488	-44.8751	-5.76268	0.781109
Leng et al., 2014	Disuga	99.9154	28.1622	DSG07-7 4	222.9	0.029715	0.001017	0.282725	2.1e-05	0.282721	-2.12175	2.68457	0.742982
Leng et al., 2014	Disuga	99.9154	28.1622	DSG07-7 5	223	0.04341	0.001454	0.282683	2.2e-05	0.282677	-3.60698	1.13627	0.778362
Leng et al., 2014	Disuga	99.9154	28.1622	DSG07-7 6	216.7	0.022048	0.000781	0.282688	1.7e-05	0.282685	-3.43017	1.27535	0.601453
Leng et al., 2014	Disuga	99.9154	28.1622	DSG07-7 7	219.9	0.020481	0.000686	0.282703	2.1e-05	0.2827	-2.89973	1.88954	0.742977
Leng et al., 2014	Disuga	99.9154	28.1622	DSG07-7 8	223.9	0.035646	0.001202	0.282669	2e-05	0.282664	-4.10206	0.697485	0.707603
Leng et al., 2014	Disuga	99.9154	28.1622	DSG07-7 9	220	0.029189	0.001031	0.282672	2e-05	0.282668	-3.99597	0.744711	0.707597
Leng et al., 2014	Disuga	99.9154	28.1622	DSG07-7 10	216.8	0.042583	0.001482	0.282718	2.3e-05	0.282712	-2.36929	2.23833	0.813731
Leng et al., 2014	Disuga	99.9154	28.1622	DSG07-7 11	210.7	0.036432	0.001295	0.282757	1.8e-05	0.282752	-0.990152	3.51423	0.636824
Leng et al., 2014	Disuga	99.9154	28.1622	DSG07-7 12	221.6	0.038555	0.001416	0.282704	2.7e-05	0.282698	-2.86437	1.85497	0.95526
Leng et al., 2014	Disuga	99.9154	28.1622	DSG07-3 1	936.1	0.067664	0.002393	0.282408	2.9e-05	0.282366	-13.3317	6.13759	1.02767
Leng et al., 2014	Disuga	99.9154	28.1622	DSG07-3 2	1594	0.073218	0.002519	0.282025	2.7e-05	0.281949	-26.8755	6.34812	0.958228
Leng et al., 2014	Disuga	99.9154	28.1622	DSG07-3 3	257.1	0.023842	0.000823	0.282691	1.9e-05	0.282687	-3.32408	2.25423	0.672273
Leng et al., 2014	Disuga	99.9154	28.1622	DSG07-3 4	1942.7	0.054606	0.001753	0.281697	2.7e-05	0.281632	-38.4745	3.1363	0.958998
Leng et al., 2014	Disuga	99.9154	28.1622	DSG07-3 5	835.6	0.041811	0.001341	0.282314	1.8e-05	0.282293	-16.6558	1.28279	0.637717
Leng et al., 2014	Disuga	99.9154	28.1622	DSG07-3 6	214.9	0.04129	0.00155	0.282605	2e-05	0.282599	-6.36526	-1.8097	0.707589
Leng et al., 2014	Disuga	99.9154	28.1622	DSG07-3 7	1210.1	0.04219	0.001354	0.281811	1.9e-05	0.28178	-34.4431	-8.41041	0.673718
Leng et al., 2014	Disuga	99.9154	28.1622	DSG07-3 8	209.1	0.025886	0.000894	0.282724	1.8e-05	0.282721	-2.15712	2.36793	0.636822
Leng et al., 2014	Disuga	99.9154	28.1622	DSG07-3 9	1573.1	0.038247	0.001458	0.281979	2.6e-05	0.281936	-28.5022	5.39431	0.922694
Leng et al., 2014	Disuga	99.9154	28.1622	DSG07-3 10	869.3	0.024947	0.000853	0.282319	2.7e-05	0.282305	-16.479	2.47363	0.956649
Leng et al., 2014	Disuga	99.9154	28.1622	DSG07-3 12	225.1	0.026311	0.00095	0.282745	2.1e-05	0.282741	-1.4145	3.44972	0.742985
Leng et al., 2014	Disuga	99.9154	28.1622	DSG07-3 14	223.5	0.045043	0.001609	0.282674	2.3e-05	0.282667	-3.92524	0.805577	0.813743
Leng et al., 2014	Disuga	99.9154	28.1622	DSG07-3 15	220.3	0.035274	0.00127	0.282679	2.1e-05	0.282674	-3.74843	0.964001	0.742977
Leng et al., 2014	Disuga	99.9154	28.1622	DSG07-3 17	1588.1	0.026156	0.001022	0.282009	2.1e-05	0.281978	-27.4413	7.25385	0.745279
Leng et al., 2012	Xuejiping	99.8375	28.0333	X07-23 1	220	0.019308	0.000813	0.282666	1.4e-05	0.282663	-4.20814	0.564177	0.495318
Leng et al., 2012	Xuejiping	99.8375	28.0333	X07-23 2	215	0.015906	0.00068	0.282686	1.4e-05	0.282683	-3.50089	1.18196	0.495312
Leng et al., 2012	Xuejiping	99.8375	28.0333	X07-23 3	223	0.02404	0.000957	0.282659	1.4e-05	0.282655	-4.45568	0.360506	0.495321
Leng et al., 2012	Xuejiping	99.8375	28.0333	X07-23 4	218	0.024451	0.001013	0.282704	1.6e-05	0.2827	-2.86437	1.83625	0.566075
Leng et al., 2012	Xuejiping	99.8375	28.0333	X07-23 5	217	0.012814	0.00054	0.282674	1.4e-05	0.282672	-3.92524	0.821184	0.495315
Leng et al., 2012	Xuejiping	99.8375	28.0333	X07-23 6	219	0.021818	0.000938	0.282675	1.4e-05	0.282671	-3.88988	0.842728	0.495317
Leng et al., 2012	Xuejiping	99.8375	28.0333	X07-23 7	217	0.017602	0.000734	0.282678	1.4e-05	0.282675	-3.78379	0.934838	0.495315
Leng et al., 2012	Xuejiping	99.8375	28.0333	X07-23 8	218	0.024704	0.000967	0.282669	1.2e-05	0.282665	-4.10206	0.604601	0.424556
Leng et al., 2012	Xuejiping	99.8375	28.0333	X07-23 9	218	0.017182	0.000712	0.282672	1.3e-05	0.282669	-3.99597	0.747534	0.459936
Leng et al., 2012	Xuejiping	99.8375	28.0333	X07-23 10	218	0.021089	0.000846	0.28265	1.3e-05	0.282647	-4.77394	-0.0501541	0.459936
Leng et al., 2012	Xuejiping	99.8375	28.0333	X07-23 11	219	0.01513	0.000659	0.28269	1.4e-05	0.282687	-3.35944	1.41387	0.495317
Leng et al., 2012	Xuejiping	99.8375	28.0333	X07-23 12	219	0.017547	0.000718	0.282662	1.4e-05	0.282659	-4.34959	0.414681	0.495317
Leng et al., 2012	Xuejiping	99.8375	28.0333	X07-23 13	219	0.036531	0.001472	0.28266	1.7e-05	0.282654	-4.42032	0.234626	0.601456
Leng et al., 2012	Xuejiping	99.8375	28.0333	X07-23 14	217	0.028675	0.00115	0.282682	1.7e-05	0.282677	-3.64234	1.01661	0.601454
Leng et al., 2012	Xuejiping	99.8375	28.0333	X07-23 15	218	0.016774	0.000696	0.282671	1.6e-05	0.282668	-4.03133	0.714463	0.566075
Leng et al., 2012	Xuejiping	99.8375	28.0333	X07-20 1	221	0.050695	0.001838	0.282677	2e-05	0.282669	-3.81916	0.825165	0.707599
Leng et al., 2012	Xuejiping	99.8375	28.0333	X07-20 2	213	0.034696	0.001304	0.282714	2.1e-05	0.282709	-2.51074	2.04094	0.742965
Leng et al., 2012	Xuejiping	99.8375	28.0333	X07-20 3	223	0.030074	0.001105	0.282686	2e-05	0.282681	-3.50089	1.29392	0.707602
Leng et al., 2012	Xuejiping	99.8375	28.0333	X07-20 4	219	0.039473	0.001496	0.282658	1.9e-05	0.282652	-4.49104	0.160387	0.672216
Leng et al., 2012	Xuejiping	99.8375	28.0333	X07-20 5	220	0.027837	0.001084	0.282692	1.8e-05	0.282688	-3.28872	1.44459	0.636837
Leng et al., 2012	Xuejiping	99.8375	28.0333	X07-20 6	222	0.032903	0.001281	0.282679	2e-05	0.282674	-3.74843	0.998843	0.7076
Leng et al., 2012	Xuejiping	99.8375	28.0333	X07-20 7	223	0.044788	0.001658	0.282645	2.2e-05	0.282638	-4.95076	-0.23829	0.778362
Leng et al., 2012	Xuejiping	99.8375	28.0333	X07-20 8	218	0.031779	0.00124	0.2827	1.9e-05	0.282695	-3.00582	1.66198	0.672214
Leng et al., 2012	Xuejiping	99.8375	28.0333	X07-20 9	219	0.033119	0.001242	0.282663	1.9e-05	0.282658	-4.31423	0.374105	0.672216
Leng et al., 2012	Xuejiping	99.8375	28.0333	X07-20 10	216	0.035173	0.001316	0.282666	1.9e-05	0.282661	-4.20814	0.40528	0.672211
Leng et al., 2012	Xuejiping	99.8375	28.0333	X07-20 11	213	0.031273	0.00116	0.282735	2.1e-05	0.28273	-1.76813	2.80421	0.742965
Leng et al., 2012	Xuejiping	99.8375	28.0333	X07-20 12	220	0.028405	0.001156	0.282704	2.2e-05	0.282699	-2.86437	1.85866	0.778357
Leng et al., 2012	Xuejiping	99.8375	28.0333	X07-20 13	218	0.032269	0.001248	0.282684	2.8e-05	0.282679	-3.57162	1.09475	0.990632
Leng et al., 2012	Xuejiping	99.8375	28.0333	X07-20 14	220	0.02941	0.001196	0.282699	2.1e-05	0.282694	-3.04118	1.67594	0.742977
Leng et al., 2012	Xuejiping	99.8375	28.0333	X07-20 15	218	0.029776	0.001203	0.282705	2.2e-05	0.2827	-2.829	1.84422	0.778353
Leng et al., 2012	Xuejiping	99.8375	28.0333	X07-20 16	216	0.026442	0.001062	0.282638	2e-05	0.282634	-5.1983	-0.549035	0.707591
Leng et al., 2018	Pulang pluton	99.9643	28.048	PL12-1 2	215	0.035458	0.001223	0.282597	2.8e-05	0.282592	-6.64816	-2.04408	0.990625
Leng et al., 2018	Pulang pluton	99.9643	28.048	PL12-1 3	215	0.030129	0.000926	0.282627	2.4e-05	0.282623	-5.58728	-0.940434	0.849107
Leng et al., 2018	Pulang pluton	99.9643	28.048	PL12-1 4	213	0.026795	0.000862	0.282622	2.4e-05	0.282619	-5.7641	-1.15164	0.849103
Leng et al., 2018	Pulang pluton	99.9643	28.048	PL12-1 5	218	0.026361	0.000918	0.282583	2.4e-05	0.282579	-7.14324	-2.43098	0.849113
Leng et al., 2018	Pulang pluton	99.9643	28.048	PL12-1 6	219	0.024763	0.000786	0.282622	2.6e-05	0.282619	-5.7641	-1.01037	0.919874
Leng et al., 2018	Pulang pluton	99.9643	28.048	PL12-1 7	213	0.037286	0.00114	0.282639	3e-05	0.282634	-5.16293	-0.589383	1.06138
Leng et al., 2018	Pulang pluton	99.9643	28.048	PL12-1 8	217	0.015753	0.000524	0.282622	2.4e-05	0.28262	-5.7641	-1.01626	0.849111
Leng et al., 2018	Pulang pluton	99.9643	28.048	PL12-1 9	218	0.02567	0.000813	0.28262	2.6e-05	0.282617	-5.83482	-1.10678	0.919872
Leng et al., 2018	Pulang pluton	99.9643	28.048	PL12-1 10	216	0.028518	0.000883	0.282659	2.8e-05	0.282655	-4.45568	0.219526	0.990627
Leng et al., 2018	Pulang pluton	99.9643	28.048	PL12-1 11	210	0.036311	0.001134	0.282613	2.6e-05	0.282609	-6.08236	-1.57298	0.919856
Leng et al., 2018	Pulang pluton	99.9643	28.048	PL12-1 12	218	0.025894	0.000872	0.282622	3e-05	0.282618	-5.7641	-1.04454	1.06139
Leng et al., 2018	Pulang pluton	99.9643	28.048	PL12-1 13	213	0.037847	0.001154	0.282595	3.2e-05	0.28259	-6.71889	-2.14805	1.13214
Leng et al., 2018	Pulang pluton	99.9643	28.048	PL12-1 14	219	0.026674	0.000865	0.282619	2.8e-05	0.282615	-5.87018	-1.12796	0.990634
Leng et al., 2018	Pulang pluton	99.9643	28.048	PL12-1 15	211	0.029221	0.000926	0.282612	2.6e-05	0.282608	-6.11772	-1.55779	0.919858
Leng et al., 2018	Pulang pluton	99.9643	28.048	PL12-1 16	212.3	0.031103	0.000942	0.282627	2.6e-05	0.282623	-5.58728	-1.00118	0.91986
Leng et al., 2018	Pulang pluton	99.9643	28.048	PL12-1 17	212.3	0.024518	0.00084	0.282613	2.4e-05	0.28261	-6.08236	-1.48216	0.849102
Leng et al., 2018	Pulang pluton	99.9643	28.048	PL12-1 18	212.3	0.040465	0.001229	0.282672	3.6e-05	0.282667	-3.99597	0.550559	1.27365
Leng et al., 2018	Pulang pluton	99.9643	28.048	PL12-1 19	212.3	0.030416	0.001043	0.282599	2.8e-05	0.282595	-6.57744	-2.00599	0.990619
Leng et al., 2018	Pulang pluton	99.9643	28.048	PL12-1 20	212.3	0.034286	0.001047	0.282636	3.2e-05	0.282632	-5.26902	-0.697521	1.13214
Leng et al., 2018	Pulang pluton	99.9987	28.0488	PL12-6 1	215	0.032261	0.001068	0.282677	2.6e-05	0.282673	-3.81916	0.808333	0.919866
Leng et al., 2018	Pulang pluton	99.9987	28.0488	PL12-6 2	217	0.036703	0.001165	0.282633	1.8e-05	0.282628	-5.37511	-0.719148	0.636833
Leng et al., 2018	Pulang pluton	99.9987	28.0488	PL12-6 3	215	0.039918	0.001244	0.282622	1.8e-05	0.282617	-5.7641	-1.16258	0.63683
Leng et al., 2018	Pulang pluton	99.9987	28.0488	PL12-6 4	217	0.025337	0.000809	0.282633	1.6e-05	0.28263	-5.37511	-0.668017	0.566074
Leng et al., 2018	Pulang pluton	99.9987	28.0488	PL12-6 5	214	0.031121	0.000977	0.282628	2e-05	0.282624	-5.55192	-0.933945	0.707588
Leng et al., 2018	Pulang pluton	99.9987	28.0488	PL12-6 6	217	0.062273	0.001898	0.282625	2.4e-05	0.282617	-5.65801	-1.10746	0.849111
Leng et al., 2018	Pulang pluton	99.9987	28.0488	PL12-6 7	218	0.025386	0.000791	0.282627	2e-05	0.282624	-5.58728	-0.855951	0.707594
Leng et al., 2018	Pulang pluton	99.9987	28.0488	PL12-6 8	213	0.033339	0.00106	0.282622	2e-05	0.282618	-5.7641	-1.17955	0.707586
Leng et al., 2018	Pulang pluton	99.9987	28.0488	PL12-6 9	219	0.024294	0.000757	0.282621	2.2e-05	0.282618	-5.79946	-1.04154	0.778355
Leng et al., 2018	Pulang pluton	99.9987	28.0488	PL12-6 10	213	0.027098	0.000861	0.282617	2.2e-05	0.282614	-5.94091	-1.3284	0.778345
Leng et al., 2018	Pulang pluton	99.9987	28.0488	PL12-6 11	219	0.028461	0.000876	0.282627	2e-05	0.282623	-5.58728	-0.846514	0.707596
Leng et al., 2018	Pulang pluton	99.9987	28.0488	PL12-6 12	223	0.032112	0.000993	0.282629	2.2e-05	0.282625	-5.51656	-0.706211	0.778362
Leng et al., 2018	Pulang pluton	99.9987	28.0488	PL12-6 13	218	0.030103	0.000918	0.282633	2.2e-05	0.282629	-5.37511	-0.661998	0.778353
Leng et al., 2018	Pulang pluton	99.9987	28.0488	PL12-6 14	214	0.0366	0.001126	0.282641	2.2e-05	0.282636	-5.09221	-0.495117	0.778346
Leng et al., 2018	Pulang pluton	99.9987	28.0488	PL12-6 15	221	0.023795	0.000754	0.282614	2e-05	0.282611	-6.047	-1.2452	0.707599
Leng et al., 2018	Pulang pluton	99.9987	28.0488	PL12-6 16	216.8	0.032777	0.00104	0.282627	2e-05	0.282623	-5.58728	-0.917791	0.707592
Leng et al., 2018	Pulang pluton	99.9987	28.0488	PL12-6 17	216.8	0.028893	0.000908	0.28262	2e-05	0.282616	-5.83482	-1.14651	0.707592
Leng et al., 2018	Pulang pluton	99.9987	28.0488	PL12-6 18	216.8	0.036705	0.001106	0.282642	2e-05	0.282638	-5.05685	-0.396567	0.707592
Leng et al., 2018	Pulang pluton	99.9987	28.0488	PL12-6 19	216.8	0.037856	0.001154	0.282662	1.8e-05	0.282657	-4.34959	0.304137	0.636833
Leng et al., 2018	Pulang pluton	99.9987	28.0488	PL12-6 20	216.8	0.036723	0.001125	0.282624	2e-05	0.282619	-5.69337	-1.03613	0.707592
Leng et al., 2018	Pulang pluton	99.9949	28.0444	PL12-15 1	217	0.028031	0.000893	0.282613	3e-05	0.282609	-6.08236	-1.38767	1.06139
Leng et al., 2018	Pulang pluton	99.9949	28.0444	PL12-15 2	214	0.039812	0.001184	0.28263	2.6e-05	0.282625	-5.4812	-0.892505	0.919864
Leng et al., 2018	Pulang pluton	99.9949	28.0444	PL12-15 3	213	0.032858	0.00097	0.282635	2.8e-05	0.282631	-5.30438	-0.706935	0.990621
Leng et al., 2018	Pulang pluton	99.9949	28.0444	PL12-15 4	208	0.021481	0.000626	0.282617	2.4e-05	0.282615	-5.94091	-1.40458	0.849094
Leng et al., 2018	Pulang pluton	99.9949	28.0444	PL12-15 5	218	0.03238	0.000963	0.282618	2.4e-05	0.282614	-5.90555	-1.19919	0.849113
Leng et al., 2018	Pulang pluton	99.9949	28.0444	PL12-15 6	218	0.031728	0.000951	0.282638	2.4e-05	0.282634	-5.1983	-0.489861	0.849113
Leng et al., 2018	Pulang pluton	99.9949	28.0444	PL12-15 7	214	0.012438	0.00041	0.282607	2.4e-05	0.282605	-6.29453	-1.5966	0.849105
Leng et al., 2018	Pulang pluton	99.9949	28.0444	PL12-15 8	220	0.06675	0.001901	0.282657	3.4e-05	0.282649	-4.52641	0.0873257	1.20292
Leng et al., 2018	Pulang pluton	99.9949	28.0444	PL12-15 9	219	0.038499	0.001112	0.282604	3e-05	0.282599	-6.40062	-1.69446	1.06139
Leng et al., 2018	Pulang pluton	99.9949	28.0444	PL12-15 10	215	0.031644	0.000941	0.282639	3.2e-05	0.282635	-5.16293	-0.518015	1.13214
Leng et al., 2018	Pulang pluton	99.9949	28.0444	PL12-15 11	216	0.025909	0.000797	0.282611	2.8e-05	0.282608	-6.15308	-1.4664	0.990627
Leng et al., 2018	Pulang pluton	99.9949	28.0444	PL12-15 12	219	0.028068	0.000838	0.282632	2.4e-05	0.282629	-5.41047	-0.664107	0.849115
Leng et al., 2018	Pulang pluton	99.9949	28.0444	PL12-15 13	214	0.025448	0.00076	0.282627	2.4e-05	0.282624	-5.58728	-0.938589	0.849105
Leng et al., 2018	Pulang pluton	99.9949	28.0444	PL12-15 14	218	0.04121	0.001179	0.282659	2.8e-05	0.282654	-4.45568	0.220214	0.990632
Leng et al., 2018	Pulang pluton	99.9949	28.0444	PL12-15 15	219	0.025575	0.000747	0.28261	2e-05	0.282607	-6.18845	-1.42927	0.707596
Leng et al., 2018	Pulang pluton	99.9949	28.0444	PL12-15 16	216.1	0.012699	0.000431	0.282628	2.4e-05	0.282626	-5.55192	-0.81042	0.849109
Leng et al., 2018	Pulang pluton	99.9949	28.0444	PL12-15 17	216.1	0.024091	0.000711	0.282616	2.2e-05	0.282613	-5.97627	-1.27502	0.77835
Leng et al., 2018	Pulang pluton	99.9949	28.0444	PL12-15 18	216.1	0.024762	0.000753	0.282629	2.2e-05	0.282626	-5.51656	-0.821096	0.77835
Leng et al., 2018	Pulang pluton	99.9949	28.0444	PL12-15 19	216.1	0.025162	0.000731	0.282605	2.6e-05	0.282602	-6.36526	-1.66706	0.919868
Leng et al., 2018	Pulang pluton	99.9949	28.0444	PL12-15 20	216.1	0.034537	0.001023	0.282619	2.6e-05	0.282615	-5.87018	-1.21351	0.919868
Leng et al., 2018	Pulang pluton	99.985	28.0593	PL12-27 1	216	0.027728	0.000841	0.282637	2.8e-05	0.282634	-5.23366	-0.552819	0.990627
Leng et al., 2018	Pulang pluton	99.985	28.0593	PL12-27 2	226	0.040932	0.001232	0.282666	2.4e-05	0.282661	-4.20814	0.631989	0.849128
Leng et al., 2018	Pulang pluton	99.985	28.0593	PL12-27 3	217	0.040759	0.001215	0.282649	2.8e-05	0.282644	-4.80931	-0.160255	0.990629
Leng et al., 2018	Pulang pluton	99.985	28.0593	PL12-27 4	214	0.028817	0.000855	0.28264	2.8e-05	0.282637	-5.12757	-0.492112	0.990623
Leng et al., 2018	Pulang pluton	99.985	28.0593	PL12-27 5	213	0.017208	0.000515	0.28262	2.6e-05	0.282618	-5.83482	-1.17348	0.919862
Leng et al., 2018	Pulang pluton	99.985	28.0593	PL12-27 6	220	0.045095	0.001329	0.282633	2.6e-05	0.282628	-5.37511	-0.678497	0.919876
Leng et al., 2018	Pulang pluton	99.985	28.0593	PL12-27 7	212	0.03499	0.001052	0.282641	2.8e-05	0.282637	-5.09221	-0.527802	0.990618
Leng et al., 2018	Pulang pluton	99.985	28.0593	PL12-27 8	215	0.030992	0.000918	0.282641	2.8e-05	0.282637	-5.09221	-0.443983	0.990625
Leng et al., 2018	Pulang pluton	99.985	28.0593	PL12-27 9	214	0.031188	0.000939	0.282639	2.6e-05	0.282635	-5.16293	-0.539389	0.919864
Leng et al., 2018	Pulang pluton	99.985	28.0593	PL12-27 10	215	0.031946	0.000943	0.282617	2.6e-05	0.282613	-5.94091	-1.29665	0.919866
Leng et al., 2018	Pulang pluton	99.985	28.0593	PL12-27 11	219	0.030566	0.000912	0.282654	2.8e-05	0.28265	-4.63249	0.103522	0.990634
Leng et al., 2018	Pulang pluton	99.985	28.0593	PL12-27 12	217	0.033739	0.000988	0.282639	2.6e-05	0.282635	-5.16293	-0.481448	0.91987
Leng et al., 2018	Pulang pluton	99.985	28.0593	PL12-27 13	213	0.038784	0.001146	0.282646	3e-05	0.282641	-4.9154	-0.342574	1.06138
Leng et al., 2018	Pulang pluton	99.985	28.0593	PL12-27 14	217	0.037616	0.001132	0.282646	2.4e-05	0.282641	-4.9154	-0.254473	0.849111
Leng et al., 2018	Pulang pluton	99.985	28.0593	PL12-27 15	221	0.045889	0.001319	0.282661	2.2e-05	0.282656	-4.38496	0.335006	0.778359
Leng et al., 2018	Pulang pluton	99.985	28.0593	PL12-27 16	215	0.035422	0.001054	0.282622	2.6e-05	0.282618	-5.7641	-1.13555	0.919866
Leng et al., 2018	Pulang pluton	99.985	28.0593	PL12-27 17	215.9	0.026541	0.000767	0.282654	2.8e-05	0.282651	-4.63249	0.0570349	0.990627
Leng et al., 2018	Pulang pluton	99.985	28.0593	PL12-27 18	215.9	0.043119	0.001264	0.282633	2.6e-05	0.282628	-5.37511	-0.756955	0.919868
Leng et al., 2018	Pulang pluton	99.985	28.0593	PL12-27 19	215.9	0.029069	0.000862	0.282655	2.6e-05	0.282652	-4.59713	0.0788392	0.919868
Leng et al., 2018	Pulang pluton	99.985	28.0593	PL12-27 20	215.9	0.033794	0.000994	0.282656	2.8e-05	0.282652	-4.56177	0.0953562	0.990627
Leng et al., 2018	Pulang pluton	99.985	28.0593	PL12-34 1	215	0.035242	0.000979	0.282653	2e-05	0.282649	-4.66786	-0.0281096	0.707589
Leng et al., 2018	Pulang pluton	99.985	28.0593	PL12-34 2	215	0.040298	0.001114	0.282659	2e-05	0.282655	-4.45568	0.164957	0.707589
Leng et al., 2018	Pulang pluton	99.985	28.0593	PL12-34 3	215	0.026699	0.000743	0.28263	2e-05	0.282627	-5.4812	-0.808254	0.707589
Leng et al., 2018	Pulang pluton	99.985	28.0593	PL12-34 4	215	0.036763	0.001047	0.282625	2e-05	0.282621	-5.65801	-1.02841	0.707589
Leng et al., 2018	Pulang pluton	99.985	28.0593	PL12-34 5	215	0.043071	0.001182	0.282635	2e-05	0.28263	-5.30438	-0.693827	0.707589
Leng et al., 2018	Pulang pluton	99.985	28.0593	PL12-34 6	215	0.034188	0.000956	0.282631	2e-05	0.282627	-5.44583	-0.803185	0.707589
Leng et al., 2018	Pulang pluton	99.985	28.0593	PL12-34 7	215	0.038411	0.001092	0.282632	2.4e-05	0.282628	-5.41047	-0.787158	0.849107
Leng et al., 2018	Pulang pluton	99.985	28.0593	PL12-34 8	215	0.035261	0.000999	0.282646	2e-05	0.282642	-4.9154	-0.278612	0.707589
Leng et al., 2018	Pulang pluton	99.985	28.0593	PL12-34 9	215	0.036306	0.001005	0.282658	2.2e-05	0.282654	-4.49104	0.145088	0.778348
Leng et al., 2018	Pulang pluton	99.985	28.0593	PL12-34 10	215	0.046297	0.001243	0.282618	2.2e-05	0.282613	-5.90555	-1.30396	0.778348
Leng et al., 2018	Pulang pluton	99.985	28.0593	PL12-34 11	215	0.038294	0.001063	0.282647	2.2e-05	0.282643	-4.88003	-0.25234	0.778348
Leng et al., 2018	Pulang pluton	99.985	28.0593	PL12-34 12	215	0.050125	0.001391	0.282685	2.4e-05	0.282679	-3.53626	1.04541	0.849107
Leng et al., 2018	Pulang pluton	99.985	28.0593	PL12-34 13	215	0.039182	0.001121	0.282643	2e-05	0.282638	-5.02148	-0.402111	0.707589
Leng et al., 2018	Pulang pluton	99.985	28.0593	PL12-34 14	215	0.027827	0.000777	0.282647	2e-05	0.282644	-4.88003	-0.211642	0.707589
Leng et al., 2018	Pulang pluton	99.985	28.0593	PL12-34 15	215	0.029648	0.000855	0.282649	2.2e-05	0.282646	-4.80931	-0.151982	0.778348
Leng et al., 2018	Pulang pluton	99.985	28.0593	PL12-34 16	215	0.030621	0.000884	0.282644	2e-05	0.28264	-4.98612	-0.333006	0.707589
Leng et al., 2018	Pulang pluton	99.985	28.0593	PL12-34 17	215	0.0419	0.001188	0.282645	2e-05	0.28264	-4.95076	-0.340886	0.707589
Leng et al., 2018	Pulang pluton	99.985	28.0593	PL12-34 18	215	0.037122	0.001065	0.282638	2.2e-05	0.282634	-5.1983	-0.571039	0.778348
Leng et al., 2018	Pulang pluton	99.985	28.0593	PL12-34 19	215	0.026236	0.000761	0.282654	2.2e-05	0.282651	-4.63249	0.0382913	0.778348
Leng et al., 2018	Pulang pluton	99.985	28.0593	PL12-34 20	215	0.044635	0.001278	0.282677	2e-05	0.282672	-3.81916	0.77845	0.707589
Leng et al., 2018	Pulang pluton	99.9876	28.0377	PL302-1 1	212	0.039385	0.001104	0.282653	2.4e-05	0.282649	-4.66786	-0.110548	0.849101
Leng et al., 2018	Pulang pluton	99.9876	28.0377	PL302-1 2	211	0.025768	0.000745	0.282634	2e-05	0.282631	-5.33975	-0.754168	0.707583
Leng et al., 2018	Pulang pluton	99.9876	28.0377	PL302-1 3	216	0.038901	0.001103	0.282639	2.2e-05	0.282635	-5.16293	-0.519517	0.77835
Leng et al., 2018	Pulang pluton	99.9876	28.0377	PL302-1 4	211	0.038213	0.001098	0.282631	2e-05	0.282627	-5.44583	-0.9096	0.707583
Leng et al., 2018	Pulang pluton	99.9876	28.0377	PL302-1 5	216	0.042788	0.001197	0.282652	2e-05	0.282647	-4.70322	-0.0730211	0.707591
Leng et al., 2018	Pulang pluton	99.9876	28.0377	PL302-1 6	217	0.035316	0.001023	0.282629	2.2e-05	0.282625	-5.51656	-0.840271	0.778352
Leng et al., 2018	Pulang pluton	99.9876	28.0377	PL302-1 7	214	0.027103	0.00078	0.282641	2e-05	0.282638	-5.09221	-0.44611	0.707588
Leng et al., 2018	Pulang pluton	99.9876	28.0377	PL302-1 8	214	0.03399	0.000974	0.282624	2.2e-05	0.28262	-5.69337	-1.07504	0.778346
Leng et al., 2018	Pulang pluton	99.9876	28.0377	PL302-1 9	217	0.030752	0.000882	0.282631	1.8e-05	0.282627	-5.44583	-0.749261	0.636833
Leng et al., 2018	Pulang pluton	99.9876	28.0377	PL302-1 10	209	0.02378	0.000674	0.28266	2e-05	0.282657	-4.42032	0.131936	0.70758
Leng et al., 2018	Pulang pluton	99.9876	28.0377	PL302-1 11	218	0.038898	0.001084	0.282624	1.8e-05	0.28262	-5.69337	-1.00437	0.636835
Leng et al., 2018	Pulang pluton	99.9876	28.0377	PL302-1 12	219	0.041332	0.001143	0.282648	2.2e-05	0.282643	-4.84467	-0.142241	0.778355
Leng et al., 2018	Pulang pluton	99.9876	28.0377	PL302-1 13	219	0.041562	0.001201	0.282668	2e-05	0.282663	-4.13742	0.556947	0.707596
Leng et al., 2018	Pulang pluton	99.9876	28.0377	PL302-1 14	221	0.032847	0.000969	0.282611	1.8e-05	0.282607	-6.15308	-1.38279	0.636839
Leng et al., 2018	Pulang pluton	99.9876	28.0377	PL302-1 15	221	0.023964	0.00068	0.282609	1.8e-05	0.282606	-6.22381	-1.41128	0.636839
Leng et al., 2018	Pulang pluton	99.9876	28.0377	PL302-1 16	214.2	0.035682	0.00105	0.282641	1.8e-05	0.282637	-5.09221	-0.480035	0.636829
Leng et al., 2018	Pulang pluton	99.9876	28.0377	PL302-1 17	214.2	0.034098	0.000985	0.282639	2e-05	0.282635	-5.16293	-0.541579	0.707588
Leng et al., 2018	Pulang pluton	99.9876	28.0377	PL302-1 18	214.2	0.035055	0.000997	0.282628	2e-05	0.282624	-5.55192	-0.932453	0.707588
Leng et al., 2018	Pulang pluton	99.9876	28.0377	PL302-1 19	214.2	0.031658	0.00093	0.282607	2e-05	0.282603	-6.29453	-1.66592	0.707588
Leng et al., 2018	Pulang pluton	99.9876	28.0377	PL302-1 20	214.2	0.024467	0.000706	0.282615	1.8e-05	0.282612	-6.01163	-1.35113	0.636829
Leng et al., 2018	Pulang pluton	No data	No data	PLD0104 1	215	0.033619	0.001	0.282634	2e-05	0.28263	-5.33975	-0.703308	0.707589
Leng et al., 2018	Pulang pluton	No data	No data	PLD0104 2	215	0.023868	0.00073	0.282614	2.2e-05	0.282611	-6.047	-1.37248	0.778348
Leng et al., 2018	Pulang pluton	No data	No data	PLD0104 3	215	0.028349	0.000844	0.282656	2e-05	0.282653	-4.56177	0.0972393	0.707589
Leng et al., 2018	Pulang pluton	No data	No data	PLD0104 4	215	0.034105	0.001013	0.282631	2e-05	0.282627	-5.44583	-0.811296	0.707589
Leng et al., 2018	Pulang pluton	No data	No data	PLD0104 5	215	0.035526	0.001064	0.282648	1.8e-05	0.282644	-4.84467	-0.217102	0.63683
Leng et al., 2018	Pulang pluton	No data	No data	PLD0104 6	215	0.03797	0.001123	0.282611	2.2e-05	0.282606	-6.15308	-1.53454	0.778348
Leng et al., 2018	Pulang pluton	No data	No data	PLD0104 7	215	0.022012	0.00067	0.282648	2e-05	0.282645	-4.84467	-0.161036	0.707589
Leng et al., 2018	Pulang pluton	No data	No data	PLD0104 8	215	0.017748	0.000528	0.282638	2e-05	0.282636	-5.1983	-0.494624	0.707589
Leng et al., 2018	Pulang pluton	No data	No data	PLD0104 9	215	0.043697	0.001332	0.282641	2.2e-05	0.282636	-5.09221	-0.502895	0.778348
Leng et al., 2018	Pulang pluton	No data	No data	PLD0104 10	215	0.024794	0.000749	0.282613	2.6e-05	0.28261	-6.08236	-1.41056	0.919866
Leng et al., 2018	Pulang pluton	No data	No data	PLD0104 11	215	0.037933	0.00114	0.282636	2.2e-05	0.282631	-5.26902	-0.652471	0.778348
Leng et al., 2018	Pulang pluton	No data	No data	PLD0104 12	215	0.039053	0.001145	0.282639	2.2e-05	0.282634	-5.16293	-0.547044	0.778348
Leng et al., 2018	Pulang pluton	No data	No data	PLD0104 13	215	0.030752	0.00092	0.282625	2e-05	0.282621	-5.65801	-1.01034	0.707589
Leng et al., 2018	Pulang pluton	No data	No data	PLD0104 14	215	0.024298	0.000767	0.282538	2.4e-05	0.282535	-8.73455	-4.06658	0.849107
Leng et al., 2018	Pulang pluton	No data	No data	PLD0104 15	215	0.037074	0.001102	0.282634	2e-05	0.28263	-5.33975	-0.717822	0.707589
Leng et al., 2018	Pulang pluton	No data	No data	PLD0104 16	215	0.023539	0.000719	0.282649	1.8e-05	0.282646	-4.80931	-0.132629	0.63683
Leng et al., 2018	Pulang pluton	No data	No data	PLD0104 17	215	0.032284	0.000971	0.282649	2e-05	0.282645	-4.80931	-0.168489	0.707589
Leng et al., 2018	Pulang pluton	No data	No data	PLD0104 18	215	0.029754	0.000888	0.28263	2e-05	0.282626	-5.4812	-0.828888	0.707589
Leng et al., 2018	Pulang pluton	No data	No data	PLD0104 19	215	0.025782	0.000764	0.282614	2e-05	0.282611	-6.047	-1.37731	0.707589
Leng et al., 2018	Pulang pluton	No data	No data	PLD0104 20	215	0.021628	0.000656	0.282617	2e-05	0.282614	-5.94091	-1.25581	0.707589
Leng et al., 2018	Pulang pluton	No data	No data	HN11-4 1	219	0.045365	0.001251	0.282766	2.6e-05	0.282761	-0.671889	4.01692	0.919874
Leng et al., 2018	Pulang pluton	No data	No data	HN11-4 2	219	0.060819	0.00164	0.282755	2.2e-05	0.282748	-1.06088	3.57135	0.778355
Leng et al., 2018	Pulang pluton	No data	No data	HN11-4 3	219	0.054427	0.001451	0.282763	2.6e-05	0.282757	-0.777976	3.88179	0.919874
Leng et al., 2018	Pulang pluton	No data	No data	HN11-4 4	219	0.076282	0.002077	0.282754	2.4e-05	0.282745	-1.09624	3.47263	0.849115
Leng et al., 2018	Pulang pluton	No data	No data	HN11-4 5	219	0.046164	0.001259	0.282743	2.2e-05	0.282738	-1.48523	3.20202	0.778355
Leng et al., 2018	Pulang pluton	No data	No data	HN11-4 6	219	0.05829	0.001531	0.282773	2.6e-05	0.282767	-0.424351	4.22399	0.919874
Leng et al., 2018	Pulang pluton	No data	No data	HN11-4 7	219	0.048532	0.001345	0.282741	2.4e-05	0.282735	-1.55595	3.1188	0.849115
Leng et al., 2018	Pulang pluton	No data	No data	HN11-4 8	219	0.039467	0.00109	0.282753	2.4e-05	0.282749	-1.1316	3.58032	0.849115
Leng et al., 2018	Pulang pluton	No data	No data	HN11-4 9	219	0.084724	0.002224	0.282819	5e-05	0.28281	1.20233	5.751	1.76899
Leng et al., 2018	Pulang pluton	No data	No data	HN11-4 10	219	0.043542	0.001206	0.282727	2.6e-05	0.282722	-2.05103	2.64363	0.919874
Leng et al., 2018	Pulang pluton	No data	No data	HN11-4 11	219	0.033674	0.000957	0.282718	2.4e-05	0.282714	-2.36929	2.3613	0.849115
Leng et al., 2018	Pulang pluton	No data	No data	HN11-4 12	219	0.060734	0.001739	0.282777	2.8e-05	0.28277	-0.2829	4.33536	0.990634
Leng et al., 2018	Pulang pluton	No data	No data	HN11-4 13	219	0.061952	0.001744	0.282745	2.4e-05	0.282738	-1.4145	3.20248	0.849115
Leng et al., 2018	Pulang pluton	No data	No data	HN11-4 14	219	0.028873	0.000796	0.282694	2e-05	0.282691	-3.21799	1.53553	0.707596
Leng et al., 2018	Pulang pluton	No data	No data	HN11-4 15	219	0.052361	0.001395	0.282736	2.6e-05	0.28273	-1.73277	2.93465	0.919874
Leng et al., 2018	Pulang pluton	No data	No data	HN11-4 16	219	0.050369	0.001387	0.282751	2.4e-05	0.282745	-1.20233	3.46651	0.849115
Leng et al., 2018	Pulang pluton	No data	No data	HN11-4 17	219	0.050511	0.001409	0.28275	2e-05	0.282744	-1.23769	3.42794	0.707596
Leng et al., 2018	Pulang pluton	No data	No data	HN11-4 18	219	0.068461	0.001804	0.28276	3e-05	0.282753	-0.884064	3.72448	1.06139
Leng et al., 2018	Pulang pluton	No data	No data	HN11-4 19	219	0.046271	0.001342	0.28272	2.4e-05	0.282715	-2.29857	2.37626	0.849115
Leng et al., 2018	Pulang pluton	No data	No data	HN11-4 20	219	0.046276	0.001273	0.282727	2e-05	0.282722	-2.05103	2.63392	0.707596
Cao et al., 2016	Pulang pluton	99.9889	28.0639	6628-588 01	217	0.015604	0.000531	0.282658	2.2e-05	0.282656	-4.49104	0.256402	0.778352
Cao et al., 2016	Pulang pluton	99.9889	28.0639	6628-588 02	223	0.015775	0.000513	0.282664	2.6e-05	0.282662	-4.27887	0.602944	0.919882
Cao et al., 2016	Pulang pluton	99.9889	28.0639	6628-588 03	217	0.016303	0.000542	0.282657	2.6e-05	0.282655	-4.52641	0.219443	0.91987
Cao et al., 2016	Pulang pluton	99.9889	28.0639	6628-588 04	213	0.008946	0.000326	0.282706	2.4e-05	0.282705	-2.79364	1.89578	0.849103
Cao et al., 2016	Pulang pluton	99.9889	28.0639	6628-588 05	218	0.030894	0.001025	0.282684	3.6e-05	0.28268	-3.57162	1.12693	1.27367
Cao et al., 2016	Pulang pluton	99.9889	28.0639	6628-588 07	218	0.01969	0.000655	0.282651	2.4e-05	0.282648	-4.73858	0.0127852	0.849113
Cao et al., 2016	Pulang pluton	99.9889	28.0639	6628-588 08	219	0.009452	0.000322	0.282648	2.2e-05	0.282647	-4.84467	-0.0232338	0.778355
Cao et al., 2016	Pulang pluton	99.9889	28.0639	6628-588 09	207	0.012363	0.000417	0.282641	2.8e-05	0.282639	-5.09221	-0.548721	0.990607
Cao et al., 2016	Pulang pluton	99.9889	28.0639	6628-588 10	216	0.022011	0.000725	0.282651	2.6e-05	0.282648	-4.73858	-0.0409217	0.919868
Cao et al., 2016	Pulang pluton	99.9889	28.0639	6628-588 11	218	0.02556	0.000844	0.282659	2.8e-05	0.282656	-4.45568	0.268552	0.990632
Cao et al., 2016	Pulang pluton	99.9889	28.0639	6628-588 13	216	0.017021	0.000567	0.282674	2.2e-05	0.282672	-3.92524	0.795396	0.77835
Cao et al., 2016	Pulang pluton	99.9889	28.0639	6628-588 14	219	0.023251	0.000765	0.28267	2.4e-05	0.282667	-4.06669	0.690906	0.849115
Cao et al., 2016	Pulang pluton	99.9889	28.0639	6628-588 15	216	0.029116	0.000954	0.282675	2.4e-05	0.282671	-3.88988	0.775449	0.849109
Cao et al., 2016	Pulang pluton	99.9889	28.0639	6628-588 16	208	0.023457	0.000761	0.282669	2.4e-05	0.282666	-4.10206	0.416537	0.849094
Cao et al., 2016	Pulang pluton	99.9889	28.0639	6628-588 17	210	0.023473	0.000857	0.282683	2.6e-05	0.28268	-3.60698	0.942055	0.919856
Cao et al., 2016	Pulang pluton	99.9889	28.0639	6628-588 18	219	0.017928	0.000615	0.282666	2.6e-05	0.282663	-4.20814	0.571131	0.919874
Cao et al., 2016	Pulang pluton	99.9889	28.0639	6628-588 19	219	0.018382	0.000616	0.282679	2.6e-05	0.282676	-3.74843	1.03092	0.919874
Cao et al., 2016	Pulang pluton	99.9889	28.0639	6628-588 20	217	0.017301	0.000562	0.282678	2.6e-05	0.282676	-3.78379	0.959542	0.91987
Cao et al., 2016	Pulang pluton	99.9889	28.0639	6628-588 22	217	0.025207	0.000829	0.282683	2.6e-05	0.28268	-3.60698	1.09809	0.91987
Cao et al., 2016	Pulang pluton	99.9889	28.0639	6628-588 24	211	0.034167	0.00109	0.282665	2.2e-05	0.282661	-4.24351	0.294408	0.778341
Cao et al., 2016	Pulang pluton	99.9869	28.0594	5618-135 05	215	0.030012	0.00101	0.282644	2.4e-05	0.28264	-4.98612	-0.350936	0.849107
Cao et al., 2016	Pulang pluton	99.9869	28.0594	5618-135 07	216	0.026275	0.000909	0.282596	2.2e-05	0.282592	-6.68352	-2.0131	0.77835
Cao et al., 2016	Pulang pluton	99.9869	28.0594	5618-135 08	217	0.026115	0.000903	0.282609	2.2e-05	0.282605	-6.22381	-1.53063	0.778352
Cao et al., 2016	Pulang pluton	99.9869	28.0594	5618-135 09	219	0.032372	0.001078	0.282626	2.4e-05	0.282622	-5.62265	-0.911175	0.849115
Cao et al., 2016	Pulang pluton	99.9869	28.0594	5618-135 10	215	0.020085	0.00068	0.282596	2e-05	0.282593	-6.68352	-2.00219	0.707589
Cao et al., 2016	Pulang pluton	99.9869	28.0594	5618-135 12	215	0.028203	0.000954	0.282618	2.6e-05	0.282614	-5.90555	-1.26283	0.919866
Cao et al., 2016	Pulang pluton	99.9869	28.0594	5618-135 14	216	0.02458	0.000861	0.282618	2.2e-05	0.282615	-5.90555	-1.22789	0.77835
Cao et al., 2016	Pulang pluton	99.9869	28.0594	5618-135 15	215	0.021896	0.000743	0.282609	2.6e-05	0.282606	-6.22381	-1.55122	0.919866
Cao et al., 2016	Pulang pluton	99.9869	28.0594	5618-135 16	215	0.016843	0.000574	0.282617	2.4e-05	0.282615	-5.94091	-1.24414	0.849107
Cao et al., 2016	Pulang pluton	99.9869	28.0594	5618-135 17	216	0.024944	0.000861	0.2826	2.6e-05	0.282597	-6.54207	-1.86472	0.919868
Cao et al., 2016	Pulang pluton	99.9869	28.0594	5618-135 18	216	0.020581	0.000733	0.282642	2.4e-05	0.282639	-5.05685	-0.360481	0.849109
Cao et al., 2016	Pulang pluton	99.9869	28.0594	5618-135 19	215	0.023933	0.000823	0.282632	2.4e-05	0.282629	-5.41047	-0.748879	0.849107
Cao et al., 2016	Pulang pluton	99.9869	28.0594	5618-135 20	215	0.025826	0.000921	0.282615	2.4e-05	0.282611	-6.01163	-1.36428	0.849107
Cao et al., 2016	Pulang pluton	99.9869	28.0594	5618-135 21	218	0.027067	0.000928	0.282621	2.2e-05	0.282617	-5.79946	-1.088	0.778353
Cao et al., 2016	Pulang pluton	99.9869	28.0594	5618-135 22	217	0.021008	0.000726	0.282637	2.2e-05	0.282634	-5.23366	-0.514577	0.778352
Cao et al., 2016	Pulang pluton	99.9869	28.0594	5618-135 23	217	0.018171	0.000623	0.282611	2.2e-05	0.282608	-6.15308	-1.41965	0.778352
Cao et al., 2016	Pulang pluton	99.9869	28.0594	5618-135 24	214	0.02646	0.000944	0.282617	2.2e-05	0.282613	-5.94091	-1.31844	0.778346
Cao et al., 2016	Pulang pluton	99.9869	28.0594	5618-135 25	215	0.016459	0.00058	0.282597	2e-05	0.282595	-6.64816	-1.95258	0.707589
Cao et al., 2016	Pulang pluton	99.9875	28.0397	0409-303 01	215	0.038361	0.001314	0.282634	2.8e-05	0.282629	-5.33975	-0.74799	0.990625
Cao et al., 2016	Pulang pluton	99.9875	28.0397	0409-303 02	216	0.02778	0.000943	0.282657	2e-05	0.282653	-4.52641	0.140189	0.707591
Cao et al., 2016	Pulang pluton	99.9875	28.0397	0409-303 03	217	0.041771	0.001449	0.28262	2.4e-05	0.282614	-5.83482	-1.21987	0.849111
Cao et al., 2016	Pulang pluton	99.9875	28.0397	0409-303 04	216	0.025873	0.000913	0.282639	2.4e-05	0.282635	-5.16293	-0.492353	0.849109
Cao et al., 2016	Pulang pluton	99.9875	28.0397	0409-303 05	214	0.025413	0.000884	0.282635	2.2e-05	0.282631	-5.30438	-0.673117	0.778346
Cao et al., 2016	Pulang pluton	99.9875	28.0397	0409-303 06	214	0.023546	0.000833	0.28262	2.4e-05	0.282617	-5.83482	-1.19658	0.849105
Cao et al., 2016	Pulang pluton	99.9875	28.0397	0409-303 07	215	0.01447	0.000526	0.282643	2.4e-05	0.282641	-5.02148	-0.317442	0.849107
Cao et al., 2016	Pulang pluton	99.9875	28.0397	0409-303 08	216	0.033878	0.001175	0.282622	2.6e-05	0.282617	-5.7641	-1.13126	0.919868
Cao et al., 2016	Pulang pluton	99.9875	28.0397	0409-303 09	215	0.034674	0.001189	0.282585	2.8e-05	0.28258	-7.07251	-2.4638	0.990625
Cao et al., 2016	Pulang pluton	99.9875	28.0397	0409-303 10	215	0.033386	0.001166	0.282623	2.4e-05	0.282618	-5.72873	-1.1161	0.849107
Cao et al., 2016	Pulang pluton	99.9875	28.0397	0409-303 11	217	0.030991	0.001076	0.28267	2.6e-05	0.282666	-4.06669	0.602681	0.91987
Cao et al., 2016	Pulang pluton	99.9875	28.0397	0409-303 12	215	0.027805	0.000993	0.282617	2.2e-05	0.282613	-5.94091	-1.30376	0.778348
Cao et al., 2016	Pulang pluton	99.9875	28.0397	0409-303 13	216	0.02608	0.000906	0.282636	2.4e-05	0.282632	-5.26902	-0.597491	0.849109
Cao et al., 2016	Pulang pluton	99.9875	28.0397	0409-303 14	215	0.036045	0.001282	0.282616	2.4e-05	0.282611	-5.97627	-1.38027	0.849107
Cao et al., 2016	Pulang pluton	99.9875	28.0397	0409-303 15	215	0.02876	0.001061	0.282631	2.6e-05	0.282627	-5.44583	-0.818126	0.919866
Cao et al., 2016	Pulang pluton	99.9875	28.0397	0409-303 16	216	0.037758	0.001315	0.282602	2.6e-05	0.282597	-6.47135	-1.85887	0.919868
Cao et al., 2016	Xuejiping pluton	99.8103	28.0108	XJPB 01	214	0.023396	0.000844	0.282718	3.8e-05	0.282715	-2.36929	2.26904	1.34442
Cao et al., 2016	Xuejiping pluton	99.8103	28.0108	XJPB 02	218	0.023035	0.000892	0.282703	3.2e-05	0.282699	-2.89973	1.81833	1.13215
Cao et al., 2016	Xuejiping pluton	99.8103	28.0108	XJPB 03	215	0.02263	0.000932	0.282681	2.6e-05	0.282677	-3.67771	0.969203	0.919866
Cao et al., 2016	Xuejiping pluton	99.8103	28.0108	XJPB 04	213	0.01819	0.000754	0.2827	4e-05	0.282697	-3.00582	1.62317	1.41517
Cao et al., 2016	Xuejiping pluton	99.8103	28.0108	XJPB 05	215	0.024294	0.000911	0.282713	4.2e-05	0.282709	-2.5461	2.10433	1.48594
Cao et al., 2016	Xuejiping pluton	99.8103	28.0108	XJPB 06	217	0.022245	0.000804	0.282703	3.2e-05	0.2827	-2.89973	1.80927	1.13215
Cao et al., 2016	Xuejiping pluton	99.8103	28.0108	XJPB 10	215	0.020094	0.000821	0.282745	3.4e-05	0.282742	-1.4145	3.24928	1.2029
Cao et al., 2016	Xuejiping pluton	99.8103	28.0108	XJPB 12	213	0.027021	0.000943	0.28273	4.8e-05	0.282726	-1.94494	2.65791	1.69821
Cao et al., 2016	Xuejiping pluton	99.8103	28.0108	XJPB 13	214	0.033281	0.001308	0.282725	6e-05	0.28272	-2.12175	2.45097	2.12276
Cao et al., 2016	Xuejiping pluton	99.8103	28.0108	XJPB 14	217	0.024595	0.000954	0.282697	3.2e-05	0.282693	-3.1119	1.57545	1.13215
Cao et al., 2016	Xuejiping pluton	99.8103	28.0108	XJPB 15	213	0.030194	0.001174	0.282711	3.8e-05	0.282706	-2.61683	1.95313	1.34441
Cao et al., 2016	Xuejiping pluton	99.8103	28.0108	XJPB 17	218	0.034407	0.00136	0.282746	3.8e-05	0.28274	-1.37914	3.27213	1.34443
Cao et al., 2016	Xuejiping pluton	99.8103	28.0108	XJPB 21	215	0.024945	0.00098	0.282688	3e-05	0.282684	-3.43017	1.21003	1.06138
Cao et al., 2016	Xuejiping pluton	99.8103	28.0108	XJPB 22	213	0.028191	0.001155	0.282721	3.6e-05	0.282716	-2.2632	2.3096	1.27365
Cao et al., 2016	Xuejiping pluton	99.8103	28.0108	XJPB 23	216	0.024273	0.000956	0.282708	3.8e-05	0.282704	-2.72292	1.94269	1.34442
Cao et al., 2016	Xuejiping pluton	99.8103	28.0108	XJPB 24	213	0.022935	0.000958	0.282702	3e-05	0.282698	-2.93509	1.66517	1.06138
Cao et al., 2016	Hongshan	99.8908	28.1233	HS-01 01	210	0.042186	0.001395	0.282821	7.4e-05	0.282816	1.27305	5.74959	2.61805
Cao et al., 2016	Hongshan	99.8908	28.1233	HS-01 04	218	0.041707	0.001328	0.282756	2.8e-05	0.282751	-1.02551	3.63055	0.990632
Cao et al., 2016	Hongshan	99.8908	28.1233	HS-01 09	217	0.05173	0.001823	0.282758	4.2e-05	0.282751	-0.954789	3.6088	1.48594
Cao et al., 2016	Xuejiping pluton	99.7978	28.1158	LNTY 01	219	0.015703	0.000664	0.282645	2.6e-05	0.282642	-4.95076	-0.178948	0.919874
Cao et al., 2016	Xuejiping pluton	99.7978	28.1158	LNTY 02	220	0.013157	0.000587	0.28265	2.4e-05	0.282648	-4.77394	0.0310088	0.849117
Cao et al., 2016	Xuejiping pluton	99.7978	28.1158	LNTY 03	216	0.018627	0.000833	0.282645	2.4e-05	0.282642	-4.95076	-0.268639	0.849109
Cao et al., 2016	Xuejiping pluton	99.7978	28.1158	LNTY 04	219	0.017558	0.00072	0.282625	2.4e-05	0.282622	-5.65801	-0.894661	0.849115
Cao et al., 2016	Xuejiping pluton	99.7978	28.1158	LNTY 07	217	0.016495	0.000708	0.282652	3e-05	0.282649	-4.70322	0.0187026	1.06139
Cao et al., 2016	Xuejiping pluton	99.7978	28.1158	LNTY 08	217	0.01806	0.000777	0.282635	2.8e-05	0.282632	-5.30438	-0.592661	0.990629
Cao et al., 2016	Xuejiping pluton	99.7978	28.1158	LNTY 09	214	0.018346	0.000754	0.282631	2.6e-05	0.282628	-5.44583	-0.796221	0.919864
Cao et al., 2016	Xuejiping pluton	99.7978	28.1158	LNTY 10	213	0.014078	0.000569	0.282639	2.4e-05	0.282637	-5.16293	-0.508888	0.849103
Cao et al., 2016	Xuejiping pluton	99.7978	28.1158	LNTY 11	216	0.02079	0.000863	0.282656	2.6e-05	0.282653	-4.56177	0.116247	0.919868
Cao et al., 2016	Xuejiping pluton	99.7978	28.1158	LNTY 14	214	0.015581	0.000662	0.282651	2.8e-05	0.282648	-4.73858	-0.0756032	0.990623
Cao et al., 2016	Xuejiping pluton	99.7978	28.1158	LNTY 16	218	0.018153	0.000779	0.28267	2.8e-05	0.282667	-4.06669	0.667107	0.990632
Cao et al., 2016	Xuejiping pluton	99.7978	28.1158	LNTY 17	219	0.021528	0.000837	0.282631	2.4e-05	0.282628	-5.44583	-0.699342	0.849115
Cao et al., 2016	Xuejiping pluton	99.7978	28.1158	LNTY 19	214	0.016684	0.00069	0.282653	2.2e-05	0.28265	-4.66786	-0.00881024	0.778346
Cao et al., 2016	Xuejiping pluton	99.7978	28.1158	LNTY 20	216	0.016436	0.000665	0.28265	2.6e-05	0.282647	-4.77394	-0.0677235	0.919868
Cao et al., 2016	Xuejiping pluton	99.7978	28.1158	LNTY 21	214	0.018687	0.000772	0.282654	2.8e-05	0.282651	-4.63249	0.0149549	0.990623
Cao et al., 2016	Xuejiping pluton	99.7978	28.1158	LNTY 23	216	0.015671	0.000679	0.282634	2.2e-05	0.282631	-5.33975	-0.635798	0.77835
Cao et al., 2016	Xuejiping pluton	99.7978	28.1158	LNTY 24	220	0.014921	0.000605	0.282621	2.8e-05	0.282619	-5.79946	-0.997628	0.990636
Cao et al., 2016	Xuejiping pluton	99.8694	27.9581	CD-4 01	216	0.024852	0.00088	0.282674	3.2e-05	0.28267	-3.92524	0.750648	1.13215
Cao et al., 2016	Xuejiping pluton	99.8694	27.9581	CD-4 02	213	0.023147	0.000876	0.282664	3.2e-05	0.282661	-4.27887	0.332316	1.13214
Cao et al., 2016	Xuejiping pluton	99.8694	27.9581	CD-4 03	215	0.015592	0.000578	0.282718	4.8e-05	0.282716	-2.36929	2.32862	1.69821
Cao et al., 2016	Xuejiping pluton	99.8694	27.9581	CD-4 04	214	0.029279	0.001063	0.282673	3.2e-05	0.282669	-3.96061	0.645947	1.13214
Cao et al., 2016	Xuejiping pluton	99.8694	27.9581	CD-4 05	214	0.012379	0.000476	0.282686	3e-05	0.282684	-3.50089	1.18902	1.06138
Cao et al., 2016	Xuejiping pluton	99.8694	27.9581	CD-4 07	214	0.044604	0.001475	0.282719	3.4e-05	0.282713	-2.33393	2.21504	1.2029
Cao et al., 2016	Xuejiping pluton	99.8694	27.9581	CD-4 09	215	0.018947	0.000638	0.282684	2.8e-05	0.282681	-3.57162	1.11718	0.990625
Cao et al., 2016	Xuejiping pluton	99.8694	27.9581	CD-4 10	216	0.045662	0.001527	0.282671	2.8e-05	0.282665	-4.03133	0.552012	0.990627
Cao et al., 2016	Xuejiping pluton	99.8694	27.9581	CD-4 13	214	0.029703	0.001056	0.282701	5.8e-05	0.282697	-2.97045	1.63756	2.052
Cao et al., 2016	Xuejiping pluton	99.8694	27.9581	CD-4 15	217	0.02996	0.00101	0.282664	2.6e-05	0.28266	-4.27887	0.399883	0.91987
Cao et al., 2016	Xuejiping pluton	99.8694	27.9581	CD-4 16	212	0.023604	0.00086	0.282679	3e-05	0.282676	-3.74843	0.843548	1.06138
Cao et al., 2016	Xuejiping pluton	99.8694	27.9581	CD-4 19	214	0.025162	0.000938	0.282687	2.8e-05	0.282683	-3.46553	1.15896	0.990623
Cao et al., 2016	Xuejiping pluton	99.8694	27.9581	CD-4 22	212	0.022091	0.000799	0.282647	2.6e-05	0.282644	-4.88003	-0.280029	0.91986
Cao et al., 2016	Xuejiping pluton	99.8694	27.9581	CD-4 23	213	0.019129	0.000726	0.282691	2.8e-05	0.282688	-3.32408	1.3087	0.990621
Cao et al., 2016	Xuejiping pluton	99.8694	27.9581	CD-4 24	213	0.016864	0.000615	0.282685	2.8e-05	0.282683	-3.53626	1.11208	0.990621
Cao et al., 2016	Xuejiping pluton	99.8694	27.9581	CD-4 25	215	0.016681	0.000596	0.282658	2.4e-05	0.282656	-4.49104	0.203289	0.849107
Cao et al., 2016	Cilai pluton	99.8369	27.9814	CL-01 01	216	0.038041	0.001218	0.282633	2.6e-05	0.282628	-5.37511	-0.748235	0.919868
Cao et al., 2016	Cilai pluton	99.8369	27.9814	CL-01 02	217	0.037806	0.001217	0.282639	2.6e-05	0.282634	-5.16293	-0.514339	0.91987
Cao et al., 2016	Cilai pluton	99.8369	27.9814	CL-01 03	216	0.027694	0.000886	0.282601	2.2e-05	0.282597	-6.50671	-1.83292	0.77835
Cao et al., 2016	Cilai pluton	99.8369	27.9814	CL-01 04	217	0.037794	0.001215	0.282653	2.6e-05	0.282648	-4.66786	-0.0187369	0.91987
Cao et al., 2016	Cilai pluton	99.8369	27.9814	CL-01 05	216	0.034635	0.001101	0.282646	2.4e-05	0.282642	-4.9154	-0.271574	0.849109
Cao et al., 2016	Cilai pluton	99.8369	27.9814	CL-01 06	219	0.033663	0.001094	0.282661	2.4e-05	0.282657	-4.38496	0.324798	0.849115
Cao et al., 2016	Cilai pluton	99.8369	27.9814	CL-01 07	216	0.028715	0.00091	0.282629	2.4e-05	0.282625	-5.51656	-0.84572	0.849109
Cao et al., 2016	Cilai pluton	99.8369	27.9814	CL-01 08	216	0.027489	0.00088	0.282667	2.4e-05	0.282663	-4.17278	0.502992	0.849109
Cao et al., 2016	Cilai pluton	99.8369	27.9814	CL-01 09	217	0.036845	0.001183	0.282645	2.8e-05	0.28264	-4.95076	-0.297178	0.990629
Cao et al., 2016	Cilai pluton	99.8369	27.9814	CL-01 10	216	0.036704	0.00116	0.282656	2.8e-05	0.282651	-4.56177	0.0737867	0.990627
Cao et al., 2016	Cilai pluton	99.8369	27.9814	CL-01 11	215	0.027779	0.000913	0.282646	2.4e-05	0.282642	-4.9154	-0.266374	0.849107
Cao et al., 2016	Cilai pluton	99.8369	27.9814	CL-01 12	215	0.028841	0.000909	0.282616	2.2e-05	0.282612	-5.97627	-1.32719	0.778348
Cao et al., 2016	Cilai pluton	99.8369	27.9814	CL-01 13	216	0.027464	0.000871	0.282637	2.6e-05	0.282633	-5.23366	-0.557108	0.919868
Cao et al., 2016	Cilai pluton	99.8369	27.9814	CL-01 14	216	0.026884	0.000895	0.28264	2.4e-05	0.282636	-5.12757	-0.454401	0.849109
Cao et al., 2016	Cilai pluton	99.8369	27.9814	CL-01 15	215	0.024039	0.000792	0.282627	2.4e-05	0.282624	-5.58728	-0.921365	0.849107
Cao et al., 2016	Cilai pluton	99.8369	27.9814	CL-01 16	216	0.031463	0.000989	0.282661	2.8e-05	0.282657	-4.38496	0.275131	0.990627
Cao et al., 2016	Cilai pluton	99.8369	27.9814	CL-01 17	215	0.035484	0.001116	0.282661	2.4e-05	0.282657	-4.38496	0.235431	0.849107
Cao et al., 2016	Cilai pluton	99.8369	27.9814	CL-01 18	216	0.026417	0.000815	0.282635	2.4e-05	0.282632	-5.30438	-0.619861	0.849109
Cao et al., 2016	Cilai pluton	99.8369	27.9814	CL-01 19	216	0.040231	0.001188	0.28265	2.4e-05	0.282645	-4.77394	-0.142494	0.849109
Cao et al., 2016	Cilai pluton	99.8369	27.9814	CL-01 21	216	0.036956	0.001179	0.282635	2.4e-05	0.28263	-5.30438	-0.6719	0.849109
Jiang et al., 2015	Benge stocks	99.922	27.697	BGM2 8	210	0.0637	0.0017	0.282546	2.6e-05	0.282539	-8.45165	-4.02204	0.919856
Jiang et al., 2015	Benge stocks	99.922	27.697	BGM2 13	229	0.0844	0.0024	0.282757	2.6e-05	0.282747	-0.990152	3.73898	0.919895
Jiang et al., 2015	Benge stocks	99.922	27.697	BGM2 14	232	0.0666	0.0017	0.282542	1.8e-05	0.282535	-8.5931	-3.69826	0.636854
Jiang et al., 2015	Benge stocks	99.922	27.697	BGM2 15	218	0.1481	0.0039	0.282599	2e-05	0.282583	-6.57744	-2.29518	0.707594
Jiang et al., 2015	Benge stocks	99.922	27.697	BGM2 16	224	0.1721	0.0045	0.282643	2.5e-05	0.282624	-5.02148	-0.709254	0.884504
Jiang et al., 2015	Benge stocks	99.922	27.697	BGM2 18	216	0.0767	0.0021	0.282595	1.8e-05	0.282587	-6.71889	-2.21875	0.636832
Jiang et al., 2015	Benge stocks	99.922	27.697	BGM2 19	214	0.0687	0.0019	0.282512	2.5e-05	0.282504	-9.65398	-5.16868	0.884485
Jiang et al., 2015	Benge stocks	99.922	27.697	BGM2 21	218	0.074	0.0021	0.28258	2.6e-05	0.282571	-7.24932	-2.70767	0.919872
Jiang et al., 2015	Benge stocks	99.922	27.697	BGM2 24	217	0.1239	0.0032	0.28249	2.3e-05	0.282477	-10.432	-6.07072	0.813731
Jiang et al., 2015	Benge stocks	99.922	27.697	BGM2 25	212	0.0977	0.0024	0.282595	2.2e-05	0.282585	-6.71889	-2.34438	0.778343
Jiang et al., 2015	Benge stocks	99.922	27.697	RGM2 29	218	0.0645	0.0018	0.282595	2.2e-05	0.282588	-6.71889	-2.13369	0.778353
Jiang et al., 2015	Benge stocks	99.922	27.697	BGM29.2 4	220	0.0321	0.0008	0.282658	2.2e-05	0.282655	-4.49104	0.283031	0.778357
Jiang et al., 2015	Benge stocks	99.922	27.697	BGM29.2 6	212	0.029	0.0008	0.282701	1.4e-05	0.282698	-2.97045	1.63031	0.495309
Jiang et al., 2015	Benge stocks	99.922	27.697	BGM29.2 8	208	0.0259	0.0007	0.282675	1.6e-05	0.282672	-3.88988	0.637207	0.566063
Jiang et al., 2015	Benge stocks	99.922	27.697	BGM29.2 9	226	0.0431	0.0012	0.28269	1.9e-05	0.282685	-3.35944	1.4859	0.672226
Jiang et al., 2015	Benge stocks	99.922	27.697	BGM29.2 11	215	0.0268	0.0008	0.282696	2.4e-05	0.282693	-3.14727	1.51868	0.849107
Jiang et al., 2015	Benge stocks	99.922	27.697	BGM29.2 12	212	0.039	0.0011	0.282688	1.8e-05	0.282684	-3.43017	1.12829	0.636826
Jiang et al., 2015	Benge stocks	99.922	27.697	BGM29.2 14	210	0.0425	0.0012	0.282682	1.9e-05	0.282677	-3.64234	0.859005	0.672202
Jiang et al., 2015	Benge stocks	99.922	27.697	BGM29.2 15	208	0.0593	0.0017	0.282665	2.4e-05	0.282658	-4.24351	0.145762	0.849094
Jiang et al., 2015	Benge stocks	99.922	27.697	BGM29.2 16	221	0.0194	0.0006	0.282649	1.7e-05	0.282647	-4.80931	0.0156238	0.601459
Jiang et al., 2015	Benge stocks	99.922	27.697	BGM29.2 17	213	0.0319	0.0009	0.28273	1.7e-05	0.282726	-1.94494	2.66397	0.601448
Jiang et al., 2015	Benge stocks	99.922	27.697	BGM29.2 18	208	0.0204	0.0006	0.282636	2.5e-05	0.282634	-5.26902	-0.728804	0.884473
Jiang et al., 2015	Benge stocks	99.922	27.697	BGM29.2 20	212	0.0438	0.0011	0.282632	2e-05	0.282628	-5.41047	-0.85295	0.707585
Jiang et al., 2015	Benge stocks	99.922	27.697	BGM29.2 22	215	0.0517	0.0013	0.282669	2.1e-05	0.282664	-4.10206	0.492283	0.742969
Jiang et al., 2015	Benge stocks	99.922	27.697	BGM29.2 25	218	0.0414	0.0012	0.282763	2e-05	0.282758	-0.777976	3.89667	0.707594
Jiang et al., 2015	Benge stocks	99.922	27.697	BGM29.2 27	217	0.0389	0.001	0.282647	2.5e-05	0.282643	-4.88003	-0.200135	0.884491
Jiang et al., 2015	Benge stocks	99.922	27.697	BGM29.2 29	208	0.0486	0.0012	0.282717	3.1e-05	0.282712	-2.40465	2.05429	1.09675
Jiang et al., 2015	Benge stocks	99.922	27.697	BGM29.2 30	210	0.0604	0.0014	0.282667	2.6e-05	0.282662	-4.17278	0.300522	0.919856
Jiang et al., 2015	Benge stocks	99.922	27.697	BGM29.2 31	222	0.0486	0.0014	0.282613	3e-05	0.282607	-6.08236	-1.35372	1.0614
Jiang et al., 2015	Benge stocks	99.922	27.697	BGM29.2 32	208	0.0305	0.0008	0.282674	2.5e-05	0.282671	-3.92524	0.588063	0.884473
Peng et al., 2014	Xuejiping pluton	99.8124	28.0074	SJ171 01	219.3	0.018655	0.000859	0.282776	4.6e-05	0.282772	-0.318263	4.43405	1.62747
Peng et al., 2014	Xuejiping pluton	99.8124	28.0074	SJ171 02	247.6	0.022351	0.001049	0.282769	4.8e-05	0.282764	-0.565801	4.77026	1.69834
Peng et al., 2014	Xuejiping pluton	99.8124	28.0074	SJ171 03	219.3	0.015645	0.000744	0.282668	5.4e-05	0.282665	-4.13742	0.629729	1.91051
Peng et al., 2014	Xuejiping pluton	99.8124	28.0074	SJ171 04	218.2	0.018271	0.000821	0.282735	5.6e-05	0.282732	-1.76813	2.96508	1.98126
Peng et al., 2014	Xuejiping pluton	99.8124	28.0074	SJ171 05	214.9	0.018617	0.000855	0.282661	6.6e-05	0.282658	-4.38496	0.2704	2.33504
Peng et al., 2014	Xuejiping pluton	99.8124	28.0074	SJ171 06	213.3	0.013095	0.000605	0.282712	4.6e-05	0.28271	-2.58147	2.07529	1.62745
Peng et al., 2014	Xuejiping pluton	99.8124	28.0074	SJ171 07	218.4	0.018772	0.000875	0.282717	4.6e-05	0.282713	-2.40465	2.32479	1.62747
Peng et al., 2014	Xuejiping pluton	99.8124	28.0074	SJ171 08	219.3	0.02125	0.000975	0.28269	5.2e-05	0.282686	-3.35944	1.37455	1.83975
Peng et al., 2014	Xuejiping pluton	99.8124	28.0074	SJ171 09	247.4	0.023926	0.001099	0.282708	5.8e-05	0.282703	-2.72292	2.59945	2.05216
Peng et al., 2014	Xuejiping pluton	99.8124	28.0074	SJ171 10	245.5	0.017219	0.000818	0.282667	6.2e-05	0.282663	-4.17278	1.15347	2.19368
Peng et al., 2014	Xuejiping pluton	99.8124	28.0074	SJ171 11	211.9	0.022988	0.001088	0.282657	7.2e-05	0.282653	-4.52641	0.031058	2.5473
Peng et al., 2014	Xuejiping pluton	99.8124	28.0074	SJ171 12	217.2	0.016205	0.000778	0.282646	4e-05	0.282643	-4.9154	-0.199276	1.41519
Peng et al., 2014	Xuejiping pluton	99.8124	28.0074	SJ171 13	211.6	0.016954	0.000798	0.282678	8e-05	0.282675	-3.78379	0.808166	2.83034
Peng et al., 2014	Xuejiping pluton	99.8124	28.0074	SJ171 14	215.9	0.016703	0.000802	0.282637	6e-05	0.282634	-5.23366	-0.549419	2.12277
Peng et al., 2014	Xuejiping pluton	99.8124	28.0074	SJ171 15	217.2	0.018761	0.000849	0.282575	0.000118	0.282572	-7.42614	-2.72144	4.1748
Peng et al., 2014	Xuejiping pluton	99.8124	28.0074	SJ171 16	214.1	0.016196	0.000761	0.282654	6.6e-05	0.282651	-4.63249	0.0186907	2.33504
Peng et al., 2014	Xuejiping pluton	99.8124	28.0074	SJ171 17	215.3	0.015825	0.000718	0.28265	8.8e-05	0.282647	-4.77394	-0.0905656	3.11339
Peng et al., 2014	Xuejiping pluton	99.8124	28.0074	SJ171 18	217.2	0.018243	0.000828	0.282603	0.00012	0.2826	-6.43598	-1.72779	4.24556
Peng et al., 2014	Xuejiping pluton	99.8124	28.0074	SJ171 19	220.5	0.022574	0.001035	0.28261	8.6e-05	0.282606	-6.18845	-1.43862	3.04267
Peng et al., 2014	Xuejiping pluton	99.8124	28.0074	SJ171 20	214.4	0.02084	0.000961	0.28261	7.2e-05	0.282606	-6.18845	-1.55985	2.54732
Peng et al., 2014	Xuejiping pluton	99.8124	28.0074	SJ171 21	217.4	0.024464	0.00108	0.282673	5.2e-05	0.282669	-3.96061	0.716873	1.83974
Peng et al., 2014	Xuejiping pluton	99.8124	28.0074	SJ171 22	218.7	0.022201	0.001015	0.282579	5.4e-05	0.282575	-7.28469	-2.57137	1.91051
Peng et al., 2014	Xuejiping pluton	99.8124	28.0074	SJ171 23	247.6	0.017371	0.000803	0.282633	5.6e-05	0.282629	-5.37511	-0.00136595	1.98139
Peng et al., 2014	Xuejiping pluton	99.8124	28.0074	SJ171 24	215.5	0.018301	0.000838	0.282603	5.8e-05	0.2826	-6.43598	-1.76616	2.05201
Peng et al., 2014	Xuejiping pluton	99.8112	28.1249	SJ282 02	217.3	0.02505	0.001075	0.282627	6e-05	0.282623	-5.58728	-0.912028	2.12278
Peng et al., 2014	Xuejiping pluton	99.8112	28.1249	SJ282 03	214.8	0.014158	0.000618	0.282624	5.2e-05	0.282622	-5.69337	-1.00712	1.83973
Peng et al., 2014	Xuejiping pluton	99.8112	28.1249	SJ282 04	219.8	0.02645	0.001117	0.282632	7.6e-05	0.282627	-5.41047	-0.687315	2.68887
Peng et al., 2014	Xuejiping pluton	99.8112	28.1249	SJ282 05	218.1	0.017083	0.000739	0.282628	4.6e-05	0.282625	-5.55192	-0.810889	1.62747
Peng et al., 2014	Xuejiping pluton	99.8112	28.1249	SJ282 06	216.4	0.021567	0.000914	0.282596	6.6e-05	0.282592	-6.68352	-2.00515	2.33505
Peng et al., 2014	Xuejiping pluton	99.8112	28.1249	SJ282 07	217.9	0.027639	0.001172	0.282655	4.6e-05	0.28265	-4.59713	0.0775548	1.62747
Peng et al., 2014	Xuejiping pluton	99.8112	28.1249	SJ282 08	215	0.020307	0.000852	0.282674	6e-05	0.282671	-3.92524	0.732931	2.12277
Peng et al., 2014	Xuejiping pluton	99.8112	28.1249	SJ282 09	206.3	0.023395	0.00095	0.282709	0.00021	0.282705	-2.68755	1.76887	7.42954
Peng et al., 2014	Xuejiping pluton	99.8112	28.1249	SJ282 10	209.7	0.011816	0.000515	0.28264	9.4e-05	0.282638	-5.12757	-0.538294	3.32563
Peng et al., 2014	Xuejiping pluton	99.8112	28.1249	SJ282 11	214.8	0.016382	0.000714	0.282694	5e-05	0.282691	-3.21799	1.4558	1.76897
Peng et al., 2014	Xuejiping pluton	99.8112	28.1249	SJ282 12	242.5	0.023449	0.001016	0.282662	5e-05	0.282657	-4.34959	0.879506	1.76908
Peng et al., 2014	Xuejiping pluton	99.8112	28.1249	SJ282 13	214.2	0.020442	0.000875	0.28253	0.000128	0.282526	-9.01745	-4.38234	4.52856
Peng et al., 2014	Xuejiping pluton	99.8112	28.1249	SJ282 14	218.2	0.021904	0.000923	0.282623	7e-05	0.282619	-5.72873	-1.01218	2.47658
Peng et al., 2014	Xuejiping pluton	99.8112	28.1249	SJ282 15	213.2	0.013211	0.000564	0.282664	6.8e-05	0.282662	-4.27887	0.380682	2.40579
Peng et al., 2014	Xuejiping pluton	99.8112	28.1249	SJ282 16	217	0.013687	0.000602	0.282732	6.8e-05	0.28273	-1.87422	2.8643	2.40581
Peng et al., 2014	Xuejiping pluton	99.8112	28.1249	SJ282 17	219.7	0.023981	0.00103	0.282628	0.00011	0.282624	-5.55192	-0.818337	3.89178
Peng et al., 2014	Xuejiping pluton	99.8112	28.1249	SJ282 18	214.6	0.018492	0.000797	0.282544	0.000124	0.282541	-8.52238	-3.86727	4.38705
Peng et al., 2014	Xuejiping pluton	99.8112	28.1249	SJ282 19	217.7	0.012074	0.000528	0.282641	6.8e-05	0.282639	-5.09221	-0.329267	2.40582
Peng et al., 2014	Xuejiping pluton	99.8112	28.1249	SJ282 21	208.5	0.020909	0.000912	0.282689	6.4e-05	0.282685	-3.39481	1.11417	2.26425
Peng et al., 2014	Xuejiping pluton	99.8112	28.1249	SJ282 22	208.5	0.016901	0.000771	0.282722	0.000116	0.282719	-2.22784	2.30113	4.10396
Peng et al., 2014	Xuejiping pluton	99.8029	28.018	SJ177 01	218	0.023539	0.00105	0.282646	6.8e-05	0.282642	-4.9154	-0.221108	2.40582
Peng et al., 2014	Xuejiping pluton	99.8029	28.018	SJ177 02	216.8	0.015546	0.000741	0.282616	6.8e-05	0.282613	-5.97627	-1.26406	2.40581
Peng et al., 2014	Xuejiping pluton	99.8029	28.018	SJ177 03	215.7	0.019049	0.000864	0.282578	8e-05	0.282575	-7.32005	-2.65001	2.83036
Peng et al., 2014	Xuejiping pluton	99.8029	28.018	SJ177 04	217.9	0.017457	0.000781	0.282608	5.8e-05	0.282605	-6.25917	-1.5289	2.05202
Peng et al., 2014	Xuejiping pluton	99.8029	28.018	SJ177 05	215.6	0.015539	0.000731	0.282635	9e-05	0.282632	-5.30438	-0.616571	3.18416
Peng et al., 2014	Xuejiping pluton	99.8029	28.018	SJ177 06	217	0.01737	0.000816	0.282652	5.6e-05	0.282649	-4.70322	0.00319081	1.98126
Peng et al., 2014	Xuejiping pluton	99.8029	28.018	SJ177 07	216.7	0.016198	0.000754	0.28263	8.6e-05	0.282627	-5.4812	-0.772791	3.04265
Peng et al., 2014	Xuejiping pluton	99.8029	28.018	SJ177 08	217.3	0.016586	0.000756	0.282599	7.4e-05	0.282596	-6.57744	-1.85678	2.61809
Peng et al., 2014	Xuejiping pluton	99.8029	28.018	SJ177 09	245.1	0.021188	0.000986	0.282592	0.000114	0.282587	-6.82497	-1.53613	4.03353
Peng et al., 2014	Xuejiping pluton	99.8029	28.018	SJ177 10	211.5	0.013272	0.000614	0.282629	5e-05	0.282627	-5.51656	-0.901834	1.76896
Peng et al., 2014	Xuejiping pluton	99.8029	28.018	SJ177 11	261.8	0.014331	0.000644	0.282649	9e-05	0.282646	-4.80931	0.901451	3.18448
Peng et al., 2014	Xuejiping pluton	99.8029	28.018	SJ177 12	213.4	0.013979	0.000617	0.282619	8.8e-05	0.282617	-5.87018	-1.21449	3.11338
Peng et al., 2014	Xuejiping pluton	99.8029	28.018	SJ177 13	217.4	0.017637	0.000803	0.282611	9.4e-05	0.282608	-6.15308	-1.43681	3.32569
Peng et al., 2014	Xuejiping pluton	99.8029	28.018	SJ177 14	252.1	0.020696	0.000945	0.282598	0.000126	0.282594	-6.6128	-1.1655	4.45818
Peng et al., 2014	Xuejiping pluton	99.8029	28.018	SJ177 15	214.1	0.013647	0.000621	0.282704	5e-05	0.282702	-2.86437	1.8075	1.76897
Peng et al., 2014	Xuejiping pluton	99.8029	28.018	SJ177 16	220.1	0.025214	0.001089	0.282656	8.8e-05	0.282652	-4.56177	0.172344	3.11343
Peng et al., 2014	Xuejiping pluton	99.8029	28.018	SJ177 17	219.2	0.02704	0.001216	0.282642	8e-05	0.282637	-5.05685	-0.360806	2.83038
Peng et al., 2014	Xuejiping pluton	99.8029	28.018	SJ177 18	215.5	0.019994	0.000925	0.282656	4e-05	0.282652	-4.56177	0.096548	1.41518
Peng et al., 2014	Xuejiping pluton	99.8029	28.018	SJ177 19	251.6	0.013109	0.000598	0.282604	6.8e-05	0.282601	-6.40062	-0.906236	2.406
Peng et al., 2014	Xuejiping pluton	99.8029	28.018	SJ177 20	253.2	0.020197	0.000949	0.282618	5.8e-05	0.282614	-5.90555	-0.434686	2.05218
Peng et al., 2014	Xuejiping pluton	99.8029	28.018	SJ177 21	212.4	0.019298	0.000861	0.282598	0.0002	0.282595	-6.6128	-2.01363	7.07585
Peng et al., 2014	Xuejiping pluton	99.796	28.0178	SJ186 01	218.8	0.029008	0.001294	0.282707	3.8e-05	0.282702	-2.75828	1.91899	1.34443
Peng et al., 2014	Xuejiping pluton	99.796	28.0178	SJ186 02	217.5	0.013135	0.000621	0.282781	3.2e-05	0.282778	-0.14145	4.60611	1.13215
Peng et al., 2014	Xuejiping pluton	99.796	28.0178	SJ186 06	216.8	0.019199	0.000875	0.282602	3e-05	0.282598	-6.47135	-1.7786	1.06139
Peng et al., 2014	Xuejiping pluton	99.796	28.0178	SJ186 07	215.1	0.017741	0.00084	0.282658	5e-05	0.282655	-4.49104	0.17074	1.76897
Peng et al., 2014	Xuejiping pluton	99.796	28.0178	SJ186 08	226.3	0.02137	0.001034	0.282689	3.6e-05	0.282685	-3.39481	1.48184	1.27369
Peng et al., 2014	Xuejiping pluton	99.796	28.0178	SJ186 09	216	0.018182	0.000857	0.282689	3.2e-05	0.282686	-3.39481	1.28463	1.13215
Peng et al., 2014	Xuejiping pluton	99.796	28.0178	SJ186 10	216.7	0.028251	0.001255	0.282622	3.2e-05	0.282617	-5.7641	-1.12768	1.13215
Peng et al., 2014	Xuejiping pluton	99.796	28.0178	SJ186 11	218	0.016121	0.000775	0.28268	2.8e-05	0.282677	-3.71307	1.02148	0.990632
Cao et al., 2018	Pulang pluton	99.9904	28.0529	537 1	216	0.000857	0.000857	0.282625	3.1e-05	0.282622	-5.65801	-0.979661	1.09677
Cao et al., 2018	Pulang pluton	99.9904	28.0529	537 2	216	0.0013	0.0013	0.282602	3.7e-05	0.282597	-6.47135	-1.85672	1.30904
Cao et al., 2018	Pulang pluton	99.9904	28.0529	537 3	216	0.001281	0.001281	0.282605	3.7e-05	0.2826	-6.36526	-1.74787	1.30904
Cao et al., 2018	Pulang pluton	99.9904	28.0529	537 4	216	0.001238	0.001238	0.282628	3.6e-05	0.282623	-5.55192	-0.927992	1.27366
Cao et al., 2018	Pulang pluton	99.9904	28.0529	537 5	216	0.001179	0.001179	0.28262	4.4e-05	0.282615	-5.83482	-1.20259	1.5567
Cao et al., 2018	Pulang pluton	99.9904	28.0529	537 6	216	0.00114	0.00114	0.28264	4.3e-05	0.282635	-5.12757	-0.489427	1.52132
Cao et al., 2018	Pulang pluton	99.9904	28.0529	537 7	216	0.00065	0.00065	0.282607	3.1e-05	0.282604	-6.29453	-1.5869	1.09677
Cao et al., 2018	Pulang pluton	99.9904	28.0529	537 8	216	0.00063	0.00063	0.28261	3.1e-05	0.282607	-6.18845	-1.4779	1.09677
Cao et al., 2018	Pulang pluton	99.9904	28.0529	537 9	216	0.002763	0.002763	0.282603	4e-05	0.282592	-6.43598	-2.0305	1.41518
Cao et al., 2018	Pulang pluton	99.9904	28.0529	537 10	216	0.00102	0.00102	0.282612	3.3e-05	0.282608	-6.11772	-1.4629	1.16752
Cao et al., 2018	Pulang pluton	99.9904	28.0529	537 11	216	0.000993	0.000993	0.282622	3e-05	0.282618	-5.7641	-1.10524	1.06139
Cao et al., 2018	Pulang pluton	99.9904	28.0529	537 12	216	0.000896	0.000896	0.282625	2.9e-05	0.282621	-5.65801	-0.985237	1.02601
Cao et al., 2018	Pulang pluton	99.9904	28.0529	537 13	216	0.001154	0.001154	0.282614	3.6e-05	0.282609	-6.047	-1.4113	1.27366
Cao et al., 2018	Pulang pluton	99.9904	28.0529	537 14	216	0.001101	0.001101	0.28257	4e-05	0.282566	-7.60295	-2.96042	1.41518
Cao et al., 2018	Pulang pluton	99.9904	28.0529	537 15	216	0.000885	0.000885	0.2826	3.2e-05	0.282596	-6.54207	-1.86815	1.13215
Cao et al., 2018	Pulang pluton	99.9904	28.0529	537 16	216	0.000873	0.000873	0.282596	3.8e-05	0.282592	-6.68352	-2.00796	1.34442
Cao et al., 2018	Pulang pluton	99.9904	28.0529	537 17	216	0.000659	0.000659	0.28263	3.4e-05	0.282627	-5.4812	-0.774456	1.2029
Cao et al., 2018	Pulang pluton	99.9904	28.0529	537 18	216	0.000962	0.000962	0.282629	3.4e-05	0.282625	-5.51656	-0.853154	1.2029
Cao et al., 2018	Pulang pluton	99.9904	28.0529	537 19	216	0.00314	0.00314	0.282643	3.5e-05	0.28263	-5.02148	-0.669216	1.23828
Cao et al., 2018	Pulang pluton	99.9904	28.0529	537 20	216	0.000838	0.000838	0.282612	3e-05	0.282609	-6.11772	-1.43688	1.06139
Cao et al., 2018	Pulang pluton	99.9904	28.0529	537 21	216	0.001307	0.001307	0.282602	2.5e-05	0.282597	-6.47135	-1.85772	0.884489
Cao et al., 2018	Pulang pluton	99.9904	28.0529	537 22	216	0.000736	0.000736	0.2826	2.7e-05	0.282597	-6.54207	-1.84685	0.955248
Cao et al., 2018	Pulang pluton	99.9904	28.0529	537 23	216	0.004301	0.004301	0.282576	3.7e-05	0.282559	-7.39077	-3.20563	1.30904
Cao et al., 2018	Pulang pluton	99.9904	28.0529	537 24	216	0.00137	0.00137	0.28261	3.3e-05	0.282604	-6.18845	-1.58369	1.16752
Cao et al., 2018	Pulang pluton	99.9904	28.0529	537 25	216	0.001147	0.001147	0.282623	3.7e-05	0.282618	-5.72873	-1.09188	1.30904
Cao et al., 2018	Pulang pluton	99.9904	28.0529	537 26.1	216	0.000573	0.000573	0.282623	2.7e-05	0.282621	-5.72873	-1.00982	0.955248
Cao et al., 2018	Pulang pluton	99.9904	28.0529	537 26.2	216	0.001051	0.001051	0.28256	3.1e-05	0.282556	-7.95657	-3.30707	1.09677
Cao et al., 2018	Pulang pluton	99.9904	28.0529	537 27.1	216	0.000614	0.000614	0.282618	2.3e-05	0.282616	-5.90555	-1.19258	0.813729
Cao et al., 2018	Pulang pluton	99.9904	28.0529	537 27.2	216	0.000905	0.000905	0.282594	4e-05	0.28259	-6.75425	-2.08329	1.41518
Cao et al., 2018	Pulang pluton	99.9909	28.0424	713 1	216	0.000767	0.000767	0.282608	3e-05	0.282605	-6.25917	-1.56825	1.06139
Cao et al., 2018	Pulang pluton	99.9909	28.0424	713 2	216	0.001095	0.001095	0.282615	3.9e-05	0.282611	-6.01163	-1.36748	1.3798
Cao et al., 2018	Pulang pluton	99.9909	28.0424	713 3	216	0.00098	0.00098	0.28263	2.6e-05	0.282626	-5.4812	-0.820348	0.919868
Cao et al., 2018	Pulang pluton	99.9909	28.0424	713 4	216	0.000662	0.000662	0.28262	3.2e-05	0.282617	-5.83482	-1.12868	1.13215
Cao et al., 2018	Pulang pluton	99.9909	28.0424	713 5	216	0.000839	0.000839	0.282607	3e-05	0.282604	-6.29453	-1.61392	1.06139
Cao et al., 2018	Pulang pluton	99.9909	28.0424	713 6	216	0.001106	0.001106	0.282641	2.9e-05	0.282637	-5.09221	-0.449186	1.02601
Cao et al., 2018	Pulang pluton	99.9909	28.0424	713 7	216	0.00092	0.00092	0.282621	2.8e-05	0.282617	-5.79946	-1.13019	0.990627
Cao et al., 2018	Pulang pluton	99.9909	28.0424	713 8	216	0.000957	0.000957	0.282595	2.9e-05	0.282591	-6.71889	-2.05534	1.02601
Cao et al., 2018	Pulang pluton	99.9909	28.0424	713 9	216	0.000804	0.000804	0.282598	3.5e-05	0.282595	-6.6128	-1.92733	1.23828
Cao et al., 2018	Pulang pluton	99.9909	28.0424	713 10	216	0.001174	0.001174	0.282618	3.4e-05	0.282613	-5.90555	-1.27264	1.2029
Cao et al., 2018	Pulang pluton	99.9909	28.0424	713 11	216	0.00071	0.00071	0.282592	3.3e-05	0.282589	-6.82497	-2.12617	1.16752
Cao et al., 2018	Pulang pluton	99.9909	28.0424	713 12	216	0.001099	0.001099	0.282586	3.2e-05	0.282582	-7.03715	-2.39406	1.13215
Cao et al., 2018	Pulang pluton	99.9909	28.0424	713 13	216	0.00148	0.00148	0.282599	6.6e-05	0.282593	-6.57744	-1.9886	2.33505
Cao et al., 2018	Pulang pluton	99.9909	28.0424	713 14	216	0.00075	0.00075	0.282627	3.3e-05	0.282624	-5.58728	-0.893605	1.16752
Cao et al., 2018	Pulang pluton	99.9909	28.0424	713 15	216	0.000912	0.000912	0.28257	2.8e-05	0.282566	-7.60295	-2.9334	0.990627
Cao et al., 2018	Pulang pluton	99.9909	28.0424	713 16	216	0.000661	0.000661	0.282586	2.8e-05	0.282583	-7.03715	-2.33144	0.990627
Cao et al., 2018	Pulang pluton	99.9909	28.0424	713 17	216	0.000995	0.000995	0.282595	3.5e-05	0.282591	-6.71889	-2.06078	1.23828
Cao et al., 2018	Pulang pluton	99.9909	28.0424	713 18	216	0.00106	0.00106	0.282585	2.9e-05	0.282581	-7.07251	-2.42386	1.02601
Cao et al., 2018	Pulang pluton	99.9909	28.0424	713 19	216	0.000887	0.000887	0.282606	3e-05	0.282602	-6.3299	-1.65616	1.06139
Cao et al., 2018	Pulang pluton	99.9909	28.0424	713 20	216	0.000896	0.000896	0.282626	3.6e-05	0.282622	-5.62265	-0.949857	1.27366
Cao et al., 2018	Pulang pluton	99.9909	28.0424	713 21	216	0.001052	0.001052	0.282607	2.9e-05	0.282603	-6.29453	-1.64437	1.02601
Cao et al., 2018	Pulang pluton	99.9909	28.0424	713 22	216	0.00074	0.00074	0.2826	2.7e-05	0.282597	-6.54207	-1.84742	0.955248
Cao et al., 2018	Pulang pluton	100.001	28.0512	E601-20 1	215.8	0.000829	0.000829	0.282566	3.3e-05	0.282563	-7.7444	-3.0674	1.16752
Cao et al., 2018	Pulang pluton	100.001	28.0512	E601-20 2	214	0.001028	0.001028	0.282598	3.8e-05	0.282594	-6.6128	-2.00255	1.34442
Cao et al., 2018	Pulang pluton	100.001	28.0512	E601-20 3	212	0.000675	0.000675	0.282565	3.1e-05	0.282562	-7.77976	-3.16373	1.09676
Cao et al., 2018	Pulang pluton	100.001	28.0512	E601-20 4	212.7	0.001088	0.001088	0.282592	2.9e-05	0.282588	-6.82497	-2.25135	1.026
Cao et al., 2018	Pulang pluton	100.001	28.0512	E601-20 5	219.3	0.0012	0.0012	0.282521	4.2e-05	0.282516	-9.33571	-4.63729	1.48595
Cao et al., 2018	Pulang pluton	100.001	28.0512	E601-20 6	215.6	0.000958	0.000958	0.282664	3.6e-05	0.28266	-4.27887	0.377042	1.27366
Cao et al., 2018	Pulang pluton	100.001	28.0512	E601-20 7	216.9	0.00105	0.00105	0.282523	7.8e-05	0.282519	-9.26499	-4.59655	2.75961
Cao et al., 2018	Pulang pluton	100.001	28.0512	E601-20 8	217.4	0.001432	0.001432	0.282537	3.3e-05	0.282531	-8.76991	-4.14541	1.16753
Cao et al., 2018	Pulang pluton	100.001	28.0512	E601-20 9	216.8	0.000879	0.000879	0.282589	3.4e-05	0.282585	-6.93106	-2.23911	1.20291
Cao et al., 2018	Pulang pluton	100.001	28.0512	E601-20 10	221.1	0.00078	0.00078	0.282549	3.2e-05	0.282546	-8.34556	-3.54652	1.13216
Cao et al., 2018	Pulang pluton	100.001	28.0512	E601-20 11	216.8	0.001074	0.001074	0.282547	3.7e-05	0.282543	-8.41629	-3.75304	1.30905
Cao et al., 2018	Pulang pluton	100.001	28.0512	E601-20 12	218.3	0.001024	0.001024	0.282603	3.7e-05	0.282599	-6.43598	-1.7322	1.30905
Cao et al., 2018	Pulang pluton	100.001	28.0512	E601-20 13	218.7	0.001105	0.001105	0.282561	5.2e-05	0.282556	-7.92121	-3.22124	1.83975
Cao et al., 2018	Pulang pluton	100.001	28.0512	E601-20 14	213.6	0.001517	0.001517	0.282533	4.5e-05	0.282527	-8.91136	-4.37998	1.59207
Cao et al., 2018	Pulang pluton	100.001	28.0512	E601-20 15	219.9	0.00236	0.00236	0.282494	8.1e-05	0.282484	-10.2905	-5.7485	2.86577
Cao et al., 2018	Pulang pluton	100.001	28.0512	E601-20 16	220.4	0.00117	0.00117	0.28252	9.9e-05	0.282515	-9.37108	-4.64467	3.50261
Yang et al., 2018	Pulang pluton	99.9926	28.046	13SBB2 1	240	0.0332933	0.00123966	0.282663	8.03817e-06	0.282658	-4.29956	0.83997	0.284402
Yang et al., 2018	Pulang pluton	99.9926	28.046	13SBB2 2	242	0.0338342	0.0012574	0.282678	8.55304e-06	0.282672	-3.79698	1.38293	0.30262
Yang et al., 2018	Pulang pluton	99.9926	28.046	13SBB2 3	236	0.0346789	0.00132053	0.282674	8.9358e-06	0.282668	-3.93471	1.10649	0.316159
Yang et al., 2018	Pulang pluton	99.9926	28.046	13SBB2 4	226	0.026294	0.00101958	0.282625	9.92113e-06	0.282621	-5.65313	-0.781942	0.351013
Yang et al., 2018	Pulang pluton	99.9926	28.046	13SBB2 5	226	0.0215143	0.000832568	0.282668	8.08736e-06	0.282664	-4.13731	0.762612	0.286134
Yang et al., 2018	Pulang pluton	99.9926	28.046	13SBB2 6	239	0.0293342	0.0011582	0.282631	8.34403e-06	0.282626	-5.43116	-0.300812	0.295223
Yang et al., 2018	Pulang pluton	99.9926	28.046	13SBB2 7	238	0.0302125	0.00112415	0.282663	6.42005e-06	0.282658	-4.3037	0.811085	0.227149
Yang et al., 2018	Pulang pluton	99.9926	28.046	13SBB2 8	248	0.0304551	0.00116207	0.282632	1.0273e-05	0.282627	-5.40285	-0.0793758	0.363481
Yang et al., 2018	Pulang pluton	99.9926	28.046	13SBB2 9	230	0.0330009	0.00122301	0.282651	8.81033e-06	0.282645	-4.74987	0.177247	0.311715
Yang et al., 2018	Pulang pluton	99.9926	28.046	13SBB2 10	228	0.0275701	0.00103836	0.282627	8.47298e-06	0.282623	-5.57043	-0.658814	0.299778
Yang et al., 2018	Pulang pluton	99.9926	28.046	13SBB2 11	217	0.0275589	0.0010343	0.282641	8.34072e-06	0.282637	-5.08388	-0.409003	0.295091
Yang et al., 2018	Pulang pluton	99.9926	28.046	13SBB2 12	241	0.0248706	0.000959835	0.282668	9.94956e-06	0.282664	-4.12977	1.07598	0.35203
Yang et al., 2018	Pulang pluton	99.9926	28.046	13SBB2 13	218	0.0298392	0.00110993	0.282668	8.26201e-06	0.282664	-4.13291	0.553104	0.292307
Yang et al., 2018	Pulang pluton	99.9926	28.046	13SBB2 14	239	0.0320381	0.00120526	0.282665	9.05234e-06	0.282659	-4.2498	0.873722	0.320284
Yang et al., 2018	Pulang pluton	99.9926	28.046	13SBB2 15	243	0.031204	0.00116275	0.282665	7.11445e-06	0.28266	-4.24449	0.971868	0.251721
Yang et al., 2018	Pulang pluton	99.9926	28.046	13SBB2 16	244	0.0276734	0.0010303	0.282672	8.51869e-06	0.282667	-3.99974	1.25968	0.301406
Yang et al., 2018	Pulang pluton	99.9926	28.046	13SBB2 17	241	0.0370087	0.00136824	0.282663	9.15247e-06	0.282657	-4.3253	0.815175	0.323828
Yang et al., 2018	Pulang pluton	99.9926	28.046	13SBB2 18	239	0.0270042	0.00106026	0.282632	8.85535e-06	0.282627	-5.42785	-0.282008	0.313314
Yang et al., 2018	Pulang pluton	99.9926	28.046	13SBB2 19	231	0.0303029	0.00121435	0.282653	8.82489e-06	0.282647	-4.68481	0.265148	0.312231
Yang et al., 2018	Pulang pluton	99.9926	28.046	13SBB2 20	237	0.0207457	0.000788575	0.282648	9.43376e-06	0.282645	-4.84231	0.303287	0.333778
Yang et al., 2018	Pulang pluton	99.9926	28.046	13SBB3 6	219	0.0225529	0.000882445	0.282724	6.74367e-06	0.28272	-2.16667	2.57483	0.238589
Yang et al., 2018	Pulang pluton	99.9926	28.046	13SBB3 7	226	0.0261109	0.000940393	0.282695	8.81876e-06	0.282691	-3.16939	1.71489	0.312011
Yang et al., 2018	Xuejiping pluton	99.8354	27.9849	XJP-B7 1	220	0.0271761	0.00105946	0.282696	8.7589e-06	0.282691	-3.15396	1.58298	0.309889
Yang et al., 2018	Xuejiping pluton	99.8354	27.9849	XJP-B7 2	210	0.0404371	0.00148503	0.282708	9.13534e-06	0.282702	-2.73087	1.73129	0.3232
Yang et al., 2018	Xuejiping pluton	99.8354	27.9849	XJP-B7 3	228	0.0261829	0.00101939	0.282682	9.60794e-06	0.282677	-3.64963	1.26582	0.339934
Yang et al., 2018	Xuejiping pluton	99.8354	27.9849	XJP-B7 4	218	0.0290282	0.0011008	0.282693	8.13571e-06	0.282688	-3.26606	1.42169	0.287839
Yang et al., 2018	Xuejiping pluton	99.8354	27.9849	XJP-B7 5	224	0.0265193	0.00103629	0.282702	7.46336e-06	0.282698	-2.92326	1.90359	0.264055
Yang et al., 2018	Xuejiping pluton	99.8354	27.9849	XJP-B7 6	222	0.0269518	0.00103912	0.282702	8.65498e-06	0.282698	-2.92234	1.86088	0.306213
Yang et al., 2018	Xuejiping pluton	99.8354	27.9849	XJP-B7 7	240	0.0282503	0.00108162	0.282694	9.66581e-06	0.282689	-3.22706	1.93816	0.34199
Yang et al., 2018	Xuejiping pluton	99.8354	27.9849	XJP-B7 8	238	0.0302361	0.00118077	0.282697	1.04702e-05	0.282692	-3.12003	1.98645	0.370449
Yang et al., 2018	Xuejiping pluton	99.8354	27.9849	XJP-B7 10	245	0.03056	0.00119348	0.282688	8.43599e-06	0.282683	-3.41859	1.83629	0.298481
Yang et al., 2018	Xuejiping pluton	99.8354	27.9849	XJP-B7 11	226	0.0302262	0.00119066	0.282671	7.70425e-06	0.282666	-4.03074	0.815667	0.272579
Yang et al., 2018	Xuejiping pluton	99.8354	27.9849	XJP-B7 12	225	0.0269005	0.00104366	0.282681	8.69204e-06	0.282677	-3.68085	1.16612	0.307526
Yang et al., 2018	Xuejiping pluton	99.8354	27.9849	XJP-B7 13	230	0.0198514	0.000787906	0.282668	7.83031e-06	0.282665	-4.14012	0.853554	0.277041
Yang et al., 2018	Xuejiping pluton	99.8354	27.9849	XJP-B7 14	227	0.0319064	0.00125239	0.282703	8.98064e-06	0.282697	-2.90904	1.95016	0.317739
Yang et al., 2018	Xuejiping pluton	99.8354	27.9849	XJP-B7 15	210	0.0281316	0.00110952	0.2827	8.37806e-06	0.282695	-3.01357	1.50064	0.296408
Yang et al., 2018	Xuejiping pluton	99.8354	27.9849	XJP-B7 16	214	0.0238777	0.00100604	0.282683	7.98139e-06	0.282679	-3.59425	1.02055	0.282377
Yang et al., 2018	Xuejiping pluton	99.8354	27.9849	XJP-B7 17	218	0.0274193	0.00109022	0.282675	9.04624e-06	0.28267	-3.8921	0.796881	0.320053
Yang et al., 2018	Xuejiping pluton	99.8354	27.9849	XJP-B7 18	218	0.0263499	0.00107257	0.282699	8.10154e-06	0.282695	-3.0256	1.66634	0.28663
Yang et al., 2018	Xuejiping pluton	99.8354	27.9849	XJP-B7 19	210	0.0272194	0.00110547	0.282696	9.07022e-06	0.282691	-3.15672	1.35799	0.320896
Yang et al., 2018	Xuejiping pluton	99.8354	27.9849	XJP-B7 20	213	0.0280397	0.0011447	0.282682	7.76945e-06	0.282678	-3.62731	0.946303	0.274878
Yang et al., 2018	Pulang pluton	99.9926	28.046	13BQMB8 1	216.2	0.0195404	0.000808288	0.282587	1.05065e-05	0.282583	-7.0183	-2.32929	0.371716
Yang et al., 2018	Pulang pluton	99.9926	28.046	13BQMB8 2	216.2	0.0180242	0.000763256	0.282667	9.07526e-06	0.282664	-4.15545	0.541377	0.321079
Yang et al., 2018	Pulang pluton	99.9926	28.046	13BQMB8 3	216.2	0.018975	0.000806721	0.282599	1.03634e-05	0.282596	-6.56085	-1.8714	0.366653
Yang et al., 2018	Pulang pluton	99.9926	28.046	13BQMB8 4	216.2	0.0169518	0.000707055	0.282618	9.98342e-06	0.282615	-5.91204	-1.20801	0.353209
Yang et al., 2018	Pulang pluton	99.9926	28.046	13BQMB8 5	216.2	0.0213307	0.000868318	0.282634	9.54416e-06	0.28263	-5.34758	-0.666357	0.337668
Yang et al., 2018	Pulang pluton	99.9926	28.046	13BQMB8 6	216.2	0.0205894	0.000842663	0.282529	9.59294e-06	0.282526	-9.03849	-4.35538	0.339394
Yang et al., 2018	Pulang pluton	99.9926	28.046	13BQMB8 7	216.2	0.0334939	0.00135712	0.2826	1.16069e-05	0.282594	-6.5477	-1.937	0.410647
Yang et al., 2018	Pulang pluton	99.9926	28.046	13BQMB8 8	216.2	0.0237066	0.000969512	0.282608	8.71879e-06	0.282605	-6.24306	-1.57675	0.308467
Yang et al., 2018	Pulang pluton	99.9926	28.046	13BQMB8 9	216.2	0.0172953	0.000711774	0.282617	8.39295e-06	0.282614	-5.93421	-1.23087	0.296939
Yang et al., 2018	Pulang pluton	99.9926	28.046	13BQMB8 10	216.2	0.0183341	0.000771812	0.282592	9.69534e-06	0.282588	-6.8384	-2.14409	0.343017
Yang et al., 2018	Pulang pluton	99.9926	28.046	13BQMB9 1	216.2	0.0212715	0.000862522	0.282582	7.90143e-06	0.282579	-7.1746	-2.49343	0.279549
Yang et al., 2018	Pulang pluton	99.9926	28.046	13BQMB9 2	216.2	0.0212867	0.000850347	0.282582	7.54611e-06	0.282578	-7.1918	-2.5089	0.266978
Yang et al., 2018	Pulang pluton	99.9926	28.046	13BQMB9 3	216.2	0.0204723	0.00084249	0.282668	9.80295e-06	0.282664	-4.14656	0.538937	0.346824
Yang et al., 2018	Pulang pluton	99.9926	28.046	13BQMB9 4	216.2	0.019339	0.000780581	0.28265	9.05345e-06	0.282647	-4.78069	-0.0866402	0.320307
Yang et al., 2018	Pulang pluton	99.9926	28.046	13BQMB9 5	216.2	0.0239008	0.000990576	0.282634	7.1648e-06	0.28263	-5.35668	-0.692963	0.253487
Yang et al., 2018	Pulang pluton	99.9926	28.046	13BQMB9 6	216.2	0.0282682	0.00116012	0.282637	8.87357e-06	0.282632	-5.2313	-0.591784	0.313943
Yang et al., 2018	Pulang pluton	99.9926	28.046	13BQMB9 7	216.2	0.0245916	0.0010132	0.282645	8.57876e-06	0.282641	-4.95085	-0.290168	0.303513
Yang et al., 2018	Pulang pluton	99.9926	28.046	13BQMB9 8	216.2	0.0227744	0.000963341	0.282643	7.17415e-06	0.282639	-5.01248	-0.344698	0.253818
Yang et al., 2018	Pulang pluton	99.9926	28.046	13BQMB9 9	216.2	0.0270956	0.00106888	0.282684	9.38114e-06	0.28268	-3.55452	1.09886	0.331901
Yang et al., 2018	Pulang pluton	99.9926	28.046	13BQMB9 10	216.2	0.0256166	0.00104723	0.28272	6.95437e-06	0.282716	-2.28384	2.37325	0.246042
Wang et al., 2018	Pulang pluton	99.9926	28.0533	PL60.1	216	0.03826	0.000991	0.282654	1.4e-05	0.28265	-4.63249	0.0271885	0.495314
Wang et al., 2018	Pulang pluton	99.9926	28.0533	PL60.2	214	0.029774	0.000841	0.282568	1.5e-05	0.282565	-7.67367	-3.03745	0.530691
Wang et al., 2018	Pulang pluton	99.9926	28.0533	PL60.3	215	0.044512	0.001186	0.282601	1.7e-05	0.282596	-6.50671	-1.8973	0.601451
Wang et al., 2018	Pulang pluton	99.9926	28.0533	PL60.4	215	0.038503	0.001059	0.282604	1.7e-05	0.2826	-6.40062	-1.77309	0.601451
Wang et al., 2018	Pulang pluton	99.9926	28.0533	PL60.5	214	0.041916	0.001145	0.282633	1.4e-05	0.282628	-5.37511	-0.780843	0.495311
Wang et al., 2018	Pulang pluton	99.9926	28.0533	PL60.6	216	0.028267	0.000773	0.282652	1.3e-05	0.282649	-4.70322	-0.0124045	0.459934
Wang et al., 2018	Pulang pluton	99.9926	28.0533	PL60.7	215	0.030428	0.000875	0.282626	1.4e-05	0.282622	-5.62265	-0.968556	0.495312
Wang et al., 2018	Pulang pluton	99.9926	28.0533	PL60.8	215	0.03609	0.001003	0.282512	1.3e-05	0.282508	-9.65398	-5.02003	0.459933
Wang et al., 2018	Pulang pluton	99.9926	28.0533	PL60.9	206	0.033404	0.000961	0.282602	1.6e-05	0.282598	-6.47135	-2.02466	0.56606
Wang et al., 2018	Pulang pluton	99.9926	28.0533	PL60.10	215	0.03477	0.001031	0.282589	1.3e-05	0.282585	-6.93106	-2.29979	0.459933
Wang et al., 2018	Pulang pluton	99.9926	28.0533	PL60.11	214	0.033624	0.000985	0.282596	1.5e-05	0.282592	-6.68352	-2.06722	0.530691
Wang et al., 2018	Pulang pluton	99.9926	28.0533	PL60.12	214	0.030595	0.000866	0.282609	1.3e-05	0.282606	-6.22381	-1.59043	0.459932
Wang et al., 2018	Pulang pluton	99.9926	28.0533	PL60.13	214	0.050386	0.001344	0.282576	1.4e-05	0.282571	-7.39077	-2.82565	0.495311
Wang et al., 2018	Pulang pluton	99.9926	28.0533	PL60.14	214	0.038925	0.00106	0.282636	1.6e-05	0.282632	-5.26902	-0.662665	0.56607
Wang et al., 2018	Pulang pluton	99.9926	28.0533	PL60.15	215	0.034989	0.000987	0.282616	1.4e-05	0.282612	-5.97627	-1.33829	0.495312
Wang et al., 2018	Pulang pluton	99.9926	28.0533	PL60.16	215	0.025278	0.000718	0.282644	1.5e-05	0.282641	-4.98612	-0.309384	0.530692
Wang et al., 2018	Pulang pluton	99.9926	28.0533	PL60.17	212	0.038758	0.001084	0.282613	1.5e-05	0.282609	-6.08236	-1.52291	0.530688
Wang et al., 2018	Pulang pluton	99.9926	28.0533	PL60.18	215	0.046155	0.001288	0.282628	1.6e-05	0.282623	-5.55192	-0.956567	0.566071
Wang et al., 2018	Pulang pluton	99.9926	28.0533	PL60.19	216	0.033918	0.000957	0.282583	1.6e-05	0.282579	-7.14324	-2.4799	0.566073
Wang et al., 2018	Pulang pluton	99.9926	28.0533	PL60.20	215	0.042123	0.001178	0.282606	1.3e-05	0.282601	-6.3299	-1.71926	0.459933
Wang et al., 2018	Pulang pluton	99.9926	28.0533	PL210.1	210	0.036524	0.00083	0.282684	2.4e-05	0.282681	-3.57162	0.981187	0.849098
Wang et al., 2018	Pulang pluton	99.9926	28.0533	PL210.2	209	0.038109	0.000836	0.282613	2e-05	0.28261	-6.08236	-1.55328	0.70758
Wang et al., 2018	Pulang pluton	99.9926	28.0533	PL210.3	208	0.043178	0.000993	0.282555	1.8e-05	0.282551	-8.13339	-3.6486	0.63682
Wang et al., 2018	Pulang pluton	99.9926	28.0533	PL210.4	212	0.052192	0.00117	0.28263	2.1e-05	0.282625	-5.4812	-0.93353	0.742964
Wang et al., 2018	Pulang pluton	99.9926	28.0533	PL210.5	207	0.043583	0.001016	0.282579	2.2e-05	0.282575	-7.28469	-2.82427	0.778334
Wang et al., 2018	Pulang pluton	99.9926	28.0533	PL210.6	207	0.049379	0.00132	0.282588	1.7e-05	0.282583	-6.96642	-2.5475	0.60144
Wang et al., 2018	Pulang pluton	99.9926	28.0533	PL210.7	208	0.034235	0.000998	0.28259	1.5e-05	0.282586	-6.8957	-2.41102	0.530684
Wang et al., 2018	Pulang pluton	99.9926	28.0533	PL210.8	214	0.039631	0.001114	0.282636	1.8e-05	0.282632	-5.26902	-0.670314	0.636829
Wang et al., 2018	Pulang pluton	99.9926	28.0533	PL210.9	212	0.032405	0.000967	0.282635	2e-05	0.282631	-5.30438	-0.728151	0.707585
Wang et al., 2018	Pulang pluton	99.9926	28.0533	PL210.10	212	0.041223	0.001213	0.282621	1.7e-05	0.282616	-5.79946	-1.25798	0.601447
Wang et al., 2018	Pulang pluton	99.9926	28.0533	PL210.11	209	0.029107	0.000767	0.282633	2e-05	0.28263	-5.37511	-0.83616	0.70758
Wang et al., 2018	Pulang pluton	99.9926	28.0533	PL210.12	213	0.036435	0.000956	0.282657	2e-05	0.282653	-4.52641	0.0733832	0.707586
Wang et al., 2018	Pulang pluton	99.9926	28.0533	PL210.13	216	0.053325	0.001328	0.282588	2e-05	0.282583	-6.96642	-2.35604	0.707591
Wang et al., 2018	Pulang pluton	99.9926	28.0533	PL210.14	214	0.038725	0.000981	0.282593	2.3e-05	0.282589	-6.78961	-2.17279	0.813726
Wang et al., 2018	Pulang pluton	99.9926	28.0533	PL210.15	214	0.048072	0.00116	0.282642	2.3e-05	0.282637	-5.05685	-0.464553	0.813726
Wang et al., 2018	Pulang pluton	99.9926	28.0533	PL210.16	215	0.036389	0.00083	0.282628	2.4e-05	0.282625	-5.55192	-0.891393	0.849107
Wang et al., 2018	Pulang pluton	99.9926	28.0533	PL210.17	216	0.043936	0.000984	0.282594	2e-05	0.28259	-6.75425	-2.09458	0.707591
Wang et al., 2018	Pulang pluton	99.9926	28.0533	PL210.18	215	0.047354	0.001059	0.28259	2.3e-05	0.282586	-6.8957	-2.2684	0.813728
Wang et al., 2018	Pulang pluton	99.9926	28.0533	PL210.19	228	0.05063	0.001142	0.282602	2.2e-05	0.282597	-6.47135	-1.57583	0.778371
Wang et al., 2018	Pulang pluton	99.9926	28.0533	PL210.20	216	0.04693	0.001064	0.282595	2.4e-05	0.282591	-6.71889	-2.07064	0.849109
Wang et al., 2019	Xiuwacu pluton	99.9801	28.4493	XS12-17 01	220	0.062624	0.002047	0.282757	2.8e-05	0.282749	-0.990152	3.60405	0.990636
Wang et al., 2019	Xiuwacu pluton	99.9801	28.4493	XS12-17 02	219.5	0.07966	0.002529	0.282721	3e-05	0.282711	-2.2632	2.24988	1.06139
Wang et al., 2019	Xiuwacu pluton	99.9801	28.4493	XS12-17 03	219.6	0.100327	0.003147	0.282702	3e-05	0.282689	-2.93509	1.4899	1.06139
Wang et al., 2019	Xiuwacu pluton	99.9801	28.4493	XS12-17 04	220	0.094258	0.002936	0.282703	3.4e-05	0.282691	-2.89973	1.56408	1.20292
Wang et al., 2019	Xiuwacu pluton	99.9801	28.4493	XS12-17 05	223.6	0.046011	0.001469	0.282699	3e-05	0.282693	-3.04118	1.71292	1.0614
Wang et al., 2019	Xiuwacu pluton	99.9801	28.4493	XS12-17 06	232.6	0.117236	0.003576	0.282703	3e-05	0.282687	-2.89973	1.72188	1.06143
Wang et al., 2019	Xiuwacu pluton	99.9801	28.4493	XS12-17 07	216.8	0.076082	0.002333	0.282728	3.2e-05	0.282719	-2.01567	2.47001	1.13215
Wang et al., 2019	Xiuwacu pluton	99.9801	28.4493	XS12-17 08	216.8	0.071584	0.00232	0.282684	3.6e-05	0.282675	-3.57162	0.915174	1.27367
Wang et al., 2019	Xiuwacu pluton	99.9801	28.4493	XS12-17 09	227.8	0.058288	0.001875	0.282709	2.8e-05	0.282701	-2.68755	2.09504	0.990653
Wang et al., 2019	Xiuwacu pluton	99.9801	28.4493	XS12-17 10	220	0.04613	0.001385	0.282712	3.2e-05	0.282706	-2.58147	2.10836	1.13216
Wang et al., 2019	Xiuwacu pluton	99.9801	28.4493	XS12-17 11	215.2	0.055724	0.001681	0.28271	3e-05	0.282703	-2.65219	1.89286	1.06138
Wang et al., 2019	Xiuwacu pluton	99.9801	28.4493	XS12-17 12	220	0.081381	0.002408	0.282738	3.6e-05	0.282728	-1.66204	2.87927	1.27367
Wang et al., 2019	Xiuwacu pluton	99.9801	28.4493	XS12-17 13	220	0.051927	0.001502	0.282712	3e-05	0.282706	-2.58147	2.09132	1.0614
Wang et al., 2019	Xiuwacu pluton	99.9801	28.4493	XS12-17 14	220	0.030645	0.00098	0.282708	2.6e-05	0.282704	-2.72292	2.02581	0.919876
Wang et al., 2019	Xiuwacu pluton	99.9801	28.4493	XS12-17 15	220	0.044231	0.001312	0.282714	4.6e-05	0.282709	-2.51074	2.18975	1.62747
Wang et al., 2019	Xiuwacu pluton	99.9801	28.4493	XS12-07 01	224.8	0.051942	0.001819	0.282684	2.8e-05	0.282676	-3.57162	1.15572	0.990647
Wang et al., 2019	Xiuwacu pluton	99.9801	28.4493	XS12-07 02	215.9	0.04364	0.001495	0.282664	2.4e-05	0.282658	-4.27887	0.306801	0.849109
Wang et al., 2019	Xiuwacu pluton	99.9801	28.4493	XS12-07 03	212.9	0.036685	0.001256	0.282669	2.2e-05	0.282664	-4.10206	0.453498	0.778345
Wang et al., 2019	Xiuwacu pluton	99.9801	28.4493	XS12-07 04	218.5	0.037804	0.001284	0.282654	2.4e-05	0.282649	-4.63249	0.0388819	0.849114
Wang et al., 2019	Xiuwacu pluton	99.9801	28.4493	XS12-07 05	217.4	0.04338	0.001435	0.282665	2.6e-05	0.282659	-4.24351	0.382754	0.919871
Wang et al., 2019	Xiuwacu pluton	99.9801	28.4493	XS12-07 06	218.1	0.028568	0.000972	0.282638	3e-05	0.282634	-5.1983	-0.490727	1.06139
Wang et al., 2019	Xiuwacu pluton	99.9801	28.4493	XS12-07 07	214.1	0.041451	0.001391	0.282668	2.6e-05	0.282662	-4.13742	0.424729	0.919864
Wang et al., 2019	Xiuwacu pluton	99.9801	28.4493	XS12-07 08	218.6	0.03349	0.001185	0.282664	2.4e-05	0.282659	-4.27887	0.409147	0.849114
Wang et al., 2019	Xiuwacu pluton	99.9801	28.4493	XS12-07 09	218.5	0.032165	0.001057	0.28269	2.4e-05	0.282686	-3.35944	1.34538	0.849114
Wang et al., 2019	Xiuwacu pluton	99.9801	28.4493	XS12-07 10	221.6	0.039646	0.001199	0.282695	2.8e-05	0.28269	-3.18263	1.56837	0.99064
Wang et al., 2019	Xiuwacu pluton	99.9801	28.4493	XS12-07 11	220.8	0.043517	0.001383	0.282667	2.6e-05	0.282661	-4.17278	0.53365	0.919878
Wang et al., 2019	Xiuwacu pluton	99.9801	28.4493	XS12-07 12	217.4	0.044568	0.001447	0.28269	2.6e-05	0.282684	-3.35944	1.26552	0.919871
Wang et al., 2019	Xiuwacu pluton	99.9801	28.4493	XS12-07 13	216.1	0.042749	0.00134	0.282693	2.2e-05	0.282688	-3.25336	1.35924	0.77835
Wang et al., 2019	Xiuwacu pluton	99.9801	28.4493	XS12-07 14	216.4	0.033511	0.001066	0.282681	2.2e-05	0.282677	-3.67771	0.980345	0.778351
Wang et al., 2019	Xiuwacu pluton	99.9801	28.4493	XS12-07 15	217.4	0.044479	0.001398	0.282671	2.6e-05	0.282665	-4.03133	0.600356	0.919871
Wang et al., 2019	Xiuwacu pluton	99.9801	28.4493	XWC11-42 01	215	0.030598	0.001015	0.282738	4.2e-05	0.282734	-1.66204	2.97402	1.48594
Wang et al., 2019	Xiuwacu pluton	99.9801	28.4493	XWC11-42 02	213.7	0.040332	0.00143	0.282747	3.6e-05	0.282741	-1.34378	3.20564	1.27366
Wang et al., 2019	Xiuwacu pluton	99.9801	28.4493	XWC11-42 03	216.4	0.040206	0.001338	0.282733	3.2e-05	0.282728	-1.83885	2.78112	1.13215
Wang et al., 2019	Xiuwacu pluton	99.9801	28.4493	XWC11-42 04	215	0.063652	0.001876	0.282695	4e-05	0.282687	-3.18263	1.33018	1.41518
Wang et al., 2019	Xiuwacu pluton	99.9801	28.4493	XWC11-42 05	215	0.049223	0.001555	0.282714	3.4e-05	0.282708	-2.51074	2.04807	1.2029
Wang et al., 2019	Xiuwacu pluton	99.9801	28.4493	XWC11-42 06	212.5	0.033869	0.001074	0.282775	5e-05	0.282771	-0.353626	4.22072	1.76896
Wang et al., 2019	Xiuwacu pluton	99.9801	28.4493	XWC11-42 07	215.3	0.053189	0.001876	0.282797	4e-05	0.282789	0.424351	4.9452	1.41518
Wang et al., 2019	Xiuwacu pluton	99.9801	28.4493	XWC11-42 08	210.8	0.057785	0.001856	0.282721	4e-05	0.282714	-2.2632	2.16446	1.41517
Wang et al., 2019	Xiuwacu pluton	99.9801	28.4493	XWC11-42 09	211.9	0.066704	0.001941	0.282725	3.8e-05	0.282717	-2.12175	2.31722	1.34441
Wang et al., 2019	Xiuwacu pluton	99.9801	28.4493	XWC11-42 10	218.7	0.047617	0.0016	0.282654	3e-05	0.282647	-4.63249	-0.00257414	1.06139
Wang et al., 2019	Xiuwacu pluton	99.9801	28.4493	XWC11-42 11	213.7	0.031076	0.001342	0.282698	4.4e-05	0.282693	-3.07654	1.4845	1.55669
Wang et al., 2019	Xiuwacu pluton	99.9801	28.4493	XWC11-42 12	791.7	0.035078	0.001186	0.282092	4e-05	0.282074	-24.5063	-7.45095	1.41701
Wang et al., 2019	Xiuwacu pluton	99.9801	28.4493	XWC11-42 13	424.5	0.016488	0.000589	0.282373	3.6e-05	0.282368	-14.5694	-5.28585	1.27426
Wang et al., 2019	Xiuwacu pluton	99.9801	28.4493	XWC11-42 14	1214.4	0.010126	0.000336	0.281881	3e-05	0.281873	-31.9677	-5.00668	1.06378
Wang et al., 2019	Xiuwacu pluton	99.9801	28.4493	XWC11-42 15	429.2	0.016791	0.000607	0.282411	3.2e-05	0.282406	-13.2256	-3.84262	1.13268
Wang et al., 2019	Xiuwacu pluton	99.9801	28.4493	XWC11-42 16	415.1	0.020427	0.000686	0.282385	3.6e-05	0.28238	-14.145	-5.09438	1.27423
Wang et al., 2019	Xiuwacu pluton	99.9801	28.4493	XWC11-42 17	975	0.02382	0.000998	0.282276	4.4e-05	0.282258	-17.9995	3.18593	1.55936
Wang et al., 2019	Xiuwacu pluton	99.9801	28.4493	XWC11-42 18	1266.4	0.026253	0.000908	0.282083	3.6e-05	0.282061	-24.8245	2.84309	1.27668
Wang et al., 2019	Xiuwacu pluton	99.9801	28.4493	XWC11-42 19	454.9	0.01422	0.000617	0.28261	4.6e-05	0.282605	-6.18845	3.76345	1.62833
Wang et al., 2019	Hongshan	99.8842	28.1363	HS11-114 01	216	0.047032	0.001415	0.282708	3.4e-05	0.282702	-2.72292	1.87707	1.2029
Wang et al., 2019	Hongshan	99.8842	28.1363	HS11-114 02	216	0.014103	0.000472	0.282695	2.8e-05	0.282693	-3.18263	1.55195	0.990627
Wang et al., 2019	Hongshan	99.8842	28.1363	HS11-114 03	216	0.055695	0.001783	0.282701	3e-05	0.282694	-2.97045	1.5768	1.06139
Wang et al., 2019	Hongshan	99.8842	28.1363	HS11-114 04	216	0.027714	0.000896	0.282693	3.4e-05	0.282689	-3.25336	1.42057	1.2029
Wang et al., 2019	Hongshan	99.8842	28.1363	HS11-114 05	216	0.045369	0.001408	0.282754	3e-05	0.282748	-1.09624	3.50553	1.06139
Wang et al., 2019	Hongshan	99.8842	28.1363	HS11-114 06	216	0.069799	0.002183	0.282713	3.2e-05	0.282704	-2.5461	1.94417	1.13215
Wang et al., 2019	Hongshan	99.8842	28.1363	HS11-114 07	216	0.042908	0.001354	0.282747	3.2e-05	0.282742	-1.34378	3.26559	1.13215
Wang et al., 2019	Hongshan	99.8842	28.1363	HS11-114 08	216	0.034154	0.001121	0.282719	3e-05	0.282714	-2.33393	2.30827	1.06139
Wang et al., 2019	Hongshan	99.8842	28.1363	HS11-114 09	216	0.048945	0.001437	0.282721	3.2e-05	0.282715	-2.2632	2.33386	1.13215
Wang et al., 2019	Hongshan	99.8842	28.1363	HS11-114 10	216	0.020079	0.000648	0.282724	3.2e-05	0.282721	-2.15712	2.55279	1.13215
Wang et al., 2019	Hongshan	99.8842	28.1363	HS11-114 11	216	0.046396	0.001428	0.282686	3e-05	0.28268	-3.50089	1.09686	1.06139
Wang et al., 2019	Hongshan	99.8842	28.1363	HS11-114 12	216	0.032713	0.001057	0.28269	3.6e-05	0.282686	-3.35944	1.29142	1.27366
Wang et al., 2019	Hongshan	99.8842	28.1363	HS11-114 13	216	0.026019	0.000846	0.282677	3.4e-05	0.282674	-3.81916	0.861648	1.2029
Wang et al., 2019	Hongshan	99.8842	28.1363	HS11-114 14	216	0.041083	0.00118	0.282712	3.2e-05	0.282707	-2.58147	2.05218	1.13215
Wang et al., 2019	Hongshan	99.8842	28.1363	HS11-114 15	216	0.035085	0.001068	0.282661	3e-05	0.282657	-4.38496	0.263837	1.06139
Cao et al., 2009	Xuejiping	99.8333	27.84	XJ1 1	213.4	0.038137	0.001312	0.282687	2.8e-05	0.282682	-3.46553	1.09314	0.990621
Cao et al., 2009	Xuejiping	99.8333	27.84	XJ1 2	220.4	0.014144	0.000586	0.282698	2.2e-05	0.282696	-3.07654	1.73815	0.778358
Cao et al., 2009	Xuejiping	99.8333	27.84	XJ1 3	215.6	0.015096	0.000672	0.282678	2.5e-05	0.282675	-3.78379	0.913167	0.884488
Cao et al., 2009	Xuejiping	99.8333	27.84	XJ1 4	212.4	0.015136	0.000635	0.282702	2e-05	0.282699	-2.93509	1.69759	0.707585
Cao et al., 2009	Xuejiping	99.8333	27.84	XJ1 5	218.2	0.020151	0.000848	0.282686	2.4e-05	0.282683	-3.50089	1.22757	0.849113
Cao et al., 2009	Xuejiping	99.8333	27.84	XJ1 6	210.7	0.023425	0.001006	0.282687	8.9e-05	0.282683	-3.46553	1.07799	3.14874
Cao et al., 2009	Xuejiping	99.8333	27.84	XJ1 7	214.6	0.017044	0.000735	0.282744	2.8e-05	0.282741	-1.44986	3.21742	0.990624
Cao et al., 2009	Xuejiping	99.8333	27.84	XJ1 8	213.6	0.019858	0.000829	0.282852	5.6e-05	0.282849	2.36929	7.0033	1.98124
Cao et al., 2009	Xuejiping	99.8333	27.84	XJ1 9	211.7	0.023714	0.001069	0.282677	8.4e-05	0.282673	-3.81916	0.736992	2.97185
Cao et al., 2009	Xuejiping	99.8333	27.84	XJ1 10	212.8	0.019133	0.000822	0.282684	2.5e-05	0.282681	-3.57162	1.04317	0.884482
Cao et al., 2009	Xuejiping	99.8333	27.84	XJ1 11	217.1	0.015597	0.000614	0.28281	2.6e-05	0.282808	0.884064	5.62437	0.91987
Cao et al., 2009	Xuejiping	99.8333	27.84	XJ1 12	218.9	0.016244	0.000725	0.282683	2.5e-05	0.28268	-3.60698	1.15446	0.884494
Gao et al., 2018	Xiuwacu	99.9908	28.5156	Sample1 1	211.204	0.0382306	0.00135533	0.282815	No data	0.28281	1.07214	5.57986	n.g.
Gao et al., 2018	Xiuwacu	99.9908	28.5156	Sample1 2	213.887	0.0478551	0.00187453	0.282724	No data	0.282716	-2.15769	2.3324	n.g.
Gao et al., 2018	Xiuwacu	99.9908	28.5156	Sample1 3	214.246	0.0470052	0.00167859	0.282707	No data	0.2827	-2.76215	1.763	n.g.
Gao et al., 2018	Xiuwacu	99.9908	28.5156	Sample1 4	215.659	0.0457943	0.00167044	0.282722	No data	0.282715	-2.23299	2.32349	n.g.
Gao et al., 2018	Xiuwacu	99.9908	28.5156	Sample1 5	213.43	0.0822626	0.0030231	0.282702	No data	0.28269	-2.93331	1.38455	n.g.
Gao et al., 2018	Xiuwacu	99.9908	28.5156	Sample1 6	225.915	0.0707999	0.00219735	0.282665	No data	0.282655	-4.25677	0.437156	n.g.
Gao et al., 2018	Xiuwacu	99.9908	28.5156	Sample1 7	215.996	0.0493493	0.00149353	0.282771	No data	0.282765	-0.501614	4.08813	n.g.
Gao et al., 2018	Xiuwacu	99.9908	28.5156	Sample1 10	215.192	0.0554587	0.0017528	0.282697	No data	0.28269	-3.1035	1.43093	n.g.
Gao et al., 2018	Xiuwacu	99.9908	28.5156	Sample1 11	215.373	0.059671	0.00172221	0.28275	No data	0.282743	-1.22466	3.31887	n.g.
Gao et al., 2018	Xiuwacu	99.9908	28.5156	Sample1 12	210.434	0.0484695	0.00155721	0.282833	No data	0.282827	1.7109	6.17432	n.g.
Gao et al., 2018	Xiuwacu	99.9908	28.5156	Sample1 13	211.559	0.100491	0.00277807	0.282805	No data	0.282794	0.724398	5.04035	n.g.
Gao et al., 2018	Xiuwacu	99.9908	28.5156	Sample1 14	211.041	0.0185835	0.000615893	0.282725	No data	0.282722	-2.1342	2.4718	n.g.
Gao et al., 2018	Xiuwacu	99.9908	28.5156	Sample1 15	210.334	0.0738136	0.00194686	0.282702	No data	0.282694	-2.93064	1.47425	n.g.
Gao et al., 2018	Hongshan	99.8972	28.1217	Sample2 1	210	0.061163	0.002099	0.282817	No data	0.282809	1.1316	5.51023	n.g.
Gao et al., 2018	Hongshan	99.8972	28.1217	Sample2 2	210	0.037525	0.001207	0.282768	No data	0.282763	-0.601163	3.90063	n.g.
Gao et al., 2018	Hongshan	99.8972	28.1217	Sample2 3	210	0.045695	0.001592	0.282754	No data	0.282748	-1.09624	3.35182	n.g.
Gao et al., 2018	Hongshan	99.8972	28.1217	Sample2 4	210	0.040107	0.001431	0.282748	No data	0.282742	-1.30841	3.16192	n.g.
Gao et al., 2018	Hongshan	99.8972	28.1217	Sample2 5	210	0.036432	0.001185	0.282739	No data	0.282734	-1.62668	2.8777	n.g.
Gao et al., 2018	Hongshan	99.8972	28.1217	Sample2 6	210	0.038142	0.00135	0.282773	No data	0.282768	-0.424351	4.05765	n.g.
Gao et al., 2018	Hongshan	99.8972	28.1217	Sample2 7	210	0.054462	0.001699	0.282792	No data	0.282785	0.247538	4.68135	n.g.
Gao et al., 2018	Hongshan	99.8972	28.1217	Sample2 8	210	0.038466	0.00124	0.28276	No data	0.282755	-0.884064	3.61301	n.g.
Liu et al., 2013	Pulang pluton	99.9903	28.0403	Pl28 1	219	0.020604	0.000677	0.282628	No data	0.282625	-5.55192	-0.782288	n.g.
Liu et al., 2013	Pulang pluton	99.9903	28.0403	Pl28 2	215	0.018519	0.000621	0.282591	No data	0.282589	-6.86034	-2.17069	n.g.
Liu et al., 2013	Pulang pluton	99.9903	28.0403	Pl28 3	216	0.024691	0.000787	0.282611	No data	0.282608	-6.15308	-1.46497	n.g.
Liu et al., 2013	Pulang pluton	99.9903	28.0403	Pl28 4	221	0.026447	0.000803	0.282621	No data	0.282618	-5.79946	-1.00471	n.g.
Liu et al., 2013	Pulang pluton	99.9903	28.0403	Pl28 5	229	0.024848	0.000783	0.282608	No data	0.282605	-6.25917	-1.2876	n.g.
Liu et al., 2013	Pulang pluton	99.9903	28.0403	Pl28 6	225	0.021835	0.000667	0.282618	No data	0.282615	-5.90555	-1.00359	n.g.
Liu et al., 2013	Pulang pluton	99.9903	28.0403	Pl28 7	220	0.023746	0.000745	0.282619	No data	0.282616	-5.87018	-1.08877	n.g.
Liu et al., 2013	Pulang pluton	99.9903	28.0403	Pl28 8	221	0.024046	0.000748	0.282586	No data	0.282583	-7.03715	-2.23496	n.g.
Liu et al., 2013	Pulang pluton	99.9903	28.0403	Pl28 9	213	0.019646	0.000621	0.282587	No data	0.282585	-7.00179	-2.35594	n.g.
Liu et al., 2013	Pulang pluton	99.9903	28.0403	Pl28 10	228	0.019988	0.000601	0.282595	No data	0.282592	-6.71889	-1.74184	n.g.
Liu et al., 2013	Pulang pluton	99.9903	28.0403	Pl28 11	218	0.014264	0.000478	0.282544	No data	0.282542	-8.52238	-3.7473	n.g.
Liu et al., 2013	Pulang pluton	99.9903	28.0403	Pl28 12	214	0.042941	0.001244	0.28264	No data	0.282635	-5.12757	-0.547209	n.g.
Liu et al., 2013	Pulang pluton	99.9903	28.0403	Pl28 13	220	0.018485	0.000615	0.282538	No data	0.282535	-8.73455	-3.93561	n.g.
Liu et al., 2013	Pulang pluton	99.9903	28.0403	Pl28 14	225	0.03406	0.001037	0.282607	No data	0.282603	-6.29453	-1.44788	n.g.
Liu et al., 2013	Pulang pluton	99.9875	28.0378	PL31 1	219	0.018757	0.000597	0.282631	No data	0.282629	-5.44583	-0.664553	n.g.
Liu et al., 2013	Pulang pluton	99.9875	28.0378	PL31 2	216	0.021469	0.000692	0.282615	No data	0.282612	-6.01163	-1.30987	n.g.
Liu et al., 2013	Pulang pluton	99.9875	28.0378	PL31 3	217	0.047078	0.001415	0.282649	No data	0.282643	-4.80931	-0.188981	n.g.
Liu et al., 2013	Pulang pluton	99.9875	28.0378	PL31 4	212	0.032699	0.001059	0.282648	No data	0.282644	-4.84467	-0.28113	n.g.
Liu et al., 2013	Pulang pluton	99.9875	28.0378	PL31 5	218	0.023266	0.0007	0.282638	No data	0.282635	-5.1983	-0.453644	n.g.
Liu et al., 2013	Pulang pluton	99.9875	28.0378	PL31 6	211	0.026616	0.000809	0.282628	No data	0.282625	-5.55192	-0.97538	n.g.
Liu et al., 2013	Pulang pluton	99.9875	28.0378	PL31 7	217	0.024863	0.000757	0.282605	No data	0.282602	-6.36526	-1.65118	n.g.
Liu et al., 2013	Pulang pluton	99.9875	28.0378	PL31 8	211	0.03273	0.000989	0.282635	No data	0.282631	-5.30438	-0.752862	n.g.
Liu et al., 2013	Pulang pluton	99.9875	28.0378	PL31 9	214	0.028869	0.000886	0.282631	No data	0.282627	-5.44583	-0.814917	n.g.
Liu et al., 2013	Pulang pluton	99.9875	28.0378	PL31 10	217	0.020303	0.000599	0.282602	No data	0.2826	-6.47135	-1.73462	n.g.
Liu et al., 2013	Pulang pluton	99.9875	28.0378	PL31 11	219	0.033311	0.000982	0.282651	No data	0.282647	-4.73858	-0.0127644	n.g.
Liu et al., 2013	Pulang pluton	99.9875	28.0378	PL31 12	213	0.027815	0.000855	0.282626	No data	0.282623	-5.62265	-1.00914	n.g.
Liu et al., 2013	Pulang pluton	99.9875	28.0378	PL31 13	215	0.029162	0.000879	0.282627	No data	0.282623	-5.58728	-0.933746	n.g.
Liu et al., 2013	Pulang pluton	99.9875	28.0378	PL31 14	214	0.040323	0.00121	0.28265	No data	0.282645	-4.77394	-0.1886	n.g.
Liu et al., 2013	Pulang pluton	99.9875	28.0378	PLB9-1 1	218	0.031395	0.000979	0.282684	No data	0.28268	-3.57162	1.13356	n.g.
Liu et al., 2013	Pulang pluton	99.9875	28.0378	PLB9-1 2	214	0.033311	0.001064	0.282692	No data	0.282688	-3.28872	1.31801	n.g.
Liu et al., 2013	Pulang pluton	99.9875	28.0378	PLB9-1 3	216	0.022028	0.000695	0.28264	No data	0.282637	-5.12757	-0.425808	n.g.
Liu et al., 2013	Pulang pluton	99.9875	28.0378	PLB9-1 4	219	0.04361	0.001322	0.282617	No data	0.282612	-5.94091	-1.26496	n.g.
Liu et al., 2013	Pulang pluton	99.9875	28.0378	PLB9-1 5	214	0.019729	0.000613	0.282612	No data	0.28261	-6.11772	-1.44846	n.g.
Liu et al., 2013	Pulang pluton	99.9875	28.0378	PLB9-1 6	226	0.026993	0.0008	0.282606	No data	0.282603	-6.3299	-1.4262	n.g.
Liu et al., 2013	Pulang pluton	99.9875	28.0378	PLB9-1 7	221	0.02757	0.000803	0.282635	No data	0.282632	-5.30438	-0.50939	n.g.
Liu et al., 2013	Pulang pluton	99.9875	28.0378	PLB9-1 8	218	0.023842	0.000765	0.28262	No data	0.282617	-5.83482	-1.09986	n.g.
Liu et al., 2013	Pulang pluton	99.9875	28.0378	PLB9-1 9	229	0.019533	0.0006	0.282593	No data	0.28259	-6.78961	-1.79057	n.g.
Liu et al., 2013	Pulang pluton	99.9875	28.0378	PLB9-1 10	225	0.022745	0.000674	0.282599	No data	0.282596	-6.57744	-1.67685	n.g.
Liu et al., 2013	Pulang pluton	99.9875	28.0378	PLB9-1 11	222	0.024858	0.00072	0.282617	No data	0.282614	-5.94091	-1.11228	n.g.
Liu et al., 2013	Pulang pluton	99.9875	28.0378	PLB9-1 12	215	0.037527	0.001044	0.282667	No data	0.282663	-4.17278	0.457953	n.g.
Liu et al., 2013	Pulang pluton	99.9875	28.0378	PLB9-1 13	217	0.033786	0.001029	0.282594	No data	0.28259	-6.75425	-2.07942	n.g.
Liu et al., 2013	Pulang pluton	99.9875	28.0378	PLB9-1 14	224	0.035373	0.00106	0.282625	No data	0.282621	-5.65801	-0.836039	n.g.
Liu et al., 2013	Pulang pluton	99.9875	28.0378	PL42 1	218	0.022624	0.000744	0.28261	No data	0.282607	-6.18845	-1.45062	n.g.
Liu et al., 2013	Pulang pluton	99.9875	28.0378	PL42 2	223	0.030689	0.001002	0.282626	No data	0.282622	-5.62265	-0.81368	n.g.
Liu et al., 2013	Pulang pluton	99.9875	28.0378	PL42 3	212	0.025969	0.000818	0.282611	No data	0.282608	-6.15308	-1.55635	n.g.
Liu et al., 2013	Pulang pluton	99.9875	28.0378	PL42 4	217	0.024627	0.000821	0.282612	No data	0.282609	-6.11772	-1.41271	n.g.
Liu et al., 2013	Pulang pluton	99.9875	28.0378	PL42 5	211	0.030839	0.000974	0.282652	No data	0.282648	-4.70322	-0.149322	n.g.
Liu et al., 2013	Pulang pluton	99.9875	28.0378	PL42 6	213	0.024762	0.000756	0.282648	No data	0.282645	-4.84467	-0.216836	n.g.
Liu et al., 2013	Pulang pluton	99.9875	28.0378	PL42 7	229	0.029855	0.000932	0.282657	No data	0.282653	-4.52641	0.423461	n.g.
Liu et al., 2013	Pulang pluton	99.9875	28.0378	PL42 8	210	0.027335	0.000843	0.28264	No data	0.282637	-5.12757	-0.577299	n.g.
Liu et al., 2013	Pulang pluton	99.9875	28.0378	PL42 9	211	0.030205	0.000921	0.282604	No data	0.2826	-6.40062	-1.84012	n.g.
Liu et al., 2013	Pulang pluton	99.9875	28.0378	PL42 10	211	0.032291	0.001034	0.282645	No data	0.282641	-4.95076	-0.405355	n.g.
Liu et al., 2013	Pulang pluton	99.9875	28.0378	PL42 11	214	0.016504	0.000526	0.282624	No data	0.282622	-5.69337	-1.01158	n.g.
Liu et al., 2013	Pulang pluton	99.9875	28.0378	PL42 12	217	0.027092	0.000889	0.282633	No data	0.282629	-5.37511	-0.679507	n.g.
Liu et al., 2013	Pulang pluton	99.9875	28.0378	PL42 13	219	0.02349	0.000741	0.282602	No data	0.282599	-6.47135	-1.71144	n.g.
Liu et al., 2013	Pulang pluton	99.9875	28.0378	PL42 14	216	0.025939	0.000801	0.282597	No data	0.282594	-6.64816	-1.96228	n.g.
Liu et al., 2013	Pulang pluton	99.9875	28.0378	PLB3 1	220	0.018715	0.000615	0.282615	No data	0.282612	-6.01163	-1.21136	n.g.
Liu et al., 2013	Pulang pluton	99.9875	28.0378	PLB3 2	225	0.024608	0.000792	0.282623	No data	0.28262	-5.72873	-0.845302	n.g.
Liu et al., 2013	Pulang pluton	99.9875	28.0378	PLB3 3	214	0.028943	0.00097	0.282598	No data	0.282594	-6.6128	-1.99433	n.g.
Liu et al., 2013	Pulang pluton	99.9875	28.0378	PLB3 4	211	0.019113	0.000611	0.28259	No data	0.282588	-6.8957	-2.29214	n.g.
Liu et al., 2013	Pulang pluton	99.9875	28.0378	PLB3 5	216	0.017084	0.000591	0.282584	No data	0.282582	-7.10787	-2.39219	n.g.
Liu et al., 2013	Pulang pluton	99.9875	28.0378	PLB3 6	213	0.021674	0.000686	0.282598	No data	0.282595	-6.6128	-1.97593	n.g.
Liu et al., 2013	Pulang pluton	99.9875	28.0378	PLB3 7	235	0.02772	0.000883	0.2826	No data	0.282596	-6.54207	-1.45559	n.g.
Liu et al., 2013	Pulang pluton	99.9875	28.0378	PLB3 8	217	0.029675	0.000903	0.282639	No data	0.282635	-5.16293	-0.46924	n.g.
Liu et al., 2013	Pulang pluton	99.9875	28.0378	PLB3 9	216	0.035951	0.001129	0.28241	No data	0.282405	-13.261	-8.62515	n.g.
Liu et al., 2013	Pulang pluton	99.9875	28.0378	PLB3 10	220	0.026931	0.00084	0.282615	No data	0.282612	-6.01163	-1.24413	n.g.
Liu et al., 2013	Pulang pluton	99.9875	28.0378	PLB3 11	223	0.022958	0.000704	0.282604	No data	0.282601	-6.40062	-1.54805	n.g.
Liu et al., 2013	Pulang pluton	99.9875	28.0378	PLB3 12	215	0.036062	0.00109	0.282616	No data	0.282612	-5.97627	-1.35295	n.g.
Liu et al., 2013	Pulang pluton	99.9875	28.0378	PLB3 13	214	0.021742	0.000646	0.282645	No data	0.282642	-4.95076	-0.285613	n.g.
Liu et al., 2013	Pulang pluton	99.9875	28.0378	PLB3 14	222	0.018056	0.000545	0.282633	No data	0.282631	-5.37511	-0.520486	n.g.
Note. n.g. Not given.

## Sheet: Table S6
TABLE S6. COMPILED WHOLE-ROCK Sr AND Nd ISOTOPES OF LATE TRIASSIC IGNEOUS ROCKS IN THE YIDUN TERRANE
References	Igneous bodies	Sample ID	Age	Rb	Sr	87Rb/86Sr	87Sr/86Sr	(87Sr/86Sr)i	Sm	Nd	147Sm/144Nd	143Nd/144Nd	(143Nd/144Nd)i	εNd(t)
Wu, 2015	Sucuoma pluton	SCM-1h	235	46	287	0.463786	0.710436	0.708886	3.2	17	0.113761	0.512263	0.512088	-4.83251
Wu et al., 2017	Sucuoma pluton	SCM-11h	235	73.8587	512.437	0.41703	0.709598	0.708204	3.7977	19.7471	0.116228	0.512299	0.51212	-4.20393
Wu et al., 2017	Sucuoma pluton	SCM-13h	235	105.283	531.527	0.57301	0.707811	0.705896	3.28455	18.3555	0.108146	0.51234	0.512174	-3.16102
Wu et al., 2017	Sucuoma pluton	SCM-16h	235	123.589	469.595	0.761469	0.709377	0.706832	4.17988	23.1206	0.109259	0.512257	0.512089	-4.81445
Wu et al., 2016	Ganluogou	GL-3h	211	53.0521	717.322	0.213922	0.706305	0.705663	8.49873	36.2748	0.141596	0.512369	0.512173	-3.76772
Wu et al., 2016	Ganluogou	ZK-11H	211	26.2773	583.49	0.130257	0.706018	0.705627	7.431	34.32	0.13086	0.5124	0.512219	-2.87333
Wu et al., 2016	Ganluogou	GL-30h	211	36.9032	498.376	0.214168	0.705875	0.705232	3.05123	13.3013	0.13864	0.512435	0.512244	-2.39992
Wu et al., 2016	Ganluogou	GL-9h	211	102.38	922.619	0.320982	0.706829	0.705866	7.56754	41.4282	0.110395	0.512249	0.512097	-5.26888
Wu et al., 2016	Ganluogou	ZK-14H	211	56.3958	491.34	0.332007	0.706694	0.705698	8.249	37.95	0.131366	0.512291	0.51211	-5.01437
Wu et al., 2016	Ganluogou	GL-7h	211	119.591	543.673	0.63636	0.708103	0.706193	5.67544	28.657	0.11969	0.512252	0.512087	-5.46086
Wu et al., 2016	Ganluogou	ZK-8H	211	80.9562	452.77	0.517262	0.708009	0.706457	5.477	27.72	0.11941	0.51224	0.512075	-5.6875
Wu et al., 2017	Ajiseduo pluton	AJSD-1H	224	134.151	165.3	2.35023	0.718634	0.711146	3.16	16.64	0.114765	0.512111	0.511943	-7.94433
Wu et al., 2017	Ajiseduo pluton	AJSD-2H	224	196.231	202.35	2.81012	0.725012	0.716059	4.534	24.68	0.111018	0.511934	0.511771	-11.2918
Wu et al., 2017	Jiaduocuo pluton	JDC-2H	218	116.2	192.933	1.74332	0.713665	0.70826	4.14865	17.44	0.143762	0.512173	0.511968	-7.60433
Wu et al., 2017	Jiaduocuo pluton	JDC-3H	218	124.2	176.54	2.03669	0.71528	0.708965	4.46215	22.26	0.121144	0.512168	0.511995	-7.07209
Wu et al., 2017	Shaluli	CJM-2H	219	118.6	199.82	1.71795	0.713322	0.707971	4.59515	24.21	0.114707	0.512203	0.512039	-6.19928
Wu et al., 2017	Shaluli	CJM-6H	219	134.3	166.355	2.33725	0.715716	0.708436	4.50965	25.59	0.106501	0.512154	0.512001	-6.92608
Wu et al., 2017	Shaluli	CJM-9H	219	144.3	182.4	2.29045	0.716035	0.708901	5.54515	30.25	0.110779	0.512059	0.5119	-8.89995
Wang et al., 2013	Gacun	GB41	230	12.6	294	0.123961	0.7062	0.705794	4.5	18	0.151102	0.512647	0.51242	1.51245
Wang et al., 2013	Gacun	GB179	230	17.3	603	0.0829767	0.7054	0.705129	5.97	26.8	0.134638	0.512617	0.512414	1.41065
Wang et al., 2013	Gacun	GB191	230	20.7	440	0.136067	0.7056	0.705155	6.81	30.4	0.135394	0.512604	0.5124	1.13469
Wang et al., 2013	Gacun	GB47	230	52.8	202	0.756364	0.7106	0.708126	3.95	20.1	0.118763	0.512165	0.511986	-6.94517
Wang et al., 2013	Gacun	GB54	230	61.3	223	0.795286	0.7087	0.706098	5	20.9	0.144589	0.512447	0.512229	-2.19981
Wang et al., 2013	Gacun	GB64	230	23	237	0.280779	0.7091	0.708181	3.84	18.9	0.122789	0.512257	0.512072	-5.26778
Wang et al., 2013	Gacun	GB169	230	84.3	187	1.30515	0.7159	0.71163	5.14	25.3	0.122782	0.512258	0.512073	-5.24804
Wang et al., 2013	Gacun	GB89	230	186	210	2.56399	0.7147	0.706312	1.89	13.3	0.0858821	0.51227	0.512141	-3.92966
Peng et al., 2014; Fang, 2017	Litang	YD-63	216.6	50.8	92.2	1.59482	0.71367	0.708757	2.76	13.7	0.121751	0.512192	0.512019	-6.63395
Zhu et al., 2019	Litang	LTW03	206	106	192	1.5982	0.714763	0.710081	4.62	25.5	0.109494	0.512233	0.512085	-5.61248
Zhu et al., 2019	Litang	LTW04	206	102	188	1.57058	0.714588	0.709987	4.29	24.8	0.104543	0.512247	0.512106	-5.20898
Zhu et al., 2019	Litang	LTW09	206	104	186	1.61854	0.714225	0.709484	4.08	20.6	0.119697	0.512265	0.512104	-5.25641
He et al., 2013	Dongcuo	DC0901	215	112	154	2.10557	0.715867	0.709429	4.3	21.9	0.11866	0.512154	0.511987	-7.30601
He et al., 2013	Dongcuo	DC0905	215	136	139	2.83307	0.717299	0.708636	4.09	18.5	0.133609	0.512176	0.511988	-7.28715
He et al., 2013	Dongcuo	DC0909	215	150	130	3.34163	0.719117	0.708899	3.55	17.5	0.122595	0.512175	0.512002	-7.00421
He et al., 2013	Dongcuo	DC0912	215	120	157	2.2131	0.716961	0.710194	4.59	21.2	0.130845	0.512146	0.511962	-7.79678
He et al., 2013	Dongcuo	DC0914	215	172	107	4.65724	0.723206	0.708966	4.69	23.5	0.120611	0.512164	0.511994	-7.16441
He et al., 2013	Dongcuo	DC0917	215	129	143	2.61228	0.718086	0.710099	4.12	20	0.124494	0.512149	0.511974	-7.5638
He et al., 2013	Dongcuo	DC0919	215	174	63.8	7.90923	0.733167	0.708983	3.88	18.5	0.126749	0.512189	0.512011	-6.84504
He et al., 2013	Dongcuo	DC0923	215	119	58.6	5.88497	0.725825	0.707831	3.6	18.4	0.118241	0.512182	0.512016	-6.74801
Peng et al., 2014; Fang, 2017	Dongcuo	SJ-206	214.7	166	62.3	7.72721	0.733086	0.709492	3.76	16.7	0.136069	0.512238	0.512047	-6.14697
Peng et al., 2014; Fang, 2017	Dongcuo	SJ-210	214.7	118	169	2.02143	0.715676	0.709504	4.17	21.4	0.117762	0.512171	0.512006	-6.95256
Peng et al., 2014; Fang, 2017	Dongcuo	SJ-213	214.7	230	21.9	30.6581	0.80078	0.707169	3.85	14.5	0.160466	0.512249	0.512024	-6.60134
Peng et al., 2014; Fang, 2017	Dongcuo	SJ-215	214.7	142	138	2.97967	0.717924	0.708826	3.8	19.2	0.119609	0.51216	0.511992	-7.21791
Peng et al., 2014; Fang, 2017	Dongcuo	SJ-218	214.7	177	63.6	8.08772	0.754528	0.729833	4.18	19.9	0.126942	0.512161	0.511983	-7.39949
Peng et al., 2014; Fang, 2017	Dongcuo	YD-65	216.9	217	73.8	8.53129	0.738021	0.711704	4.59	19.6	0.141525	0.512114	0.511913	-8.70131
Peng et al., 2014; Fang, 2017	Dongcuo	YD-72	216.9	96.8	59.4	4.72237	0.725267	0.7107	2.51	11.2	0.135435	0.512108	0.511916	-8.64969
Peng et al., 2014; Fang, 2017	Dongcuo	YD-76	216.9	175	99.6	5.09215	0.726489	0.710781	3.93	19.1	0.124346	0.512083	0.511906	-8.8304
Peng et al., 2014; Fang, 2017	Dongcuo	YD-80	216.9	154	142	3.14105	0.719871	0.710182	6.33	35.8	0.106858	0.512191	0.512039	-6.23796
Wu et al., 2017	Dongcuo	HZS-1	222	119.035	131.3	2.62514	0.717531	0.709242	5.17085	27.11	0.115268	0.512112	0.511945	-7.95995
Wu et al., 2017	Dongcuo	HZS-8	222	121.505	140.4	2.5059	0.717406	0.709494	5.1604	27.52	0.113322	0.512131	0.511966	-7.53392
Wu et al., 2017	Dongcuo	HZS-14	222	159.695	111.7	4.14187	0.722611	0.709534	11.3715	62.19	0.110501	0.512041	0.51188	-9.21053
Wu et al., 2017	Dongcuo	HZS-15	222	182.115	70.3	7.51257	0.732979	0.709259	5.60215	26.84	0.126137	0.512051	0.511868	-9.45876
Peng et al., 2014; Fang, 2017	Shengmu	SJ-233	218.3	70.6	607	0.336478	0.708069	0.707024	3.75	16.5	0.137352	0.512227	0.512031	-6.36963
Peng et al., 2014; Fang, 2017	Shengmu	SJ-235	218.3	125	178	2.03291	0.714851	0.708539	6.85	35	0.118278	0.512157	0.511988	-7.20398
Peng et al., 2014; Fang, 2017	Shengmu	SJ-242	216.1	119	396	0.869515	0.710057	0.707385	4.52	25.9	0.105468	0.512164	0.512015	-6.73574
Peng et al., 2014; Fang, 2017	Shengmu	SJ-244	216.1	122	388	0.909828	0.710197	0.707401	3.5	15.5	0.136464	0.512177	0.511984	-7.33763
Peng et al., 2014; Fang, 2017	Shengmu	SJ-250	216.1	78.4	668	0.339564	0.709037	0.707993	4.28	25.8	0.100254	0.512105	0.511963	-7.74334
Peng et al., 2014; Fang, 2017	Shengmu	SJ-254	216.1	104	384	0.783642	0.70983	0.707422	4.2	19.8	0.128195	0.512201	0.51202	-6.64093
Peng et al., 2014; Fang, 2017	Shengmu	SJ-247	216.5	141	420	0.971429	0.710432	0.707441	5.84	30.1	0.117254	0.512178	0.512012	-6.7838
He et al., 2013	Maxiongou	XC0902	216	146	115	3.67654	0.718505	0.707211	2.5	13.4	0.112751	0.512206	0.512047	-6.11812
He et al., 2013	Maxiongou	XC0903	216	186	90.2	5.97536	0.724956	0.7066	3.06	16.4	0.112762	0.512202	0.512043	-6.19649
He et al., 2013	Maxiongou	XC0905	216	192	81.3	6.84465	0.72691	0.705884	3.44	17.9	0.116143	0.51223	0.512066	-5.74329
Liu et al., 2006	Xiangcheng	CX3033-1	222	n.g.	n.g.	n.g.	n.g.	n.g.	4.673	25.16	0.112	0.512348	0.512185	-3.26106
Wang et al., 2013	Xiangcheng	XC05	228	45.8	957	0.138427	0.7063	0.705851	5.61	29.4	0.115323	0.512343	0.512171	-3.3906
Gao et al., 2018	Xiuwacu	XWCBT-1-T2	199.8	180	596	0.873669	0.707596	0.705114	4.8	29.3	0.0990098	0.512389	0.51226	-2.36926
Gao et al., 2018	Xiuwacu	XWC12-B1	199.8	176	424	1.20087	0.708223	0.704811	4.5	31.9	0.085256	0.512374	0.512263	-2.31103
Gao et al., 2018	Xiuwacu	XWC12-B2	199.8	179	549	0.943215	0.707814	0.705134	4.9	28.6	0.103547	0.512412	0.512277	-2.03616
Gao et al., 2018	Xiuwacu	XWC13-B7-2	199.8	237	641	1.06961	0.707967	0.704928	5.1	31.4	0.0981635	0.512436	0.512308	-1.43038
Gao et al., 2018	Xiuwacu	XWC13-B18	199.8	138	701	0.569461	0.707174	0.705556	5.3	31.6	0.101367	0.512417	0.512284	-1.88294
Gao et al., 2018	Xiuwacu	XWC13-B19B	199.8	142	583	0.704593	0.707547	0.705545	3.8	20.1	0.11426	0.512406	0.512257	-2.42664
Gao et al., 2018	Xiuwacu	XWC13-B19C	199.8	175	560	0.904036	0.707951	0.705382	4.3	26.6	0.0976998	0.512411	0.512283	-1.90646
Gao et al., 2018	Xiuwacu	XWC13-B19D	199.8	161	503	0.925994	0.708287	0.705656	4.6	25.4	0.109454	0.512417	0.512274	-2.08932
Gao et al., 2018	Xiuwacu	XWC13-B19E	199.8	183	506	1.0463	0.708438	0.705465	3.8	18.8	0.122162	0.512441	0.512281	-1.94521
Chen et al., 2014	Lannitang	LNTA	216.7	53.2	1115	0.138009	0.706445	0.70602	5.86	33.8	0.104781	0.512369	0.51222	-2.70866
Chen et al., 2014	Lannitang	LNTB	216.7	3.26	2410	0.00391248	0.705961	0.705949	9.24	56.3	0.0991899	0.512381	0.51224	-2.31968
Chen et al., 2014	Lannitang	LNTY	216.7	56.8	214	0.767872	0.708382	0.706016	4.7	26.7	0.106386	0.512304	0.512153	-4.02171
Chen et al., 2014	Hongshan	HSB	213.4	52.8	1301	0.117387	0.706265	0.705909	7.08	43.7	0.0979161	0.512368	0.512231	-2.57975
Chen et al., 2014	Xuejiping	XJPA	215.9	87.6	392	0.646445	0.707431	0.705446	5.19	30.8	0.101842	0.512431	0.512287	-1.42689
Chen et al., 2014	Chundu	CD-1	215	109	293	1.07632	0.709036	0.705745	4.63	30.6	0.0914462	0.512404	0.512275	-1.67927
Chen et al., 2014	Pulang	PL-01	211.8	65.5	877	0.216005	0.70527	0.704619	2.52	12.1	0.12587	0.512415	0.512241	-2.43886
Chen et al., 2014	Pulang	PL-03	217.2	59.4	1043	0.164727	0.706241	0.705732	6.51	31.5	0.124905	0.51242	0.512242	-2.2657
Chen et al., 2014	Pulang	PL-06	215.3	249	396	1.81963	0.711296	0.705724	2.8	13.9	0.121744	0.512386	0.512214	-2.85978
Wang et al., 2011	Pulang	BQ-53	224.2	95.6	1130	0.244697	0.7059	0.70512	4.52	26	0.105066	0.512324	0.51217	-3.50715
Wang et al., 2011	Pulang	BQ-208	224.2	81.7	1180	0.200258	0.7059	0.705261	3.91	22.5	0.105023	0.512251	0.512097	-4.93072
Wang et al., 2011	Pulang	BQ-27	217.9	169	814	0.600597	0.7076	0.705739	5.27	26.1	0.122033	0.512403	0.512229	-2.51115
Wang et al., 2011	Pulang	BQ-48	217.9	136	742	0.530199	0.7072	0.705557	6.83	33.5	0.123221	0.51242	0.512244	-2.21242
Wang et al., 2011	Disuga	BQ-25	219.8	68.1	565	0.348647	0.7068	0.70571	5.19	29.7	0.105611	0.51233	0.512178	-3.45678
Wang et al., 2011	Disuga	BQ-86	219.8	140	767	0.528003	0.7072	0.705549	5.28	26.4	0.120875	0.512395	0.512221	-2.61668
Wang et al., 2011	Xuejiping	BQ-11	215.2	81.6	1830	0.128971	0.706	0.705605	6.53	35.2	0.112119	0.512414	0.512256	-2.04966
Wang et al., 2011	Xuejiping	BQ-153	215.2	87.7	793	0.319893	0.7066	0.705621	4.31	26.5	0.0982957	0.512376	0.512238	-2.41135
Wang et al., 2011	Xuejiping	BQ-184	215.2	63.8	666	0.277093	0.7066	0.705752	6.46	36.6	0.106674	0.512411	0.512261	-1.95855
Wang et al., 2011	Pingdong	BQ-155A	230.3	115	842	0.395061	0.7066	0.705306	4.2	24.4	0.104032	0.512402	0.512245	-1.88296
Wang et al., 2011	Disuga	YD-14	220.7	20.4	1120	0.0526818	0.7059	0.705735	6.25	34.3	0.110126	0.512376	0.512217	-2.67579
Wang et al., 2011	Disuga	YD-26	220.7	30	1040	0.0834344	0.7061	0.705838	6.09	34.6	0.106375	0.51234	0.512186	-3.27269
Wang et al., 2011	Disuga	YD-34	220.7	59.5	432	0.39844	0.7078	0.706549	4.78	25.2	0.114637	0.512319	0.512153	-3.91548
Wang et al., 2011	Disuga	YD-38	220.7	37.7	672	0.162279	0.7069	0.706391	4.61	24.1	0.115607	0.512334	0.512167	-3.65005
Wang et al., 2011	Disuga	YD-42	220.7	91.9	927	0.286752	0.7064	0.7055	4.53	25.6	0.106945	0.51236	0.512206	-2.89839
Wang et al., 2011	Disuga	YD-69	220.7	109	901	0.349936	0.7068	0.705702	5.42	27	0.121322	0.512392	0.512217	-2.67915
Wang et al., 2011	Disuga	YD-71	220.7	76.5	716	0.309067	0.7072	0.70623	3.9	20.6	0.114418	0.512306	0.512141	-4.16303
Leng et al., 2014	Disuga	DSG04-1	220	55.3	1100	0.14541	0.706172	0.705717	7.57	41.3	0.110778	0.512407	0.512247	-2.09679
Leng et al., 2014	Disuga	DSG07-1	220	31.5	1470	0.0619796	0.706063	0.705869	5.79	33.1	0.105719	0.51238	0.512228	-2.48161
Leng et al., 2014	Disuga	DSG07-3-1	220	70.3	1190	0.170873	0.706282	0.705747	5.71	30.6	0.112777	0.512389	0.512227	-2.50428
Leng et al., 2014	Disuga	DSG07-3-2	220	23.1	1890	0.0353511	0.705993	0.705882	5.4	31.9	0.102307	0.512374	0.512227	-2.50283
Leng et al., 2014	Disuga	DSG07-5	220	101	1120	0.260843	0.706546	0.70573	7.09	40.3	0.106329	0.512438	0.512285	-1.36671
Leng et al., 2014	Disuga	DSG07-7	220	140	987	0.410307	0.707069	0.705785	5.87	32.8	0.10816	0.512373	0.512217	-2.68683
Leng et al., 2014	Disuga	DSG07-8	220	88.8	1090	0.235648	0.706584	0.705847	5.76	34.1	0.102087	0.512386	0.512239	-2.26245
Leng et al., 2014	Disuga	DSG10-2	220	131	1475	0.256897	0.706616	0.705812	9.28	56.9	0.098569	0.512388	0.512246	-2.12453
Leng et al., 2014	Disuga	DSG10-6	220	67.2	1845	0.105349	0.706141	0.705811	7.01	43.7	0.0969508	0.512489	0.512349	-0.107768
Leng et al., 2014	Disuga	DSG10-7	220	35.3	1510	0.0676167	0.706069	0.705857	7.13	44.7	0.0964029	0.512421	0.512282	-1.41957
Leng et al., 2014	Disuga	DSG10-12	220	58.6	1570	0.107958	0.706083	0.705745	8.01	44.7	0.108302	0.512439	0.512283	-1.40264
Leng et al., 2014	Disuga	DSG10-13	220	47.1	2010	0.0677764	0.706009	0.705797	6.55	38.3	0.10336	0.512451	0.512302	-1.02956
Leng et al., 2014	Disuga	DSG10-15	220	89.8	1020	0.254655	0.706544	0.705747	9.55	49.9	0.115668	0.512432	0.512265	-1.74626
Leng et al., 2014	Lannitang	LNT10-1	220	58.9	651	0.261705	0.706586	0.705767	7.23	41.7	0.104791	0.512542	0.512391	0.706353
Leng et al., 2014	Lannitang	LNT10-3	220	52.6	1460	0.104208	0.706348	0.706022	6.49	37.4	0.104877	0.512417	0.512266	-1.73579
Peng et al., 2014; Fang, 2017	Xuejiping	SJ-164	216	54.9	329	0.482698	0.707075	0.705592	5.08	29.6	0.103724	0.5124	0.512253	-2.08265
Peng et al., 2014; Fang, 2017	Xuejiping	SJ-171	216	67.2	830	0.234184	0.706292	0.705573	4.52	26.1	0.104666	0.512404	0.512256	-2.03057
Peng et al., 2014; Fang, 2017	Xuejiping	SJ-286	216	76.9	878	0.253357	0.707124	0.706346	5.4	35.3	0.0924514	0.512288	0.512157	-3.9576
Peng et al., 2014; Fang, 2017	Xuejiping	SJ-177	216	57.3	675	0.245539	0.706407	0.705653	6.78	40	0.102442	0.512405	0.51226	-1.94968
Peng et al., 2014; Fang, 2017	Xuejiping	SJ-181	216	92.4	154	1.73543	0.706095	0.700764	6.52	35.4	0.111315	0.512422	0.512265	-1.8627
Peng et al., 2014; Fang, 2017	Xuejiping	SJ-186	216	55.9	153	1.05677	0.706136	0.70289	6.23	34.9	0.107888	0.512428	0.512275	-1.65104
Peng et al., 2014; Fang, 2017	Xuejiping	SJ-188	216	57.1	155	1.06552	0.706144	0.702871	6.02	34	0.107011	0.512434	0.512283	-1.50974
Kong et al., 2016	Pulang	12PL5618-270	216.1	94	1105.08	0.246024	0.70576	0.705004	4.3	n.g.	0.1031	0.51233	0.512184	-3.43047
Kong et al., 2016	Pulang	12PL0713-713	215	159	743	0.619052	0.70755	0.705657	4.8	n.g.	0.1165	0.51238	0.512216	-2.83574
Kong et al., 2016	Pulang	12PL6628-588	218.9	178	796	0.646949	0.70859	0.706576	5.29	n.g.	0.1193	0.51239	0.512219	-2.67895
Kong et al., 2016	Pulang	12PLE302-118	217.9	150	878	0.494081	0.70478	0.703249	5.96	n.g.	0.1116	0.5125	0.512341	-0.327565
Kong et al., 2016	Disuga	10NRH-09	213.1	64.8	789.6	0.237382	0.70663	0.705911	5.34	n.g.	0.1037	0.5124	0.512255	-2.11641
Chen et al., 2017	Xiaxiaoliu	10XXL-01	216.1	1.24	462	0.00776324	0.706243	0.706219	5.95	22.3	0.161276	0.512917	0.512689	6.42045
Chen et al., 2017	Xiaxiaoliu	10XXL-08	216.1	0.9	435	0.00598359	0.70495	0.704932	5.1	19.8	0.15569	0.512891	0.512671	6.06719
Chen et al., 2017	Xiaxiaoliu	10XXL-10	216.1	1.95	199	0.0283412	0.705604	0.705517	4.86	17.4	0.16883	0.512951	0.512712	6.87554
Chen et al., 2017	Xiaxiaoliu	10XXL-11	216.1	2.62	653	0.0116048	0.705955	0.705919	5.83	22.7	0.155238	0.512891	0.512671	6.07966
Chen et al., 2017	Xiaxiaoliu	10XXL-17	216.1	33.4	126	0.766712	0.706074	0.703718	4.88	17.5	0.168555	0.512921	0.512683	6.29761
Chen et al., 2017	Xiaxiaoliu	10XXL-18	216.1	1.73	170	0.02943	0.704596	0.704506	5.33	19.6	0.164371	0.512873	0.512641	5.47625
Chen et al., 2017	Xiaxiaoliu	11XXL-03	216.1	0.88	402	0.00633166	0.706193	0.706174	6.38	26	0.148319	0.512841	0.512631	5.29477
Cao et al., 2018	Pulang	6628-471	216	256.1	749	0.989122	0.70763	0.704592	6.04	32	0.114076	0.512431	0.51227	-1.76324
Cao et al., 2018	Pulang	6628-588	216	177.9	796	0.646586	0.708594	0.706608	5.29	27.2	0.117542	0.512393	0.512227	-2.60052
Cao et al., 2018	Pulang	E002-201	216	147	850	0.500295	0.707765	0.706228	6.47	35	0.111724	0.512431	0.512273	-1.69833
Cao et al., 2018	Pulang	0713-713	216	158.8	743	0.618274	0.707554	0.705655	4.8	25.4	0.114212	0.512384	0.512223	-2.68431
Cao et al., 2018	Pulang	0713-897	216	139.1	734	0.54825	0.708234	0.70655	5.64	30.1	0.113244	0.512384	0.512224	-2.65761
Cao et al., 2018	Pulang	0713-980	216	172.1	767	0.64909	0.707563	0.705569	5.03	26.5	0.114716	0.512357	0.512195	-3.22518
Cao et al., 2018	Pulang	2812-494	216	208.7	1090	0.553853	0.707066	0.705365	21.81	165.1	0.0798395	0.512433	0.51232	-0.779586
Cao et al., 2018	Pulang	E601-20	216	122	2050	0.172146	0.706868	0.706339	11.5	77.1	0.0901454	0.512345	0.512218	-2.78148
Cao et al., 2018	Pulang	E601-40	216	292	767	1.10156	0.709948	0.706564	7.51	35.7	0.127141	0.512476	0.512296	-1.24541
Cao et al., 2018	Pulang	E303-85	216	201	635	0.915853	0.709538	0.706725	6.26	33	0.114648	0.512392	0.51223	-2.54019
Cao et al., 2018	Pulang	E101-500	216	167	830	0.58204	0.707452	0.705664	7	33.1	0.127815	0.512466	0.512285	-1.45919
Yang et al., 2018	Pulang	13SBB2	225	124.5	509	0.70773	0.709841	0.707576	6.9	34.5	0.120871	0.512264	0.512086	-5.12313
Yang et al., 2018	Pulang	13SBB3	225	170	538	0.914276	0.709714	0.706788	6.8	33.1	0.124157	0.512242	0.512059	-5.64696
Yang et al., 2018	Pulang	13SBB5	225	123.5	536	0.666666	0.709608	0.707474	6.6	31.5	0.126627	0.512264	0.512078	-5.28856
Yang et al., 2018	Pulang	13BQMB8	215	105	769	0.394961	0.706908	0.7057	5.9	28.1	0.126898	0.51242	0.512241	-2.34059
Yang et al., 2018	Pulang	13BQMB9	215	106	878	0.349218	0.706749	0.705681	6.1	29.8	0.123714	0.512411	0.512237	-2.42882
Yang et al., 2018	Pulang	13BQMB10	215	104.6	1000	0.302542	0.706017	0.705092	7.2	38.7	0.112441	0.512393	0.512235	-2.47055
Yang et al., 2018	Pulang	PL-BB-B4	215	98.4	1015	0.280403	0.706024	0.705167	3.5	16.3	0.129774	0.512414	0.512231	-2.53668
Yang et al., 2018	Xuejiping	XJP-B7	221	105.6	107	2.85509	0.708053	0.699079	4.537	26.22	0.104576	0.512295	0.512144	-4.09255
Yang et al., 2018	Xuejiping	XJP-B5	214	100.7	716.7	0.406401	0.706219	0.704983	6.627	41.09	0.0974751	0.512471	0.512335	-0.544642
Yang et al., 2018	Songnuo	SN-5ZK1501	218	105.8	899.1	0.340419	0.707965	0.70691	3.872	24.64	0.0949735	0.512419	0.512283	-1.45382
Yang et al., 2018	Songnuo	SN-5ZK2301	218	259.5	721.5	1.04087	0.711729	0.708502	5.772	31.11	0.112136	0.512519	0.512359	0.0213061
Yang et al., 2018	Songnuo	SN-5ZK3901	218	116.5	1031.3	0.32675	0.706523	0.70551	4.289	26.22	0.0988598	0.512309	0.512168	-3.69642
Yang et al., 2018	Songnuo	SN-5ZK3202	218	124.8	876.8	0.411701	0.706352	0.705075	3.748	22.87	0.0990484	0.512482	0.512341	-0.32383
Wang et al., 2018	Pulang	PL-60	211.6	98	811	0.34953	0.706612	0.70556	3.5	18.6	0.113725	0.512357	0.5122	-3.24442
Wang et al., 2018	Pulang	PL-62	211.6	104	774	0.388667	0.70675	0.70558	3.75	19.9	0.113888	0.512347	0.512189	-3.444
Wang et al., 2018	Pulang	PL-64	211.6	93	803	0.335	0.706574	0.705566	3.44	16.8	0.123751	0.51235	0.512179	-3.65203
Wang et al., 2018	Pulang	PL-65	211.6	106	853	0.359454	0.706789	0.705707	2.82	14.3	0.119183	0.512338	0.512173	-3.76275
Wang et al., 2018	Pulang	PL-66	211.6	85	908	0.270771	0.706375	0.70556	3.71	18.4	0.121859	0.512356	0.512187	-3.48378
Wang et al., 2018	Pulang	PL-202	211.6	101	898	0.325329	0.706586	0.705607	4.45	25.5	0.105467	0.512331	0.512185	-3.52868
Wang et al., 2018	Pulang	PL-209	211.6	173	668	0.749227	0.708133	0.705878	3.95	19.4	0.123054	0.512361	0.512191	-3.4185
Wang et al., 2018	Pulang	PL-210	214.1	165	652	0.732101	0.707927	0.705698	4.32	22.9	0.114012	0.512374	0.512214	-2.89401
Wang et al., 2018	Pulang	PL-221	208.8	173	761	0.657637	0.707683	0.70573	6.09	33	0.111535	0.512424	0.512272	-1.908
Wang et al., 2018	Pulang	PL-223	208.8	103	951	0.313267	0.706107	0.705177	6.33	32.7	0.116994	0.512412	0.512252	-2.28779
Wang et al., 2018	Pulang	PL-225	208.8	31	867	0.103427	0.706915	0.706608	1.76	8.7	0.122264	0.512387	0.51222	-2.91627
Wang et al., 2018	Pulang	PL-229	208.8	78	663	0.340453	0.711257	0.710246	5.98	22.2	0.162803	0.512474	0.512252	-2.29944
Wang et al., 2019	Xiuwacu	SXWC10-1	220.7	185	474	1.12919	0.708844	0.7053	4.89	38.7	0.0763671	0.512426	0.512316	-0.748178
Wang et al., 2019	Xiuwacu	SXWC10-6	220.7	194	475	1.18154	0.70802	0.704311	4.65	28.6	0.0982643	0.512432	0.51229	-1.24839
Wang et al., 2019	Xiuwacu	XWC10-8	220.7	164	576	0.823642	0.707506	0.704921	4.32	28.8	0.0906567	0.512426	0.512295	-1.15103
Wang et al., 2019	Xiuwacu	XWC10-10	220.7	210	531	1.14413	0.708297	0.704706	4.46	23.5	0.114703	0.512408	0.512242	-2.18025
Wang et al., 2019	Xiuwacu	SXWC10-11	220.7	190	535	1.02742	0.708263	0.705038	5.06	26.5	0.115403	0.512465	0.512298	-1.08748
Wang et al., 2019	Xiuwacu	SXWC10-12	220.7	187	599	0.903136	0.708009	0.705174	3.89	26.9	0.0873987	0.512416	0.51229	-1.25435
Wang et al., 2019	Xiuwacu	XS12-17	220.7	155	764	0.586868	0.707149	0.705307	5.83	34	0.103633	0.512406	0.512256	-1.90719
Wang et al., 2019	Xiuwacu	XS12-01	217.5	282	683	1.19445	0.708077	0.704382	4.05	28.1	0.0871076	0.512417	0.512293	-1.27141
Wang et al., 2019	Xiuwacu	XS12-06	217.5	200	733	0.789298	0.707452	0.70501	4.57	30.9	0.0893851	0.512414	0.512287	-1.39324
Wang et al., 2019	Xiuwacu	XS12-07	217.5	203	735	0.798959	0.707473	0.705002	4.44	29.3	0.0915844	0.512404	0.512274	-1.64952
Wang et al., 2019	Xiuwacu	XWC11-42	213.9	212	746	0.822075	0.70745	0.704949	6.78	40.8	0.100433	0.512408	0.512267	-1.86152
Wang et al., 2019	Xiuwacu	XWC11-45	213.9	176	849	0.599726	0.708238	0.706414	6.19	38.5	0.0971711	0.512415	0.512279	-1.63577
Wang et al., 2019	Xiuwacu	XWC11-46	213.9	222	816	0.787018	0.707623	0.705229	5.3	35.4	0.0904854	0.512401	0.512274	-1.72635
Wang et al., 2019	Hongshan	Hongshan	217.5	114	1120	0.294411	0.706337	0.705426	6.28	36.2	0.104848	0.512435	0.512286	-1.41297
Wang et al., 2019	Hongshan	Hongshan	217.5	76	1421	0.154694	0.70602	0.705541	6.87	38.5	0.107847	0.512444	0.51229	-1.32062
Wang et al., 2019	Hongshan	Hongshan	217.5	103	1291	0.230769	0.706299	0.705585	6.4	36.5	0.105973	0.512424	0.512273	-1.65892
Note. n.g. Not given.

## Sheet: Table S7
TABLE S7. COMPILED WHOLE-ROCK MAJOR AND TRACE ELEMENT CONCENTRATIONS OF MAFIC AND ULTRAMAFIC ROCKS FROM OPHIOLITIC COMPLEX IN THE GANZI-LITANG SUTURE ZONE
References	Location	Sample ID	Lithology	Longitude	Latitude	SiO2	TiO2	Al2O3	Fe2O3	FeO	MnO	MgO	CaO	Na2O	K2O	P2O5	LOI	Total	Li	Be	K	Sc	Ti	V	Cr	Co	Ni	Cu	Zn	Ga	Rb	Sr	Y	Zr	Nb	Sn	Cs	Ba	La	Ce	Pr	Nd	Sm	Eu	Gd	Tb	Dy	Ho	Er
Mo et al., 1993	Litang	L-17	Peridotite			39.58	0.51	5.65	5.07	4.69	0.15	30.79	3.66	0.2	0.2	0.06	9.04	99.6			1826.36		3417.23								10.8	25.4	11.81	32.8	4.7			20.7	3.69	9.16	1.4	6.01	1.91	0.66	2.2	0.43	2.31	0.49	1.39
Mo et al., 1993	Litang	L-2-2	Peridotite			40.09	1.24	11.56	2.32	8.61	0.16	19.3	8.16	0.8	0.08	0.19	6.89	99.4			747.15		8033.49								4.6	67.8	16.42	79.1	12.7			40.6	12.64	25.28	3.37	14.16	3.52	1.2	3.7	0.57	3.11	0.67	1.79
Mo et al., 1993	Litang	L-25-2	Peridotite			41.45	0.85	8.9	3.14	7.06	0.15	20.75	9.87	0.22	0.05	0.08	7	99.52			415.08		5515.53								2.2	33.5	19.07	56.2	7.5			16.9	5.59	15.3	2.47	12.06	3.73	1.27	4.43	0.79	4.32	0.84	2.16
Mo et al., 1993	Litang	L-23	Anorthosite			45.36	0.69	18.39	1.69	4.72	0.12	8.33	13.26	1.96	0.82	0.07	4.47	99.88			7139.42		4316.5								15.2	321.4	16.81	36.2	6.5			149.2	4.32	10.76	1.68	7.84	2.44	1.02	3.13	0.6	3.32	0.7	1.96
Mo et al., 1993	Litang	I-13	Gabbro			47.15	1.5	15.6	2.9	7.19	0.18	7.49	9.8	3.31	0.43	0.05	3.78	99.38			3735.7		9412.4								8	224.2	19.74	73.6	7.7			144	4.28	10.72	1.7	8.18	2.67	0.95	3.45	0.59	3.82	0.8	2.36
Mo et al., 1993	Litang	I-27	Gabbro			45.28	1.23	15.15	2.85	7.82	0.18	9.46	9.29	2.28	1.33	0.11	4.51	99.49			11622.3		7793.7								25	436.1	16.85	80	7.9			307.7	4.44	11.14	1.75	8.72	2.61	0.98	3.16	0.56	3.33	0.7	1.99
Mo et al., 1993	Litang	L-4-1	Basalt			46.9	2.03	14.58	3.53	8.94	0.18	6.52	9.6	3.7	0.28	0.25	3.28	99.79			2407.48		12469.9								7.9	251.2	27.53	128.8	18.3			127.3	12.03	26.66	3.82	17.26	4.73	1.72	5.29	0.83	5.45	1.09	3.04
Mo et al., 1993	Litang	L-16	Basalt			44.36	1.19	13.93	3.69	6.58	0.18	10.61	10.91	2.26	0.2	0.13	5.52	99.56			1743.35		7613.83								4.9	189.4	17.84	80.2	9.8			40.5	4.27	11.26	1.77	8.86	2.72	0.99	3.31	0.56	3.48	0.72	2.07
Mo et al., 1993	Litang	L-12	Basalt			35.02	0.91	14.5	4.03	3.03	0.13	5	19.8	3.12	0.1	0.12	14.4	100.16			1162.23		7493.93								1.8	200.8	14.5	50.4	7.1			47.9	4.42	10.26	1.53	7.71	2.21	0.87	2.7	0.46	2.88	0.59	1.66
[truncated: 60 more rows]
[truncated: 9 more columns]
